# Supplementary material for: A conserved maternal-specific repressive domain in Zelda revealed by Cas9-mediated mutagenesis in Drosophila melanogaster
Source: PLoS Genet. 2017 Dec 19;13(12):e1007120. doi: 10.1371/journal.pgen.1007120 (PMC5752043; doi:10.1371/journal.pgen.1007120)
Supplement: S2 Table — Tabs indicate lists of genes differentially expressed, genes up and down regulated, genes subject to maternal and zygotic degradation, genes that are associated with ZLD-binding sites, and data for Fisher’s exact test. (XLSX) [file pgen.1007120.s002.xlsx]

## Sheet: Cufflinks data
test_id	gene_id	gene	locus	sample_1	sample_2	status	value_1	value_2	log2(fold_change)	test_stat	p_value	q_value	significant
XLOC_001252	XLOC_001252	Mhc	2L:16766565-16788766	Wild Type	ZnF2 Mutant	OK	3.39804	0.0305943	-6.7953	-2.64413	5e-05	0.00197765	yes
XLOC_010343	XLOC_010343	CG8147	3R:9494800-9496723	Wild Type	ZnF2 Mutant	OK	91.1215	2.60077	-5.13078	-5.74949	5e-05	0.00197765	yes
XLOC_006893	XLOC_006893	CG32485	3L:3050322-3051765	Wild Type	ZnF2 Mutant	OK	16.6619	0.526775	-4.98322	-3.48725	5e-05	0.00197765	yes
XLOC_004004	XLOC_004004	Ih	2R:14276129-14300095	Wild Type	ZnF2 Mutant	OK	5.14879	0.265103	-4.27961	-2.39005	5e-05	0.00197765	yes
XLOC_003615	XLOC_003615	l(2)03659	2R:9390164-9395281	Wild Type	ZnF2 Mutant	OK	12.8534	0.672471	-4.25654	-4.14347	5e-05	0.00197765	yes
XLOC_007287	XLOC_007287	Tsp66E	3L:8905917-8932065	Wild Type	ZnF2 Mutant	OK	16.2042	0.895934	-4.17683	-4.15949	5e-05	0.00197765	yes
XLOC_004406	XLOC_004406	CG45087	2R:18536766-18539416	Wild Type	ZnF2 Mutant	OK	130.409	9.96511	-3.71002	-6.78723	5e-05	0.00197765	yes
XLOC_001762	XLOC_001762	CG5080	2L:1160289-1163886	Wild Type	ZnF2 Mutant	OK	14.1342	1.46297	-3.27222	-3.49875	5e-05	0.00197765	yes
XLOC_001833	XLOC_001833	Uch	2L:2212737-2214211	Wild Type	ZnF2 Mutant	OK	67.5268	7.21337	-3.22671	-4.47832	5e-05	0.00197765	yes
XLOC_007132	XLOC_007132	CG18769	3L:6550737-6603366	Wild Type	ZnF2 Mutant	OK	61.5587	7.34499	-3.06713	-4.27854	5e-05	0.00197765	yes
XLOC_005845	XLOC_005845	krimp	2R:16238102-16240722	Wild Type	ZnF2 Mutant	OK	57.9529	7.29408	-2.99008	-4.78591	5e-05	0.00197765	yes
XLOC_002037	XLOC_002037	hoe1	2L:4908580-4932384	Wild Type	ZnF2 Mutant	OK	13.7496	1.90202	-2.85378	-3.41989	5e-05	0.00197765	yes
XLOC_013702	XLOC_013702	CG7601	3R:29725829-29736745	Wild Type	ZnF2 Mutant	OK	46.57	6.95889	-2.74247	-3.28334	5e-05	0.00197765	yes
XLOC_005572	XLOC_005572	muskelin	2R:12628696-12632378	Wild Type	ZnF2 Mutant	OK	92.3416	13.822	-2.74002	-5.42493	5e-05	0.00197765	yes
XLOC_006054	XLOC_006054	Jheh1	2R:18853433-18855087	Wild Type	ZnF2 Mutant	OK	23.1472	3.49253	-2.72849	-3.26331	5e-05	0.00197765	yes
XLOC_000273	XLOC_000273	Thor	2L:3478433-3479612	Wild Type	ZnF2 Mutant	OK	34.5971	5.28142	-2.71165	-2.90711	5e-05	0.00197765	yes
XLOC_005635	XLOC_005635	CG18278	2R:13407010-13409887	Wild Type	ZnF2 Mutant	OK	13.3998	2.14859	-2.64075	-2.797	5e-05	0.00197765	yes
XLOC_012692	XLOC_012692	CG8066	3R:14567610-14568847	Wild Type	ZnF2 Mutant	OK	140.044	22.6512	-2.62823	-3.95457	5e-05	0.00197765	yes
XLOC_007537	XLOC_007537	CAH2	3L:12177600-12183347	Wild Type	ZnF2 Mutant	OK	14.7428	2.42717	-2.60266	-2.96381	5e-05	0.00197765	yes
XLOC_000885	XLOC_000885	CG43725	2L:11075512-11075962	Wild Type	ZnF2 Mutant	OK	1009.8	170.988	-2.5621	-5.49107	5e-05	0.00197765	yes
XLOC_007649	XLOC_007649	26-29-p	3L:13994230-13996571	Wild Type	ZnF2 Mutant	OK	223.149	39.3404	-2.50392	-5.49049	5e-05	0.00197765	yes
XLOC_012106	XLOC_012106	zen2	3R:6743134-6744136	Wild Type	ZnF2 Mutant	OK	38.5493	6.90749	-2.48047	-2.98647	5e-05	0.00197765	yes
XLOC_012388	XLOC_012388	Irp-1B	3R:10408617-10412869	Wild Type	ZnF2 Mutant	OK	15.408	2.77859	-2.47125	-3.03475	5e-05	0.00197765	yes
XLOC_002989	XLOC_002989	amos	2L:18596135-18596921	Wild Type	ZnF2 Mutant	OK	109.459	20.125	-2.44333	-3.36007	5e-05	0.00197765	yes
XLOC_011412	XLOC_011412	tld	3R:24749730-24753510	Wild Type	ZnF2 Mutant	OK	71.3969	15.5557	-2.19842	-4.53232	5e-05	0.00197765	yes
XLOC_008406	XLOC_008406	CG13902	3L:839979-841360	Wild Type	ZnF2 Mutant	OK	40.5014	8.9168	-2.18338	-3.14266	5e-05	0.00197765	yes
XLOC_010443	XLOC_010443	CG4570	3R:10856806-10858066	Wild Type	ZnF2 Mutant	OK	515.659	116.732	-2.14322	-5.36028	5e-05	0.00197765	yes
XLOC_008969	XLOC_008969	CG43783,orb2	3L:8932234-8954463	Wild Type	ZnF2 Mutant	OK	16.8306	3.814	-2.14171	-3.08842	5e-05	0.00197765	yes
XLOC_000155	XLOC_000155	Kebab	2L:2045493-2048054	Wild Type	ZnF2 Mutant	OK	17.2874	3.93444	-2.13549	-2.90143	5e-05	0.00197765	yes
XLOC_002196	XLOC_002196	nrv1	2L:6778554-6786861	Wild Type	ZnF2 Mutant	OK	20.5222	4.90445	-2.06502	-2.82829	5e-05	0.00197765	yes
XLOC_013730	XLOC_013730	Acph-1	3R:29991143-29993411	Wild Type	ZnF2 Mutant	OK	34.4375	8.27863	-2.05652	-2.93999	5e-05	0.00197765	yes
XLOC_013466	XLOC_013466	LpR1	3R:25741347-25763105	Wild Type	ZnF2 Mutant	OK	18.6369	4.48103	-2.05626	-3.16143	5e-05	0.00197765	yes
XLOC_012109	XLOC_012109	bcd	3R:6755841-6759466	Wild Type	ZnF2 Mutant	OK	37.7548	9.21942	-2.03391	-2.86836	5e-05	0.00197765	yes
XLOC_005113	XLOC_005113	pgant3	2R:7057653-7061732	Wild Type	ZnF2 Mutant	OK	23.2164	5.75876	-2.01131	-3.07718	5e-05	0.00197765	yes
XLOC_010941	XLOC_010941	Pxt	3R:17719453-17722955	Wild Type	ZnF2 Mutant	OK	53.8133	14.029	-1.93956	-3.48014	5e-05	0.00197765	yes
XLOC_007320	XLOC_007320	Hsp22,Hsp67Bb	3L:9372721-9374964	Wild Type	ZnF2 Mutant	OK	71.8348	18.8274	-1.93185	-3.04362	5e-05	0.00197765	yes
XLOC_005171	XLOC_005171	CG18812	2R:7716806-7735622	Wild Type	ZnF2 Mutant	OK	93.608	24.6573	-1.92462	-3.41584	5e-05	0.00197765	yes
XLOC_005123	XLOC_005123	Ady43A	2R:7243023-7245776	Wild Type	ZnF2 Mutant	OK	16.1407	4.25905	-1.9221	-2.62361	5e-05	0.00197765	yes
XLOC_000220	XLOC_000220	CG2991	2L:2857163-2868548	Wild Type	ZnF2 Mutant	OK	35.6186	9.66723	-1.88146	-3.35047	5e-05	0.00197765	yes
XLOC_001515	XLOC_001515	cad	2L:20770730-20783135	Wild Type	ZnF2 Mutant	OK	77.6038	21.3913	-1.8591	-3.65538	5e-05	0.00197765	yes
XLOC_005563	XLOC_005563	CG34234,fdl	2R:12474423-12507333	Wild Type	ZnF2 Mutant	OK	26.9726	7.57578	-1.83203	-2.84393	5e-05	0.00197765	yes
XLOC_003407	XLOC_003407	Tsp42Ee	2R:7012253-7018362	Wild Type	ZnF2 Mutant	OK	131.024	36.9444	-1.8264	-3.65648	5e-05	0.00197765	yes
XLOC_001100	XLOC_001100	CG33090	2L:14334157-14345795	Wild Type	ZnF2 Mutant	OK	12.8235	3.63067	-1.82048	-2.44424	5e-05	0.00197765	yes
XLOC_011733	XLOC_011733	CG11880	3R:29123369-29128247	Wild Type	ZnF2 Mutant	OK	19.6059	5.66832	-1.79029	-2.8538	5e-05	0.00197765	yes
XLOC_012546	XLOC_012546	Vha55	3R:12623761-12627829	Wild Type	ZnF2 Mutant	OK	61.2843	18.1441	-1.75602	-3.0975	5e-05	0.00197765	yes
XLOC_007365	XLOC_007365	CG8177	3L:9763543-9786466	Wild Type	ZnF2 Mutant	OK	31.5437	9.36755	-1.75161	-2.83068	5e-05	0.00197765	yes
XLOC_000425	XLOC_000425	CG18269	2L:5551837-5552756	Wild Type	ZnF2 Mutant	OK	115.135	34.2702	-1.7483	-2.73258	5e-05	0.00197765	yes
XLOC_000988	XLOC_000988	MRP	2L:12713275-12744807	Wild Type	ZnF2 Mutant	OK	109.613	32.7249	-1.74396	-3.70625	5e-05	0.00197765	yes
XLOC_013828	XLOC_013828	dco	3R:31054084-31061210	Wild Type	ZnF2 Mutant	OK	245.33	73.5517	-1.7379	-4.50801	5e-05	0.00197765	yes
XLOC_005082	XLOC_005082	CG3409	2R:6699694-6715892	Wild Type	ZnF2 Mutant	OK	13.2943	4.015	-1.72733	-2.7594	5e-05	0.00197765	yes
XLOC_000445	XLOC_000445	CG11034	2L:5805394-5809063	Wild Type	ZnF2 Mutant	OK	31.0768	9.48351	-1.71235	-2.78933	5e-05	0.00197765	yes
XLOC_007324	XLOC_007324	Hsp27	3L:9384062-9386463	Wild Type	ZnF2 Mutant	OK	96.3233	29.4261	-1.71079	-3.06982	5e-05	0.00197765	yes
XLOC_008502	XLOC_008502	CG5704	3L:2169552-2170971	Wild Type	ZnF2 Mutant	OK	61.4774	18.8576	-1.70491	-2.86457	5e-05	0.00197765	yes
XLOC_010575	XLOC_010575	CG5538,Desat1	3R:12439599-12449046	Wild Type	ZnF2 Mutant	OK	37.3292	11.873	-1.65262	-2.67443	5e-05	0.00197765	yes
XLOC_009695	XLOC_009695	CG9231	3L:19585092-19586003	Wild Type	ZnF2 Mutant	OK	133.817	43.4134	-1.62405	-2.88668	5e-05	0.00197765	yes
XLOC_000160	XLOC_000160	GlyP	2L:2130812-2137296	Wild Type	ZnF2 Mutant	OK	75.6165	24.8915	-1.60305	-3.3293	5e-05	0.00197765	yes
XLOC_008976	XLOC_008976	smg	3L:8990316-8997989	Wild Type	ZnF2 Mutant	OK	238.569	79.7043	-1.58168	-4.06369	5e-05	0.00197765	yes
XLOC_013465	XLOC_013465	LpR2	3R:25698726-25740465	Wild Type	ZnF2 Mutant	OK	48.1223	16.4845	-1.54559	-3.02567	5e-05	0.00197765	yes
XLOC_004097	XLOC_004097	GalNAc-T1	2R:15511709-15515597	Wild Type	ZnF2 Mutant	OK	42.0363	14.4493	-1.54064	-2.75921	5e-05	0.00197765	yes
XLOC_011910	XLOC_011910	faf	3R:31777019-31793907	Wild Type	ZnF2 Mutant	OK	52.2276	18.1098	-1.52804	-3.75088	5e-05	0.00197765	yes
XLOC_008674	XLOC_008674	CG15876	3L:4692782-4796253	Wild Type	ZnF2 Mutant	OK	678.799	237.877	-1.51277	-2.94389	5e-05	0.00197765	yes
XLOC_004541	XLOC_004541	Hsl	2R:20257649-20261726	Wild Type	ZnF2 Mutant	OK	71.6521	25.3585	-1.49854	-3.13696	5e-05	0.00197765	yes
XLOC_004138	XLOC_004138	spin	2R:16124980-16138238	Wild Type	ZnF2 Mutant	OK	49.2378	17.4306	-1.49815	-2.93666	5e-05	0.00197765	yes
XLOC_012702	XLOC_012702	CG7530	3R:14724759-14731509	Wild Type	ZnF2 Mutant	OK	70.8652	25.2457	-1.48904	-2.62121	5e-05	0.00197765	yes
XLOC_002409	XLOC_002409	CR18854	2L:9782383-9790745	Wild Type	ZnF2 Mutant	OK	63.4232	22.9551	-1.46619	-2.96251	5e-05	0.00197765	yes
XLOC_000464	XLOC_000464	ifc	2L:5986347-5988854	Wild Type	ZnF2 Mutant	OK	98.0357	35.7044	-1.45721	-2.98004	5e-05	0.00197765	yes
XLOC_005708	XLOC_005708	phyl	2R:14427335-14432337	Wild Type	ZnF2 Mutant	OK	57.2863	21.411	-1.41984	-2.64297	5e-05	0.00197765	yes
XLOC_010785	XLOC_010785	alpha-Man-IIb	3R:15804247-15832632	Wild Type	ZnF2 Mutant	OK	52.9997	19.819	-1.4191	-3.13112	5e-05	0.00197765	yes
XLOC_006270	XLOC_006270	rig	2R:20633875-20640681	Wild Type	ZnF2 Mutant	OK	25.0812	9.39344	-1.41688	-2.55348	5e-05	0.00197765	yes
XLOC_000169	XLOC_000169	papi	2L:2220747-2225544	Wild Type	ZnF2 Mutant	OK	37.2482	14.0141	-1.41029	-2.48525	5e-05	0.00197765	yes
XLOC_005317	XLOC_005317	ced-6	2R:9434668-9444937	Wild Type	ZnF2 Mutant	OK	98.1832	38.142	-1.3641	-2.76417	5e-05	0.00197765	yes
XLOC_000809	XLOC_000809	pim	2L:10362988-10364092	Wild Type	ZnF2 Mutant	OK	162.634	63.4139	-1.35876	-2.58294	5e-05	0.00197765	yes
XLOC_007173	XLOC_007173	Sec63	3L:7360560-7364366	Wild Type	ZnF2 Mutant	OK	50.6788	19.9913	-1.34201	-2.68156	5e-05	0.00197765	yes
XLOC_008852	XLOC_008852	pst	3L:7357274-7360263	Wild Type	ZnF2 Mutant	OK	59.1512	23.3819	-1.33901	-2.66848	5e-05	0.00197765	yes
XLOC_008271	XLOC_008271	SPoCk	3L:22749443-22787631	Wild Type	ZnF2 Mutant	OK	70.3416	27.8598	-1.33619	-2.9958	5e-05	0.00197765	yes
XLOC_012696	XLOC_012696	put	3R:14619029-14625703	Wild Type	ZnF2 Mutant	OK	126.078	50.08	-1.33201	-3.20724	5e-05	0.00197765	yes
XLOC_013032	XLOC_013032	mira	3R:19929276-20008512	Wild Type	ZnF2 Mutant	OK	258.482	102.841	-1.32965	-2.97645	5e-05	0.00197765	yes
XLOC_006846	XLOC_006846	CG8960	3L:2197012-2198089	Wild Type	ZnF2 Mutant	OK	1063.93	425.73	-1.32139	-3.53767	5e-05	0.00197765	yes
XLOC_005646	XLOC_005646	bbc	2R:13486633-13494862	Wild Type	ZnF2 Mutant	OK	62.5458	25.1862	-1.31228	-2.47018	5e-05	0.00197765	yes
XLOC_009826	XLOC_009826	Ac78C	3L:21136446-21171930	Wild Type	ZnF2 Mutant	OK	67.5403	27.2578	-1.30908	-3.03728	5e-05	0.00197765	yes
XLOC_010379	XLOC_010379	CG8507	3R:9791482-9793098	Wild Type	ZnF2 Mutant	OK	196.567	80.16	-1.29407	-2.94799	5e-05	0.00197765	yes
XLOC_002782	XLOC_002782	mol	2L:14975746-14997559	Wild Type	ZnF2 Mutant	OK	149.927	62.4472	-1.26355	-2.9516	5e-05	0.00197765	yes
XLOC_001392	XLOC_001392	CG10492	2L:19054077-19058821	Wild Type	ZnF2 Mutant	OK	116.408	49.0819	-1.24593	-3.14465	5e-05	0.00197765	yes
XLOC_007676	XLOC_007676	dlp	3L:14632600-14671609	Wild Type	ZnF2 Mutant	OK	53.035	22.3966	-1.24366	-2.71991	5e-05	0.00197765	yes
XLOC_008643	XLOC_008643	srw	3L:4282955-4283478	Wild Type	ZnF2 Mutant	OK	257.505	109.178	-1.23792	-2.39314	5e-05	0.00197765	yes
XLOC_013508	XLOC_013508	Ald	3R:26254068-26261591	Wild Type	ZnF2 Mutant	OK	353.665	155.333	-1.18702	-2.91421	5e-05	0.00197765	yes
XLOC_009633	XLOC_009633	CR45939,ftz-f1	3L:18750606-18801312	Wild Type	ZnF2 Mutant	OK	64.0924	28.258	-1.1815	-2.60294	5e-05	0.00197765	yes
XLOC_011592	XLOC_011592	Tl	3R:26799040-26842403	Wild Type	ZnF2 Mutant	OK	219.877	97.912	-1.16714	-3.44051	5e-05	0.00197765	yes
XLOC_003375	XLOC_003375	sced	2R:6657325-6660624	Wild Type	ZnF2 Mutant	OK	52.2343	23.4882	-1.15306	-2.2831	5e-05	0.00197765	yes
XLOC_011213	XLOC_011213	SKIP	3R:22133829-22296126	Wild Type	ZnF2 Mutant	OK	65.4204	29.5918	-1.14454	-2.65075	5e-05	0.00197765	yes
XLOC_008522	XLOC_008522	Spn	3L:2505244-2554292	Wild Type	ZnF2 Mutant	OK	46.7092	21.3162	-1.13176	-2.6135	5e-05	0.00197765	yes
XLOC_002230	XLOC_002230	CG4497	2L:7190430-7194588	Wild Type	ZnF2 Mutant	OK	72.1297	32.9771	-1.12913	-2.38732	5e-05	0.00197765	yes
XLOC_012289	XLOC_012289	pum	3R:9066342-9237682	Wild Type	ZnF2 Mutant	OK	84.995	38.9674	-1.12511	-2.74671	5e-05	0.00197765	yes
XLOC_012282	XLOC_012282	CG11984	3R:9010281-9014909	Wild Type	ZnF2 Mutant	OK	181.31	83.2631	-1.12271	-2.74692	5e-05	0.00197765	yes
XLOC_006442	XLOC_006442	CG2852	2R:22644645-22646344	Wild Type	ZnF2 Mutant	OK	460.114	219.435	-1.0682	-2.67138	5e-05	0.00197765	yes
XLOC_012272	XLOC_012272	CG9821,CG9837	3R:8807678-8821098	Wild Type	ZnF2 Mutant	OK	148.661	71.5921	-1.05416	-2.50644	5e-05	0.00197765	yes
XLOC_006459	XLOC_006459	CycB	2R:22803520-22806948	Wild Type	ZnF2 Mutant	OK	687.154	358.331	-0.939342	-3.01508	5e-05	0.00197765	yes
XLOC_000494	XLOC_000494	Cpr	2L:6338835-6346280	Wild Type	ZnF2 Mutant	OK	235.295	122.902	-0.936964	-2.54707	5e-05	0.00197765	yes
XLOC_004765	XLOC_004765	blw	2R:22799098-22802180	Wild Type	ZnF2 Mutant	OK	514.225	292.584	-0.813548	-2.50508	5e-05	0.00197765	yes
XLOC_005323	XLOC_005323	Not1	2R:9566145-9584545	Wild Type	ZnF2 Mutant	OK	143.56	81.7856	-0.811733	-2.45345	5e-05	0.00197765	yes
XLOC_006250	XLOC_006250	CG13427	2R:20538876-20539316	Wild Type	ZnF2 Mutant	OK	3055.1	5627.3	0.881222	2.7555	5e-05	0.00197765	yes
XLOC_006862	XLOC_006862	CG45186	3L:2377654-2499226	Wild Type	ZnF2 Mutant	OK	180.214	341.43	0.921876	2.55201	5e-05	0.00197765	yes
XLOC_009969	XLOC_009969	CG12581	3R:4174631-4186751	Wild Type	ZnF2 Mutant	OK	71.2255	137.045	0.944185	2.37386	5e-05	0.00197765	yes
XLOC_012528	XLOC_012528	CG10035	3R:12380868-12382691	Wild Type	ZnF2 Mutant	OK	1419.12	2740.55	0.949474	2.9728	5e-05	0.00197765	yes
XLOC_010160	XLOC_010160	ftz	3R:6864323-6866244	Wild Type	ZnF2 Mutant	OK	108.616	211.209	0.959433	2.38493	5e-05	0.00197765	yes
XLOC_010017	XLOC_010017	opa	3R:4852812-4869979	Wild Type	ZnF2 Mutant	OK	62.006	129.959	1.06758	2.5067	5e-05	0.00197765	yes
XLOC_003701	XLOC_003701	RanBPM	2R:10429707-10436581	Wild Type	ZnF2 Mutant	OK	20.5693	43.3356	1.07506	2.22059	5e-05	0.00197765	yes
XLOC_003902	XLOC_003902	sca	2R:12780540-12802010	Wild Type	ZnF2 Mutant	OK	51.3231	110.147	1.10175	2.60269	5e-05	0.00197765	yes
XLOC_005417	XLOC_005417	wde	2R:10800419-10808938	Wild Type	ZnF2 Mutant	OK	18.2218	39.7498	1.12528	2.46589	5e-05	0.00197765	yes
XLOC_004529	XLOC_004529	18w	2R:20111510-20116932	Wild Type	ZnF2 Mutant	OK	20.7051	46.7605	1.1753	2.62386	5e-05	0.00197765	yes
XLOC_011460	XLOC_011460	dan	3R:25169564-25193776	Wild Type	ZnF2 Mutant	OK	43.3984	99.4747	1.19669	2.61524	5e-05	0.00197765	yes
XLOC_000903	XLOC_000903	CG43355,sala	2L:11484706-11486949	Wild Type	ZnF2 Mutant	OK	711.999	1634.61	1.199	3.4508	5e-05	0.00197765	yes
XLOC_013669	XLOC_013669	Slbp	3R:29152073-29153266	Wild Type	ZnF2 Mutant	OK	89.6075	207.193	1.20928	2.63053	5e-05	0.00197765	yes
XLOC_009903	XLOC_009903	Hem	3L:22284353-22288195	Wild Type	ZnF2 Mutant	OK	8.51982	20.0104	1.23185	2.12593	5e-05	0.00197765	yes
XLOC_000829	XLOC_000829	LM408	2L:10457657-10462472	Wild Type	ZnF2 Mutant	OK	16.6368	39.4463	1.24552	2.48555	5e-05	0.00197765	yes
XLOC_003074	XLOC_003074	spi	2L:19567899-19577315	Wild Type	ZnF2 Mutant	OK	48.042	116.094	1.27292	2.58212	5e-05	0.00197765	yes
XLOC_011325	XLOC_011325	mbc	3R:23781764-23801634	Wild Type	ZnF2 Mutant	OK	11.5443	28.0447	1.28055	2.63867	5e-05	0.00197765	yes
XLOC_001776	XLOC_001776	CR44898,lea	2L:1380082-1420453	Wild Type	ZnF2 Mutant	OK	18.4514	45.0887	1.28903	2.71361	5e-05	0.00197765	yes
XLOC_000680	XLOC_000680	SoxN	2L:8825644-8829670	Wild Type	ZnF2 Mutant	OK	25.2676	62.8313	1.3142	2.89417	5e-05	0.00197765	yes
XLOC_010805	XLOC_010805	msps	3R:16050800-16067594	Wild Type	ZnF2 Mutant	OK	6.6192	16.6297	1.32903	2.54946	5e-05	0.00197765	yes
XLOC_004716	XLOC_004716	Gp150	2R:22317661-22329720	Wild Type	ZnF2 Mutant	OK	45.9585	116.12	1.33721	3.22372	5e-05	0.00197765	yes
XLOC_002218	XLOC_002218	uif	2L:6972827-7010359	Wild Type	ZnF2 Mutant	OK	7.63515	19.6554	1.36419	2.70586	5e-05	0.00197765	yes
XLOC_004663	XLOC_004663	mahj	2R:21625029-21634362	Wild Type	ZnF2 Mutant	OK	6.55846	17.1945	1.39052	2.43499	5e-05	0.00197765	yes
XLOC_004232	XLOC_004232	RhoGEF2	2R:17027189-17044653	Wild Type	ZnF2 Mutant	OK	5.50774	14.4778	1.39431	2.55151	5e-05	0.00197765	yes
XLOC_006704	XLOC_006704	CG33229,CR42862	3L:223851-230964	Wild Type	ZnF2 Mutant	OK	105.444	284.46	1.43175	3.08764	5e-05	0.00197765	yes
XLOC_002059	XLOC_002059	Rpn11	2L:5058403-5059790	Wild Type	ZnF2 Mutant	OK	20.9978	57.1677	1.44496	2.33633	5e-05	0.00197765	yes
XLOC_005397	XLOC_005397	CG11825	2R:10420413-10423650	Wild Type	ZnF2 Mutant	OK	70.8864	197.216	1.4762	2.68725	5e-05	0.00197765	yes
XLOC_005260	XLOC_005260	CG14767	2R:8718016-8723839	Wild Type	ZnF2 Mutant	OK	15.158	42.8116	1.49792	2.61984	5e-05	0.00197765	yes
XLOC_006322	XLOC_006322	ASPP	2R:21217855-21251150	Wild Type	ZnF2 Mutant	OK	18.9111	53.414	1.49798	3.01906	5e-05	0.00197765	yes
XLOC_004029	XLOC_004029	Sec61beta	2R:14618770-14619681	Wild Type	ZnF2 Mutant	OK	39.9177	120.755	1.59698	2.718	5e-05	0.00197765	yes
XLOC_007081	XLOC_007081	CG18586,CG5568	3L:5871500-5875466	Wild Type	ZnF2 Mutant	OK	19.2068	59.1798	1.62349	2.87395	5e-05	0.00197765	yes
XLOC_007344	XLOC_007344	LanB2	3L:9614913-9623980	Wild Type	ZnF2 Mutant	OK	6.4324	19.8698	1.62715	2.9004	5e-05	0.00197765	yes
XLOC_012392	XLOC_012392	hth	3R:10507560-10645773	Wild Type	ZnF2 Mutant	OK	10.6824	34.0803	1.6737	2.75967	5e-05	0.00197765	yes
XLOC_011459	XLOC_011459	danr	3R:25138071-25139903	Wild Type	ZnF2 Mutant	OK	19.0975	66.4683	1.79928	3.09617	5e-05	0.00197765	yes
XLOC_010768	XLOC_010768	pxb	3R:15666182-15690513	Wild Type	ZnF2 Mutant	OK	6.18675	21.9254	1.82535	2.89527	5e-05	0.00197765	yes
XLOC_008521	XLOC_008521	CG16758	3L:2499371-2503606	Wild Type	ZnF2 Mutant	OK	8.60679	31.1129	1.85397	2.61681	5e-05	0.00197765	yes
XLOC_004630	XLOC_004630	tud	2R:21183321-21192913	Wild Type	ZnF2 Mutant	OK	2.18582	8.25387	1.9169	2.9356	5e-05	0.00197765	yes
XLOC_010946	XLOC_010946	tinc	3R:17811540-17872507	Wild Type	ZnF2 Mutant	OK	2.66796	10.3306	1.95311	2.86829	5e-05	0.00197765	yes
XLOC_007209	XLOC_007209	CG8209	3L:7976405-7978650	Wild Type	ZnF2 Mutant	OK	41.3854	165.487	1.99952	3.66013	5e-05	0.00197765	yes
XLOC_001951	XLOC_001951	Spindly	2L:3525130-3530317	Wild Type	ZnF2 Mutant	OK	3.38491	13.5771	2.00398	2.57918	5e-05	0.00197765	yes
XLOC_001645	XLOC_001645	tsh	2L:21828592-21837011	Wild Type	ZnF2 Mutant	OK	3.04162	12.2507	2.00995	2.80369	5e-05	0.00197765	yes
XLOC_009517	XLOC_009517	CG3764,mir-2500	3L:16994716-17012565	Wild Type	ZnF2 Mutant	OK	4.5505	18.7646	2.04391	3.29361	5e-05	0.00197765	yes
XLOC_006828	XLOC_006828	Patj	3L:1798802-1802856	Wild Type	ZnF2 Mutant	OK	16.8635	72.1147	2.09639	3.75853	5e-05	0.00197765	yes
XLOC_010020	XLOC_010020	Cdep	3R:4910551-4945576	Wild Type	ZnF2 Mutant	OK	2.02111	8.89284	2.1375	2.74329	5e-05	0.00197765	yes
XLOC_002985	XLOC_002985	CG10283	2L:18455716-18484513	Wild Type	ZnF2 Mutant	OK	7.78521	36.0885	2.21273	3.49662	5e-05	0.00197765	yes
XLOC_000537	XLOC_000537	SA	2L:6950420-6956950	Wild Type	ZnF2 Mutant	OK	3.24513	15.3365	2.24062	2.9961	5e-05	0.00197765	yes
XLOC_003700	XLOC_003700	Prx2540-1	2R:10424435-10425471	Wild Type	ZnF2 Mutant	OK	8.63986	43.8411	2.3432	2.79878	5e-05	0.00197765	yes
XLOC_000045	XLOC_000045	CG4133	2L:455530-458745	Wild Type	ZnF2 Mutant	OK	1.99335	10.5939	2.40997	3.02779	5e-05	0.00197765	yes
XLOC_011731	XLOC_011731	CG11876	3R:29113070-29116197	Wild Type	ZnF2 Mutant	OK	20.8662	113.341	2.44144	4.10059	5e-05	0.00197765	yes
XLOC_011652	XLOC_011652	CG5590	3R:27677521-27679013	Wild Type	ZnF2 Mutant	OK	20.4112	116.857	2.51732	4.69142	5e-05	0.00197765	yes
XLOC_005126	XLOC_005126	Dscam1	2R:7317923-7381899	Wild Type	ZnF2 Mutant	OK	1.5398	9.05275	2.55562	3.34928	5e-05	0.00197765	yes
XLOC_001096	XLOC_001096	wb	2L:14263026-14328262	Wild Type	ZnF2 Mutant	OK	0.624838	3.88971	2.63811	3.18668	5e-05	0.00197765	yes
XLOC_012124	XLOC_012124	Antp	3R:6896252-6999228	Wild Type	ZnF2 Mutant	OK	0.644647	7.1788	3.47716	3.35139	5e-05	0.00197765	yes
XLOC_012499	XLOC_012499	mfas	3R:11984861-11993315	Wild Type	ZnF2 Mutant	OK	2.36872	26.4712	3.48224	3.70099	5e-05	0.00197765	yes
XLOC_006037	XLOC_006037	edl	2R:18667526-18673536	Wild Type	ZnF2 Mutant	OK	1.97844	22.3446	3.49749	3.61571	5e-05	0.00197765	yes
XLOC_004978	XLOC_004978	gsb	2R:25061963-25064643	Wild Type	ZnF2 Mutant	OK	1.10443	13.224	3.5818	3.09486	5e-05	0.00197765	yes
XLOC_003051	XLOC_003051	gammaTub37C	2L:19183862-19185726	Wild Type	ZnF2 Mutant	OK	1.53463	120.738	6.29785	5.8964	5e-05	0.00197765	yes
XLOC_003747	XLOC_003747	CR30029	2R:11246104-11246654	Wild Type	ZnF2 Mutant	OK	1.8459	0	-inf	-nan	5e-05	0.00197765	yes
XLOC_003762	XLOC_003762	betaTry	2R:11346324-11347395	Wild Type	ZnF2 Mutant	OK	1.11862	0	-inf	-nan	5e-05	0.00197765	yes
XLOC_005444	XLOC_005444	CG13215	2R:11239493-11240114	Wild Type	ZnF2 Mutant	OK	0.599072	0	-inf	-nan	5e-05	0.00197765	yes
XLOC_005926	XLOC_005926	CG30457	2R:17160121-17160829	Wild Type	ZnF2 Mutant	OK	1.79533	0	-inf	-nan	5e-05	0.00197765	yes
XLOC_005994	XLOC_005994	CG5767	2R:18046385-18047484	Wild Type	ZnF2 Mutant	OK	1.43983	0	-inf	-nan	5e-05	0.00197765	yes
XLOC_007093	XLOC_007093	Jon65Aiv	3L:6039154-6040135	Wild Type	ZnF2 Mutant	OK	1.42004	0	-inf	-nan	5e-05	0.00197765	yes
XLOC_007540	XLOC_007540	CG11529	3L:12197790-12199030	Wild Type	ZnF2 Mutant	OK	1.22922	0	-inf	-nan	5e-05	0.00197765	yes
XLOC_008654	XLOC_008654	CG11345	3L:4457176-4458163	Wild Type	ZnF2 Mutant	OK	0.707602	0	-inf	-nan	5e-05	0.00197765	yes
XLOC_008760	XLOC_008760	Lcp65Ag3	3L:6130385-6130989	Wild Type	ZnF2 Mutant	OK	4.97709	0	-inf	-nan	5e-05	0.00197765	yes
XLOC_008762	XLOC_008762	Lcp65Ag2	3L:6132989-6133593	Wild Type	ZnF2 Mutant	OK	2.45738	0	-inf	-nan	5e-05	0.00197765	yes
XLOC_009540	XLOC_009540	CG13731	3L:17383635-17388956	Wild Type	ZnF2 Mutant	OK	2.17436	0	-inf	-nan	5e-05	0.00197765	yes
XLOC_011182	XLOC_011182	CG31198	3R:21754323-21757758	Wild Type	ZnF2 Mutant	OK	0.780033	0	-inf	-nan	5e-05	0.00197765	yes
XLOC_011987	XLOC_011987	CG43131	3R:5108677-5109178	Wild Type	ZnF2 Mutant	OK	6.35962	0	-inf	-nan	5e-05	0.00197765	yes
XLOC_012723	XLOC_012723	Mf	3R:15150374-15196210	Wild Type	ZnF2 Mutant	OK	4.92171	0	-inf	-nan	5e-05	0.00197765	yes
XLOC_013278	XLOC_013278	CG10182	3R:23587119-23589819	Wild Type	ZnF2 Mutant	OK	0.474069	0	-inf	-nan	5e-05	0.00197765	yes
XLOC_001733	XLOC_001733	lectin-21Cb	2L:620297-621201	Wild Type	ZnF2 Mutant	OK	0	0.552968	inf	-nan	5e-05	0.00197765	yes
XLOC_001978	XLOC_001978	CR45450	2L:3856477-3857172	Wild Type	ZnF2 Mutant	OK	0	1.24684	inf	-nan	5e-05	0.00197765	yes
XLOC_003197	XLOC_003197	CR44785	2L:21319599-21320320	Wild Type	ZnF2 Mutant	OK	0	0.663313	inf	-nan	5e-05	0.00197765	yes
XLOC_004010	XLOC_004010	CG34442	2R:14366797-14367874	Wild Type	ZnF2 Mutant	OK	0	0.791616	inf	-nan	5e-05	0.00197765	yes
XLOC_005435	XLOC_005435	Cyp12d1-d	2R:11123657-11125647	Wild Type	ZnF2 Mutant	OK	0	0.70001	inf	-nan	5e-05	0.00197765	yes
XLOC_007227	XLOC_007227	CG13679	3L:8202791-8203345	Wild Type	ZnF2 Mutant	OK	0	1.71469	inf	-nan	5e-05	0.00197765	yes
XLOC_012498	XLOC_012498	CG3397	3R:11983097-11984541	Wild Type	ZnF2 Mutant	OK	0	1.20028	inf	-nan	5e-05	0.00197765	yes
XLOC_003773	XLOC_003773	CG7777	2R:11436242-11442216	Wild Type	ZnF2 Mutant	OK	18.949	3.04099	-2.63951	-2.77696	0.0001	0.00352239	yes
XLOC_010523	XLOC_010523	GC1,GC2	3R:11967707-11974910	Wild Type	ZnF2 Mutant	OK	56.6996	18.0814	-1.64883	-2.45323	0.0001	0.00352239	yes
XLOC_008509	XLOC_008509	oxt	3L:2257455-2262664	Wild Type	ZnF2 Mutant	OK	59.2597	22.2623	-1.41245	-2.45268	0.0001	0.00352239	yes
XLOC_013366	XLOC_013366	CG5789	3R:24530575-24543914	Wild Type	ZnF2 Mutant	OK	66.958	26.607	-1.33145	-2.54664	0.0001	0.00352239	yes
XLOC_012746	XLOC_012746	Surf4	3R:15343652-15346176	Wild Type	ZnF2 Mutant	OK	48.5976	20.6753	-1.23298	-2.15969	0.0001	0.00352239	yes
XLOC_010309	XLOC_010309	skap	3R:8938682-8945020	Wild Type	ZnF2 Mutant	OK	209.732	94.2231	-1.1544	-2.52572	0.0001	0.00352239	yes
XLOC_001671	XLOC_001671	CG17018	2L:22308754-22368796	Wild Type	ZnF2 Mutant	OK	74.0259	33.5851	-1.14021	-2.4995	0.0001	0.00352239	yes
XLOC_013688	XLOC_013688	Trc8	3R:29499024-29503797	Wild Type	ZnF2 Mutant	OK	34.7791	15.8095	-1.13743	-2.19452	0.0001	0.00352239	yes
XLOC_007857	XLOC_007857	nudC	3L:16787572-16829074	Wild Type	ZnF2 Mutant	OK	280.094	145.058	-0.949278	-2.32754	0.0001	0.00352239	yes
XLOC_009621	XLOC_009621	term	3L:18592302-18593771	Wild Type	ZnF2 Mutant	OK	457.884	774.71	0.758675	2.30397	0.0001	0.00352239	yes
XLOC_005511	XLOC_005511	RnrS	2R:11983144-11985393	Wild Type	ZnF2 Mutant	OK	62.8095	131.185	1.06255	2.28121	0.0001	0.00352239	yes
XLOC_012674	XLOC_012674	trx	3R:14261390-14286903	Wild Type	ZnF2 Mutant	OK	9.56276	20.8505	1.12459	2.47348	0.0001	0.00352239	yes
XLOC_006727	XLOC_006727	MED14	3L:593245-604008	Wild Type	ZnF2 Mutant	OK	9.53639	21.9972	1.2058	2.34818	0.0001	0.00352239	yes
XLOC_006518	XLOC_006518	CG3520	2R:23396769-23402309	Wild Type	ZnF2 Mutant	OK	10.0685	24.6082	1.28929	2.42181	0.0001	0.00352239	yes
XLOC_007603	XLOC_007603	trn	3L:13114270-13118077	Wild Type	ZnF2 Mutant	OK	14.4733	36.3283	1.3277	2.41008	0.0001	0.00352239	yes
XLOC_004849	XLOC_004849	gbb	2R:23851561-23853247	Wild Type	ZnF2 Mutant	OK	18.1385	51.8805	1.51613	2.56383	0.0001	0.00352239	yes
XLOC_012300	XLOC_012300	FER	3R:9365397-9394546	Wild Type	ZnF2 Mutant	OK	9.92096	28.7009	1.53254	2.70218	0.0001	0.00352239	yes
XLOC_009412	XLOC_009412	comm	3L:15721510-15728430	Wild Type	ZnF2 Mutant	OK	12.6691	38.3322	1.59724	2.49241	0.0001	0.00352239	yes
XLOC_003652	XLOC_003652	CG1671	2R:9848060-9850642	Wild Type	ZnF2 Mutant	OK	6.78887	20.6785	1.60689	2.36409	0.0001	0.00352239	yes
XLOC_001717	XLOC_001717	AP-2alpha	2L:408029-414777	Wild Type	ZnF2 Mutant	OK	2.02908	8.11558	1.99987	2.56432	0.0001	0.00352239	yes
XLOC_000705	XLOC_000705	CG32982	2L:9125736-9163721	Wild Type	ZnF2 Mutant	OK	4.49972	23.5844	2.38993	3.21297	0.0001	0.00352239	yes
XLOC_004851	XLOC_004851	ken	2R:23870272-23877442	Wild Type	ZnF2 Mutant	OK	1.2705	7.75956	2.61058	2.81727	0.0001	0.00352239	yes
XLOC_005575	XLOC_005575	CG8778	2R:12651300-12652487	Wild Type	ZnF2 Mutant	OK	12.9851	2.6125	-2.31336	-2.25998	0.00015	0.00472	yes
XLOC_004326	XLOC_004326	CG5002	2R:17750292-17753214	Wild Type	ZnF2 Mutant	OK	14.6823	3.90879	-1.90928	-2.35926	0.00015	0.00472	yes
XLOC_004730	XLOC_004730	CG4752	2R:22478378-22483054	Wild Type	ZnF2 Mutant	OK	10.6719	2.91701	-1.87126	-2.64976	0.00015	0.00472	yes
XLOC_009251	XLOC_009251	MICAL-like	3L:13011975-13015332	Wild Type	ZnF2 Mutant	OK	16.9811	5.78175	-1.55435	-2.32192	0.00015	0.00472	yes
XLOC_011308	XLOC_011308	GILT3	3R:23677357-23678421	Wild Type	ZnF2 Mutant	OK	70.6959	24.9712	-1.50136	-2.3344	0.00015	0.00472	yes
XLOC_012529	XLOC_012529	CG10096,CG10097,Cyp9f3Psi,lig3	3R:12386248-12402902	Wild Type	ZnF2 Mutant	OK	26.8792	10.4631	-1.36118	-2.32899	0.00015	0.00472	yes
XLOC_009636	XLOC_009636	Indy	3L:18828631-18846267	Wild Type	ZnF2 Mutant	OK	64.2378	28.787	-1.158	-2.36229	0.00015	0.00472	yes
XLOC_009853	XLOC_009853	Glg1,Hr78	3L:21494018-21507538	Wild Type	ZnF2 Mutant	OK	62.5896	32.7882	-0.932747	-2.17769	0.00015	0.00472	yes
XLOC_012012	XLOC_012012	PEK	3R:5458562-5464753	Wild Type	ZnF2 Mutant	OK	152.425	87.5707	-0.799583	-2.24076	0.00015	0.00472	yes
XLOC_001226	XLOC_001226	CG4440	2L:16329924-16330521	Wild Type	ZnF2 Mutant	OK	1864.73	3244.16	0.798875	2.314	0.00015	0.00472	yes
XLOC_006457	XLOC_006457	jbug	2R:22717320-22740459	Wild Type	ZnF2 Mutant	OK	21.9543	42.1394	0.940667	2.02595	0.00015	0.00472	yes
XLOC_006565	XLOC_006565	TBPH	2R:23859066-23862593	Wild Type	ZnF2 Mutant	OK	29.4761	64.3432	1.12624	2.21263	0.00015	0.00472	yes
XLOC_002609	XLOC_002609	prd	2L:12082994-12086413	Wild Type	ZnF2 Mutant	OK	39.4587	87.1119	1.14253	2.46959	0.00015	0.00472	yes
XLOC_000891	XLOC_000891	CG4751	2L:11130736-11136003	Wild Type	ZnF2 Mutant	OK	15.0852	33.3359	1.14394	2.3759	0.00015	0.00472	yes
XLOC_003068	XLOC_003068	CG10188	2L:19502334-19508764	Wild Type	ZnF2 Mutant	OK	7.53963	18.1879	1.27042	2.26901	0.00015	0.00472	yes
XLOC_007190	XLOC_007190	ltl	3L:7518996-7528013	Wild Type	ZnF2 Mutant	OK	10.7292	26.6584	1.31305	2.35596	0.00015	0.00472	yes
XLOC_004209	XLOC_004209	IntS8	2R:16850436-16855464	Wild Type	ZnF2 Mutant	OK	8.05956	21.5194	1.41687	2.31527	0.00015	0.00472	yes
XLOC_005715	XLOC_005715	RpI1	2R:14591202-14601216	Wild Type	ZnF2 Mutant	OK	3.32717	9.19314	1.46626	2.24888	0.00015	0.00472	yes
XLOC_009858	XLOC_009858	Wnk	3L:21543849-21554928	Wild Type	ZnF2 Mutant	OK	2.08616	6.06633	1.53997	2.36164	0.00015	0.00472	yes
XLOC_002984	XLOC_002984	bsf	2L:18449516-18454587	Wild Type	ZnF2 Mutant	OK	2.51876	9.03784	1.84327	2.61271	0.00015	0.00472	yes
XLOC_011793	XLOC_011793	CG15523	3R:29935977-29948207	Wild Type	ZnF2 Mutant	OK	0.584777	2.5229	2.10912	2.54951	0.00015	0.00472	yes
XLOC_007900	XLOC_007900	Oatp74D	3L:17487117-17511693	Wild Type	ZnF2 Mutant	OK	1.77323	8.52355	2.26507	2.76597	0.00015	0.00472	yes
XLOC_003561	XLOC_003561	RyR	2R:8860363-8888097	Wild Type	ZnF2 Mutant	OK	0.23817	1.60352	2.75118	2.75479	0.00015	0.00472	yes
XLOC_010006	XLOC_010006	5-HT2A	3R:4612869-4633304	Wild Type	ZnF2 Mutant	OK	0.799485	6.95378	3.12066	3.3216	0.00015	0.00472	yes
XLOC_004987	XLOC_004987	CG40498	2R:924635-951252	Wild Type	ZnF2 Mutant	OK	0.900569	0.0330208	-4.76939	-1.43775	0.0002	0.0057561	yes
XLOC_000987	XLOC_000987	CG6180	2L:12706798-12708680	Wild Type	ZnF2 Mutant	OK	35.4807	7.0725	-2.32674	-2.52078	0.0002	0.0057561	yes
XLOC_001170	XLOC_001170	lace	2L:15499126-15505018	Wild Type	ZnF2 Mutant	OK	19.7765	6.38067	-1.63201	-2.43429	0.0002	0.0057561	yes
XLOC_004099	XLOC_004099	CG30467	2R:15538174-15541363	Wild Type	ZnF2 Mutant	OK	67.6624	26.4438	-1.35542	-2.31741	0.0002	0.0057561	yes
XLOC_012177	XLOC_012177	alpha-Est1	3R:7545732-7549124	Wild Type	ZnF2 Mutant	OK	41.4044	16.4954	-1.32772	-2.35626	0.0002	0.0057561	yes
XLOC_007664	XLOC_007664	fz	3L:14274342-14368639	Wild Type	ZnF2 Mutant	OK	32.3953	14.4856	-1.16117	-2.29299	0.0002	0.0057561	yes
XLOC_009184	XLOC_009184	viaf	3L:11990735-11993179	Wild Type	ZnF2 Mutant	OK	104.366	47.1707	-1.14569	-2.19699	0.0002	0.0057561	yes
XLOC_004878	XLOC_004878	MAN1	2R:24033973-24036707	Wild Type	ZnF2 Mutant	OK	91.7476	43.4723	-1.07757	-2.32419	0.0002	0.0057561	yes
XLOC_002150	XLOC_002150	Pez	2L:6332880-6338671	Wild Type	ZnF2 Mutant	OK	56.0878	28.9858	-0.952341	-2.22363	0.0002	0.0057561	yes
XLOC_007777	XLOC_007777	ClC-c	3L:16090453-16097493	Wild Type	ZnF2 Mutant	OK	53.4952	27.8633	-0.941042	-2.06658	0.0002	0.0057561	yes
XLOC_003872	XLOC_003872	Lac	2R:12453189-12465630	Wild Type	ZnF2 Mutant	OK	294.196	503.444	0.775055	2.28706	0.0002	0.0057561	yes
XLOC_012507	XLOC_012507	CG4702	3R:12121582-12128201	Wild Type	ZnF2 Mutant	OK	50.6725	106.278	1.06857	2.20107	0.0002	0.0057561	yes
XLOC_000998	XLOC_000998	Tor	2L:13004479-13013197	Wild Type	ZnF2 Mutant	OK	4.82594	11.0169	1.19083	2.22412	0.0002	0.0057561	yes
XLOC_001459	XLOC_001459	nesd	2L:20093971-20096253	Wild Type	ZnF2 Mutant	OK	14.0173	36.8042	1.39266	2.30283	0.0002	0.0057561	yes
XLOC_004861	XLOC_004861	Galphas	2R:23942537-23946936	Wild Type	ZnF2 Mutant	OK	19.1982	50.7761	1.40318	2.44028	0.0002	0.0057561	yes
XLOC_004731	XLOC_004731	CG4554	2R:22483302-22492033	Wild Type	ZnF2 Mutant	OK	3.18193	8.45144	1.40929	2.31866	0.0002	0.0057561	yes
XLOC_009663	XLOC_009663	fz2	3L:19140974-19235373	Wild Type	ZnF2 Mutant	OK	4.04046	11.9477	1.56414	2.32131	0.0002	0.0057561	yes
XLOC_006336	XLOC_006336	cv-2	2R:21355014-21379464	Wild Type	ZnF2 Mutant	OK	3.90369	11.9858	1.61841	2.53215	0.0002	0.0057561	yes
XLOC_001218	XLOC_001218	pkaap	2L:16288289-16291195	Wild Type	ZnF2 Mutant	OK	3.63675	11.8532	1.70455	2.15178	0.0002	0.0057561	yes
XLOC_002991	XLOC_002991	Atac2	2L:18609575-18612249	Wild Type	ZnF2 Mutant	OK	3.64432	12.6636	1.79696	2.33782	0.0002	0.0057561	yes
XLOC_013065	XLOC_013065	CG4159	3R:20588710-20592671	Wild Type	ZnF2 Mutant	OK	9.92692	36.1911	1.86622	2.3405	0.0002	0.0057561	yes
XLOC_006669	XLOC_006669	Tina-1	2R:24940624-24942413	Wild Type	ZnF2 Mutant	OK	35.1639	10.0955	-1.80039	-2.33763	0.00025	0.00670455	yes
XLOC_011085	XLOC_011085	CG42668	3R:20309343-20324196	Wild Type	ZnF2 Mutant	OK	12.2975	4.29455	-1.51779	-2.13175	0.00025	0.00670455	yes
XLOC_007276	XLOC_007276	Fhos	3L:8753618-8798719	Wild Type	ZnF2 Mutant	OK	22.8434	8.24123	-1.47085	-2.50979	0.00025	0.00670455	yes
XLOC_000140	XLOC_000140	CG7337	2L:1884621-1944289	Wild Type	ZnF2 Mutant	OK	14.9206	5.52087	-1.43434	-2.4493	0.00025	0.00670455	yes
XLOC_012726	XLOC_012726	Spn88Ea	3R:15196597-15206447	Wild Type	ZnF2 Mutant	OK	125.966	55.4334	-1.1842	-2.26032	0.00025	0.00670455	yes
XLOC_008034	XLOC_008034	Deaf1	3L:19818173-19830686	Wild Type	ZnF2 Mutant	OK	54.6542	24.7136	-1.14503	-2.17979	0.00025	0.00670455	yes
XLOC_006575	XLOC_006575	Ca-P60A	2R:23925076-23935884	Wild Type	ZnF2 Mutant	OK	53.3466	26.4396	-1.0127	-2.15042	0.00025	0.00670455	yes
XLOC_000728	XLOC_000728	Oatp30B	2L:9521209-9540060	Wild Type	ZnF2 Mutant	OK	62.7283	34.4492	-0.864646	-2.12625	0.00025	0.00670455	yes
XLOC_012602	XLOC_012602	GILT1	3R:13397834-13401862	Wild Type	ZnF2 Mutant	OK	296.465	166.786	-0.829862	-2.03725	0.00025	0.00670455	yes
XLOC_005070	XLOC_005070	Vha16-1	2R:6625241-6633090	Wild Type	ZnF2 Mutant	OK	495.032	317.299	-0.641676	-2.03169	0.00025	0.00670455	yes
XLOC_003912	XLOC_003912	NAT1	2R:12915993-12923734	Wild Type	ZnF2 Mutant	OK	72.2312	123.741	0.776623	2.19991	0.00025	0.00670455	yes
XLOC_005957	XLOC_005957	RhoGAP54D	2R:17586424-17590884	Wild Type	ZnF2 Mutant	OK	16.5219	35.4958	1.10327	2.27884	0.00025	0.00670455	yes
XLOC_006555	XLOC_006555	Ssrp	2R:23806360-23809004	Wild Type	ZnF2 Mutant	OK	15.5157	36.1532	1.22039	2.2232	0.00025	0.00670455	yes
XLOC_009652	XLOC_009652	nkd	3L:19003740-19045449	Wild Type	ZnF2 Mutant	OK	10.8636	26.5968	1.29175	2.34627	0.00025	0.00670455	yes
XLOC_011625	XLOC_011625	DNApol-alpha73	3R:27239162-27241228	Wild Type	ZnF2 Mutant	OK	9.83756	25.175	1.35562	2.06756	0.00025	0.00670455	yes
XLOC_013316	XLOC_013316	Aats-glupro	3R:23952135-23958391	Wild Type	ZnF2 Mutant	OK	2.24764	7.32187	1.7038	2.10136	0.00025	0.00670455	yes
XLOC_011296	XLOC_011296	DNApol-epsilon255	3R:23348127-23355163	Wild Type	ZnF2 Mutant	OK	1.12127	3.95811	1.81968	2.33795	0.00025	0.00670455	yes
XLOC_007718	XLOC_007718	Toll-6	3L:15336691-15344315	Wild Type	ZnF2 Mutant	OK	0.483613	2.21541	2.19565	2.14049	0.00025	0.00670455	yes
XLOC_006433	XLOC_006433	dnr1	2R:22563151-22592964	Wild Type	ZnF2 Mutant	OK	7.12741	1.68931	-2.07694	-2.47391	0.0003	0.00778022	yes
XLOC_009597	XLOC_009597	CG44005	3L:18070299-18072123	Wild Type	ZnF2 Mutant	OK	63.8623	24.1304	-1.40411	-2.2402	0.0003	0.00778022	yes
XLOC_008626	XLOC_008626	mas	3L:4161665-4167464	Wild Type	ZnF2 Mutant	OK	29.2245	13.2712	-1.13889	-2.21194	0.0003	0.00778022	yes
XLOC_012595	XLOC_012595	poly	3R:13361815-13369278	Wild Type	ZnF2 Mutant	OK	169.869	81.704	-1.05594	-2.2354	0.0003	0.00778022	yes
XLOC_005903	XLOC_005903	ste24a	2R:17000243-17001941	Wild Type	ZnF2 Mutant	OK	100.333	50.3696	-0.994176	-2.10548	0.0003	0.00778022	yes
XLOC_012693	XLOC_012693	Cys	3R:14568961-14569871	Wild Type	ZnF2 Mutant	OK	820.842	447.27	-0.875958	-2.09573	0.0003	0.00778022	yes
XLOC_002456	XLOC_002456	CG5604	2L:10281942-10292365	Wild Type	ZnF2 Mutant	OK	48.5419	28.0775	-0.789816	-2.06785	0.0003	0.00778022	yes
XLOC_012700	XLOC_012700	Meltrin	3R:14664906-14697292	Wild Type	ZnF2 Mutant	OK	3.40589	9.53861	1.48575	2.1714	0.0003	0.00778022	yes
XLOC_012915	XLOC_012915	htl	3R:18045215-18052984	Wild Type	ZnF2 Mutant	OK	5.9576	17.4948	1.55412	2.3516	0.0003	0.00778022	yes
XLOC_004423	XLOC_004423	Mctp	2R:18761757-18774824	Wild Type	ZnF2 Mutant	OK	1.07848	0.0914455	-3.55994	-1.94985	0.00035	0.00857439	yes
XLOC_002904	XLOC_002904	CG6115	2L:16887108-16887966	Wild Type	ZnF2 Mutant	OK	112.086	48.1998	-1.21751	-2.08735	0.00035	0.00857439	yes
XLOC_006861	XLOC_006861	CG9004	3L:2373727-2377556	Wild Type	ZnF2 Mutant	OK	55.9147	26.8345	-1.05914	-2.08636	0.00035	0.00857439	yes
XLOC_000884	XLOC_000884	CG14915	2L:11071026-11071532	Wild Type	ZnF2 Mutant	OK	1802.08	1073.84	-0.746886	-2.11167	0.00035	0.00857439	yes
XLOC_011869	XLOC_011869	bnk	3R:31178388-31195762	Wild Type	ZnF2 Mutant	OK	1397.93	872.192	-0.680571	-2.11259	0.00035	0.00857439	yes
XLOC_004354	XLOC_004354	pAbp	2R:18140077-18147191	Wild Type	ZnF2 Mutant	OK	587.629	369.707	-0.668523	-2.099	0.00035	0.00857439	yes
XLOC_003921	XLOC_003921	Cap-G	2R:13133141-13142820	Wild Type	ZnF2 Mutant	OK	26.9494	51.0226	0.920885	2.10789	0.00035	0.00857439	yes
XLOC_001077	XLOC_001077	Ance	2L:13905644-13909212	Wild Type	ZnF2 Mutant	OK	41.1991	82.641	1.00425	2.11864	0.00035	0.00857439	yes
XLOC_003684	XLOC_003684	dmpd	2R:10117693-10121451	Wild Type	ZnF2 Mutant	OK	23.3356	51.6856	1.14723	2.22427	0.00035	0.00857439	yes
XLOC_006918	XLOC_006918	CG11505	3L:3224837-3236604	Wild Type	ZnF2 Mutant	OK	4.92386	11.2047	1.18624	2.15366	0.00035	0.00857439	yes
XLOC_005420	XLOC_005420	dgo	2R:10816036-10819884	Wild Type	ZnF2 Mutant	OK	5.24673	13.6036	1.3745	2.10254	0.00035	0.00857439	yes
XLOC_009784	XLOC_009784	knrl	3L:20597140-20620659	Wild Type	ZnF2 Mutant	OK	6.74792	18.7549	1.47475	2.21554	0.00035	0.00857439	yes
XLOC_007128	XLOC_007128	CG8270	3L:6488680-6491210	Wild Type	ZnF2 Mutant	OK	1.57125	6.24759	1.99139	1.93949	0.00035	0.00857439	yes
XLOC_011487	XLOC_011487	CG11902	3R:25335256-25340088	Wild Type	ZnF2 Mutant	OK	1.12792	4.60693	2.03015	2.38761	0.00035	0.00857439	yes
XLOC_000415	XLOC_000415	mid	2L:5461638-5467610	Wild Type	ZnF2 Mutant	OK	1.03592	6.53137	2.65647	2.33349	0.00035	0.00857439	yes
XLOC_010524	XLOC_010524	Ect3	3R:11994174-12005473	Wild Type	ZnF2 Mutant	OK	0.268983	8.99992	5.06433	3.7005	0.00035	0.00857439	yes
XLOC_009201	XLOC_009201	app	3L:12206237-12266841	Wild Type	ZnF2 Mutant	OK	27.3248	12.1436	-1.17001	-2.23472	0.0004	0.00956757	yes
XLOC_001029	XLOC_001029	CG31729	2L:13289996-13301668	Wild Type	ZnF2 Mutant	OK	71.8864	39.6498	-0.858404	-2.10312	0.0004	0.00956757	yes
XLOC_007254	XLOC_007254	foi	3L:8525243-8534503	Wild Type	ZnF2 Mutant	OK	27.7434	54.3778	0.970873	2.10374	0.0004	0.00956757	yes
XLOC_010739	XLOC_010739	CG42404	3R:15250093-15257765	Wild Type	ZnF2 Mutant	OK	1.53995	5.35857	1.79896	2.1423	0.0004	0.00956757	yes
XLOC_001953	XLOC_001953	sob	2L:3578012-3580769	Wild Type	ZnF2 Mutant	OK	2.60927	9.96281	1.9329	2.31606	0.0004	0.00956757	yes
XLOC_001028	XLOC_001028	Uvrag	2L:13286776-13289556	Wild Type	ZnF2 Mutant	OK	3.3277	13.0252	1.96871	2.40927	0.0004	0.00956757	yes
XLOC_010644	XLOC_010644	Act87E	3R:13425832-13428375	Wild Type	ZnF2 Mutant	OK	0.614108	10.6331	4.11392	2.73696	0.0004	0.00956757	yes
XLOC_005302	XLOC_005302	CG45085,CG8026	2R:9186669-9192096	Wild Type	ZnF2 Mutant	OK	13.841	3.77126	-1.87583	-2.24552	0.00045	0.0104118	yes
XLOC_007029	XLOC_007029	CG34266	3L:4629603-4687317	Wild Type	ZnF2 Mutant	OK	123.466	34.4511	-1.84149	-2.34263	0.00045	0.0104118	yes
XLOC_013493	XLOC_013493	E(spl)m4-BFM	3R:26023820-26024579	Wild Type	ZnF2 Mutant	OK	102.871	39.4121	-1.38412	-2.29826	0.00045	0.0104118	yes
XLOC_006769	XLOC_006769	Sac1	3L:1247816-1250451	Wild Type	ZnF2 Mutant	OK	50.5642	24.5767	-1.04083	-2.07247	0.00045	0.0104118	yes
XLOC_011906	XLOC_011906	CG1910	3R:31747642-31754705	Wild Type	ZnF2 Mutant	OK	61.0291	108.073	0.824444	2.02458	0.00045	0.0104118	yes
XLOC_005789	XLOC_005789	Khc-73	2R:15515777-15532259	Wild Type	ZnF2 Mutant	OK	19.4913	38.5382	0.983459	2.1692	0.00045	0.0104118	yes
XLOC_007633	XLOC_007633	Tgi	3L:13486796-13502492	Wild Type	ZnF2 Mutant	OK	9.07752	24.0586	1.40618	2.07416	0.00045	0.0104118	yes
XLOC_010227	XLOC_010227	lds	3R:7920430-7967408	Wild Type	ZnF2 Mutant	OK	5.68688	15.2582	1.42387	2.21502	0.00045	0.0104118	yes
XLOC_010877	XLOC_010877	GckIII	3R:17085512-17087988	Wild Type	ZnF2 Mutant	OK	9.86871	27.7565	1.49189	2.36782	0.00045	0.0104118	yes
XLOC_009081	XLOC_009081	klu	3L:10981170-11009188	Wild Type	ZnF2 Mutant	OK	0.28906	1.55538	2.42783	1.96552	0.00045	0.0104118	yes
XLOC_007874	XLOC_007874	CG7730	3L:17027514-17032608	Wild Type	ZnF2 Mutant	OK	21.4295	6.33836	-1.75741	-2.27165	0.0005	0.0112025	yes
XLOC_009498	XLOC_009498	Baldspot	3L:16648441-16661615	Wild Type	ZnF2 Mutant	OK	23.27	8.34496	-1.47949	-2.22899	0.0005	0.0112025	yes
XLOC_007361	XLOC_007361	Naa60	3L:9726894-9729650	Wild Type	ZnF2 Mutant	OK	56.9723	27.1379	-1.06995	-2.08649	0.0005	0.0112025	yes
XLOC_007765	XLOC_007765	Hip14	3L:15988235-15992464	Wild Type	ZnF2 Mutant	OK	48.3167	24.5476	-0.976939	-2.08693	0.0005	0.0112025	yes
XLOC_002856	XLOC_002856	twe	2L:16257687-16261877	Wild Type	ZnF2 Mutant	OK	187.793	99.6495	-0.914206	-2.08414	0.0005	0.0112025	yes
XLOC_006914	XLOC_006914	Hsp83	3L:3192968-3197631	Wild Type	ZnF2 Mutant	OK	103.343	177.284	0.778618	2.0101	0.0005	0.0112025	yes
XLOC_001069	XLOC_001069	Sos	2L:13813815-13819824	Wild Type	ZnF2 Mutant	OK	10.4273	22.7632	1.12634	2.15498	0.0005	0.0112025	yes
XLOC_013341	XLOC_013341	jar	3R:24252825-24271233	Wild Type	ZnF2 Mutant	OK	10.2522	24.2148	1.23995	2.17686	0.0005	0.0112025	yes
XLOC_008835	XLOC_008835	corn	3L:7134515-7157073	Wild Type	ZnF2 Mutant	OK	17.546	44.2907	1.33586	2.34706	0.0005	0.0112025	yes
XLOC_009033	XLOC_009033	Cdk8	3L:9837079-9838670	Wild Type	ZnF2 Mutant	OK	10.9761	28.2754	1.36518	2.00139	0.0005	0.0112025	yes
XLOC_011134	XLOC_011134	Calx	3R:20978182-21015613	Wild Type	ZnF2 Mutant	OK	0.486643	0.047295	-3.3631	-1.37774	0.00055	0.0119815	yes
XLOC_009349	XLOC_009349	gnu	3L:14802379-14803360	Wild Type	ZnF2 Mutant	OK	35.4437	9.90471	-1.83934	-2.16021	0.00055	0.0119815	yes
XLOC_005369	XLOC_005369	CG1371	2R:10069105-10075645	Wild Type	ZnF2 Mutant	OK	36.1605	18.2617	-0.985596	-2.04148	0.00055	0.0119815	yes
XLOC_012465	XLOC_012465	CG6791	3R:11585353-11590146	Wild Type	ZnF2 Mutant	OK	36.2066	18.7391	-0.950196	-1.99916	0.00055	0.0119815	yes
XLOC_011989	XLOC_011989	cno	3R:5172479-5217456	Wild Type	ZnF2 Mutant	OK	178.383	109.665	-0.701876	-2.04238	0.00055	0.0119815	yes
XLOC_005172	XLOC_005172	CG45093	2R:7737018-7782637	Wild Type	ZnF2 Mutant	OK	213.929	133.789	-0.677172	-2.00426	0.00055	0.0119815	yes
XLOC_000129	XLOC_000129	cpb	2L:1704901-1706962	Wild Type	ZnF2 Mutant	OK	41.0877	79.2941	0.948507	1.94052	0.00055	0.0119815	yes
XLOC_008544	XLOC_008544	CG32486	3L:3055907-3070839	Wild Type	ZnF2 Mutant	OK	16.6397	37.4325	1.16966	2.10659	0.00055	0.0119815	yes
XLOC_011797	XLOC_011797	Tace	3R:30000529-30003678	Wild Type	ZnF2 Mutant	OK	5.24186	15.7327	1.58562	2.16075	0.00055	0.0119815	yes
XLOC_003676	XLOC_003676	magu	2R:10052540-10066514	Wild Type	ZnF2 Mutant	OK	22.6501	5.84239	-1.95488	-2.43834	0.0006	0.0127952	yes
XLOC_009560	XLOC_009560	CG43085	3L:17645485-17646737	Wild Type	ZnF2 Mutant	OK	63.6582	23.4531	-1.44057	-2.23448	0.0006	0.0127952	yes
XLOC_002460	XLOC_002460	nmd	2L:10302172-10303947	Wild Type	ZnF2 Mutant	OK	142.138	73.7027	-0.947503	-2.0557	0.0006	0.0127952	yes
XLOC_009328	XLOC_009328	stwl	3L:14402929-14409939	Wild Type	ZnF2 Mutant	OK	74.5577	41.9016	-0.831351	-2.00163	0.0006	0.0127952	yes
XLOC_011634	XLOC_011634	Hmu	3R:27288768-27292209	Wild Type	ZnF2 Mutant	OK	114.741	65.4151	-0.810683	-1.95254	0.0006	0.0127952	yes
XLOC_007005	XLOC_007005	Claspin	3L:4313482-4318608	Wild Type	ZnF2 Mutant	OK	5.31123	12.4116	1.22457	2.07017	0.0006	0.0127952	yes
XLOC_006496	XLOC_006496	CG34371	2R:23163011-23203973	Wild Type	ZnF2 Mutant	OK	0.394663	2.76021	2.80609	2.4762	0.0006	0.0127952	yes
XLOC_001558	XLOC_001558	Tsp39D	2L:21344606-21358271	Wild Type	ZnF2 Mutant	OK	15.4503	5.08266	-1.60398	-2.20701	0.00065	0.0136558	yes
XLOC_010325	XLOC_010325	CG8420	3R:9246648-9251431	Wild Type	ZnF2 Mutant	OK	38.3244	17.3292	-1.14506	-1.97964	0.00065	0.0136558	yes
XLOC_004131	XLOC_004131	CG8405	2R:16047647-16060835	Wild Type	ZnF2 Mutant	OK	61.451	33.0863	-0.893204	-1.9776	0.00065	0.0136558	yes
XLOC_003179	XLOC_003179	Dap160	2L:21134438-21142347	Wild Type	ZnF2 Mutant	OK	11.2876	24.7254	1.13125	2.04185	0.00065	0.0136558	yes
XLOC_013335	XLOC_013335	jnj	3R:24189049-24193423	Wild Type	ZnF2 Mutant	OK	2.83748	7.74627	1.44889	1.9343	0.00065	0.0136558	yes
XLOC_005591	XLOC_005591	CG17574	2R:12849357-12869783	Wild Type	ZnF2 Mutant	OK	63.0625	21.9411	-1.52315	-2.29947	0.0007	0.014449	yes
XLOC_003002	XLOC_003002	Jwa	2L:18704569-18705703	Wild Type	ZnF2 Mutant	OK	28.616	11.4197	-1.32529	-1.87097	0.0007	0.014449	yes
XLOC_012373	XLOC_012373	tws	3R:10126128-10139772	Wild Type	ZnF2 Mutant	OK	40.7371	17.3871	-1.22833	-2.16659	0.0007	0.014449	yes
XLOC_000225	XLOC_000225	lilli	2L:2885928-2954406	Wild Type	ZnF2 Mutant	OK	27.7057	13.4427	-1.04336	-2.06331	0.0007	0.014449	yes
XLOC_007065	XLOC_007065	bc10	3L:5565230-5566765	Wild Type	ZnF2 Mutant	OK	96.3553	46.8251	-1.04108	-2.07586	0.0007	0.014449	yes
XLOC_006959	XLOC_006959	enc	3L:3818678-3842326	Wild Type	ZnF2 Mutant	OK	20.6888	10.656	-0.957187	-2.01425	0.0007	0.014449	yes
XLOC_008979	XLOC_008979	Argk	3L:9048780-9066027	Wild Type	ZnF2 Mutant	OK	15.3491	5.46115	-1.49088	-1.98222	0.00075	0.0150852	yes
XLOC_008193	XLOC_008193	Atox1	3L:21640994-21642599	Wild Type	ZnF2 Mutant	OK	88.0147	41.9762	-1.06817	-1.91212	0.00075	0.0150852	yes
XLOC_007373	XLOC_007373	CalpB	3L:9888761-9894743	Wild Type	ZnF2 Mutant	OK	47.4682	24.5282	-0.952521	-1.98702	0.00075	0.0150852	yes
XLOC_007695	XLOC_007695	mnd	3L:14985099-14991667	Wild Type	ZnF2 Mutant	OK	93.7127	51.2901	-0.869564	-1.94119	0.00075	0.0150852	yes
XLOC_004333	XLOC_004333	grh	2R:17800684-17842820	Wild Type	ZnF2 Mutant	OK	19.2015	40.2461	1.06763	2.08346	0.00075	0.0150852	yes
XLOC_009314	XLOC_009314	blue	3L:14043693-14049892	Wild Type	ZnF2 Mutant	OK	3.76876	9.6178	1.35162	2.1121	0.00075	0.0150852	yes
XLOC_004480	XLOC_004480	CG7744	2R:19452503-19455527	Wild Type	ZnF2 Mutant	OK	5.12774	13.9436	1.44321	2.01925	0.00075	0.0150852	yes
XLOC_012572	XLOC_012572	CG7381	3R:12967774-12977471	Wild Type	ZnF2 Mutant	OK	4.34704	12.9705	1.57713	2.20014	0.00075	0.0150852	yes
XLOC_001971	XLOC_001971	cutlet	2L:3707229-3711748	Wild Type	ZnF2 Mutant	OK	0.49189	2.67896	2.44527	1.99476	0.00075	0.0150852	yes
XLOC_003285	XLOC_003285	Cht3	2L:22999573-23025915	Wild Type	ZnF2 Mutant	OK	3.85438	1.32201	-1.54377	-2.09145	0.0008	0.0157333	yes
XLOC_010688	XLOC_010688	CG12207	3R:14289070-14302276	Wild Type	ZnF2 Mutant	OK	28.1349	10.0052	-1.49161	-2.15017	0.0008	0.0157333	yes
XLOC_010438	XLOC_010438	CG4089	3R:10815287-10817490	Wild Type	ZnF2 Mutant	OK	26.6915	11.5844	-1.20419	-1.93061	0.0008	0.0157333	yes
XLOC_009656	XLOC_009656	CG3797	3L:19059399-19062816	Wild Type	ZnF2 Mutant	OK	42.3603	21.6755	-0.966647	-1.93443	0.0008	0.0157333	yes
XLOC_011434	XLOC_011434	Mink,Trf4-2	3R:24922472-24927085	Wild Type	ZnF2 Mutant	OK	113.821	61.6446	-0.884721	-1.97273	0.0008	0.0157333	yes
XLOC_012005	XLOC_012005	hd	3R:5372591-5374634	Wild Type	ZnF2 Mutant	OK	7.92155	19.826	1.32354	1.90873	0.0008	0.0157333	yes
XLOC_001538	XLOC_001538	Nhe2	2L:21104567-21134255	Wild Type	ZnF2 Mutant	OK	5.98116	15.9699	1.41685	2.24917	0.0008	0.0157333	yes
XLOC_011774	XLOC_011774	yata	3R:29749218-29754528	Wild Type	ZnF2 Mutant	OK	3.79915	10.9876	1.53213	2.16855	0.0008	0.0157333	yes
XLOC_010293	XLOC_010293	CG8145	3R:8723173-8725357	Wild Type	ZnF2 Mutant	OK	20.9788	6.28598	-1.73872	-2.26589	0.00085	0.016533	yes
XLOC_010502	XLOC_010502	CG14715	3R:11674220-11678116	Wild Type	ZnF2 Mutant	OK	346.57	189.868	-0.868148	-1.91536	0.00085	0.016533	yes
XLOC_007336	XLOC_007336	Jarid2	3L:9477037-9487790	Wild Type	ZnF2 Mutant	OK	70.785	42.333	-0.74166	-1.95019	0.00085	0.016533	yes
XLOC_006839	XLOC_006839	Cnb	3L:1947564-1950262	Wild Type	ZnF2 Mutant	OK	2.84631	10.6535	1.90416	2.24008	0.00085	0.016533	yes
XLOC_006237	XLOC_006237	CG10444	2R:20271652-20274499	Wild Type	ZnF2 Mutant	OK	22.575	9.9174	-1.18669	-1.94803	0.0009	0.016992	yes
XLOC_010444	XLOC_010444	Tsp86D	3R:10868707-10870555	Wild Type	ZnF2 Mutant	OK	46.8736	20.7747	-1.17395	-1.9618	0.0009	0.016992	yes
XLOC_011237	XLOC_011237	mats	3R:22421160-22423302	Wild Type	ZnF2 Mutant	OK	74.5598	34.5838	-1.1083	-1.97792	0.0009	0.016992	yes
XLOC_010748	XLOC_010748	ear	3R:15320755-15325279	Wild Type	ZnF2 Mutant	OK	62.7974	34.8349	-0.850171	-1.90817	0.0009	0.016992	yes
XLOC_000815	XLOC_000815	da	2L:10388104-10393434	Wild Type	ZnF2 Mutant	OK	29.7625	56.317	0.920077	1.92643	0.0009	0.016992	yes
XLOC_000230	XLOC_000230	CG3558	2L:2992869-2998726	Wild Type	ZnF2 Mutant	OK	12.9389	25.8409	0.997945	1.95991	0.0009	0.016992	yes
XLOC_000593	XLOC_000593	LanB1	2L:7811437-7820771	Wild Type	ZnF2 Mutant	OK	3.82227	9.24273	1.27389	2.04738	0.0009	0.016992	yes
XLOC_011065	XLOC_011065	Pk92B	3R:19879718-19886030	Wild Type	ZnF2 Mutant	OK	3.6535	8.96254	1.29463	1.98332	0.0009	0.016992	yes
XLOC_012481	XLOC_012481	Sbf	3R:11787175-11796948	Wild Type	ZnF2 Mutant	OK	2.51853	6.76209	1.42489	2.11577	0.0009	0.016992	yes
XLOC_003452	XLOC_003452	Vps13	2R:7566808-7587079	Wild Type	ZnF2 Mutant	OK	0.895318	2.53189	1.49974	1.88815	0.0009	0.016992	yes
XLOC_011163	XLOC_011163	tin	3R:21378976-21381970	Wild Type	ZnF2 Mutant	OK	0.93157	5.24069	2.49202	1.86894	0.0009	0.016992	yes
XLOC_007999	XLOC_007999	fal	3L:19294563-19337609	Wild Type	ZnF2 Mutant	OK	33.6178	12.8656	-1.38571	-2.09398	0.00095	0.0176535	yes
XLOC_013679	XLOC_013679	stg	3R:29251825-29255800	Wild Type	ZnF2 Mutant	OK	24.7214	10.6128	-1.21995	-2.01906	0.00095	0.0176535	yes
XLOC_003812	XLOC_003812	Drep-1	2R:12044611-12050172	Wild Type	ZnF2 Mutant	OK	194.511	112.277	-0.79279	-2.02065	0.00095	0.0176535	yes
XLOC_011346	XLOC_011346	SMC1	3R:24058286-24062815	Wild Type	ZnF2 Mutant	OK	7.89051	16.7698	1.08767	1.84966	0.00095	0.0176535	yes
XLOC_003785	XLOC_003785	pyr	2R:11712262-11726345	Wild Type	ZnF2 Mutant	OK	3.56609	11.5564	1.69627	2.18944	0.00095	0.0176535	yes
XLOC_005967	XLOC_005967	P32	2R:17671308-17672640	Wild Type	ZnF2 Mutant	OK	5.93472	21.7017	1.87056	2.16801	0.00095	0.0176535	yes
XLOC_009745	XLOC_009745	CG7298	3L:20202069-20203687	Wild Type	ZnF2 Mutant	OK	4.09458	0.227096	-4.17234	-2.3811	0.001	0.0181538	yes
XLOC_002875	XLOC_002875	CG5953,mir-4943	2L:16508077-16532877	Wild Type	ZnF2 Mutant	OK	16.1186	5.59349	-1.5269	-2.10216	0.001	0.0181538	yes
XLOC_006047	XLOC_006047	l(2)08717	2R:18796974-18803727	Wild Type	ZnF2 Mutant	OK	20.8756	7.83156	-1.41445	-2.04498	0.001	0.0181538	yes
XLOC_008170	XLOC_008170	Syx7	3L:21445833-21448128	Wild Type	ZnF2 Mutant	OK	87.3535	44.3945	-0.976484	-1.94018	0.001	0.0181538	yes
XLOC_009226	XLOC_009226	nst	3L:12527214-12530171	Wild Type	ZnF2 Mutant	OK	131.171	74.9404	-0.807629	-1.97886	0.001	0.0181538	yes
XLOC_010333	XLOC_010333	CG43675,CG45050	3R:9340215-9362994	Wild Type	ZnF2 Mutant	OK	276.443	164.995	-0.744559	-1.90997	0.001	0.0181538	yes
XLOC_013056	XLOC_013056	Stat92E	3R:20535322-20552311	Wild Type	ZnF2 Mutant	OK	201.216	125.851	-0.677036	-1.91879	0.001	0.0181538	yes
XLOC_003933	XLOC_003933	GstE14	2R:13239728-13241013	Wild Type	ZnF2 Mutant	OK	8.87343	28.3704	1.67682	2.12788	0.001	0.0181538	yes
XLOC_011600	XLOC_011600	sda	3R:26915760-26945309	Wild Type	ZnF2 Mutant	OK	0.360233	1.98344	2.46101	2.2064	0.001	0.0181538	yes
XLOC_004370	XLOC_004370	fj	2R:18232760-18236311	Wild Type	ZnF2 Mutant	OK	11.9335	4.66775	-1.35421	-1.98819	0.00105	0.0188203	yes
XLOC_011103	XLOC_011103	H	3R:20621937-20628915	Wild Type	ZnF2 Mutant	OK	92.0918	52.8675	-0.800691	-1.93646	0.00105	0.0188203	yes
XLOC_008622	XLOC_008622	ens	3L:4122906-4134550	Wild Type	ZnF2 Mutant	OK	170.258	102.766	-0.728355	-1.99188	0.00105	0.0188203	yes
XLOC_010876	XLOC_010876	kuk	3R:17080243-17084781	Wild Type	ZnF2 Mutant	OK	2183.24	3097.59	0.504678	1.88656	0.00105	0.0188203	yes
XLOC_003786	XLOC_003786	ths	2R:11756816-11814424	Wild Type	ZnF2 Mutant	OK	2.44811	10.4813	2.09807	2.34509	0.00105	0.0188203	yes
XLOC_004061	XLOC_004061	Cyp6a20	2R:14882117-14884046	Wild Type	ZnF2 Mutant	OK	2.19887	0.203822	-3.43138	-2.09114	0.0011	0.0192772	yes
XLOC_005170	XLOC_005170	tor	2R:7705182-7709184	Wild Type	ZnF2 Mutant	OK	42.5014	21.6783	-0.97126	-1.92704	0.0011	0.0192772	yes
XLOC_007377	XLOC_007377	vnc	3L:9972311-9974023	Wild Type	ZnF2 Mutant	OK	156.023	84.1149	-0.891328	-1.89381	0.0011	0.0192772	yes
XLOC_011372	XLOC_011372	crb	3R:24295077-24314541	Wild Type	ZnF2 Mutant	OK	44.7674	74.2504	0.729951	1.92361	0.0011	0.0192772	yes
XLOC_011445	XLOC_011445	CG11791	3R:25049615-25053074	Wild Type	ZnF2 Mutant	OK	43.1638	84.8914	0.975796	1.97608	0.0011	0.0192772	yes
XLOC_013567	XLOC_013567	CG18766	3R:27242334-27245249	Wild Type	ZnF2 Mutant	OK	10.0687	27.5845	1.45398	2.09339	0.0011	0.0192772	yes
XLOC_004671	XLOC_004671	NC2alpha	2R:21670151-21671593	Wild Type	ZnF2 Mutant	OK	7.29761	22.0749	1.59691	2.03325	0.0011	0.0192772	yes
XLOC_003984	XLOC_003984	Aats-phe	2R:13968307-13969902	Wild Type	ZnF2 Mutant	OK	3.56775	12.1518	1.76809	1.99103	0.0011	0.0192772	yes
XLOC_011316	XLOC_011316	CG31414	3R:23704803-23708512	Wild Type	ZnF2 Mutant	OK	0.244556	2.67705	3.45241	1.98221	0.0011	0.0192772	yes
XLOC_013754	XLOC_013754	Mlc2	3R:30171437-30174551	Wild Type	ZnF2 Mutant	OK	4.03728	0.313385	-3.68738	-2.50279	0.00115	0.0194785	yes
XLOC_002550	XLOC_002550	CG6287	2L:11151505-11155721	Wild Type	ZnF2 Mutant	OK	14.8928	4.21752	-1.82015	-2.10372	0.00115	0.0194785	yes
XLOC_013420	XLOC_013420	bam	3R:25242019-25245057	Wild Type	ZnF2 Mutant	OK	25.1981	10.3456	-1.28429	-1.99244	0.00115	0.0194785	yes
XLOC_009667	XLOC_009667	nes	3L:19257281-19260895	Wild Type	ZnF2 Mutant	OK	35.1652	14.9488	-1.23412	-1.98649	0.00115	0.0194785	yes
XLOC_002532	XLOC_002532	piwi	2L:10976771-10987420	Wild Type	ZnF2 Mutant	OK	20.0612	8.77547	-1.19286	-1.85526	0.00115	0.0194785	yes
XLOC_011040	XLOC_011040	Dys,snoRNA:Me18S-A1374	3R:19461084-19597288	Wild Type	ZnF2 Mutant	OK	16.6587	7.69405	-1.11446	-1.8236	0.00115	0.0194785	yes
XLOC_004607	XLOC_004607	CG10543	2R:20996219-21007740	Wild Type	ZnF2 Mutant	OK	15.9503	7.69795	-1.05104	-1.9372	0.00115	0.0194785	yes
XLOC_010262	XLOC_010262	mRpL1	3R:8301439-8304023	Wild Type	ZnF2 Mutant	OK	103.057	52.6323	-0.969419	-1.87879	0.00115	0.0194785	yes
XLOC_001957	XLOC_001957	for	2L:3622073-3656953	Wild Type	ZnF2 Mutant	OK	336.286	218.455	-0.62235	-1.8921	0.00115	0.0194785	yes
XLOC_002826	XLOC_002826	Gli	2L:15756001-15762758	Wild Type	ZnF2 Mutant	OK	10.354	21.212	1.0347	1.92687	0.00115	0.0194785	yes
XLOC_002922	XLOC_002922	Lrch	2L:17367510-17384115	Wild Type	ZnF2 Mutant	OK	11.8723	25.7988	1.11971	1.99022	0.00115	0.0194785	yes
XLOC_012051	XLOC_012051	Sym	3R:5738177-5742476	Wild Type	ZnF2 Mutant	OK	7.00995	16.6173	1.24521	2.08665	0.00115	0.0194785	yes
XLOC_000281	XLOC_000281	drm	2L:3539246-3548423	Wild Type	ZnF2 Mutant	OK	2.2809	8.32213	1.86735	2.14177	0.00115	0.0194785	yes
XLOC_012021	XLOC_012021	mia	3R:5548114-5551168	Wild Type	ZnF2 Mutant	OK	2.28134	9.63618	2.07858	2.21337	0.00115	0.0194785	yes
XLOC_003043	XLOC_003043	l(2)37Cc	2L:19121344-19123869	Wild Type	ZnF2 Mutant	OK	97.0846	50.5792	-0.940698	-1.86202	0.0012	0.0200851	yes
XLOC_008344	XLOC_008344	rno	3L:187206-199762	Wild Type	ZnF2 Mutant	OK	5.56526	10.9851	0.981026	1.94662	0.0012	0.0200851	yes
XLOC_004024	XLOC_004024	Asx	2R:14503957-14512493	Wild Type	ZnF2 Mutant	OK	6.81659	15.0742	1.14496	2.04334	0.0012	0.0200851	yes
XLOC_011474	XLOC_011474	RIOK2	3R:25265843-25270007	Wild Type	ZnF2 Mutant	OK	6.41183	17.3586	1.43684	1.931	0.0012	0.0200851	yes
XLOC_002209	XLOC_002209	CG18304	2L:6932120-6942814	Wild Type	ZnF2 Mutant	OK	0.0875233	0.889327	3.34498	2.20185	0.0012	0.0200851	yes
XLOC_009752	XLOC_009752	gogo	3L:20268858-20295133	Wild Type	ZnF2 Mutant	OK	5.87147	1.83986	-1.67413	-2.11641	0.00125	0.0206294	yes
XLOC_005301	XLOC_005301	ltd	2R:9177863-9186342	Wild Type	ZnF2 Mutant	OK	77.513	34.7278	-1.15835	-1.97298	0.00125	0.0206294	yes
XLOC_001909	XLOC_001909	Chd1	2L:2979561-2987723	Wild Type	ZnF2 Mutant	OK	23.3006	40.4246	0.794868	1.87998	0.00125	0.0206294	yes
XLOC_000080	XLOC_000080	PNUTS	2L:870464-877038	Wild Type	ZnF2 Mutant	OK	30.4459	57.5904	0.919579	1.95976	0.00125	0.0206294	yes
XLOC_008042	XLOC_008042	Rpn1	3L:19915050-19918160	Wild Type	ZnF2 Mutant	OK	18.5922	36.6398	0.978718	1.91251	0.00125	0.0206294	yes
XLOC_001348	XLOC_001348	CG10176	2L:18485416-18503978	Wild Type	ZnF2 Mutant	OK	9.47761	24.9179	1.39459	2.02259	0.00125	0.0206294	yes
XLOC_008033	XLOC_008033	Kap-alpha1	3L:19807231-19810398	Wild Type	ZnF2 Mutant	OK	70.4031	36.0666	-0.964974	-1.9922	0.0013	0.0209658	yes
XLOC_000206	XLOC_000206	Hrs	2L:2739985-2744934	Wild Type	ZnF2 Mutant	OK	69.2895	38.1133	-0.862341	-1.87676	0.0013	0.0209658	yes
XLOC_000369	XLOC_000369	CG3008	2L:4883297-4885669	Wild Type	ZnF2 Mutant	OK	84.2351	46.5757	-0.854843	-1.90719	0.0013	0.0209658	yes
XLOC_007001	XLOC_007001	CG1316	3L:4283850-4286865	Wild Type	ZnF2 Mutant	OK	53.0337	95.9275	0.855035	1.91421	0.0013	0.0209658	yes
XLOC_003698	XLOC_003698	Prx2540-2	2R:10418717-10419761	Wild Type	ZnF2 Mutant	OK	26.8922	64.4855	1.26179	1.93798	0.0013	0.0209658	yes
XLOC_003662	XLOC_003662	CG30007	2R:9891954-9898513	Wild Type	ZnF2 Mutant	OK	4.10694	10.0552	1.29181	2.07112	0.0013	0.0209658	yes
XLOC_000820	XLOC_000820	RfC3	2L:10419189-10420612	Wild Type	ZnF2 Mutant	OK	11.8424	30.3945	1.35985	1.85421	0.0013	0.0209658	yes
XLOC_006731	XLOC_006731	Rev1	3L:654362-657971	Wild Type	ZnF2 Mutant	OK	1.95786	6.48497	1.72782	2.03081	0.0013	0.0209658	yes
XLOC_001989	XLOC_001989	ft	2L:4198403-4221796	Wild Type	ZnF2 Mutant	OK	0.41657	1.40708	1.75607	2.03448	0.0013	0.0209658	yes
XLOC_000676	XLOC_000676	Trs23	2L:8686230-8687052	Wild Type	ZnF2 Mutant	OK	13.0883	47.0538	1.84603	2.20585	0.0013	0.0209658	yes
XLOC_008576	XLOC_008576	CG14969	3L:3330062-3334978	Wild Type	ZnF2 Mutant	OK	21.0658	8.7462	-1.26818	-1.7977	0.00135	0.0213348	yes
XLOC_008953	XLOC_008953	SrpRbeta	3L:8718948-8720225	Wild Type	ZnF2 Mutant	OK	57.7264	25.1344	-1.19957	-1.96811	0.00135	0.0213348	yes
XLOC_005702	XLOC_005702	Arc1	2R:14357926-14360297	Wild Type	ZnF2 Mutant	OK	64.0947	35.0455	-0.870977	-1.83854	0.00135	0.0213348	yes
XLOC_013880	XLOC_013880	Map205	3R:32055278-32068441	Wild Type	ZnF2 Mutant	OK	85.8623	50.2638	-0.772506	-1.95278	0.00135	0.0213348	yes
XLOC_000029	XLOC_000029	Hop	2L:295121-297449	Wild Type	ZnF2 Mutant	OK	17.3764	36.3285	1.06397	1.8903	0.00135	0.0213348	yes
XLOC_009691	XLOC_009691	l(3)76BDr	3L:19544344-19552290	Wild Type	ZnF2 Mutant	OK	5.88826	12.6472	1.1029	1.91371	0.00135	0.0213348	yes
XLOC_005824	XLOC_005824	casp	2R:16024627-16028161	Wild Type	ZnF2 Mutant	OK	6.71398	15.9726	1.25036	1.87958	0.00135	0.0213348	yes
XLOC_009374	XLOC_009374	CG12316	3L:15131507-15136934	Wild Type	ZnF2 Mutant	OK	4.84201	11.9044	1.29782	1.97063	0.00135	0.0213348	yes
XLOC_004727	XLOC_004727	rad50	2R:22421012-22425482	Wild Type	ZnF2 Mutant	OK	1.95622	5.92667	1.59915	2.00622	0.00135	0.0213348	yes
XLOC_006091	XLOC_006091	sm	2R:19517863-19631508	Wild Type	ZnF2 Mutant	OK	6.88396	1.57021	-2.13228	-1.97386	0.0014	0.0216893	yes
XLOC_005088	XLOC_005088	CG9436	2R:6757600-6758903	Wild Type	ZnF2 Mutant	OK	45.815	19.711	-1.21682	-1.97664	0.0014	0.0216893	yes
XLOC_005344	XLOC_005344	Vamp7	2R:9839775-9842502	Wild Type	ZnF2 Mutant	OK	121.572	61.7176	-0.978052	-1.92	0.0014	0.0216893	yes
XLOC_000145	XLOC_000145	Npc2a	2L:1988289-1988940	Wild Type	ZnF2 Mutant	OK	357.95	201.685	-0.827652	-1.88734	0.0014	0.0216893	yes
XLOC_007293	XLOC_007293	CG5026	3L:8968527-8971752	Wild Type	ZnF2 Mutant	OK	130.992	77.9749	-0.748398	-1.8406	0.0014	0.0216893	yes
XLOC_005810	XLOC_005810	sli	2R:15869494-15922118	Wild Type	ZnF2 Mutant	OK	45.6287	75.2315	0.721393	1.90423	0.0014	0.0216893	yes
XLOC_005483	XLOC_005483	tou	2R:11577484-11616045	Wild Type	ZnF2 Mutant	OK	47.0864	92.0278	0.966758	1.81731	0.0014	0.0216893	yes
XLOC_010566	XLOC_010566	CG5167	3R:12406531-12408107	Wild Type	ZnF2 Mutant	OK	10.8576	25.4153	1.22699	1.8459	0.0014	0.0216893	yes
XLOC_006716	XLOC_006716	CG1233	3L:361471-366437	Wild Type	ZnF2 Mutant	OK	4.20135	10.8879	1.3738	1.94029	0.0014	0.0216893	yes
XLOC_002372	XLOC_002372	rost	2L:8985935-8989539	Wild Type	ZnF2 Mutant	OK	20.8602	3.28886	-2.66509	-2.37742	0.00145	0.0220774	yes
XLOC_012983	XLOC_012983	cdi	3R:19044881-19094270	Wild Type	ZnF2 Mutant	OK	6.74511	2.68286	-1.33007	-1.95752	0.00145	0.0220774	yes
XLOC_006813	XLOC_006813	Bro	3L:1647868-1648612	Wild Type	ZnF2 Mutant	OK	499.268	298.052	-0.744249	-1.8605	0.00145	0.0220774	yes
XLOC_003376	XLOC_003376	Adf1	2R:6662264-6668085	Wild Type	ZnF2 Mutant	OK	47.0483	87.8985	0.901695	1.83926	0.00145	0.0220774	yes
XLOC_004626	XLOC_004626	Xpd	2R:21171000-21174504	Wild Type	ZnF2 Mutant	OK	13.5006	27.9187	1.0482	1.89069	0.00145	0.0220774	yes
XLOC_012384	XLOC_012384	Bruce	3R:10312038-10331353	Wild Type	ZnF2 Mutant	OK	3.54857	7.64778	1.1078	1.93893	0.00145	0.0220774	yes
XLOC_009761	XLOC_009761	DNApol-alpha60	3L:20359832-20361585	Wild Type	ZnF2 Mutant	OK	5.1009	15.1664	1.57205	1.9856	0.00145	0.0220774	yes
XLOC_013638	XLOC_013638	CG10011	3R:28606078-28635099	Wild Type	ZnF2 Mutant	OK	2.3809	9.41255	1.98308	2.61223	0.00145	0.0220774	yes
XLOC_009115	XLOC_009115	CG6175	3L:11287935-11295919	Wild Type	ZnF2 Mutant	OK	17.1823	7.50954	-1.19413	-1.89819	0.0015	0.0225478	yes
XLOC_012927	XLOC_012927	CG7156	3R:18236191-18242159	Wild Type	ZnF2 Mutant	OK	32.1936	15.3996	-1.06388	-1.82303	0.0015	0.0225478	yes
XLOC_005874	XLOC_005874	CG8311	2R:16587044-16589184	Wild Type	ZnF2 Mutant	OK	44.1164	22.4787	-0.972757	-1.8062	0.0015	0.0225478	yes
XLOC_000789	XLOC_000789	me31B	2L:10239340-10242172	Wild Type	ZnF2 Mutant	OK	1471.59	1012.19	-0.539898	-1.80909	0.0015	0.0225478	yes
XLOC_007684	XLOC_007684	Tdrd3	3L:14786790-14789665	Wild Type	ZnF2 Mutant	OK	27.4448	52.4225	0.933653	1.89198	0.0015	0.0225478	yes
XLOC_005277	XLOC_005277	CG8230	2R:8944297-8947344	Wild Type	ZnF2 Mutant	OK	3.00844	8.54412	1.50592	1.89632	0.0015	0.0225478	yes
XLOC_004500	XLOC_004500	isopeptidase-T-3	2R:19670617-19673477	Wild Type	ZnF2 Mutant	OK	55.3274	29.2225	-0.920915	-1.82051	0.00155	0.0231032	yes
XLOC_012523	XLOC_012523	MBD-R2	3R:12352142-12356265	Wild Type	ZnF2 Mutant	OK	11.2686	22.9606	1.02686	1.86472	0.00155	0.0231032	yes
XLOC_004023	XLOC_004023	L	2R:14481186-14497312	Wild Type	ZnF2 Mutant	OK	10.4885	23.4322	1.15968	1.91379	0.00155	0.0231032	yes
XLOC_003125	XLOC_003125	La	2L:20348392-20350012	Wild Type	ZnF2 Mutant	OK	6.61512	19.6656	1.57183	2.03426	0.00155	0.0231032	yes
XLOC_004064	XLOC_004064	Lap1	2R:14935659-14940722	Wild Type	ZnF2 Mutant	OK	28.1996	14.5046	-0.959164	-1.84388	0.0016	0.0237484	yes
XLOC_005151	XLOC_005151	Drat	2R:7526117-7532981	Wild Type	ZnF2 Mutant	OK	1.9855	7.97271	2.00557	2.05679	0.0016	0.0237484	yes
XLOC_010713	XLOC_010713	BigH1	3R:14663449-14664822	Wild Type	ZnF2 Mutant	OK	83.5331	40.3166	-1.05098	-1.90626	0.00165	0.0242869	yes
XLOC_005188	XLOC_005188	CG14764	2R:7942042-7955882	Wild Type	ZnF2 Mutant	OK	141.669	86.3016	-0.715059	-1.77132	0.00165	0.0242869	yes
XLOC_011351	XLOC_011351	Tsc1	3R:24130306-24134654	Wild Type	ZnF2 Mutant	OK	90.7995	55.7251	-0.704358	-1.79839	0.00165	0.0242869	yes
XLOC_002649	XLOC_002649	Vha68-1	2L:13000769-13004107	Wild Type	ZnF2 Mutant	OK	4.20061	11.9224	1.50501	1.99194	0.00165	0.0242869	yes
XLOC_000152	XLOC_000152	CG4238	2L:2009858-2030788	Wild Type	ZnF2 Mutant	OK	3.66183	0.884417	-2.04977	-1.96919	0.0017	0.0246639	yes
XLOC_006482	XLOC_006482	CG43659	2R:23079379-23079715	Wild Type	ZnF2 Mutant	OK	128.176	41.3589	-1.63186	-2.08507	0.0017	0.0246639	yes
XLOC_009989	XLOC_009989	CG11739	3R:4378599-4381210	Wild Type	ZnF2 Mutant	OK	18.619	6.18595	-1.58971	-1.99053	0.0017	0.0246639	yes
XLOC_006810	XLOC_006810	ABCB7,CG33230	3L:1618413-1629301	Wild Type	ZnF2 Mutant	OK	37.381	17.2364	-1.11685	-1.87573	0.0017	0.0246639	yes
XLOC_007556	XLOC_007556	vih	3L:12504291-12507840	Wild Type	ZnF2 Mutant	OK	39.8441	77.7172	0.963866	1.83172	0.0017	0.0246639	yes
XLOC_002651	XLOC_002651	A16	2L:13019574-13021312	Wild Type	ZnF2 Mutant	OK	15.0098	33.9901	1.17921	1.81053	0.0017	0.0246639	yes
XLOC_012224	XLOC_012224	CG9630	3R:8267942-8269896	Wild Type	ZnF2 Mutant	OK	2.93772	9.3724	1.67372	1.92482	0.0017	0.0246639	yes
XLOC_009939	XLOC_009939	CG32350	3L:23147655-23150668	Wild Type	ZnF2 Mutant	OK	29.3188	13.8983	-1.07692	-1.90111	0.00175	0.0250303	yes
XLOC_007755	XLOC_007755	dbo	3L:15826887-15832004	Wild Type	ZnF2 Mutant	OK	59.9708	34.7247	-0.788299	-1.82212	0.00175	0.0250303	yes
XLOC_012342	XLOC_012342	Snap24	3R:9761304-9763150	Wild Type	ZnF2 Mutant	OK	133.203	77.3657	-0.783862	-1.81914	0.00175	0.0250303	yes
XLOC_003880	XLOC_003880	CG30056,fra	2R:12529052-12564184	Wild Type	ZnF2 Mutant	OK	18.9642	34.8528	0.877994	1.53409	0.00175	0.0250303	yes
XLOC_012913	XLOC_012913	CG18012	3R:17809400-17811126	Wild Type	ZnF2 Mutant	OK	22.5975	45.9002	1.02234	1.79414	0.00175	0.0250303	yes
XLOC_008380	XLOC_008380	MED30	3L:652986-654089	Wild Type	ZnF2 Mutant	OK	14.6628	34.5591	1.23691	1.76374	0.00175	0.0250303	yes
XLOC_011341	XLOC_011341	Ime4	3R:24032156-24034257	Wild Type	ZnF2 Mutant	OK	11.14	26.392	1.24435	1.93891	0.00175	0.0250303	yes
XLOC_003287	XLOC_003287	CG12567	2L:23161121-23174484	Wild Type	ZnF2 Mutant	OK	143.071	76.4955	-0.903281	-1.93788	0.0018	0.0254371	yes
XLOC_002990	XLOC_002990	CG10413	2L:18599754-18605249	Wild Type	ZnF2 Mutant	OK	72.5997	43.1274	-0.751359	-1.82687	0.0018	0.0254371	yes
XLOC_002714	XLOC_002714	Smg5	2L:13898827-13904661	Wild Type	ZnF2 Mutant	OK	103.26	160.702	0.638107	1.81788	0.0018	0.0254371	yes
XLOC_010418	XLOC_010418	jumu	3R:10350181-10361612	Wild Type	ZnF2 Mutant	OK	51.1028	87.4648	0.7753	1.8819	0.0018	0.0254371	yes
XLOC_009437	XLOC_009437	Zn72D	3L:16106593-16112626	Wild Type	ZnF2 Mutant	OK	15.1597	30.0136	0.985376	1.89572	0.0018	0.0254371	yes
XLOC_010401	XLOC_010401	CG3940	3R:10112236-10120081	Wild Type	ZnF2 Mutant	OK	6.12234	18.6103	1.60395	2.03741	0.0018	0.0254371	yes
XLOC_009743	XLOC_009743	CG42674	3L:20149613-20198317	Wild Type	ZnF2 Mutant	OK	5.38868	1.83749	-1.5522	-2.00182	0.00185	0.0258343	yes
XLOC_006603	XLOC_006603	CG43776,CG43777,tamo	2R:24116791-24133551	Wild Type	ZnF2 Mutant	OK	26.9566	11.5294	-1.22531	-2.05462	0.00185	0.0258343	yes
XLOC_000898	XLOC_000898	mre11	2L:11282089-11285706	Wild Type	ZnF2 Mutant	OK	64.987	34.361	-0.919378	-1.87163	0.00185	0.0258343	yes
XLOC_001902	XLOC_001902	CG31694	2L:2868626-2874489	Wild Type	ZnF2 Mutant	OK	25.4203	47.6603	0.906804	1.84413	0.00185	0.0258343	yes
XLOC_000505	XLOC_000505	CG31638	2L:6491060-6496988	Wild Type	ZnF2 Mutant	OK	7.57578	17.8016	1.23254	1.88798	0.00185	0.0258343	yes
XLOC_003144	XLOC_003144	phr6-4	2L:20643350-20645791	Wild Type	ZnF2 Mutant	OK	1.07826	6.45165	2.58096	2.23623	0.00185	0.0258343	yes
XLOC_005145	XLOC_005145	dpa	2R:7496701-7500145	Wild Type	ZnF2 Mutant	OK	29.6409	52.6305	0.82831	1.75582	0.0019	0.0263765	yes
XLOC_013140	XLOC_013140	DNApol-alpha180	3R:21664388-21671750	Wild Type	ZnF2 Mutant	OK	14.3701	27.2162	0.921393	1.82171	0.0019	0.0263765	yes
XLOC_000588	XLOC_000588	CG7191	2L:7767627-7775033	Wild Type	ZnF2 Mutant	OK	1.11256	7.85159	2.8191	2.65307	0.0019	0.0263765	yes
XLOC_000641	XLOC_000641	CG17292	2L:8370342-8374250	Wild Type	ZnF2 Mutant	OK	5.94677	1.25624	-2.243	-1.99713	0.00195	0.0266525	yes
XLOC_009145	XLOC_009145	CG6084	3L:11620534-11624381	Wild Type	ZnF2 Mutant	OK	15.5005	4.01213	-1.94987	-2.13356	0.00195	0.0266525	yes
XLOC_003083	XLOC_003083	scw	2L:19586622-19732069	Wild Type	ZnF2 Mutant	OK	162.111	44.096	-1.87826	-2.31366	0.00195	0.0266525	yes
XLOC_002433	XLOC_002433	CG31875,SoYb	2L:9995560-10002736	Wild Type	ZnF2 Mutant	OK	96.0932	38.4226	-1.32248	-1.91154	0.00195	0.0266525	yes
XLOC_013839	XLOC_013839	CG1746,mir-4949	3R:31216144-31219630	Wild Type	ZnF2 Mutant	OK	1046.08	675.189	-0.631632	-1.78508	0.00195	0.0266525	yes
XLOC_010407	XLOC_010407	CG12420	3R:10222697-10224725	Wild Type	ZnF2 Mutant	OK	128.446	235.373	0.873788	1.83903	0.00195	0.0266525	yes
XLOC_008680	XLOC_008680	CG18808,Dhc64C	3L:4806052-4825687	Wild Type	ZnF2 Mutant	OK	1.1025	2.68668	1.28505	1.85914	0.00195	0.0266525	yes
XLOC_012072	XLOC_012072	Gasp	3R:6088798-6100887	Wild Type	ZnF2 Mutant	OK	3.03242	11.41	1.91175	2.04008	0.00195	0.0266525	yes
XLOC_011101	XLOC_011101	bon	3R:20593138-20616901	Wild Type	ZnF2 Mutant	OK	13.1876	24.7938	0.910798	1.82287	0.002	0.0272308	yes
XLOC_013456	XLOC_013456	Npl4	3R:25611012-25624662	Wild Type	ZnF2 Mutant	OK	5.03059	13.3436	1.40735	1.87482	0.002	0.0272308	yes
XLOC_010341	XLOC_010341	alpha-Man-II	3R:9412547-9417264	Wild Type	ZnF2 Mutant	OK	6.38724	2.10867	-1.59886	-2.01309	0.00205	0.0275408	yes
XLOC_002324	XLOC_002324	Aats-ala	2L:8378261-8381764	Wild Type	ZnF2 Mutant	OK	9.11737	20.811	1.19066	1.93739	0.00205	0.0275408	yes
XLOC_010707	XLOC_010707	stumps	3R:14577216-14608079	Wild Type	ZnF2 Mutant	OK	6.28562	14.9758	1.2525	1.86909	0.00205	0.0275408	yes
XLOC_010249	XLOC_010249	CG7800	3R:8217956-8219734	Wild Type	ZnF2 Mutant	OK	3.7592	10.2737	1.45045	1.76324	0.00205	0.0275408	yes
XLOC_010979	XLOC_010979	Nup43	3R:18366637-18367913	Wild Type	ZnF2 Mutant	OK	6.50734	18.1897	1.48298	1.81164	0.00205	0.0275408	yes
XLOC_011252	XLOC_011252	CG6937	3R:22584772-22586625	Wild Type	ZnF2 Mutant	OK	6.86043	22.2599	1.69808	2.09368	0.00205	0.0275408	yes
XLOC_009148	XLOC_009148	CG6071	3L:11642905-11646033	Wild Type	ZnF2 Mutant	OK	0.163316	1.33738	3.03367	1.84651	0.00205	0.0275408	yes
XLOC_012821	XLOC_012821	Der-2	3R:16482693-16484223	Wild Type	ZnF2 Mutant	OK	50.0406	24.083	-1.05508	-1.80786	0.0021	0.0281059	yes
XLOC_011853	XLOC_011853	cindr	3R:30808616-30827005	Wild Type	ZnF2 Mutant	OK	5.60167	13.2266	1.23952	1.85007	0.0021	0.0281059	yes
XLOC_007378	XLOC_007378	dpr6	3L:9974650-10139360	Wild Type	ZnF2 Mutant	OK	3.7771	0.57965	-2.70403	-2.33741	0.00215	0.0283993	yes
XLOC_002605	XLOC_002605	JhI-21	2L:12049417-12056042	Wild Type	ZnF2 Mutant	OK	99.3347	57.088	-0.799111	-1.83256	0.00215	0.0283993	yes
XLOC_013164	XLOC_013164	CG6439	3R:22016390-22019382	Wild Type	ZnF2 Mutant	OK	254.653	159.603	-0.67405	-1.7762	0.00215	0.0283993	yes
XLOC_012736	XLOC_012736	Su(var)3-9,eIF-2gamma	3R:15257843-15263458	Wild Type	ZnF2 Mutant	OK	96.7774	161.029	0.734577	1.82481	0.00215	0.0283993	yes
XLOC_002211	XLOC_002211	ihog	2L:6945463-6948808	Wild Type	ZnF2 Mutant	OK	4.79676	11.5467	1.26734	1.84255	0.00215	0.0283993	yes
XLOC_001426	XLOC_001426	Top3alpha	2L:19498167-19502268	Wild Type	ZnF2 Mutant	OK	2.38338	6.16476	1.37104	1.82394	0.00215	0.0283993	yes
XLOC_009210	XLOC_009210	CG32104	3L:12393803-12399322	Wild Type	ZnF2 Mutant	OK	2.87896	7.4653	1.37465	1.8444	0.00215	0.0283993	yes
XLOC_002076	XLOC_002076	CG12512	2L:5339131-5342234	Wild Type	ZnF2 Mutant	OK	8.37023	2.66775	-1.64965	-1.89698	0.0022	0.0288444	yes
XLOC_002828	XLOC_002828	Ku80	2L:15768629-15771159	Wild Type	ZnF2 Mutant	OK	4.42021	11.1112	1.32983	1.75735	0.0022	0.0288444	yes
XLOC_011469	XLOC_011469	Nup37	3R:25247657-25249100	Wild Type	ZnF2 Mutant	OK	3.7062	13.0321	1.81406	1.88564	0.0022	0.0288444	yes
XLOC_011666	XLOC_011666	snoRNA:Or-aca3	3R:27922820-27937853	Wild Type	ZnF2 Mutant	OK	0	5.96891	inf	-nan	0.0022	0.0288444	yes
XLOC_003346	XLOC_003346	Pngl	2R:6017738-6023144	Wild Type	ZnF2 Mutant	OK	90.8161	49.276	-0.882064	-1.83846	0.00225	0.029337	yes
XLOC_010641	XLOC_010641	Droj2	3R:13382105-13385283	Wild Type	ZnF2 Mutant	OK	437.018	282.629	-0.628784	-1.80429	0.00225	0.029337	yes
XLOC_000983	XLOC_000983	pdm2	2L:12657164-12686306	Wild Type	ZnF2 Mutant	OK	8.45318	23.0115	1.44479	2.04059	0.00225	0.029337	yes
XLOC_012415	XLOC_012415	CG14694	3R:10858201-10859813	Wild Type	ZnF2 Mutant	OK	7.48281	1.37	-2.4494	-2.17738	0.0023	0.0298242	yes
XLOC_011745	XLOC_011745	CG15817	3R:29229160-29235302	Wild Type	ZnF2 Mutant	OK	45.6831	24.8893	-0.876135	-1.85413	0.0023	0.0298242	yes
XLOC_013561	XLOC_013561	CG6051	3R:27124758-27151069	Wild Type	ZnF2 Mutant	OK	78.5706	47.1642	-0.736299	-1.76321	0.0023	0.0298242	yes
XLOC_010226	XLOC_010226	CG2678	3R:7913850-7916550	Wild Type	ZnF2 Mutant	OK	36.0689	17.4571	-1.04694	-1.82786	0.00235	0.0301413	yes
XLOC_005174	XLOC_005174	Gapdh1	2R:7791900-7793380	Wild Type	ZnF2 Mutant	OK	60.4072	30.3283	-0.994056	-1.75286	0.00235	0.0301413	yes
XLOC_009089	XLOC_009089	JIL-1	3L:11078751-11093193	Wild Type	ZnF2 Mutant	OK	37.404	21.2235	-0.817532	-1.7532	0.00235	0.0301413	yes
XLOC_003024	XLOC_003024	Nak	2L:18957731-18968744	Wild Type	ZnF2 Mutant	OK	11.3652	22.422	0.980297	1.8749	0.00235	0.0301413	yes
XLOC_013068	XLOC_013068	Pi3K92E	3R:20628971-20634732	Wild Type	ZnF2 Mutant	OK	6.09948	12.7388	1.06248	1.79571	0.00235	0.0301413	yes
XLOC_010787	XLOC_010787	Arpc3A	3R:15834647-15836021	Wild Type	ZnF2 Mutant	OK	10.0806	27.3683	1.44092	1.79513	0.00235	0.0301413	yes
XLOC_008387	XLOC_008387	CG13894	3L:693082-699144	Wild Type	ZnF2 Mutant	OK	10.5635	3.26932	-1.69203	-1.9848	0.0024	0.0306162	yes
XLOC_007948	XLOC_007948	CG7271	3L:18588758-18590165	Wild Type	ZnF2 Mutant	OK	764.585	1120.97	0.551996	1.75808	0.0024	0.0306162	yes
XLOC_001787	XLOC_001787	CG17660	2L:1707131-1710421	Wild Type	ZnF2 Mutant	OK	6.69651	16.0624	1.26221	1.81062	0.0024	0.0306162	yes
XLOC_011236	XLOC_011236	lqfR	3R:22411300-22419051	Wild Type	ZnF2 Mutant	OK	37.41	21.386	-0.806761	-1.7281	0.00245	0.031086	yes
XLOC_010962	XLOC_010962	MED17	3R:18189071-18191967	Wild Type	ZnF2 Mutant	OK	11.0524	25.1247	1.18475	1.84845	0.00245	0.031086	yes
XLOC_005472	XLOC_005472	Tapdelta	2R:11370299-11371335	Wild Type	ZnF2 Mutant	OK	6.87494	21.7244	1.6599	1.83549	0.00245	0.031086	yes
XLOC_006235	XLOC_006235	plu	2R:20262957-20263684	Wild Type	ZnF2 Mutant	OK	58.0581	22.9549	-1.33869	-1.8331	0.0025	0.0314947	yes
XLOC_006354	XLOC_006354	PTP-ER	2R:21619320-21624446	Wild Type	ZnF2 Mutant	OK	18.8405	9.93472	-0.923289	-1.75571	0.0025	0.0314947	yes
XLOC_003181	XLOC_003181	E2f2	2L:21154292-21158611	Wild Type	ZnF2 Mutant	OK	21.4143	63.0827	1.55867	2.02809	0.0025	0.0314947	yes
XLOC_005076	XLOC_005076	Hsepi	2R:6670153-6673372	Wild Type	ZnF2 Mutant	OK	2.49288	7.58838	1.60598	1.84872	0.0025	0.0314947	yes
XLOC_007732	XLOC_007732	dop	3L:15566012-15576313	Wild Type	ZnF2 Mutant	OK	65.2157	41.1662	-0.663758	-1.77668	0.00255	0.0318975	yes
XLOC_011009	XLOC_011009	gukh	3R:18984024-19022436	Wild Type	ZnF2 Mutant	OK	6.41021	13.8912	1.11572	1.79258	0.00255	0.0318975	yes
XLOC_012599	XLOC_012599	CG9799	3R:13385647-13388709	Wild Type	ZnF2 Mutant	OK	5.08568	13.3789	1.39545	1.93947	0.00255	0.0318975	yes
XLOC_009824	XLOC_009824	CG33285,ko	3L:21075580-21131159	Wild Type	ZnF2 Mutant	OK	0.369126	2.45757	2.73505	2.0369	0.00255	0.0318975	yes
XLOC_004415	XLOC_004415	CG42855,Sik3	2R:18687371-18705805	Wild Type	ZnF2 Mutant	OK	7.40858	1.91732	-1.9501	-1.92142	0.0026	0.0321257	yes
XLOC_013009	XLOC_013009	subdued	3R:19633417-19642722	Wild Type	ZnF2 Mutant	OK	5.65383	1.79364	-1.65634	-1.86611	0.0026	0.0321257	yes
XLOC_005784	XLOC_005784	dup	2R:15376618-15387851	Wild Type	ZnF2 Mutant	OK	178.98	106.715	-0.746032	-1.75534	0.0026	0.0321257	yes
XLOC_005081	XLOC_005081	Mob4	2R:6693429-6696661	Wild Type	ZnF2 Mutant	OK	37.8696	73.6808	0.960249	1.78222	0.0026	0.0321257	yes
XLOC_006007	XLOC_006007	Nup75	2R:18160719-18167140	Wild Type	ZnF2 Mutant	OK	18.9047	42.3832	1.16475	1.88759	0.0026	0.0321257	yes
XLOC_011073	XLOC_011073	MED25	3R:20008946-20011712	Wild Type	ZnF2 Mutant	OK	4.75538	11.7234	1.30176	1.75825	0.0026	0.0321257	yes
XLOC_004776	XLOC_004776	CG13532	2R:22871189-22874427	Wild Type	ZnF2 Mutant	OK	1.24087	5.84149	2.23498	1.93008	0.0026	0.0321257	yes
XLOC_000172	XLOC_000172	CG4267,CR42859	2L:2242377-2247383	Wild Type	ZnF2 Mutant	OK	6.42085	1.28326	-2.32295	-1.91706	0.00265	0.0325729	yes
XLOC_011084	XLOC_011084	cic	3R:20252769-20303942	Wild Type	ZnF2 Mutant	OK	72.7716	45.274	-0.684693	-1.73655	0.00265	0.0325729	yes
XLOC_002562	XLOC_002562	salm	2L:11434310-11445614	Wild Type	ZnF2 Mutant	OK	16.554	29.1086	0.814265	1.75112	0.00265	0.0325729	yes
XLOC_004720	XLOC_004720	Rtf1	2R:22375089-22379007	Wild Type	ZnF2 Mutant	OK	61.2182	33.8865	-0.853251	-1.77204	0.0027	0.03313	yes
XLOC_000319	XLOC_000319	ed	2L:4031376-4115749	Wild Type	ZnF2 Mutant	OK	127.751	84.1329	-0.602588	-1.69278	0.00275	0.0336851	yes
XLOC_005451	XLOC_005451	Cpr47Eg	2R:11277956-11278445	Wild Type	ZnF2 Mutant	OK	10.0835	1.16928	-3.1083	-1.95602	0.0028	0.0338294	yes
XLOC_004907	XLOC_004907	nvy	2R:24275733-24291084	Wild Type	ZnF2 Mutant	OK	3.13704	0.531071	-2.56243	-2.1796	0.0028	0.0338294	yes
XLOC_004101	XLOC_004101	Vha36-1	2R:15541434-15542498	Wild Type	ZnF2 Mutant	OK	31.8331	12.1832	-1.38564	-1.88449	0.0028	0.0338294	yes
XLOC_003473	XLOC_003473	sax	2R:7806483-7810067	Wild Type	ZnF2 Mutant	OK	44.964	24.2043	-0.893508	-1.74954	0.0028	0.0338294	yes
XLOC_007541	XLOC_007541	CG32100	3L:12267527-12271345	Wild Type	ZnF2 Mutant	OK	11.3565	24.2665	1.09544	1.70761	0.0028	0.0338294	yes
XLOC_006653	XLOC_006653	Eps-15	2R:24768313-24775265	Wild Type	ZnF2 Mutant	OK	5.23649	11.5383	1.13976	1.81794	0.0028	0.0338294	yes
XLOC_000459	XLOC_000459	CG9044	2L:5949449-5955235	Wild Type	ZnF2 Mutant	OK	2.78606	6.84594	1.29702	1.81571	0.0028	0.0338294	yes
XLOC_003391	XLOC_003391	CG15236	2R:6828355-6839055	Wild Type	ZnF2 Mutant	OK	0.62094	2.59698	2.06431	2.05031	0.0028	0.0338294	yes
XLOC_002142	XLOC_002142	CG9175	2L:6096697-6098966	Wild Type	ZnF2 Mutant	OK	11.1056	3.67209	-1.59661	-1.91471	0.00285	0.0340845	yes
XLOC_001912	XLOC_001912	alpha4GT1	2L:3018507-3023141	Wild Type	ZnF2 Mutant	OK	51.8479	25.8483	-1.00422	-1.82466	0.00285	0.0340845	yes
XLOC_001790	XLOC_001790	Eno	2L:1724767-1729762	Wild Type	ZnF2 Mutant	OK	94.9605	50.3376	-0.91569	-1.83524	0.00285	0.0340845	yes
XLOC_012174	XLOC_012174	alpha-Est5	3R:7533495-7536390	Wild Type	ZnF2 Mutant	OK	50.5174	26.8058	-0.914237	-1.72143	0.00285	0.0340845	yes
XLOC_004353	XLOC_004353	Pcl	2R:18135425-18139990	Wild Type	ZnF2 Mutant	OK	24.67	43.5253	0.819099	1.75859	0.00285	0.0340845	yes
XLOC_006604	XLOC_006604	CG4065	2R:24133988-24138050	Wild Type	ZnF2 Mutant	OK	1.29573	7.2615	2.4865	2.19393	0.00285	0.0340845	yes
XLOC_001932	XLOC_001932	E23	2L:3334874-3354829	Wild Type	ZnF2 Mutant	OK	2.56646	0.520688	-2.30129	-1.97188	0.0029	0.0344497	yes
XLOC_001744	XLOC_001744	aru	2L:861848-868354	Wild Type	ZnF2 Mutant	OK	4.5608	10.4413	1.19494	1.77408	0.0029	0.0344497	yes
XLOC_009612	XLOC_009612	rpr	3L:18397534-18398435	Wild Type	ZnF2 Mutant	OK	11.2235	27.4124	1.28831	1.68891	0.0029	0.0344497	yes
XLOC_005276	XLOC_005276	FANCI	2R:8934575-8939789	Wild Type	ZnF2 Mutant	OK	2.49672	6.22292	1.31756	1.8038	0.0029	0.0344497	yes
XLOC_004860	XLOC_004860	Tal	2R:23940409-23942114	Wild Type	ZnF2 Mutant	OK	28.0775	12.521	-1.16507	-1.65224	0.00295	0.0349264	yes
XLOC_003325	XLOC_003325	CR42646	2R:5363252-5367357	Wild Type	ZnF2 Mutant	OK	1.44749	4.85714	1.74655	1.91645	0.00295	0.0349264	yes
XLOC_002320	XLOC_002320	CG7627	2L:8355677-8362469	Wild Type	ZnF2 Mutant	OK	2.1121	0.612337	-1.78628	-1.69937	0.003	0.0354	yes
XLOC_002104	XLOC_002104	CG9171	2L:5767001-5800253	Wild Type	ZnF2 Mutant	OK	12.376	4.81322	-1.36247	-1.90291	0.003	0.0354	yes
XLOC_004006	XLOC_004006	CG8613	2R:14352230-14355674	Wild Type	ZnF2 Mutant	OK	1.4277	5.35282	1.90661	1.96629	0.00305	0.0358704	yes
XLOC_004609	XLOC_004609	RIC-3	2R:21017783-21024918	Wild Type	ZnF2 Mutant	OK	0.657895	2.80019	2.08959	1.57352	0.00305	0.0358704	yes
XLOC_008409	XLOC_008409	trio	3L:995981-1036298	Wild Type	ZnF2 Mutant	OK	52.8039	28.2668	-0.901535	-1.78436	0.0031	0.0362178	yes
XLOC_004823	XLOC_004823	CG30184,Pi3K59F	2R:23560491-23564780	Wild Type	ZnF2 Mutant	OK	3.63852	9.13198	1.32757	1.76029	0.0031	0.0362178	yes
XLOC_010846	XLOC_010846	CG42342	3R:16502769-16571363	Wild Type	ZnF2 Mutant	OK	0.866306	3.44539	1.99172	1.94382	0.0031	0.0362178	yes
XLOC_013727	XLOC_013727	Cog7	3R:29930550-29933057	Wild Type	ZnF2 Mutant	OK	1.00707	4.74172	2.23524	2.0197	0.0031	0.0362178	yes
XLOC_005849	XLOC_005849	Khc	2R:16266959-16271971	Wild Type	ZnF2 Mutant	OK	40.6727	22.145	-0.877081	-1.77401	0.00315	0.0367414	yes
XLOC_007976	XLOC_007976	Ugt	3L:18872746-18878245	Wild Type	ZnF2 Mutant	OK	33.5959	19.5394	-0.781899	-1.73849	0.0032	0.0369592	yes
XLOC_005073	XLOC_005073	geminin	2R:6655462-6656594	Wild Type	ZnF2 Mutant	OK	655.3	428.441	-0.613057	-1.70101	0.0032	0.0369592	yes
XLOC_011669	XLOC_011669	Gp93	3R:27948710-27954112	Wild Type	ZnF2 Mutant	OK	249.764	166.845	-0.582056	-1.66277	0.0032	0.0369592	yes
XLOC_008143	XLOC_008143	asparagine-synthetase	3L:21172852-21183278	Wild Type	ZnF2 Mutant	OK	99.9396	185.156	0.889617	1.76013	0.0032	0.0369592	yes
XLOC_003044	XLOC_003044	l(2)37Cb	2L:19123997-19126976	Wild Type	ZnF2 Mutant	OK	5.58668	13.1947	1.2399	1.82043	0.0032	0.0369592	yes
XLOC_005875	XLOC_005875	CG8306	2R:16589517-16594646	Wild Type	ZnF2 Mutant	OK	3.62957	10.0586	1.47056	1.85834	0.0032	0.0369592	yes
XLOC_005386	XLOC_005386	CG42732	2R:10322194-10416996	Wild Type	ZnF2 Mutant	OK	2.60212	0.732733	-1.82833	-1.89581	0.00325	0.037233	yes
XLOC_009143	XLOC_009143	CG6091	3L:11605435-11609465	Wild Type	ZnF2 Mutant	OK	16.6195	32.306	0.958923	1.7423	0.00325	0.037233	yes
XLOC_008427	XLOC_008427	CG2211	3L:1333238-1339415	Wild Type	ZnF2 Mutant	OK	20.1919	46.9963	1.21877	1.87566	0.00325	0.037233	yes
XLOC_008465	XLOC_008465	Oseg4,drpr	3L:1715594-1735767	Wild Type	ZnF2 Mutant	OK	3.11911	8.98965	1.52713	1.99116	0.00325	0.037233	yes
XLOC_005888	XLOC_005888	Acp53C14c,CG42392,unc-104	2R:16750775-16772671	Wild Type	ZnF2 Mutant	OK	0.598118	1.78314	1.57592	1.54119	0.00325	0.037233	yes
XLOC_006395	XLOC_006395	CG2921	2R:22073537-22075308	Wild Type	ZnF2 Mutant	OK	31.6706	14.4995	-1.12714	-1.75821	0.0033	0.0375627	yes
XLOC_008452	XLOC_008452	metl	3L:1637941-1639235	Wild Type	ZnF2 Mutant	OK	53.6161	98.6694	0.879936	1.71135	0.0033	0.0375627	yes
XLOC_002861	XLOC_002861	CG5869	2L:16299942-16302954	Wild Type	ZnF2 Mutant	OK	22.2467	55.3406	1.31475	1.84151	0.0033	0.0375627	yes
XLOC_010371	XLOC_010371	CG8417	3R:9759621-9761208	Wild Type	ZnF2 Mutant	OK	2.38137	8.16476	1.77762	1.76157	0.0033	0.0375627	yes
XLOC_007495	XLOC_007495	Bmcp	3L:11720933-11728118	Wild Type	ZnF2 Mutant	OK	11.9045	4.3384	-1.45627	-1.68403	0.00335	0.0379488	yes
XLOC_010034	XLOC_010034	CR45033,Hph	3R:5257036-5269507	Wild Type	ZnF2 Mutant	OK	14.3223	33.3544	1.21961	1.49992	0.00335	0.0379488	yes
XLOC_012047	XLOC_012047	Rab23	3R:5680053-5685434	Wild Type	ZnF2 Mutant	OK	6.08372	14.1876	1.2216	1.77199	0.00335	0.0379488	yes
XLOC_000800	XLOC_000800	CG4972	2L:10314791-10324990	Wild Type	ZnF2 Mutant	OK	14.9098	6.1891	-1.26846	-1.76571	0.0034	0.0382703	yes
XLOC_001054	XLOC_001054	kuz,mir-2489	2L:13550138-13639411	Wild Type	ZnF2 Mutant	OK	60.1894	37.7614	-0.672596	-1.70838	0.0034	0.0382703	yes
XLOC_001404	XLOC_001404	drl	2L:19190341-19208621	Wild Type	ZnF2 Mutant	OK	1.8302	5.24572	1.51914	1.69485	0.0034	0.0382703	yes
XLOC_010567	XLOC_010567	CG5196	3R:12408315-12411768	Wild Type	ZnF2 Mutant	OK	5.22486	15.5189	1.57056	1.99563	0.0034	0.0382703	yes
XLOC_011154	XLOC_011154	Nelf-A	3R:21219076-21229512	Wild Type	ZnF2 Mutant	OK	17.9217	34.5424	0.946665	1.78663	0.00345	0.0387714	yes
XLOC_013020	XLOC_013020	CG4572	3R:19861609-19864393	Wild Type	ZnF2 Mutant	OK	172.841	107.185	-0.689339	-1.66959	0.0035	0.0391469	yes
XLOC_008623	XLOC_008623	RfC4	3L:4134859-4136038	Wild Type	ZnF2 Mutant	OK	6.70956	18.2424	1.443	1.71089	0.0035	0.0391469	yes
XLOC_009957	XLOC_009957	CR45181	3L:27135423-27136049	Wild Type	ZnF2 Mutant	OK	2.97477	13.2909	2.15959	1.77225	0.0035	0.0391469	yes
XLOC_003541	XLOC_003541	Cirl	2R:8614721-8625203	Wild Type	ZnF2 Mutant	OK	36.6011	21.7705	-0.74951	-1.69217	0.0036	0.0398873	yes
XLOC_006287	XLOC_006287	insc,sktl	2R:20821261-20836028	Wild Type	ZnF2 Mutant	OK	22.1634	41.3005	0.897979	1.78033	0.0036	0.0398873	yes
XLOC_012395	XLOC_012395	CG14688	3R:10677736-10680925	Wild Type	ZnF2 Mutant	OK	37.9326	71.3187	0.910842	1.68456	0.0036	0.0398873	yes
XLOC_003918	XLOC_003918	Su(z)2	2R:12996500-13007911	Wild Type	ZnF2 Mutant	OK	0.266093	1.1737	2.14107	1.91765	0.0036	0.0398873	yes
XLOC_009951	XLOC_009951	CG17374	3L:25752858-25762779	Wild Type	ZnF2 Mutant	OK	0.0438216	0.390537	3.15575	1.88901	0.0036	0.0398873	yes
XLOC_001323	XLOC_001323	ninaD	2L:18081627-18083608	Wild Type	ZnF2 Mutant	OK	0.395624	0	-inf	-nan	0.0036	0.0398873	yes
XLOC_008212	XLOC_008212	mub	3L:21844787-21932702	Wild Type	ZnF2 Mutant	OK	17.9682	7.90296	-1.18498	-1.7776	0.00365	0.0402523	yes
XLOC_002855	XLOC_002855	PRL-1	2L:16245834-16257606	Wild Type	ZnF2 Mutant	OK	116.915	73.4106	-0.671394	-1.68046	0.00365	0.0402523	yes
XLOC_007249	XLOC_007249	Cbl	3L:8424953-8432246	Wild Type	ZnF2 Mutant	OK	195.139	129.569	-0.590783	-1.64265	0.00365	0.0402523	yes
XLOC_013348	XLOC_013348	CG5746	3R:24343894-24348791	Wild Type	ZnF2 Mutant	OK	60.8558	34.5444	-0.816946	-1.74738	0.00375	0.0410991	yes
XLOC_008845	XLOC_008845	CG8602	3L:7326272-7328842	Wild Type	ZnF2 Mutant	OK	124.681	78.4253	-0.668852	-1.68385	0.00375	0.0410991	yes
XLOC_002554	XLOC_002554	cmet	2L:11210677-11269002	Wild Type	ZnF2 Mutant	OK	4.85113	9.57369	0.980753	1.71514	0.00375	0.0410991	yes
XLOC_009270	XLOC_009270	CR43912	3L:13290593-13291770	Wild Type	ZnF2 Mutant	OK	0	0.573925	inf	-nan	0.00375	0.0410991	yes
XLOC_011171	XLOC_011171	CG7956	3R:21520927-21528598	Wild Type	ZnF2 Mutant	OK	8.01668	16.4724	1.03897	1.79858	0.0038	0.0415827	yes
XLOC_000552	XLOC_000552	CG4495	2L:7182233-7190010	Wild Type	ZnF2 Mutant	OK	107.715	64.2082	-0.746394	-1.68537	0.00385	0.0420648	yes
XLOC_000540	XLOC_000540	Coprox	2L:6964420-6965887	Wild Type	ZnF2 Mutant	OK	12.1274	28.3924	1.22723	1.80169	0.0039	0.0425455	yes
XLOC_011102	XLOC_011102	CG5466	3R:20617882-20621269	Wild Type	ZnF2 Mutant	OK	12.3068	5.41752	-1.18375	-1.73478	0.00395	0.0427615	yes
XLOC_012718	XLOC_012718	CG6966,CG6974	3R:15078529-15095631	Wild Type	ZnF2 Mutant	OK	14.4238	6.9187	-1.05988	-1.69174	0.00395	0.0427615	yes
XLOC_001018	XLOC_001018	CG16815	2L:13229831-13230549	Wild Type	ZnF2 Mutant	OK	84.6665	42.7291	-0.986573	-1.65419	0.00395	0.0427615	yes
XLOC_010793	XLOC_010793	CG4221	3R:15920897-15933734	Wild Type	ZnF2 Mutant	OK	18.724	35.6101	0.927401	1.72657	0.00395	0.0427615	yes
XLOC_007300	XLOC_007300	CG5144	3L:9047438-9048724	Wild Type	ZnF2 Mutant	OK	8.94884	22.5481	1.33324	1.82561	0.00395	0.0427615	yes
XLOC_013664	XLOC_013664	dgt6	3R:29128583-29130972	Wild Type	ZnF2 Mutant	OK	43.3247	74.3053	0.778275	1.68305	0.004	0.0431707	yes
XLOC_003811	XLOC_003811	RpIII128	2R:12039040-12042623	Wild Type	ZnF2 Mutant	OK	3.85429	8.74176	1.18146	1.7005	0.004	0.0431707	yes
XLOC_000996	XLOC_000996	Vha68-2	2L:12974321-12978607	Wild Type	ZnF2 Mutant	OK	53.5851	30.1531	-0.829524	-1.69044	0.00405	0.0433797	yes
XLOC_006310	XLOC_006310	CG4050	2R:21123734-21128510	Wild Type	ZnF2 Mutant	OK	7.57047	16.0991	1.08853	1.73663	0.00405	0.0433797	yes
XLOC_010414	XLOC_010414	sle	3R:10333114-10338265	Wild Type	ZnF2 Mutant	OK	2.33733	6.06262	1.37508	1.81094	0.00405	0.0433797	yes
XLOC_013877	XLOC_013877	FeCH	3R:31810459-31812296	Wild Type	ZnF2 Mutant	OK	5.05923	14.4171	1.51079	1.80708	0.00405	0.0433797	yes
XLOC_010482	XLOC_010482	CG5270	3R:11422091-11429969	Wild Type	ZnF2 Mutant	OK	0.657759	1.93175	1.55427	1.70855	0.00405	0.0433797	yes
XLOC_002009	XLOC_002009	CG15440	2L:4453168-4454453	Wild Type	ZnF2 Mutant	OK	48.6707	88.8425	0.868195	1.68001	0.00415	0.0443167	yes
XLOC_013322	XLOC_013322	Atg6	3R:24049179-24050782	Wild Type	ZnF2 Mutant	OK	11.915	26.8368	1.17143	1.70672	0.00415	0.0443167	yes
XLOC_000276	XLOC_000276	CG17593	2L:3514871-3517264	Wild Type	ZnF2 Mutant	OK	57.8968	31.6863	-0.869626	-1.669	0.0042	0.0447158	yes
XLOC_000986	XLOC_000986	spict	2L:12704724-12706683	Wild Type	ZnF2 Mutant	OK	4.59704	12.4664	1.43927	1.63065	0.0042	0.0447158	yes
XLOC_006034	XLOC_006034	SP2637	2R:18640861-18658222	Wild Type	ZnF2 Mutant	OK	45.4018	21.9939	-1.04565	-1.71291	0.00425	0.0449776	yes
XLOC_011738	XLOC_011738	CG11897	3R:29158121-29164966	Wild Type	ZnF2 Mutant	OK	70.8413	45.053	-0.652969	-1.6435	0.00425	0.0449776	yes
XLOC_008037	XLOC_008037	Papss	3L:19845292-19860925	Wild Type	ZnF2 Mutant	OK	2.84576	8.87104	1.64029	1.83801	0.00425	0.0449776	yes
XLOC_004780	XLOC_004780	nahoda	2R:22896173-22916719	Wild Type	ZnF2 Mutant	OK	0.634505	2.22703	1.81142	1.78302	0.00425	0.0449776	yes
XLOC_002488	XLOC_002488	CG7384	2L:10507080-10510453	Wild Type	ZnF2 Mutant	OK	29.7983	13.6163	-1.12989	-1.7726	0.0043	0.0453036	yes
XLOC_013195	XLOC_013195	CG5346	3R:22520086-22528663	Wild Type	ZnF2 Mutant	OK	9.41704	21.5312	1.19308	1.76006	0.0043	0.0453036	yes
XLOC_013350	XLOC_013350	CG18528	3R:24358094-24360144	Wild Type	ZnF2 Mutant	OK	3.79807	11.3443	1.57863	1.81164	0.0043	0.0453036	yes
XLOC_009690	XLOC_009690	CG9279	3L:19538424-19544172	Wild Type	ZnF2 Mutant	OK	2.67739	6.617	1.30535	1.80738	0.00435	0.0456944	yes
XLOC_001026	XLOC_001026	CG44085	2L:13261007-13286538	Wild Type	ZnF2 Mutant	OK	0.0842105	0.904661	3.42531	1.18439	0.00435	0.0456944	yes
XLOC_012710	XLOC_012710	CG7265	3R:14892391-14893954	Wild Type	ZnF2 Mutant	OK	49.6673	84.8569	0.772736	1.601	0.0044	0.0460828	yes
XLOC_009378	XLOC_009378	Msh6	3L:15147136-15158562	Wild Type	ZnF2 Mutant	OK	2.14895	5.64275	1.39277	1.72228	0.0044	0.0460828	yes
XLOC_012714	XLOC_012714	VhaPPA1-1	3R:14902329-14904061	Wild Type	ZnF2 Mutant	OK	92.7415	53.4015	-0.796333	-1.64258	0.00445	0.0465377	yes
XLOC_009604	XLOC_009604	Cyp312a1	3L:18128939-18132689	Wild Type	ZnF2 Mutant	OK	5.31414	0.639758	-3.05424	-2.17852	0.0045	0.0467155	yes
XLOC_007202	XLOC_007202	CG32365	3L:7869041-7894814	Wild Type	ZnF2 Mutant	OK	21.0452	8.28415	-1.34507	-1.72828	0.0045	0.0467155	yes
XLOC_003281	XLOC_003281	CG40006	2L:22622416-22756349	Wild Type	ZnF2 Mutant	OK	16.7705	7.16557	-1.22677	-1.71835	0.0045	0.0467155	yes
XLOC_002421	XLOC_002421	Etl1	2L:9908829-9912608	Wild Type	ZnF2 Mutant	OK	7.39352	15.0355	1.02404	1.61244	0.0045	0.0467155	yes
XLOC_003840	XLOC_003840	garz	2R:12326359-12333860	Wild Type	ZnF2 Mutant	OK	2.92932	6.1949	1.08051	1.63217	0.0045	0.0467155	yes
XLOC_010485	XLOC_010485	CG5281	3R:11435849-11437523	Wild Type	ZnF2 Mutant	OK	5.09741	15.6131	1.61492	1.88734	0.00455	0.0471654	yes
XLOC_010275	XLOC_010275	CG11737	3R:8517867-8521378	Wild Type	ZnF2 Mutant	OK	13.6996	6.26672	-1.12835	-1.57847	0.0046	0.047614	yes
XLOC_004481	XLOC_004481	mei-W68,par-1	2R:19456169-19486837	Wild Type	ZnF2 Mutant	OK	62.8501	30.2345	-1.05572	-1.81356	0.00465	0.0478517	yes
XLOC_011344	XLOC_011344	CG5991	3R:24050782-24053592	Wild Type	ZnF2 Mutant	OK	50.0356	27.9066	-0.842346	-1.62603	0.00465	0.0478517	yes
XLOC_006688	XLOC_006688	mthl8	3L:22427-26308	Wild Type	ZnF2 Mutant	OK	3.82711	9.16745	1.26026	1.69707	0.00465	0.0478517	yes
XLOC_004069	XLOC_004069	hbs	2R:15011395-15042134	Wild Type	ZnF2 Mutant	OK	0.393453	1.91139	2.28036	2.04794	0.00465	0.0478517	yes
XLOC_011461	XLOC_011461	CG13653	3R:25195526-25196531	Wild Type	ZnF2 Mutant	OK	29.0059	10.7386	-1.43354	-1.74298	0.0047	0.0480173	yes
XLOC_000341	XLOC_000341	l(2)k05819	2L:4394195-4400487	Wild Type	ZnF2 Mutant	OK	1.61127	4.39061	1.44622	1.7872	0.0047	0.0480173	yes
XLOC_011493	XLOC_011493	CG42488,CG5116	3R:25483097-25490936	Wild Type	ZnF2 Mutant	OK	5.26078	15.7116	1.57848	1.87887	0.0047	0.0480173	yes
XLOC_008580	XLOC_008580	sty	3L:3401152-3424935	Wild Type	ZnF2 Mutant	OK	1.38217	4.56615	1.72404	1.9566	0.0047	0.0480173	yes
XLOC_008534	XLOC_008534	Tet	3L:2786206-2879158	Wild Type	ZnF2 Mutant	OK	0.117571	1.77696	3.91781	3.23195	0.0047	0.0480173	yes
XLOC_001756	XLOC_001756	mtRNApol	2L:1103253-1108373	Wild Type	ZnF2 Mutant	OK	6.56145	2.53318	-1.37306	-1.73611	0.0048	0.0486877	yes
XLOC_008885	XLOC_008885	pbl	3L:7896108-7911954	Wild Type	ZnF2 Mutant	OK	94.7638	147.829	0.641524	1.66033	0.0048	0.0486877	yes
XLOC_009423	XLOC_009423	Pka-C3	3L:15925804-15954797	Wild Type	ZnF2 Mutant	OK	45.9651	79.2047	0.785046	1.67563	0.0048	0.0486877	yes
XLOC_008819	XLOC_008819	sgl	3L:6958345-6964758	Wild Type	ZnF2 Mutant	OK	19.3284	37.0703	0.93954	1.66962	0.0048	0.0486877	yes
XLOC_003815	XLOC_003815	CG18343	2R:12138694-12140229	Wild Type	ZnF2 Mutant	OK	35.7812	76.6809	1.09967	1.67556	0.0048	0.0486877	yes
XLOC_012291	XLOC_012291	ird1	3R:9240756-9245869	Wild Type	ZnF2 Mutant	OK	10.5814	19.9309	0.913473	1.62686	0.00485	0.0490543	yes
XLOC_012195	XLOC_012195	CG10445	3R:7916598-7920299	Wild Type	ZnF2 Mutant	OK	0.92754	3.83305	2.04701	1.93869	0.00485	0.0490543	yes
XLOC_008533	XLOC_008533	CG12093	3L:2772559-2774007	Wild Type	ZnF2 Mutant	OK	4.90214	13.7166	1.48443	1.66065	0.0049	0.0494893	yes
XLOC_005970	XLOC_005970	rdgBbeta	2R:17695775-17698796	Wild Type	ZnF2 Mutant	OK	29.8824	13.2303	-1.17545	-1.70415	0.00495	0.0497813	yes
XLOC_009551	XLOC_009551	CR45165,Edc3	3L:17525332-17546660	Wild Type	ZnF2 Mutant	OK	110.279	67.4207	-0.709896	-1.46843	0.00495	0.0497813	yes
XLOC_000819	XLOC_000819	Klp31E	2L:10414016-10418991	Wild Type	ZnF2 Mutant	OK	14.106	25.8879	0.875971	1.68297	0.00495	0.0497813	yes
XLOC_006313	XLOC_006313	CG30389	2R:21148264-21160545	Wild Type	ZnF2 Mutant	OK	7.36082	14.549	0.982983	1.69007	0.005	0.0500707	no
XLOC_002338	XLOC_002338	D12	2L:8434057-8437365	Wild Type	ZnF2 Mutant	OK	4.44305	10.4874	1.23904	1.69106	0.005	0.0500707	no
XLOC_012334	XLOC_012334	Unc-115a	3R:9693078-9705417	Wild Type	ZnF2 Mutant	OK	1.75842	6.85447	1.96276	2.02538	0.005	0.0500707	no
XLOC_013687	XLOC_013687	CG2310	3R:29491523-29493518	Wild Type	ZnF2 Mutant	OK	137.458	80.0246	-0.780477	-1.67326	0.00505	0.0503577	no
XLOC_005673	XLOC_005673	shot	2R:13864236-13942110	Wild Type	ZnF2 Mutant	OK	9.95602	5.8137	-0.776113	-1.61967	0.00505	0.0503577	no
XLOC_012483	XLOC_012483	glo	3R:11815205-11819339	Wild Type	ZnF2 Mutant	OK	409.051	581.959	0.508638	1.60907	0.00505	0.0503577	no
XLOC_002367	XLOC_002367	C1GalTA	2L:8943454-8951216	Wild Type	ZnF2 Mutant	OK	1.80737	0.283265	-2.67367	-1.7986	0.0051	0.0504302	no
XLOC_009650	XLOC_009650	CG18135,CG3808	3L:18990025-19000608	Wild Type	ZnF2 Mutant	OK	35.9221	19.0634	-0.914064	-1.69448	0.0051	0.0504302	no
XLOC_013214	XLOC_013214	CG4813	3R:22724883-22726414	Wild Type	ZnF2 Mutant	OK	8.25975	19.052	1.20577	1.63222	0.0051	0.0504302	no
XLOC_013317	XLOC_013317	CG13603	3R:23985212-23986569	Wild Type	ZnF2 Mutant	OK	5.68489	15.9881	1.4918	1.71995	0.0051	0.0504302	no
XLOC_012189	XLOC_012189	CG2993	3R:7804664-7810014	Wild Type	ZnF2 Mutant	OK	1.69935	4.88208	1.52251	1.71193	0.0051	0.0504302	no
XLOC_009532	XLOC_009532	CR44564	3L:17335920-17337097	Wild Type	ZnF2 Mutant	OK	0.377645	2.78176	2.8809	1.62533	0.0051	0.0504302	no
XLOC_010270	XLOC_010270	DppIII	3R:8344399-8347465	Wild Type	ZnF2 Mutant	OK	4.75383	11.1324	1.2276	1.69554	0.0052	0.0513473	no
XLOC_001017	XLOC_001017	CG16813	2L:13227528-13228521	Wild Type	ZnF2 Mutant	OK	14.8141	1.44053	-3.3623	-2.26841	0.00525	0.0517688	no
XLOC_012436	XLOC_012436	Ugt35a	3R:11170816-11172664	Wild Type	ZnF2 Mutant	OK	4.42334	1.05196	-2.07206	-1.79987	0.00535	0.0524626	no
XLOC_005763	XLOC_005763	GPHR	2R:15199064-15201200	Wild Type	ZnF2 Mutant	OK	37.2149	19.9774	-0.897515	-1.56652	0.00535	0.0524626	no
XLOC_010972	XLOC_010972	Tgs1	3R:18255529-18257677	Wild Type	ZnF2 Mutant	OK	4.57099	11.8221	1.37091	1.71962	0.00535	0.0524626	no
XLOC_004454	XLOC_004454	wbl	2R:19249394-19250917	Wild Type	ZnF2 Mutant	OK	0	0.747562	inf	-nan	0.00535	0.0524626	no
XLOC_006679	XLOC_006679	zip	2R:24990569-25011965	Wild Type	ZnF2 Mutant	OK	57.8915	87.1237	0.589714	1.63031	0.0054	0.0528797	no
XLOC_006094	XLOC_006094	CG15905	2R:19646482-19647645	Wild Type	ZnF2 Mutant	OK	6.13214	0.795961	-2.94562	-1.96878	0.00545	0.0531488	no
XLOC_007408	XLOC_007408	CG11811	3L:10691023-10694108	Wild Type	ZnF2 Mutant	OK	99.6301	47.36	-1.07291	-1.8122	0.00545	0.0531488	no
XLOC_002873	XLOC_002873	dac	2L:16466511-16485998	Wild Type	ZnF2 Mutant	OK	0.963917	3.10583	1.688	1.75917	0.00545	0.0531488	no
XLOC_009330	XLOC_009330	bbg	3L:14412827-14536276	Wild Type	ZnF2 Mutant	OK	2.52825	6.31804	1.32134	1.69473	0.0055	0.0535626	no
XLOC_008441	XLOC_008441	CG12091	3L:1534928-1536835	Wild Type	ZnF2 Mutant	OK	14.1041	29.6748	1.07312	1.65689	0.00555	0.0539753	no
XLOC_011770	XLOC_011770	Kul	3R:29725829-29736745	Wild Type	ZnF2 Mutant	OK	3.10965	0.569048	-2.45013	-1.81489	0.0056	0.054238	no
XLOC_005830	XLOC_005830	Ext2	2R:16143146-16148719	Wild Type	ZnF2 Mutant	OK	20.107	7.03067	-1.51596	-1.73853	0.0056	0.054238	no
XLOC_012254	XLOC_012254	p	3R:8660902-8663899	Wild Type	ZnF2 Mutant	OK	4.30026	10.1163	1.23418	1.70994	0.0056	0.054238	no
XLOC_013442	XLOC_013442	Fur1	3R:25347430-25473058	Wild Type	ZnF2 Mutant	OK	51.637	31.4946	-0.713299	-1.6092	0.0057	0.0549809	no
XLOC_009023	XLOC_009023	SH3PX1	3L:9710421-9713827	Wild Type	ZnF2 Mutant	OK	8.21943	18.011	1.13177	1.66723	0.0057	0.0549809	no
XLOC_012838	XLOC_012838	abd-A	3R:16807213-16830049	Wild Type	ZnF2 Mutant	OK	1.30303	3.7313	1.5178	1.69839	0.0057	0.0549809	no
XLOC_013080	XLOC_013080	CG17270	3R:20816444-20818929	Wild Type	ZnF2 Mutant	OK	13.3323	2.23397	-2.57725	-2.0511	0.00575	0.0552374	no
XLOC_007838	XLOC_007838	CG4169	3L:16584123-16587057	Wild Type	ZnF2 Mutant	OK	23.663	47.8717	1.01654	1.61083	0.00575	0.0552374	no
XLOC_001702	XLOC_001702	CG3645	2L:252588-271744	Wild Type	ZnF2 Mutant	OK	12.5428	27.8803	1.15239	1.68052	0.00575	0.0552374	no
XLOC_006327	XLOC_006327	CG30392	2R:21290913-21292181	Wild Type	ZnF2 Mutant	OK	8.01922	1.97979	-2.01811	-1.85272	0.00585	0.0558947	no
XLOC_008699	XLOC_008699	shep	3L:5155820-5277944	Wild Type	ZnF2 Mutant	OK	15.1165	6.79768	-1.15301	-1.70149	0.00585	0.0558947	no
XLOC_003014	XLOC_003014	CG10600,CG31752	2L:18833709-18841310	Wild Type	ZnF2 Mutant	OK	12.9916	22.8214	0.812802	1.62555	0.00585	0.0558947	no
XLOC_012410	XLOC_012410	mRpL37	3R:10782562-10784092	Wild Type	ZnF2 Mutant	OK	8.52247	19.4179	1.18804	1.58538	0.00585	0.0558947	no
XLOC_008608	XLOC_008608	CG10863	3L:3940518-3942465	Wild Type	ZnF2 Mutant	OK	41.3475	18.7819	-1.13845	-1.62963	0.0059	0.0561452	no
XLOC_002247	XLOC_002247	Ziz	2L:7472512-7496307	Wild Type	ZnF2 Mutant	OK	0.726007	2.1731	1.5817	1.74988	0.0059	0.0561452	no
XLOC_004604	XLOC_004604	CG9344	2R:20977055-20978818	Wild Type	ZnF2 Mutant	OK	11.3835	40.0537	1.81499	1.70206	0.0059	0.0561452	no
XLOC_009822	XLOC_009822	CG10584	3L:21030279-21031360	Wild Type	ZnF2 Mutant	OK	34.3087	15.4641	-1.14965	-1.66661	0.00595	0.056545	no
XLOC_002541	XLOC_002541	Ge-1	2L:11095149-11100888	Wild Type	ZnF2 Mutant	OK	27.1696	16.0557	-0.758902	-1.60788	0.006	0.0567914	no
XLOC_007269	XLOC_007269	h	3L:8675758-8679253	Wild Type	ZnF2 Mutant	OK	66.5795	106.161	0.673103	1.58129	0.006	0.0567914	no
XLOC_006027	XLOC_006027	CG42697,GEFmeso	2R:18554118-18612730	Wild Type	ZnF2 Mutant	OK	8.45913	15.2491	0.85014	1.54009	0.006	0.0567914	no
XLOC_005548	XLOC_005548	CG8841	2R:12321237-12326258	Wild Type	ZnF2 Mutant	OK	30.0432	7.88724	-1.92945	-2.11162	0.00605	0.057112	no
XLOC_005682	XLOC_005682	Prosap	2R:14060455-14140902	Wild Type	ZnF2 Mutant	OK	13.7151	7.66129	-0.840107	-1.59186	0.00605	0.057112	no
XLOC_012045	XLOC_012045	CG2182	3R:5655138-5660570	Wild Type	ZnF2 Mutant	OK	63.7902	116.667	0.870984	1.71879	0.0061	0.0575073	no
XLOC_000741	XLOC_000741	hoip	2L:9699790-9700459	Wild Type	ZnF2 Mutant	OK	16.7448	40.6973	1.28122	1.55232	0.00615	0.0579016	no
XLOC_007445	XLOC_007445	CG7616	3L:11169816-11172411	Wild Type	ZnF2 Mutant	OK	16.9432	7.53382	-1.16925	-1.6641	0.0062	0.0582175	no
XLOC_005671	XLOC_005671	tum	2R:13856149-13858689	Wild Type	ZnF2 Mutant	OK	124.12	77.7991	-0.673914	-1.62597	0.0062	0.0582175	no
XLOC_008675	XLOC_008675	CG13712	3L:4692782-4796253	Wild Type	ZnF2 Mutant	OK	183.704	28.9355	-2.66647	-1.9891	0.00625	0.0582237	no
XLOC_000018	XLOC_000018	Tbc1d15-17	2L:203778-210725	Wild Type	ZnF2 Mutant	OK	45.6504	20.3903	-1.16274	-1.87686	0.00625	0.0582237	no
XLOC_002466	XLOC_002466	RnrL	2L:10325025-10327943	Wild Type	ZnF2 Mutant	OK	25.5643	13.6176	-0.908654	-1.61262	0.00625	0.0582237	no
XLOC_002598	XLOC_002598	CG6734	2L:12014303-12020960	Wild Type	ZnF2 Mutant	OK	4.06105	8.02117	0.981962	1.60348	0.00625	0.0582237	no
XLOC_006711	XLOC_006711	RhoGEF3	3L:277436-305292	Wild Type	ZnF2 Mutant	OK	10.8627	21.644	0.994583	1.66283	0.00625	0.0582237	no
XLOC_005140	XLOC_005140	p47	2R:7465017-7466759	Wild Type	ZnF2 Mutant	OK	10.1741	22.1775	1.1242	1.61977	0.00625	0.0582237	no
XLOC_004076	XLOC_004076	CG11807,CG42391	2R:15201252-15204466	Wild Type	ZnF2 Mutant	OK	14.0206	4.96455	-1.49781	-1.68521	0.0063	0.0585354	no
XLOC_011457	XLOC_011457	Bili	3R:25131305-25136709	Wild Type	ZnF2 Mutant	OK	0.42303	1.46901	1.79602	1.46956	0.0063	0.0585354	no
XLOC_004281	XLOC_004281	cyp33	2R:17545221-17546400	Wild Type	ZnF2 Mutant	OK	32.9231	63.2964	0.943023	1.59941	0.0064	0.059154	no
XLOC_002160	XLOC_002160	retm	2L:6448463-6455929	Wild Type	ZnF2 Mutant	OK	3.92143	9.1284	1.21898	1.66457	0.0064	0.059154	no
XLOC_004705	XLOC_004705	CG6758	2R:22174921-22182879	Wild Type	ZnF2 Mutant	OK	6.71469	16.3202	1.28126	1.62312	0.0064	0.059154	no
XLOC_003071	XLOC_003071	CG10166	2L:19518823-19526368	Wild Type	ZnF2 Mutant	OK	3.78493	14.9736	1.98408	1.73512	0.0064	0.059154	no
XLOC_003167	XLOC_003167	CG9272	2L:20926318-20927860	Wild Type	ZnF2 Mutant	OK	19.5862	7.80303	-1.32773	-1.65622	0.0065	0.059844	no
XLOC_006590	XLOC_006590	HSPC300	2R:24027716-24028789	Wild Type	ZnF2 Mutant	OK	107.963	47.4998	-1.18455	-1.63496	0.0065	0.059844	no
XLOC_007297	XLOC_007297	CG5087	3L:8998183-9002566	Wild Type	ZnF2 Mutant	OK	11.5937	5.30931	-1.12675	-1.67933	0.0065	0.059844	no
XLOC_010783	XLOC_010783	nsl1	3R:15793781-15802102	Wild Type	ZnF2 Mutant	OK	22.1175	36.5234	0.723631	1.59634	0.00655	0.060226	no
XLOC_008757	XLOC_008757	CG10467,CG10469	3L:6082882-6094747	Wild Type	ZnF2 Mutant	OK	35.5648	17.2164	-1.04666	-1.63073	0.00665	0.0609082	no
XLOC_005139	XLOC_005139	CG11141	2R:7459684-7463395	Wild Type	ZnF2 Mutant	OK	55.6475	33.1004	-0.749467	-1.55087	0.00665	0.0609081	no
XLOC_003444	XLOC_003444	CG11125	2R:7446188-7451553	Wild Type	ZnF2 Mutant	OK	15.8481	32.0005	1.01378	1.61252	0.00665	0.0609081	no
XLOC_000102	XLOC_000102	Tgt	2L:1184064-1185698	Wild Type	ZnF2 Mutant	OK	2.16087	6.6181	1.6148	1.58743	0.0067	0.0612868	no
XLOC_012795	XLOC_012795	CG5903	3R:16116160-16146855	Wild Type	ZnF2 Mutant	OK	61.8619	32.8656	-0.912474	-1.57742	0.00675	0.0616645	no
XLOC_005097	XLOC_005097	coro	2R:6862000-6872718	Wild Type	ZnF2 Mutant	OK	239.219	164.541	-0.539885	-1.54082	0.0068	0.0619614	no
XLOC_012706	XLOC_012706	btsz	3R:14801772-14875488	Wild Type	ZnF2 Mutant	OK	167.598	240.451	0.520735	1.58667	0.0068	0.0619614	no
XLOC_002931	XLOC_002931	Aac11	2L:17474911-17477888	Wild Type	ZnF2 Mutant	OK	120.113	179.997	0.583576	1.55936	0.00685	0.0621769	no
XLOC_001918	XLOC_001918	toc	2L:3068344-3144786	Wild Type	ZnF2 Mutant	OK	87.78	139.829	0.671703	1.63204	0.00685	0.0621769	no
XLOC_004114	XLOC_004114	CG30089	2R:15727380-15762044	Wild Type	ZnF2 Mutant	OK	8.40752	17.5405	1.06094	1.66432	0.00685	0.0621769	no
XLOC_006585	XLOC_006585	CG3860,mir-1009	2R:23992137-23995055	Wild Type	ZnF2 Mutant	OK	11.4697	4.73493	-1.27642	-1.56475	0.0069	0.0624706	no
XLOC_013527	XLOC_013527	CG6420	3R:26719846-26725216	Wild Type	ZnF2 Mutant	OK	12.4873	5.64472	-1.14549	-1.63953	0.0069	0.0624706	no
XLOC_000470	XLOC_000470	CG9135	2L:6050799-6053877	Wild Type	ZnF2 Mutant	OK	45.4686	76.0791	0.74263	1.58233	0.00695	0.0627628	no
XLOC_005743	XLOC_005743	U3-55K	2R:14858844-14860758	Wild Type	ZnF2 Mutant	OK	11.2808	22.9893	1.02709	1.54811	0.00695	0.0627628	no
XLOC_010665	XLOC_010665	Dip-B	3R:13782287-13785676	Wild Type	ZnF2 Mutant	OK	11.4427	4.83198	-1.24374	-1.61521	0.007	0.0630534	no
XLOC_007946	XLOC_007946	AstC-R1	3L:18560257-18576326	Wild Type	ZnF2 Mutant	OK	0.072644	0.599796	3.04556	1.68279	0.007	0.0630534	no
XLOC_008980	XLOC_008980	CG4911	3L:9067194-9072731	Wild Type	ZnF2 Mutant	OK	202.681	133.97	-0.597306	-1.55964	0.0071	0.063711	no
XLOC_005018	XLOC_005018	gus	2R:5116989-5129296	Wild Type	ZnF2 Mutant	OK	428.297	287.069	-0.577214	-1.53394	0.0071	0.063711	no
XLOC_004359	XLOC_004359	CG10914	2R:18158256-18160310	Wild Type	ZnF2 Mutant	OK	6.04304	13.8685	1.19847	1.6485	0.0071	0.063711	no
XLOC_010916	XLOC_010916	sll	3R:17606105-17608541	Wild Type	ZnF2 Mutant	OK	9.6962	3.97439	-1.28669	-1.62007	0.00715	0.0639975	no
XLOC_006002	XLOC_006002	stau	2R:18117895-18125779	Wild Type	ZnF2 Mutant	OK	88.5929	58.2023	-0.606115	-1.53999	0.00715	0.0639975	no
XLOC_001513	XLOC_001513	Ns4	2L:20752475-20757985	Wild Type	ZnF2 Mutant	OK	56.6799	30.8106	-0.879409	-1.62498	0.0072	0.0642825	no
XLOC_011807	XLOC_011807	CG34317,CG7950	3R:30056858-30058131	Wild Type	ZnF2 Mutant	OK	2.99941	9.18921	1.61526	1.62224	0.0072	0.0642825	no
XLOC_001066	XLOC_001066	Sec71	2L:13793520-13799674	Wild Type	ZnF2 Mutant	OK	5.4615	10.4171	0.931584	1.56781	0.00725	0.064566	no
XLOC_011455	XLOC_011455	vig2	3R:25123372-25125619	Wild Type	ZnF2 Mutant	OK	16.4412	32.7161	0.992689	1.60976	0.00725	0.064566	no
XLOC_005552	XLOC_005552	CG8839	2R:12339609-12344617	Wild Type	ZnF2 Mutant	OK	17.7237	8.06628	-1.1357	-1.67718	0.0073	0.0647669	no
XLOC_010019	XLOC_010019	Gnf1	3R:4906621-4910081	Wild Type	ZnF2 Mutant	OK	2.9345	6.76032	1.20397	1.54636	0.0073	0.0647669	no
XLOC_005147	XLOC_005147	az2	2R:7510621-7512749	Wild Type	ZnF2 Mutant	OK	3.19439	8.50349	1.41251	1.63144	0.0073	0.0647669	no
XLOC_008438	XLOC_008438	cue	3L:1502842-1523380	Wild Type	ZnF2 Mutant	OK	97.8107	37.9628	-1.3654	-1.71213	0.00735	0.0649663	no
XLOC_001013	XLOC_001013	Pect	2L:13203761-13211814	Wild Type	ZnF2 Mutant	OK	57.2849	32.5104	-0.817252	-1.60776	0.00735	0.0649663	no
XLOC_009770	XLOC_009770	CG5282	3L:20424423-20426071	Wild Type	ZnF2 Mutant	OK	1.08133	4.20954	1.96086	1.62512	0.00735	0.0649663	no
XLOC_003314	XLOC_003314	CR46064	2R:4780310-4785362	Wild Type	ZnF2 Mutant	OK	4.1489	1.15746	-1.84176	-1.74702	0.0074	0.0652453	no
XLOC_002860	XLOC_002860	heix	2L:16294182-16299858	Wild Type	ZnF2 Mutant	OK	66.8229	41.9336	-0.672238	-1.54416	0.0074	0.0652453	no
XLOC_010517	XLOC_010517	CG31368	3R:11882789-11893297	Wild Type	ZnF2 Mutant	OK	15.4775	26.4361	0.772342	1.53336	0.00745	0.065523	no
XLOC_009796	XLOC_009796	CG11396	3L:20786339-20788137	Wild Type	ZnF2 Mutant	OK	1.68804	7.08826	2.07008	1.81424	0.00745	0.065523	no
XLOC_003334	XLOC_003334	vlc	2R:5702111-5705439	Wild Type	ZnF2 Mutant	OK	138.594	88.7805	-0.642549	-1.56204	0.0076	0.0665941	no
XLOC_010820	XLOC_010820	tara	3R:16225650-16260329	Wild Type	ZnF2 Mutant	OK	2.39021	5.96739	1.31996	1.64033	0.0076	0.0665941	no
XLOC_013703	XLOC_013703	CG7609	3R:29741971-29745092	Wild Type	ZnF2 Mutant	OK	1.7459	5.14879	1.56027	1.73693	0.0076	0.0665941	no
XLOC_008571	XLOC_008571	CG17746	3L:3236804-3239578	Wild Type	ZnF2 Mutant	OK	154.309	97.9821	-0.655234	-1.52934	0.00765	0.0667842	no
XLOC_009477	XLOC_009477	fax	3L:16402795-16411828	Wild Type	ZnF2 Mutant	OK	463.92	638.99	0.461919	1.53111	0.00765	0.0667842	no
XLOC_012603	XLOC_012603	CG33977	3R:13402558-13403051	Wild Type	ZnF2 Mutant	OK	1.04687	7.08661	2.75901	1.67357	0.00765	0.0667842	no
XLOC_013035	XLOC_013035	CG4433	3R:20018268-20021338	Wild Type	ZnF2 Mutant	OK	9.93433	2.88575	-1.78347	-1.73998	0.0077	0.066973	no
XLOC_005289	XLOC_005289	CG13742	2R:9078720-9087808	Wild Type	ZnF2 Mutant	OK	26.9081	13.9897	-0.943671	-1.59977	0.0077	0.066973	no
XLOC_002450	XLOC_002450	bsk	2L:10247501-10250501	Wild Type	ZnF2 Mutant	OK	6.31289	15.7517	1.31913	1.65213	0.0077	0.066973	no
XLOC_001972	XLOC_001972	CG31955	2L:3711880-3713105	Wild Type	ZnF2 Mutant	OK	0	1.41022	inf	-nan	0.00775	0.0673252	no
XLOC_006627	XLOC_006627	Letm1	2R:24509507-24515320	Wild Type	ZnF2 Mutant	OK	37.8106	60.2249	0.671568	1.53785	0.0078	0.0675936	no
XLOC_002422	XLOC_002422	CG5885	2L:9917220-9918176	Wild Type	ZnF2 Mutant	OK	9.08133	22.3235	1.29759	1.60923	0.0078	0.0675936	no
XLOC_009991	XLOC_009991	tub	3R:4387741-4389813	Wild Type	ZnF2 Mutant	OK	32.4117	17.1798	-0.915802	-1.55261	0.00785	0.0677781	no
XLOC_000231	XLOC_000231	CG17265	2L:2999285-3016069	Wild Type	ZnF2 Mutant	OK	8.85975	16.6499	0.910178	1.50716	0.00785	0.067778	no
XLOC_012223	XLOC_012223	RpA-70	3R:8262119-8264451	Wild Type	ZnF2 Mutant	OK	9.83236	19.2061	0.965956	1.50349	0.00785	0.0677781	no
XLOC_011952	XLOC_011952	CG31522	3R:4441414-4462883	Wild Type	ZnF2 Mutant	OK	4.89267	11.7811	1.26778	1.68007	0.0079	0.0681267	no
XLOC_004057	XLOC_004057	Cyp6a22	2R:14871365-14873705	Wild Type	ZnF2 Mutant	OK	38.6489	20.3037	-0.928681	-1.58794	0.00805	0.0692515	no
XLOC_011413	XLOC_011413	asp	3R:24753848-24760513	Wild Type	ZnF2 Mutant	OK	27.1614	41.9987	0.628784	1.52311	0.00805	0.0692515	no
XLOC_013422	XLOC_013422	CG10425	3R:25260962-25262636	Wild Type	ZnF2 Mutant	OK	45.4925	25.1309	-0.856168	-1.49463	0.0081	0.0695971	no
XLOC_000897	XLOC_000897	Ppt2	2L:11280056-11281920	Wild Type	ZnF2 Mutant	OK	22.1417	42.1465	0.928646	1.51833	0.00815	0.0699418	no
XLOC_009589	XLOC_009589	Prestin	3L:17898888-17907812	Wild Type	ZnF2 Mutant	OK	3.72545	1.29834	-1.52075	-1.52465	0.0082	0.0701159	no
XLOC_005597	XLOC_005597	CG13322	2R:12934233-12936535	Wild Type	ZnF2 Mutant	OK	9.38396	19.1414	1.02843	1.60321	0.0082	0.0701159	no
XLOC_008470	XLOC_008470	CG13933	3L:1771808-1775147	Wild Type	ZnF2 Mutant	OK	3.65498	8.38464	1.19789	1.58588	0.0082	0.0701159	no
XLOC_003554	XLOC_003554	gcl	2R:8724257-8729501	Wild Type	ZnF2 Mutant	OK	41.4426	23.1944	-0.837335	-1.54834	0.00825	0.0702888	no
XLOC_008592	XLOC_008592	CG32264,ntc	3L:3714825-3806459	Wild Type	ZnF2 Mutant	OK	83.4518	48.3836	-0.786426	-1.53341	0.00825	0.0702888	no
XLOC_008833	XLOC_008833	msl-3	3L:7094817-7125533	Wild Type	ZnF2 Mutant	OK	48.3343	28.086	-0.783197	-1.5182	0.00825	0.0702888	no
XLOC_004616	XLOC_004616	Treh	2R:21074017-21091004	Wild Type	ZnF2 Mutant	OK	7.99343	3.0902	-1.37111	-1.6849	0.0083	0.0704604	no
XLOC_003528	XLOC_003528	Cyp4e2	2R:8444559-8447164	Wild Type	ZnF2 Mutant	OK	27.7298	13.7624	-1.01071	-1.5904	0.0083	0.0704604	no
XLOC_010062	XLOC_010062	CG12171	3R:5633626-5635624	Wild Type	ZnF2 Mutant	OK	98.4043	56.9961	-0.787859	-1.52902	0.0083	0.0704604	no
XLOC_004596	XLOC_004596	Ipk1	2R:20870790-20879145	Wild Type	ZnF2 Mutant	OK	7.57996	15.8659	1.06567	1.54573	0.00835	0.0707153	no
XLOC_001361	XLOC_001361	Grip71	2L:18708845-18713748	Wild Type	ZnF2 Mutant	OK	4.58852	10.4054	1.18123	1.561	0.00835	0.0707153	no
XLOC_004085	XLOC_004085	Arf51F	2R:15322500-15325490	Wild Type	ZnF2 Mutant	OK	175.503	109.446	-0.681285	-1.54278	0.0084	0.070969	no
XLOC_001990	XLOC_001990	CG3702	2L:4224649-4227097	Wild Type	ZnF2 Mutant	OK	14.5602	27.5214	0.918518	1.54265	0.0084	0.070969	no
XLOC_009398	XLOC_009398	CG7656	3L:15585430-15588175	Wild Type	ZnF2 Mutant	OK	33.6572	60.5186	0.846461	1.54738	0.00845	0.0712214	no
XLOC_004003	XLOC_004003	conv	2R:14270728-14275495	Wild Type	ZnF2 Mutant	OK	1.06698	3.3213	1.63821	1.63622	0.00845	0.0712214	no
XLOC_010569	XLOC_010569	CG17202	3R:12422767-12423606	Wild Type	ZnF2 Mutant	OK	2.26713	8.37699	1.88557	1.56208	0.0085	0.0714727	no
XLOC_010183	XLOC_010183	sas	3R:7159228-7183702	Wild Type	ZnF2 Mutant	OK	0.212713	2.18576	3.36115	2.79232	0.0085	0.0714727	no
XLOC_002339	XLOC_002339	U26	2L:8445860-8449576	Wild Type	ZnF2 Mutant	OK	9.85361	4.7584	-1.05018	-1.55496	0.00855	0.0716379	no
XLOC_002667	XLOC_002667	CG15479	2L:13233797-13234660	Wild Type	ZnF2 Mutant	OK	61.8562	31.9251	-0.954226	-1.54076	0.00855	0.0716379	no
XLOC_000388	XLOC_000388	His3.3A	2L:5055057-5058248	Wild Type	ZnF2 Mutant	OK	787.782	1142.62	0.536478	1.53122	0.00855	0.0716379	no
XLOC_011152	XLOC_011152	CR43975	3R:21216819-21217242	Wild Type	ZnF2 Mutant	OK	0.889052	6.36933	2.8408	1.59225	0.0086	0.0719716	no
XLOC_011226	XLOC_011226	PyK	3R:22367535-22372746	Wild Type	ZnF2 Mutant	OK	10	4.16218	-1.26459	-1.55448	0.00865	0.0722193	no
XLOC_007919	XLOC_007919	CG7441	3L:17849726-17852453	Wild Type	ZnF2 Mutant	OK	1.29072	5.34783	2.05078	1.89722	0.00865	0.0722193	no
XLOC_007587	XLOC_007587	CG11267	3L:13016049-13016903	Wild Type	ZnF2 Mutant	OK	68.8738	32.4237	-1.08691	-1.56311	0.0087	0.0723807	no
XLOC_012192	XLOC_012192	CG2943	3R:7903029-7911779	Wild Type	ZnF2 Mutant	OK	139.541	86.893	-0.683372	-1.52509	0.0087	0.0723807	no
XLOC_005206	XLOC_005206	Asap	2R:8114285-8123001	Wild Type	ZnF2 Mutant	OK	30.6375	49.3915	0.688963	1.54325	0.0087	0.0723807	no
XLOC_001679	XLOC_001679	CR43242	2L:23069004-23070724	Wild Type	ZnF2 Mutant	OK	5.65124	1.52803	-1.8869	-1.55879	0.00875	0.072626	no
XLOC_000769	XLOC_000769	bib	2L:9983670-9995538	Wild Type	ZnF2 Mutant	OK	117.176	173.193	0.563702	1.51615	0.00875	0.072626	no
XLOC_013816	XLOC_013816	CG15547,Sap-r	3R:30881791-30889062	Wild Type	ZnF2 Mutant	OK	449.063	327.494	-0.45545	-1.46429	0.0088	0.0728702	no
XLOC_001728	XLOC_001728	Nle	2L:564162-568121	Wild Type	ZnF2 Mutant	OK	6.20284	17.8347	1.52369	1.78033	0.0088	0.0728702	no
XLOC_003932	XLOC_003932	CG4676	2R:13235979-13237055	Wild Type	ZnF2 Mutant	OK	1.66522	6.7388	2.01678	1.70702	0.00885	0.0731986	no
XLOC_004826	XLOC_004826	retn	2R:23632609-23654820	Wild Type	ZnF2 Mutant	OK	596.612	432.086	-0.465472	-1.51511	0.0089	0.0733551	no
XLOC_009428	XLOC_009428	mib1	3L:16005192-16011812	Wild Type	ZnF2 Mutant	OK	16.5869	32.9959	0.992243	1.69966	0.0089	0.0733551	no
XLOC_005486	XLOC_005486	Egm	2R:11616868-11619023	Wild Type	ZnF2 Mutant	OK	10.338	20.9013	1.01564	1.55783	0.0089	0.0733551	no
XLOC_012002	XLOC_012002	CG11999	3R:5353716-5354747	Wild Type	ZnF2 Mutant	OK	77.1422	42.2638	-0.868096	-1.53163	0.00895	0.0735958	no
XLOC_007494	XLOC_007494	mtTFB1	3L:11708978-11711386	Wild Type	ZnF2 Mutant	OK	165.708	106.649	-0.635773	-1.49734	0.00895	0.0735958	no
XLOC_013330	XLOC_013330	p38a	3R:24150415-24152321	Wild Type	ZnF2 Mutant	OK	2.93614	0.50352	-2.5438	-1.62938	0.009	0.0739211	no
XLOC_007956	XLOC_007956	MYPT-75D	3L:18625958-18667177	Wild Type	ZnF2 Mutant	OK	57.8246	36.5905	-0.660216	-1.50951	0.00915	0.075066	no
XLOC_010659	XLOC_010659	CG34383	3R:13715206-13764667	Wild Type	ZnF2 Mutant	OK	7.43567	13.3846	0.848035	1.5531	0.0092	0.0753889	no
XLOC_000887	XLOC_000887	CG4705	2L:11091443-11095096	Wild Type	ZnF2 Mutant	OK	2.22851	5.21877	1.22763	1.54548	0.00925	0.075711	no
XLOC_001239	XLOC_001239	grp,squ	2L:16680053-16700825	Wild Type	ZnF2 Mutant	OK	185.615	113.4	-0.710888	-1.51655	0.0093	0.0759446	no
XLOC_005272	XLOC_005272	Pgi	2R:8910899-8914069	Wild Type	ZnF2 Mutant	OK	9.48368	18.7361	0.982302	1.49409	0.0093	0.0759446	no
XLOC_007096	XLOC_007096	tan	3L:6055135-6057002	Wild Type	ZnF2 Mutant	OK	90.0739	53.7187	-0.745685	-1.53686	0.00935	0.0761772	no
XLOC_013569	XLOC_013569	CG5987	3R:27248233-27251007	Wild Type	ZnF2 Mutant	OK	2.05635	6.23224	1.59966	1.64296	0.00935	0.0761772	no
XLOC_004856	XLOC_004856	Lpt	2R:23898560-23903661	Wild Type	ZnF2 Mutant	OK	10.9661	18.973	0.790892	1.48886	0.0094	0.0764966	no
XLOC_000208	XLOC_000208	Bacc	2L:2745097-2758176	Wild Type	ZnF2 Mutant	OK	1005.05	1470.95	0.549486	1.51699	0.0095	0.0768686	no
XLOC_010526	XLOC_010526	Spt3	3R:12017155-12018550	Wild Type	ZnF2 Mutant	OK	31.1694	55.3164	0.827579	1.52709	0.0095	0.0768686	no
XLOC_003986	XLOC_003986	mam	2R:13991202-14060356	Wild Type	ZnF2 Mutant	OK	2.8131	5.81799	1.04836	1.52339	0.0095	0.0768686	no
XLOC_002641	XLOC_002641	CG5776	2L:12700948-12704451	Wild Type	ZnF2 Mutant	OK	0.801216	2.92794	1.86962	1.66231	0.0095	0.0768686	no
XLOC_001656	XLOC_001656	CR33987,tio	2L:22019207-22025734	Wild Type	ZnF2 Mutant	OK	0.182864	1.13004	2.62753	1.38985	0.0095	0.0768686	no
XLOC_005942	XLOC_005942	EDTP	2R:17431031-17444938	Wild Type	ZnF2 Mutant	OK	69.4627	41.3899	-0.746962	-1.5804	0.00955	0.0770091	no
XLOC_012557	XLOC_012557	mus308	3R:12705093-12712299	Wild Type	ZnF2 Mutant	OK	4.04519	9.3475	1.20837	1.7407	0.00955	0.0770091	no
XLOC_006593	XLOC_006593	Not11	2R:24036719-24037915	Wild Type	ZnF2 Mutant	OK	5.93053	17.6292	1.57174	1.66636	0.00955	0.0770091	no
XLOC_000670	XLOC_000670	Sema-1a	2L:8542146-8672041	Wild Type	ZnF2 Mutant	OK	3.77429	1.3604	-1.47217	-1.71987	0.0096	0.0771487	no
XLOC_005954	XLOC_005954	Dcr-2	2R:17573461-17581525	Wild Type	ZnF2 Mutant	OK	15.0608	6.02932	-1.32073	-1.71816	0.0096	0.0771487	no
XLOC_012480	XLOC_012480	CG17360	3R:11781130-11787014	Wild Type	ZnF2 Mutant	OK	3.65926	7.30334	0.997003	1.52778	0.0096	0.0771487	no
XLOC_008084	XLOC_008084	zye	3L:20413603-20424309	Wild Type	ZnF2 Mutant	OK	0.298759	1.19776	2.00329	1.71459	0.0097	0.0778639	no
XLOC_011239	XLOC_011239	AP-2mu	3R:22462454-22464603	Wild Type	ZnF2 Mutant	OK	8.43174	17.4403	1.04852	1.54586	0.00985	0.0789785	no
XLOC_010841	XLOC_010841	CG14883	3R:16456051-16458233	Wild Type	ZnF2 Mutant	OK	13.5913	6.1178	-1.1516	-1.53656	0.00995	0.0796	no
XLOC_013566	XLOC_013566	CG31064,CG42814	3R:27228672-27239085	Wild Type	ZnF2 Mutant	OK	8.77057	18.4633	1.07392	1.5506	0.00995	0.0796	no
XLOC_002988	XLOC_002988	Pde11	2L:18532024-18590342	Wild Type	ZnF2 Mutant	OK	7.51407	3.69771	-1.02296	-1.56379	0.01005	0.0801284	no
XLOC_005539	XLOC_005539	Sr-CII	2R:12208892-12212155	Wild Type	ZnF2 Mutant	OK	92.1107	141.167	0.615961	1.48855	0.01005	0.0801284	no
XLOC_012940	XLOC_012940	WRNexo	3R:18361993-18366162	Wild Type	ZnF2 Mutant	OK	0.799911	4.58362	2.51858	1.7268	0.01005	0.0801284	no
XLOC_009346	XLOC_009346	mop	3L:14769340-14776129	Wild Type	ZnF2 Mutant	OK	46.661	30.3241	-0.621751	-1.51568	0.0101	0.0804364	no
XLOC_005937	XLOC_005937	CG6568	2R:17405303-17407427	Wild Type	ZnF2 Mutant	OK	2.03201	7.34091	1.85305	1.71567	0.01015	0.0807438	no
XLOC_012484	XLOC_012484	CG6950	3R:11820380-11822493	Wild Type	ZnF2 Mutant	OK	9.85502	3.53011	-1.48115	-1.61753	0.0102	0.0810505	no
XLOC_007036	XLOC_007036	CG13711	3L:4692782-4796253	Wild Type	ZnF2 Mutant	OK	115.999	20.619	-2.49207	-1.8074	0.0104	0.0824546	no
XLOC_000458	XLOC_000458	Gpdh	2L:5943642-5948968	Wild Type	ZnF2 Mutant	OK	73.9891	43.1798	-0.776956	-1.51301	0.0104	0.0824546	no
XLOC_009682	XLOC_009682	CG18294,CR32207	3L:19474730-19478720	Wild Type	ZnF2 Mutant	OK	87.1762	51.5791	-0.757149	-1.46646	0.01045	0.0825737	no
XLOC_004677	XLOC_004677	HmgD	2R:21697487-21716727	Wild Type	ZnF2 Mutant	OK	2008.63	2716.6	0.43559	1.46532	0.01045	0.0825737	no
XLOC_005144	XLOC_005144	CG1620	2R:7493805-7496466	Wild Type	ZnF2 Mutant	OK	10.4101	20.4224	0.972177	1.52718	0.01045	0.0825737	no
XLOC_009885	XLOC_009885	CG7148	3L:21830543-21832253	Wild Type	ZnF2 Mutant	OK	9.10074	19.8778	1.1271	1.53662	0.0105	0.0828763	no
XLOC_011390	XLOC_011390	Pp1alpha-96A	3R:24518269-24522331	Wild Type	ZnF2 Mutant	OK	149.676	99.8306	-0.584286	-1.46928	0.01065	0.0838732	no
XLOC_000982	XLOC_000982	nub	2L:12587624-12646356	Wild Type	ZnF2 Mutant	OK	21.1928	36.1921	0.772099	1.50261	0.01065	0.0838732	no
XLOC_004452	XLOC_004452	CG7137	2R:19227343-19228613	Wild Type	ZnF2 Mutant	OK	42.305	73.4845	0.79661	1.52037	0.0107	0.0841733	no
XLOC_005403	XLOC_005403	trsn	2R:10479010-10480111	Wild Type	ZnF2 Mutant	OK	20.916	42.6986	1.02958	1.49982	0.0108	0.0848657	no
XLOC_010626	XLOC_010626	CG11686	3R:13260355-13262227	Wild Type	ZnF2 Mutant	OK	22.1189	6.40762	-1.78742	-1.547	0.0109	0.0854618	no
XLOC_000516	XLOC_000516	CG11070	2L:6658516-6662033	Wild Type	ZnF2 Mutant	OK	0.949438	2.80325	1.56196	1.57396	0.0109	0.0854618	no
XLOC_007964	XLOC_007964	CG6885	3L:18744487-18745699	Wild Type	ZnF2 Mutant	OK	303.974	439.141	0.530738	1.45903	0.01105	0.086542	no
XLOC_012479	XLOC_012479	l(3)neo38	3R:11765037-11779128	Wild Type	ZnF2 Mutant	OK	55.3935	89.0311	0.684595	1.48446	0.0111	0.0868376	no
XLOC_001997	XLOC_001997	Art2	2L:4277695-4281324	Wild Type	ZnF2 Mutant	OK	18.2235	8.37851	-1.12104	-1.51037	0.01115	0.0871325	no
XLOC_006934	XLOC_006934	PHGPx	3L:3319554-3328871	Wild Type	ZnF2 Mutant	OK	122.072	38.4504	-1.66667	-1.61546	0.0112	0.0874267	no
XLOC_009434	XLOC_009434	CG5235	3L:16087626-16090392	Wild Type	ZnF2 Mutant	OK	57.4275	35.6268	-0.688778	-1.45128	0.01125	0.0874314	no
XLOC_006835	XLOC_006835	Tmhs	3L:1885656-1891462	Wild Type	ZnF2 Mutant	OK	7.35297	15.9851	1.12033	1.48027	0.01125	0.0874314	no
XLOC_005159	XLOC_005159	CG1358	2R:7595264-7620711	Wild Type	ZnF2 Mutant	OK	1.61631	4.37842	1.43771	1.58032	0.01125	0.0874314	no
XLOC_012975	XLOC_012975	CG14291	3R:18911052-18912922	Wild Type	ZnF2 Mutant	OK	0.200661	1.3032	2.69923	1.59355	0.01125	0.0874314	no
XLOC_011884	XLOC_011884	Gprk2	3R:31395659-31457873	Wild Type	ZnF2 Mutant	OK	46.7622	25.4279	-0.878929	-1.47189	0.0114	0.0885	no
XLOC_001759	XLOC_001759	Tfb4	2L:1147821-1150677	Wild Type	ZnF2 Mutant	OK	74.7118	16.7882	-2.15389	-2.01037	0.01145	0.0886937	no
XLOC_005504	XLOC_005504	ERp60	2R:11886066-11890979	Wild Type	ZnF2 Mutant	OK	930.543	686.132	-0.439585	-1.4435	0.01145	0.0886937	no
XLOC_012832	XLOC_012832	CG14906	3R:16649980-16651157	Wild Type	ZnF2 Mutant	OK	4.62849	11.5837	1.32348	1.49088	0.0115	0.0889836	no
XLOC_010837	XLOC_010837	CG17565	3R:16432997-16434740	Wild Type	ZnF2 Mutant	OK	28.4782	14.4967	-0.974134	-1.49407	0.0116	0.0896594	no
XLOC_004637	XLOC_004637	CG9485	2R:21312398-21323320	Wild Type	ZnF2 Mutant	OK	13.3619	6.22387	-1.10224	-1.50783	0.0117	0.0902353	no
XLOC_000787	XLOC_000787	CG4908	2L:10222656-10224447	Wild Type	ZnF2 Mutant	OK	7.87216	17.3532	1.14037	1.50367	0.0117	0.0902353	no
XLOC_006009	XLOC_006009	CG5726	2R:18173668-18180197	Wild Type	ZnF2 Mutant	OK	22.6074	12.3438	-0.873007	-1.50066	0.0119	0.0915783	no
XLOC_011506	XLOC_011506	RASSF8	3R:25661711-25665640	Wild Type	ZnF2 Mutant	OK	73.0792	47.1938	-0.630864	-1.48321	0.0119	0.0915783	no
XLOC_010630	XLOC_010630	CG8773	3R:13294747-13298288	Wild Type	ZnF2 Mutant	OK	1.34346	0.238822	-2.49195	-1.68196	0.01195	0.0917636	no
XLOC_013864	XLOC_013864	awd	3R:31743489-31746077	Wild Type	ZnF2 Mutant	OK	3206.93	2326.12	-0.463263	-1.4634	0.01195	0.0917636	no
XLOC_007433	XLOC_007433	SuUR	3L:11064990-11069025	Wild Type	ZnF2 Mutant	OK	74.7804	49.4	-0.59815	-1.45791	0.012	0.0918486	no
XLOC_008076	XLOC_008076	CG5618,eRF1	3L:20348354-20356632	Wild Type	ZnF2 Mutant	OK	331.938	231.288	-0.521221	-1.45367	0.012	0.0918486	no
XLOC_009538	XLOC_009538	Cad74A	3L:17367752-17379530	Wild Type	ZnF2 Mutant	OK	4.71505	8.83955	0.906701	1.47431	0.012	0.0918486	no
XLOC_000330	XLOC_000330	tutl	2L:4283147-4323781	Wild Type	ZnF2 Mutant	OK	15.9936	26.9699	0.753856	1.49932	0.01205	0.0921317	no
XLOC_008936	XLOC_008936	CG33057,mkg-p	3L:8395999-8405277	Wild Type	ZnF2 Mutant	OK	6.54012	13.6759	1.06425	1.49376	0.0121	0.0924142	no
XLOC_008169	XLOC_008169	Aef1	3L:21433421-21441363	Wild Type	ZnF2 Mutant	OK	51.5053	14.6149	-1.81728	-2.31581	0.01215	0.0926961	no
XLOC_007727	XLOC_007727	Eip71CD,Z600,gdl	3L:15509060-15513202	Wild Type	ZnF2 Mutant	OK	1196.68	1742.35	0.542002	1.45282	0.0122	0.0929774	no
XLOC_010788	XLOC_010788	spn-E	3R:15837418-15844415	Wild Type	ZnF2 Mutant	OK	19.2415	11.0614	-0.798682	-1.46756	0.01225	0.0932581	no
XLOC_001743	XLOC_001743	CG4291	2L:851250-852730	Wild Type	ZnF2 Mutant	OK	8.12613	18.7263	1.20442	1.52273	0.0123	0.0935381	no
XLOC_006994	XLOC_006994	CG14997	3L:4240068-4242603	Wild Type	ZnF2 Mutant	OK	31.5821	53.7976	0.768434	1.44302	0.0124	0.0940965	no
XLOC_013259	XLOC_013259	CG4434,pnt	3R:23288216-23346167	Wild Type	ZnF2 Mutant	OK	1.69908	5.0489	1.57121	1.74729	0.0124	0.0940965	no
XLOC_004669	XLOC_004669	CG42363,CG42364	2R:21664125-21666579	Wild Type	ZnF2 Mutant	OK	10.9468	4.46661	-1.29326	-1.53092	0.01245	0.0941489	no
XLOC_009776	XLOC_009776	CG5199	3L:20442418-20452864	Wild Type	ZnF2 Mutant	OK	11.648	22.9578	0.978905	1.46872	0.01245	0.0941489	no
XLOC_006297	XLOC_006297	dgt3	2R:20992275-20994381	Wild Type	ZnF2 Mutant	OK	5.18479	12.125	1.22563	1.51244	0.01245	0.0941489	no
XLOC_006545	XLOC_006545	CG4091	2R:23698104-23702406	Wild Type	ZnF2 Mutant	OK	38.2182	20.5632	-0.894198	-1.49971	0.0125	0.0941489	no
XLOC_006821	XLOC_006821	CG13921	3L:1746906-1755934	Wild Type	ZnF2 Mutant	OK	23.525	13.7048	-0.779516	-1.48859	0.0125	0.0941489	no
XLOC_005750	XLOC_005750	aPKC	2R:14942397-14962969	Wild Type	ZnF2 Mutant	OK	130.588	87.8448	-0.571995	-1.45814	0.0125	0.0941489	no
XLOC_007167	XLOC_007167	Rint1	3L:7323618-7326255	Wild Type	ZnF2 Mutant	OK	0.312881	2.24234	2.84132	1.82308	0.0125	0.0941489	no
XLOC_007622	XLOC_007622	Nplp2	3L:13356375-13357223	Wild Type	ZnF2 Mutant	OK	20.2914	7.09559	-1.51587	-1.36354	0.01255	0.0944251	no
XLOC_005453	XLOC_005453	CG9062	2R:11279724-11283971	Wild Type	ZnF2 Mutant	OK	88.6346	57.9224	-0.613748	-1.46522	0.0126	0.0946002	no
XLOC_010571	XLOC_010571	CG5245	3R:12429559-12431235	Wild Type	ZnF2 Mutant	OK	1.43648	5.20126	1.85632	1.61418	0.0126	0.0946002	no
XLOC_003186	XLOC_003186	bur	2L:21174181-21179729	Wild Type	ZnF2 Mutant	OK	238.183	168.289	-0.501128	-1.43244	0.0127	0.09525	no
XLOC_002221	XLOC_002221	Rab30	2L:7030492-7032606	Wild Type	ZnF2 Mutant	OK	38.7414	20.4573	-0.921263	-1.44397	0.01275	0.0953221	no
XLOC_012769	XLOC_012769	c(3)G	3R:15788520-15792579	Wild Type	ZnF2 Mutant	OK	24.0261	13.1939	-0.86473	-1.47448	0.01275	0.0953221	no
XLOC_000454	XLOC_000454	bchs	2L:5907168-5922776	Wild Type	ZnF2 Mutant	OK	1.13702	2.45731	1.11182	1.50051	0.01275	0.0953221	no
XLOC_006910	XLOC_006910	CG42494,Girdin	3L:3178929-3186549	Wild Type	ZnF2 Mutant	OK	24.8204	15.253	-0.702428	-1.38217	0.0128	0.0953937	no
XLOC_003129	XLOC_003129	CG10949	2L:20415172-20416918	Wild Type	ZnF2 Mutant	OK	9.00653	19.0681	1.08211	1.47496	0.0128	0.0953937	no
XLOC_000812	XLOC_000812	dpr19	2L:10376167-10379905	Wild Type	ZnF2 Mutant	OK	1.90247	5.28469	1.47395	1.55077	0.0128	0.0953937	no
XLOC_008004	XLOC_008004	Chd3	3L:19447172-19450238	Wild Type	ZnF2 Mutant	OK	4.2779	9.09773	1.0886	1.49373	0.01285	0.0956656	no
XLOC_000838	XLOC_000838	Trim9	2L:10544882-10628054	Wild Type	ZnF2 Mutant	OK	1.11	3.79767	1.77456	1.58119	0.0129	0.095937	no
XLOC_007873	XLOC_007873	Fit2	3L:17024327-17027117	Wild Type	ZnF2 Mutant	OK	4.54171	9.71324	1.09672	1.48136	0.013	0.096478	no
XLOC_002034	XLOC_002034	Cf2	2L:4876890-4883107	Wild Type	ZnF2 Mutant	OK	0.936886	2.90603	1.63311	1.53332	0.013	0.096478	no
XLOC_002659	XLOC_002659	CG16974	2L:13179246-13191979	Wild Type	ZnF2 Mutant	OK	75.4516	50.3091	-0.584732	-1.43302	0.01305	0.0967476	no
XLOC_002647	XLOC_002647	kek1	2L:12816999-12822787	Wild Type	ZnF2 Mutant	OK	0.633064	0.101697	-2.63807	-1.62803	0.0131	0.0968142	no
XLOC_009497	XLOC_009497	Abl	3L:16615865-16647882	Wild Type	ZnF2 Mutant	OK	100.559	70.4061	-0.51427	-1.44212	0.0131	0.0968142	no
XLOC_002505	XLOC_002505	CG6729	2L:10740781-10743935	Wild Type	ZnF2 Mutant	OK	4.2539	9.10948	1.09858	1.4901	0.0131	0.0968142	no
XLOC_013573	XLOC_013573	l(3)mbt	3R:27265456-27273273	Wild Type	ZnF2 Mutant	OK	47.2147	31.295	-0.593303	-1.44993	0.01315	0.0968803	no
XLOC_009311	XLOC_009311	ptip	3L:14020314-14029121	Wild Type	ZnF2 Mutant	OK	12.2634	19.212	0.647648	1.42322	0.01315	0.0968803	no
XLOC_011599	XLOC_011599	T48	3R:26881733-26912886	Wild Type	ZnF2 Mutant	OK	2.845	7.17822	1.3352	1.46534	0.01315	0.0968803	no
XLOC_013208	XLOC_013208	wfs1	3R:22687541-22690380	Wild Type	ZnF2 Mutant	OK	4.6417	9.69995	1.06332	1.43798	0.01325	0.0975156	no
XLOC_013458	XLOC_013458	Tnks	3R:25653090-25661286	Wild Type	ZnF2 Mutant	OK	47.4076	31.734	-0.579091	-1.41317	0.0133	0.0977819	no
XLOC_009186	XLOC_009186	Pop2	3L:11998397-12002915	Wild Type	ZnF2 Mutant	OK	126.054	82.1128	-0.618369	-1.43016	0.01335	0.0980477	no
XLOC_007438	XLOC_007438	CG7638	3L:11109689-11112117	Wild Type	ZnF2 Mutant	OK	78.2922	49.2355	-0.669171	-1.43639	0.01345	0.0985776	no
XLOC_004005	XLOC_004005	Shroom	2R:14308141-14351802	Wild Type	ZnF2 Mutant	OK	2.38279	6.61616	1.47334	1.51638	0.01345	0.0985776	no
XLOC_007224	XLOC_007224	Atg18a	3L:8186856-8191118	Wild Type	ZnF2 Mutant	OK	223.36	320.935	0.522911	1.45369	0.0135	0.0987397	no
XLOC_010802	XLOC_010802	pnr	3R:16026078-16041796	Wild Type	ZnF2 Mutant	OK	0.645309	2.71734	2.07414	1.57871	0.0135	0.0987397	no
XLOC_004358	XLOC_004358	adp	2R:18151703-18154060	Wild Type	ZnF2 Mutant	OK	15.0584	7.27464	-1.04962	-1.49737	0.01355	0.098901	no
XLOC_006044	XLOC_006044	Jabba	2R:18754994-18761082	Wild Type	ZnF2 Mutant	OK	23.7218	11.6635	-1.02421	-1.43565	0.01355	0.098901	no
XLOC_013340	XLOC_013340	CG5706	3R:24250459-24252679	Wild Type	ZnF2 Mutant	OK	3.3694	8.58173	1.34878	1.521	0.0136	0.0991637	no
XLOC_007913	XLOC_007913	CG7460	3L:17690014-17750588	Wild Type	ZnF2 Mutant	OK	2.16293	0.374251	-2.53091	-1.58448	0.01365	0.0993237	no
XLOC_009992	XLOC_009992	CG14646	3R:4390365-4394259	Wild Type	ZnF2 Mutant	OK	35.2899	20.109	-0.811418	-1.39151	0.01365	0.0993237	no
XLOC_007147	XLOC_007147	CG9953	3L:6969657-6972467	Wild Type	ZnF2 Mutant	OK	218.159	307.61	0.495724	1.3904	0.0137	0.0995852	no
XLOC_001442	XLOC_001442	CG10463	2L:19758878-19760986	Wild Type	ZnF2 Mutant	OK	6.46367	13.0384	1.01234	1.39578	0.01375	0.0998462	no
XLOC_000810	XLOC_000810	lft	2L:10364470-10366410	Wild Type	ZnF2 Mutant	OK	12.7847	28.1965	1.1411	1.5585	0.0138	0.100004	no
XLOC_010704	XLOC_010704	CG14851	3R:14562339-14562845	Wild Type	ZnF2 Mutant	OK	0.587699	0	-inf	-nan	0.0138	0.100004	no
XLOC_012445	XLOC_012445	CG17187	3R:11230616-11231879	Wild Type	ZnF2 Mutant	OK	6.76758	15.1171	1.15947	1.42226	0.01385	0.100264	no
XLOC_012397	XLOC_012397	CG31467	3R:10705169-10706863	Wild Type	ZnF2 Mutant	OK	1.05591	3.53061	1.74143	1.4383	0.0139	0.100523	no
XLOC_008148	XLOC_008148	Ilk	3L:21216900-21219240	Wild Type	ZnF2 Mutant	OK	39.794	21.4855	-0.88919	-1.41462	0.01395	0.100679	no
XLOC_013079	XLOC_013079	Fancd2	3R:20810803-20816190	Wild Type	ZnF2 Mutant	OK	2.07589	4.74305	1.19209	1.47751	0.01395	0.100679	no
XLOC_006746	XLOC_006746	CG32479	3L:871898-895313	Wild Type	ZnF2 Mutant	OK	191.36	139.498	-0.456045	-1.39181	0.014	0.100834	no
XLOC_009771	XLOC_009771	CG5274	3L:20426198-20427666	Wild Type	ZnF2 Mutant	OK	12.7968	24.6437	0.945433	1.44367	0.014	0.100834	no
XLOC_010653	XLOC_010653	B52	3R:13661310-13666891	Wild Type	ZnF2 Mutant	OK	885.915	1187.06	0.42215	1.38683	0.01405	0.101091	no
XLOC_009863	XLOC_009863	S1P	3L:21613796-21617376	Wild Type	ZnF2 Mutant	OK	1.71236	4.22842	1.30413	1.4097	0.0141	0.101143	no
XLOC_001941	XLOC_001941	Cog3	2L:3452465-3457064	Wild Type	ZnF2 Mutant	OK	3.63913	9.58003	1.39644	1.55888	0.0141	0.101143	no
XLOC_013147	XLOC_013147	GABA-B-R2	3R:21770332-21775840	Wild Type	ZnF2 Mutant	OK	0.426684	1.51972	1.83256	1.50138	0.0141	0.101143	no
XLOC_004386	XLOC_004386	GstE1	2R:18396637-18399223	Wild Type	ZnF2 Mutant	OK	117.863	186.733	0.663863	1.41133	0.01415	0.101399	no
XLOC_009008	XLOC_009008	CG32037	3L:9489501-9492215	Wild Type	ZnF2 Mutant	OK	4.97193	1.25725	-1.98353	-1.69077	0.0142	0.101552	no
XLOC_008134	XLOC_008134	CG10585	3L:21027914-21030141	Wild Type	ZnF2 Mutant	OK	10.7427	21.4972	1.00079	1.51479	0.0142	0.101552	no
XLOC_008859	XLOC_008859	Rac2	3L:7423826-7454717	Wild Type	ZnF2 Mutant	OK	31.474	18.7387	-0.748135	-1.39169	0.01425	0.101806	no
XLOC_005679	XLOC_005679	Ctf4	2R:13980361-13983317	Wild Type	ZnF2 Mutant	OK	3.91213	8.23184	1.07326	1.42896	0.0144	0.102774	no
XLOC_010974	XLOC_010974	eIF-1A	3R:18274664-18283528	Wild Type	ZnF2 Mutant	OK	242.626	162.053	-0.582267	-1.42102	0.01445	0.103027	no
XLOC_005638	XLOC_005638	CG42321	2R:13414977-13439051	Wild Type	ZnF2 Mutant	OK	6.46461	2.9994	-1.10789	-1.50102	0.01455	0.103636	no
XLOC_006908	XLOC_006908	CG32280	3L:3162179-3169080	Wild Type	ZnF2 Mutant	OK	10.2813	27.1351	1.40014	1.57143	0.0146	0.103887	no
XLOC_005912	XLOC_005912	tef	2R:17054001-17059299	Wild Type	ZnF2 Mutant	OK	39.7515	23.116	-0.782119	-1.41388	0.01465	0.104139	no
XLOC_006693	XLOC_006693	Pdk1	3L:129449-145895	Wild Type	ZnF2 Mutant	OK	124.044	83.0133	-0.579441	-1.41391	0.01475	0.104639	no
XLOC_000142	XLOC_000142	Der-1	2L:1973956-1975413	Wild Type	ZnF2 Mutant	OK	3.03529	11.2447	1.88934	1.62482	0.01475	0.104639	no
XLOC_012512	XLOC_012512	CG4848	3R:12213791-12219686	Wild Type	ZnF2 Mutant	OK	2.77433	6.38509	1.20257	1.5037	0.01485	0.105243	no
XLOC_007323	XLOC_007323	Hsp23	3L:9381881-9382765	Wild Type	ZnF2 Mutant	OK	216.88	140.173	-0.629693	-1.40266	0.0149	0.105387	no
XLOC_011311	XLOC_011311	CG16710	3R:23682502-23683980	Wild Type	ZnF2 Mutant	OK	1.68231	5.50652	1.7107	1.39083	0.0149	0.105387	no
XLOC_010291	XLOC_010291	CG11760,CG8116	3R:8712905-8721320	Wild Type	ZnF2 Mutant	OK	297.653	206.8	-0.525397	-1.40784	0.01495	0.105604	no
XLOC_009533	XLOC_009533	CG6479	3L:17337171-17339262	Wild Type	ZnF2 Mutant	OK	91.0034	58.1424	-0.646331	-1.38534	0.015	0.105604	no
XLOC_003893	XLOC_003893	ZnT49B	2R:12652804-12655743	Wild Type	ZnF2 Mutant	OK	65.8038	42.6234	-0.626525	-1.38461	0.015	0.105604	no
XLOC_002788	XLOC_002788	ck	2L:15044962-15057862	Wild Type	ZnF2 Mutant	OK	58.9296	40.6554	-0.535546	-1.39958	0.015	0.105604	no
XLOC_011734	XLOC_011734	Vha100-1	3R:29131192-29138573	Wild Type	ZnF2 Mutant	OK	120.037	81.2265	-0.563451	-1.42011	0.01505	0.105604	no
XLOC_002796	XLOC_002796	Pol32	2L:15254818-15256304	Wild Type	ZnF2 Mutant	OK	3.77352	9.65872	1.35592	1.498	0.01505	0.105604	no
XLOC_003709	XLOC_003709	Elp2	2R:10645734-10648634	Wild Type	ZnF2 Mutant	OK	0.876552	2.86172	1.70697	1.48075	0.01505	0.105604	no
XLOC_013123	XLOC_013123	CG16791	3R:21318299-21349601	Wild Type	ZnF2 Mutant	OK	0.556727	2.15593	1.95327	1.68362	0.01505	0.105604	no
XLOC_007653	XLOC_007653	Hsc70Cb	3L:14037018-14043686	Wild Type	ZnF2 Mutant	OK	56.3145	35.6344	-0.660235	-1.4422	0.0151	0.10585	no
XLOC_011297	XLOC_011297	Sec13	3R:23356277-23358531	Wild Type	ZnF2 Mutant	OK	188.403	273.252	0.536415	1.38981	0.01525	0.106795	no
XLOC_010632	XLOC_010632	CG32473	3R:13302647-13312785	Wild Type	ZnF2 Mutant	OK	86.7164	58.3943	-0.570478	-1.37501	0.0154	0.107633	no
XLOC_000662	XLOC_000662	CG13088	2L:8488980-8490546	Wild Type	ZnF2 Mutant	OK	0.565817	3.00895	2.41085	1.62019	0.0154	0.107633	no
XLOC_002232	XLOC_002232	CG13784	2L:7204537-7220033	Wild Type	ZnF2 Mutant	OK	25.5419	42.9509	0.74982	1.38551	0.01555	0.108574	no
XLOC_003576	XLOC_003576	babo	2R:8952338-8962796	Wild Type	ZnF2 Mutant	OK	4.27161	8.1647	0.934621	1.47034	0.0156	0.108816	no
XLOC_005178	XLOC_005178	CG30383	2R:7823942-7825141	Wild Type	ZnF2 Mutant	OK	3.01394	8.0388	1.41533	1.33377	0.01575	0.109646	no
XLOC_010184	XLOC_010184	CG14609,lap	3R:7186993-7203450	Wild Type	ZnF2 Mutant	OK	0.796064	2.34941	1.56134	1.43928	0.01575	0.109646	no
XLOC_013719	XLOC_013719	CG15514	3R:29860054-29861494	Wild Type	ZnF2 Mutant	OK	80.4251	49.0758	-0.712633	-1.4084	0.01585	0.110234	no
XLOC_012763	XLOC_012763	AOX3	3R:15542747-15547736	Wild Type	ZnF2 Mutant	OK	13.6754	7.8218	-0.80601	-1.4045	0.01595	0.11082	no
XLOC_003368	XLOC_003368	bin3	2R:6214567-6240602	Wild Type	ZnF2 Mutant	OK	23.215	35.6982	0.620797	1.37615	0.0161	0.111753	no
XLOC_006939	XLOC_006939	CG12010	3L:3374281-3376649	Wild Type	ZnF2 Mutant	OK	2.09463	5.89316	1.49234	1.49388	0.01625	0.112684	no
XLOC_008198	XLOC_008198	CG11248	3L:21680049-21684951	Wild Type	ZnF2 Mutant	OK	23.0441	13.0421	-0.821227	-1.41617	0.01635	0.112935	no
XLOC_002790	XLOC_002790	vig	2L:15061655-15074383	Wild Type	ZnF2 Mutant	OK	24.5693	44.743	0.864804	1.46689	0.01635	0.112935	no
XLOC_005566	XLOC_005566	CG8818	2R:12515374-12518912	Wild Type	ZnF2 Mutant	OK	13.9312	31.7123	1.18672	1.45391	0.01635	0.112935	no
XLOC_010619	XLOC_010619	sim	3R:13057754-13078124	Wild Type	ZnF2 Mutant	OK	0.214103	0.991199	2.21087	1.33227	0.01635	0.112935	no
XLOC_008044	XLOC_008044	Grasp65	3L:19924942-19927175	Wild Type	ZnF2 Mutant	OK	36.8302	21.5356	-0.774165	-1.36743	0.0166	0.11455	no
XLOC_011440	XLOC_011440	Hr96	3R:25025234-25029351	Wild Type	ZnF2 Mutant	OK	1.30952	3.47131	1.40645	1.41828	0.01665	0.114783	no
XLOC_007031	XLOC_007031	CG13713	3L:4692782-4796253	Wild Type	ZnF2 Mutant	OK	249.972	87.229	-1.51889	-1.43844	0.01675	0.115136	no
XLOC_011228	XLOC_011228	CG18596	3R:22375922-22379955	Wild Type	ZnF2 Mutant	OK	2.16182	4.83471	1.16118	1.39601	0.01675	0.115136	no
XLOC_002368	XLOC_002368	CG31886	2L:8953480-8959051	Wild Type	ZnF2 Mutant	OK	3.21969	7.97448	1.30847	1.5577	0.01675	0.115136	no
XLOC_002484	XLOC_002484	RluA-1	2L:10463339-10474349	Wild Type	ZnF2 Mutant	OK	0.305682	1.25773	2.04072	1.36106	0.0169	0.116054	no
XLOC_000738	XLOC_000738	GlcAT-S	2L:9616468-9623109	Wild Type	ZnF2 Mutant	OK	5.68877	1.92103	-1.56623	-1.4548	0.01695	0.116172	no
XLOC_013410	XLOC_013410	CG9996	3R:25072728-25074607	Wild Type	ZnF2 Mutant	OK	15.4286	28.0381	0.861777	1.36881	0.01695	0.116172	no
XLOC_012417	XLOC_012417	SelR	3R:10863354-10868642	Wild Type	ZnF2 Mutant	OK	149.354	94.5188	-0.660065	-1.38829	0.0171	0.116974	no
XLOC_010340	XLOC_010340	CG42511	3R:9404384-9408169	Wild Type	ZnF2 Mutant	OK	4.28925	8.83885	1.04313	1.39023	0.0171	0.116974	no
XLOC_013735	XLOC_013735	CG7920	3R:30010475-30015284	Wild Type	ZnF2 Mutant	OK	30.5327	50.698	0.731573	1.38954	0.01715	0.117203	no
XLOC_009438	XLOC_009438	Pgm	3L:16122001-16128531	Wild Type	ZnF2 Mutant	OK	44.6962	26.4315	-0.757896	-1.39201	0.0172	0.117205	no
XLOC_001060	XLOC_001060	CR44846,TM9SF4	2L:13745447-13773905	Wild Type	ZnF2 Mutant	OK	8.81863	15.8791	0.848503	1.31655	0.0172	0.117205	no
XLOC_000835	XLOC_000835	Lrr47	2L:10517334-10519269	Wild Type	ZnF2 Mutant	OK	3.78093	9.2607	1.29238	1.48224	0.0172	0.117205	no
XLOC_006803	XLOC_006803	Cct1,Cct2	3L:1546091-1555315	Wild Type	ZnF2 Mutant	OK	71.4981	46.7101	-0.614172	-1.38038	0.01725	0.117433	no
XLOC_013798	XLOC_013798	CG2246	3R:30592970-30601489	Wild Type	ZnF2 Mutant	OK	13.2345	25.7592	0.960782	1.40733	0.01745	0.118566	no
XLOC_005996	XLOC_005996	Muc55B	2R:18050018-18052107	Wild Type	ZnF2 Mutant	OK	2.59205	0	-inf	-nan	0.01745	0.118566	no
XLOC_009154	XLOC_009154	CG11652	3L:11693878-11696963	Wild Type	ZnF2 Mutant	OK	100.64	149.744	0.573291	1.37621	0.0175	0.118678	no
XLOC_013101	XLOC_013101	Mvl	3R:21051382-21060800	Wild Type	ZnF2 Mutant	OK	4.90043	9.97235	1.02502	1.40965	0.0175	0.118678	no
XLOC_013714	XLOC_013714	Atg16	3R:29827280-29835101	Wild Type	ZnF2 Mutant	OK	52.2618	33.0115	-0.662786	-1.36742	0.01755	0.118903	no
XLOC_005721	XLOC_005721	CG12863	2R:14619797-14621320	Wild Type	ZnF2 Mutant	OK	27.055	14.3078	-0.919093	-1.39344	0.0176	0.119128	no
XLOC_009149	XLOC_009149	RIOK1	3L:11646233-11648474	Wild Type	ZnF2 Mutant	OK	60.5671	38.0632	-0.670138	-1.37129	0.0177	0.119691	no
XLOC_005848	XLOC_005848	fidipidine	2R:16262283-16264619	Wild Type	ZnF2 Mutant	OK	45.5763	27.9368	-0.706119	-1.37276	0.0178	0.120252	no
XLOC_000362	XLOC_000362	CG3294	2L:4794548-4796581	Wild Type	ZnF2 Mutant	OK	4.15424	9.63484	1.21368	1.41455	0.0179	0.120804	no
XLOC_003923	XLOC_003923	Spt-I	2R:13168497-13170745	Wild Type	ZnF2 Mutant	OK	79.3303	50.9188	-0.639674	-1.34561	0.01795	0.120804	no
XLOC_010975	XLOC_010975	CG8064	3R:18283659-18288777	Wild Type	ZnF2 Mutant	OK	19.2011	31.1859	0.699705	1.35403	0.01795	0.120804	no
XLOC_008948	XLOC_008948	CG5989	3L:8602410-8604149	Wild Type	ZnF2 Mutant	OK	8.38287	17.8461	1.09009	1.4454	0.01795	0.120804	no
XLOC_008324	XLOC_008324	CG40160	3L:26215814-26229433	Wild Type	ZnF2 Mutant	OK	63.1385	38.0452	-0.730804	-1.38177	0.018	0.121026	no
XLOC_008383	XLOC_008383	ebd1	3L:682884-685549	Wild Type	ZnF2 Mutant	OK	1.23515	3.20762	1.37682	1.30996	0.0181	0.121583	no
XLOC_004007	XLOC_004007	Arc2	2R:14361923-14362825	Wild Type	ZnF2 Mutant	OK	34.2017	16.6314	-1.04016	-1.41757	0.0184	0.123247	no
XLOC_008036	XLOC_008036	kto	3L:19836613-19844944	Wild Type	ZnF2 Mutant	OK	7.15695	16.456	1.2012	1.25879	0.0184	0.123247	no
XLOC_010560	XLOC_010560	GstD5	3R:12375732-12376572	Wild Type	ZnF2 Mutant	OK	1.78027	5.79419	1.70251	1.30009	0.0184	0.123247	no
XLOC_013302	XLOC_013302	Nup98-96	3R:23774224-23781621	Wild Type	ZnF2 Mutant	OK	82.1565	58.4612	-0.490894	-1.35986	0.0185	0.12345	no
XLOC_006003	XLOC_006003	Hsf	2R:18130302-18134634	Wild Type	ZnF2 Mutant	OK	45.5563	68.954	0.597983	1.35008	0.0185	0.12345	no
XLOC_004400	XLOC_004400	slim	2R:18440964-18445526	Wild Type	ZnF2 Mutant	OK	19.2339	31.5037	0.711868	1.36868	0.0185	0.12345	no
XLOC_003475	XLOC_003475	phr	2R:7825288-7828678	Wild Type	ZnF2 Mutant	OK	4.39272	10.6509	1.27779	1.45684	0.0185	0.12345	no
XLOC_005006	XLOC_005006	Gprk1	2R:4322294-4471060	Wild Type	ZnF2 Mutant	OK	63.2683	40.7747	-0.633809	-1.35167	0.01865	0.124333	no
XLOC_004409	XLOC_004409	CG5323,CG5327	2R:18615059-18619328	Wild Type	ZnF2 Mutant	OK	103.193	61.8935	-0.737481	-1.33902	0.0187	0.124549	no
XLOC_001403	XLOC_001403	pigeon	2L:19186042-19189938	Wild Type	ZnF2 Mutant	OK	1.97962	4.55444	1.20205	1.41816	0.01875	0.124765	no
XLOC_007376	XLOC_007376	Dronc	3L:9968478-9971002	Wild Type	ZnF2 Mutant	OK	129.005	87.3574	-0.562424	-1.36298	0.0188	0.12498	no
XLOC_000668	XLOC_000668	CG17834	2L:8529140-8541439	Wild Type	ZnF2 Mutant	OK	5.1389	1.45318	-1.82225	-1.7089	0.01885	0.125195	no
XLOC_001501	XLOC_001501	Uhg3,snoRNA:Me28S-C2645a,snoRNA:Me28S-C2645c	2L:20647532-20648848	Wild Type	ZnF2 Mutant	OK	28.3636	57.3648	1.01612	1.34925	0.0189	0.12541	no
XLOC_006051	XLOC_006051	CG15099	2R:18835262-18846619	Wild Type	ZnF2 Mutant	OK	2.18914	6.55238	1.58166	1.60974	0.01895	0.125506	no
XLOC_008709	XLOC_008709	blanks	3L:5497522-5498958	Wild Type	ZnF2 Mutant	OK	1.61489	5.38025	1.73624	1.4548	0.01895	0.125506	no
XLOC_013440	XLOC_013440	CG10669	3R:25331362-25335243	Wild Type	ZnF2 Mutant	OK	1.6104	4.45175	1.46696	1.45394	0.01905	0.12605	no
XLOC_000339	XLOC_000339	Traf4	2L:4361924-4380716	Wild Type	ZnF2 Mutant	OK	58.1626	36.1978	-0.684187	-1.35775	0.01915	0.126476	no
XLOC_010330	XLOC_010330	Vps16A	3R:9267018-9270224	Wild Type	ZnF2 Mutant	OK	5.23758	10.601	1.01723	1.38684	0.01915	0.126476	no
XLOC_006010	XLOC_006010	CG5721	2R:18180495-18184090	Wild Type	ZnF2 Mutant	OK	1.73995	6.9671	2.00151	1.59058	0.01925	0.127018	no
XLOC_012057	XLOC_012057	CG2023	3R:5822025-5824532	Wild Type	ZnF2 Mutant	OK	29.2907	14.0378	-1.06113	-1.38036	0.01935	0.12706	no
XLOC_007652	XLOC_007652	CG6650,CG6661	3L:14029578-14036836	Wild Type	ZnF2 Mutant	OK	64.1364	39.7564	-0.689956	-1.33774	0.01935	0.12706	no
XLOC_003974	XLOC_003974	CG13339	2R:13824857-13825572	Wild Type	ZnF2 Mutant	OK	6.57091	17.5354	1.4161	1.44331	0.01935	0.12706	no
XLOC_004128	XLOC_004128	CG8399	2R:16017736-16024627	Wild Type	ZnF2 Mutant	OK	1.58498	0.275002	-2.52695	-1.59864	0.0194	0.12706	no
XLOC_002185	XLOC_002185	Nse1	2L:6676648-6677625	Wild Type	ZnF2 Mutant	OK	27.9743	13.615	-1.03891	-1.3392	0.0194	0.12706	no
XLOC_005905	XLOC_005905	Ehbp1	2R:17007673-17015894	Wild Type	ZnF2 Mutant	OK	42.2547	62.664	0.568526	1.35963	0.0194	0.12706	no
XLOC_011142	XLOC_011142	rtet	3R:21108445-21110834	Wild Type	ZnF2 Mutant	OK	57.5937	88.5791	0.621055	1.35256	0.0194	0.12706	no
XLOC_004893	XLOC_004893	Zfrp8	2R:24133988-24138050	Wild Type	ZnF2 Mutant	OK	3.28184	15.3667	2.22723	1.65404	0.0194	0.12706	no
XLOC_009490	XLOC_009490	spd-2	3L:16591206-16595014	Wild Type	ZnF2 Mutant	OK	9.66079	16.462	0.768925	1.3446	0.01945	0.12727	no
XLOC_005716	XLOC_005716	tra2	2R:14601277-14604337	Wild Type	ZnF2 Mutant	OK	35.4196	16.1141	-1.13623	-1.47941	0.0195	0.127336	no
XLOC_004967	XLOC_004967	NKAIN	2R:24876690-24888615	Wild Type	ZnF2 Mutant	OK	11.2367	21.8266	0.957868	1.42969	0.0195	0.127336	no
XLOC_008360	XLOC_008360	CG32344	3L:321232-324720	Wild Type	ZnF2 Mutant	OK	69.3474	46.5356	-0.575507	-1.32195	0.01955	0.127336	no
XLOC_009583	XLOC_009583	MED19	3L:17843724-17846501	Wild Type	ZnF2 Mutant	OK	25.9076	42.7119	0.72126	1.35093	0.01955	0.127336	no
XLOC_000940	XLOC_000940	dgt2,escl	2L:11989935-11992848	Wild Type	ZnF2 Mutant	OK	6.2027	15.1325	1.28668	1.44045	0.01955	0.127336	no
XLOC_002440	XLOC_002440	Ripalpha	2L:10199400-10200974	Wild Type	ZnF2 Mutant	OK	100.317	62.8731	-0.67405	-1.33772	0.0196	0.127427	no
XLOC_008721	XLOC_008721	CG10590	3L:5601095-5603979	Wild Type	ZnF2 Mutant	OK	63.9812	41.7432	-0.616105	-1.35878	0.0196	0.127427	no
XLOC_004351	XLOC_004351	Spn55B	2R:18126346-18128210	Wild Type	ZnF2 Mutant	OK	7.0479	15.2962	1.11791	1.3979	0.01965	0.127518	no
XLOC_006595	XLOC_006595	gammaSnap1	2R:24047144-24057599	Wild Type	ZnF2 Mutant	OK	4.19947	12.5032	1.57402	1.37801	0.01965	0.127518	no
XLOC_000538	XLOC_000538	CG3430	2L:6957007-6960328	Wild Type	ZnF2 Mutant	OK	9.78171	24.9306	1.34976	1.45472	0.0197	0.127608	no
XLOC_004870	XLOC_004870	Sox14	2R:23978800-23988455	Wild Type	ZnF2 Mutant	OK	3.01436	11.2951	1.90578	1.7832	0.0197	0.127608	no
XLOC_010501	XLOC_010501	CG42327	3R:11656148-11673974	Wild Type	ZnF2 Mutant	OK	3.50452	1.70506	-1.0394	-1.30759	0.0198	0.128022	no
XLOC_002516	XLOC_002516	porin	2L:10847226-10856644	Wild Type	ZnF2 Mutant	OK	1233.6	926.963	-0.412292	-1.32514	0.0198	0.128022	no
XLOC_010664	XLOC_010664	CG9286	3R:13780963-13782082	Wild Type	ZnF2 Mutant	OK	13.5514	26.0548	0.943108	1.30566	0.01985	0.128111	no
XLOC_010152	XLOC_010152	Dfd	3R:6791835-6802428	Wild Type	ZnF2 Mutant	OK	1.60263	4.24665	1.40588	1.40251	0.01985	0.128111	no
XLOC_000204	XLOC_000204	CG31689	2L:2725673-2739830	Wild Type	ZnF2 Mutant	OK	2.4623	0.683558	-1.84887	-1.53033	0.01995	0.128405	no
XLOC_012054	XLOC_012054	CG2051	3R:5781761-5789384	Wild Type	ZnF2 Mutant	OK	65.5362	38.6935	-0.760201	-1.37171	0.01995	0.128405	no
XLOC_005071	XLOC_005071	Trap1	2R:6633646-6636262	Wild Type	ZnF2 Mutant	OK	7.40484	13.9911	0.917973	1.34734	0.01995	0.128405	no
XLOC_012264	XLOC_012264	ranshi	3R:8726853-8729693	Wild Type	ZnF2 Mutant	OK	16.208	7.66075	-1.08115	-1.31945	0.0201	0.129136	no
XLOC_013191	XLOC_013191	Rpn7	3R:22448098-22462054	Wild Type	ZnF2 Mutant	OK	20.7613	38.9702	0.908472	1.38278	0.0201	0.129136	no
XLOC_013565	XLOC_013565	CG42813	3R:27227069-27228561	Wild Type	ZnF2 Mutant	OK	45.1983	24.6748	-0.873234	-1.39605	0.02025	0.129864	no
XLOC_000440	XLOC_000440	CG11030	2L:5724655-5762420	Wild Type	ZnF2 Mutant	OK	78.8604	51.5755	-0.612616	-1.31665	0.02025	0.129864	no
XLOC_003726	XLOC_003726	Pex6	2R:10879973-10883202	Wild Type	ZnF2 Mutant	OK	6.62228	12.6825	0.937438	1.35832	0.0203	0.130067	no
XLOC_000072	XLOC_000072	Clp	2L:819963-821209	Wild Type	ZnF2 Mutant	OK	20.2424	36.0078	0.830928	1.31766	0.02035	0.130152	no
XLOC_009546	XLOC_009546	CG32174,frc	3L:17428935-17433621	Wild Type	ZnF2 Mutant	OK	17.0013	31.2758	0.879401	1.36768	0.02035	0.130152	no
XLOC_008855	XLOC_008855	SMSr	3L:7374049-7381474	Wild Type	ZnF2 Mutant	OK	3.15235	6.70212	1.08819	1.33419	0.0204	0.130354	no
XLOC_004026	XLOC_004026	ttv	2R:14526266-14587917	Wild Type	ZnF2 Mutant	OK	46.1121	29.2105	-0.65866	-1.34251	0.02045	0.130438	no
XLOC_008508	XLOC_008508	CG1275	3L:2252743-2257423	Wild Type	ZnF2 Mutant	OK	133.836	89.931	-0.573572	-1.32636	0.02045	0.130438	no
XLOC_010710	XLOC_010710	Cad88C	3R:14626675-14642563	Wild Type	ZnF2 Mutant	OK	0.978311	2.3588	1.26969	1.36875	0.02065	0.131595	no
XLOC_006744	XLOC_006744	CG13890	3L:851345-852673	Wild Type	ZnF2 Mutant	OK	12.9044	5.46576	-1.23937	-1.40596	0.02075	0.131995	no
XLOC_005569	XLOC_005569	Sin3A	2R:12572067-12592917	Wild Type	ZnF2 Mutant	OK	65.5743	92.1223	0.490419	1.34485	0.02075	0.131995	no
XLOC_009229	XLOC_009229	sowah	3L:12537512-12572542	Wild Type	ZnF2 Mutant	OK	26.2035	15.5546	-0.75242	-1.31556	0.0208	0.132075	no
XLOC_004073	XLOC_004073	CG7544	2R:15147859-15149709	Wild Type	ZnF2 Mutant	OK	2.89416	7.57706	1.3885	1.39906	0.0208	0.132075	no
XLOC_004804	XLOC_004804	CG30409,Rpi	2R:23354366-23357565	Wild Type	ZnF2 Mutant	OK	32.9316	13.5102	-1.28542	-1.53106	0.02085	0.132156	no
XLOC_002127	XLOC_002127	lid	2L:5989399-5999501	Wild Type	ZnF2 Mutant	OK	208.877	156.118	-0.420016	-1.33005	0.02085	0.132156	no
XLOC_007000	XLOC_007000	CG1311	3L:4277961-4282817	Wild Type	ZnF2 Mutant	OK	66.5492	33.6479	-0.983905	-1.38759	0.0209	0.132236	no
XLOC_004696	XLOC_004696	Synj	2R:22080175-22085767	Wild Type	ZnF2 Mutant	OK	0.649674	1.79144	1.46334	1.36612	0.0209	0.132236	no
XLOC_003931	XLOC_003931	fsd	2R:13230582-13231663	Wild Type	ZnF2 Mutant	OK	1.89526	6.13731	1.69521	1.44191	0.021	0.13275	no
XLOC_008531	XLOC_008531	Mrtf	3L:2717614-2766536	Wild Type	ZnF2 Mutant	OK	12.2973	7.21084	-0.770103	-1.33682	0.02105	0.132947	no
XLOC_007651	XLOC_007651	upSET	3L:14002126-14020148	Wild Type	ZnF2 Mutant	OK	44.434	31.8452	-0.480588	-1.32689	0.0211	0.133144	no
XLOC_011909	XLOC_011909	sip3	3R:31772218-31776652	Wild Type	ZnF2 Mutant	OK	51.4648	33.3119	-0.627549	-1.33311	0.02115	0.133341	no
XLOC_006882	XLOC_006882	mRpS35	3L:2780898-2782105	Wild Type	ZnF2 Mutant	OK	6.6222	15.3958	1.21715	1.39131	0.02125	0.133733	no
XLOC_009678	XLOC_009678	CG33062	3L:19441718-19446444	Wild Type	ZnF2 Mutant	OK	2.3814	7.22068	1.60032	1.33003	0.02125	0.133733	no
XLOC_009780	XLOC_009780	CG5059	3L:20514597-20519393	Wild Type	ZnF2 Mutant	OK	238.77	337.271	0.498286	1.32292	0.02145	0.134708	no
XLOC_006985	XLOC_006985	Ack	3L:4108185-4114157	Wild Type	ZnF2 Mutant	OK	47.6311	68.7712	0.5299	1.32441	0.02145	0.134708	no
XLOC_007623	XLOC_007623	CG14111,SNCF	3L:13377956-13381346	Wild Type	ZnF2 Mutant	OK	1040.85	747.441	-0.477725	-1.32004	0.0215	0.134708	no
XLOC_009925	XLOC_009925	l(3)04053	3L:22738601-22741388	Wild Type	ZnF2 Mutant	OK	4.4595	8.83596	0.986504	1.28539	0.0215	0.134708	no
XLOC_013248	XLOC_013248	hh	3R:23128168-23141906	Wild Type	ZnF2 Mutant	OK	0.575184	3.29152	2.51666	1.60181	0.0215	0.134708	no
XLOC_010520	XLOC_010520	CG31211	3R:11949679-11954038	Wild Type	ZnF2 Mutant	OK	21.4144	33.9617	0.665325	1.30853	0.02165	0.135481	no
XLOC_013327	XLOC_013327	CG5463	3R:24113285-24130255	Wild Type	ZnF2 Mutant	OK	9.45188	4.09117	-1.20809	-1.38465	0.0217	0.135481	no
XLOC_008701	XLOC_008701	lama	3L:5343618-5355923	Wild Type	ZnF2 Mutant	OK	9.60888	4.82141	-0.994912	-1.38955	0.0217	0.135481	no
XLOC_013540	XLOC_013540	CG6330	3R:26949691-26958491	Wild Type	ZnF2 Mutant	OK	44.2655	26.8527	-0.721118	-1.29293	0.0217	0.135481	no
XLOC_008923	XLOC_008923	cert	3L:8282527-8289870	Wild Type	ZnF2 Mutant	OK	18.6394	10.4564	-0.833966	-1.34934	0.0218	0.135747	no
XLOC_012318	XLOC_012318	CG9393	3R:9561582-9563673	Wild Type	ZnF2 Mutant	OK	113.767	74.7229	-0.606463	-1.32733	0.0218	0.135747	no
XLOC_006338	XLOC_006338	EfSec	2R:21384551-21386221	Wild Type	ZnF2 Mutant	OK	0.351523	1.76248	2.32592	1.53314	0.0218	0.135747	no
XLOC_011253	XLOC_011253	Efa6	3R:22587754-22613656	Wild Type	ZnF2 Mutant	OK	8.59598	16.8909	0.974509	1.39273	0.02185	0.135938	no
XLOC_004732	XLOC_004732	CG4610	2R:22492196-22494295	Wild Type	ZnF2 Mutant	OK	1.91997	5.1559	1.42514	1.40965	0.0219	0.13613	no
XLOC_007493	XLOC_007493	CR43887	3L:11693134-11693661	Wild Type	ZnF2 Mutant	OK	807.525	1134.86	0.490929	1.32262	0.02195	0.136321	no
XLOC_007294	XLOC_007294	Srp68	3L:8975045-8979880	Wild Type	ZnF2 Mutant	OK	25.9081	14.9707	-0.791263	-1.33776	0.022	0.136512	no
XLOC_003639	XLOC_003639	dap	2R:9712320-9716256	Wild Type	ZnF2 Mutant	OK	4.51083	1.94847	-1.21105	-1.32959	0.02205	0.136702	no
XLOC_002692	XLOC_002692	B4	2L:13500623-13549328	Wild Type	ZnF2 Mutant	OK	35.3126	23.9819	-0.558239	-1.29886	0.02215	0.137202	no
XLOC_010068	XLOC_010068	Atg17	3R:5669712-5679930	Wild Type	ZnF2 Mutant	OK	73.7661	102.047	0.468201	1.30432	0.0223	0.13801	no
XLOC_010938	XLOC_010938	CG31360	3R:17685096-17687071	Wild Type	ZnF2 Mutant	OK	26.1946	10.0099	-1.38785	-1.42279	0.0224	0.138387	no
XLOC_008180	XLOC_008180	VhaM9.7-b	3L:21539861-21541215	Wild Type	ZnF2 Mutant	OK	98.1359	57.5159	-0.77082	-1.34293	0.0224	0.138387	no
XLOC_002529	XLOC_002529	CG33129	2L:10964904-10970275	Wild Type	ZnF2 Mutant	OK	30.9984	16.3395	-0.923829	-1.33529	0.0225	0.138884	no
XLOC_006055	XLOC_006055	Jheh2	2R:18855766-18858245	Wild Type	ZnF2 Mutant	OK	3.2895	0.920332	-1.83764	-1.48478	0.02255	0.13895	no
XLOC_012553	XLOC_012553	kar	3R:12682185-12689367	Wild Type	ZnF2 Mutant	OK	1.33912	4.05721	1.5992	1.48635	0.02255	0.13895	no
XLOC_012059	XLOC_012059	disp	3R:5849696-5856311	Wild Type	ZnF2 Mutant	OK	23.7505	15.1137	-0.652101	-1.33477	0.02265	0.139203	no
XLOC_001353	XLOC_001353	CG10333	2L:18606831-18609550	Wild Type	ZnF2 Mutant	OK	31.4262	48.052	0.612629	1.28835	0.02265	0.139203	no
XLOC_012946	XLOC_012946	CG12333	3R:18400372-18402716	Wild Type	ZnF2 Mutant	OK	4.90393	10.3009	1.07075	1.34004	0.02265	0.139203	no
XLOC_012749	XLOC_012749	ldlCp	3R:15357228-15361657	Wild Type	ZnF2 Mutant	OK	2.49932	6.35558	1.34649	1.32908	0.0227	0.139389	no
XLOC_001907	XLOC_001907	CG9641	2L:2974858-2976862	Wild Type	ZnF2 Mutant	OK	12.0786	5.63284	-1.10052	-1.33523	0.02275	0.139455	no
XLOC_006825	XLOC_006825	mRpL46	3L:1777438-1778347	Wild Type	ZnF2 Mutant	OK	9.5191	22.1912	1.22109	1.40572	0.02275	0.139455	no
XLOC_010807	XLOC_010807	Akt1	3R:16099227-16105670	Wild Type	ZnF2 Mutant	OK	25.8008	40.1449	0.637803	1.34779	0.0228	0.13964	no
XLOC_000503	XLOC_000503	DLP	2L:6480660-6488756	Wild Type	ZnF2 Mutant	OK	7.72408	4.25801	-0.859183	-1.35695	0.0229	0.140131	no
XLOC_001757	XLOC_001757	Pino	2L:1114653-1128953	Wild Type	ZnF2 Mutant	OK	64.3772	41.3788	-0.637656	-1.31912	0.02295	0.140195	no
XLOC_002414	XLOC_002414	Uhg2,snoRNA:Me18S-A1576	2L:9893804-9895003	Wild Type	ZnF2 Mutant	OK	37.766	84.904	1.16874	1.14502	0.02295	0.140195	no
XLOC_010678	XLOC_010678	foxo	3R:14056944-14087978	Wild Type	ZnF2 Mutant	OK	3.22442	0.904214	-1.8343	-1.50971	0.02305	0.140684	no
XLOC_007521	XLOC_007521	CG6928	3L:12003154-12008051	Wild Type	ZnF2 Mutant	OK	0.617312	2.18924	1.82636	1.51046	0.0231	0.140868	no
XLOC_005607	XLOC_005607	Ack-like	2R:13142833-13152677	Wild Type	ZnF2 Mutant	OK	3.66168	6.79916	0.892852	1.33242	0.0232	0.141356	no
XLOC_002249	XLOC_002249	RapGAP1	2L:7497804-7578980	Wild Type	ZnF2 Mutant	OK	8.82916	14.9911	0.763762	1.32876	0.0233	0.141844	no
XLOC_005696	XLOC_005696	CG8485	2R:14235786-14239703	Wild Type	ZnF2 Mutant	OK	35.6101	22.6031	-0.655764	-1.30418	0.02345	0.142512	no
XLOC_013168	XLOC_013168	CG13409	3R:22029439-22031900	Wild Type	ZnF2 Mutant	OK	0.251212	1.14314	2.18603	1.33332	0.02345	0.142512	no
XLOC_008035	XLOC_008035	CG32221	3L:19834669-19836413	Wild Type	ZnF2 Mutant	OK	3.38552	1.12473	-1.58979	-1.30042	0.0235	0.142571	no
XLOC_005585	XLOC_005585	Nacalpha	2R:12757545-12760999	Wild Type	ZnF2 Mutant	OK	45.6958	87.9524	0.944663	1.37722	0.0235	0.142571	no
XLOC_009995	XLOC_009995	lost	3R:4403075-4407182	Wild Type	ZnF2 Mutant	OK	174.947	125.732	-0.476561	-1.30825	0.02355	0.142752	no
XLOC_011959	XLOC_011959	CG9775	3R:4638009-4641838	Wild Type	ZnF2 Mutant	OK	509.886	684.428	0.424724	1.31104	0.0237	0.143538	no
XLOC_001148	XLOC_001148	stc	2L:15113479-15118069	Wild Type	ZnF2 Mutant	OK	88.0708	61.6722	-0.514042	-1.31613	0.02375	0.143595	no
XLOC_001110	XLOC_001110	noc	2L:14490858-14494019	Wild Type	ZnF2 Mutant	OK	26.0162	40.8421	0.650649	1.32318	0.02375	0.143595	no
XLOC_001792	XLOC_001792	CG17712	2L:1750686-1752122	Wild Type	ZnF2 Mutant	OK	1.43372	4.57396	1.67368	1.40836	0.0239	0.144379	no
XLOC_001040	XLOC_001040	CG7110	2L:13398857-13411047	Wild Type	ZnF2 Mutant	OK	21.6625	13.0219	-0.734261	-1.28501	0.02395	0.144434	no
XLOC_009104	XLOC_009104	GlcAT-P	3L:11176953-11197536	Wild Type	ZnF2 Mutant	OK	1.81146	4.87163	1.42725	1.57708	0.02395	0.144434	no
XLOC_011471	XLOC_011471	CG11857	3R:25258897-25260759	Wild Type	ZnF2 Mutant	OK	72.0772	46.6583	-0.627408	-1.29934	0.024	0.144613	no
XLOC_005402	XLOC_005402	whd	2R:10468615-10478795	Wild Type	ZnF2 Mutant	OK	61.5835	35.0836	-0.811748	-1.36526	0.02405	0.144668	no
XLOC_003954	XLOC_003954	mip120	2R:13506429-13513112	Wild Type	ZnF2 Mutant	OK	30.0503	58.3334	0.956944	1.50955	0.02405	0.144668	no
XLOC_007585	XLOC_007585	CG11263	3L:13006816-13007881	Wild Type	ZnF2 Mutant	OK	21.8631	10.7156	-1.02879	-1.33022	0.0241	0.144723	no
XLOC_010712	XLOC_010712	Hexim	3R:14659437-14663197	Wild Type	ZnF2 Mutant	OK	107.904	66.1412	-0.706132	-1.38177	0.0241	0.144723	no
XLOC_000076	XLOC_000076	kraken	2L:852767-854539	Wild Type	ZnF2 Mutant	OK	83.273	52.8089	-0.657069	-1.30602	0.02415	0.144777	no
XLOC_004233	XLOC_004233	CG9640	2R:17044742-17046768	Wild Type	ZnF2 Mutant	OK	1.96911	5.32153	1.4343	1.47196	0.02415	0.144777	no
XLOC_001071	XLOC_001071	Orc5	2L:13829836-13833105	Wild Type	ZnF2 Mutant	OK	13.7773	25.8084	0.905543	1.29679	0.0242	0.144954	no
XLOC_012917	XLOC_012917	CG7218	3R:18161391-18164397	Wild Type	ZnF2 Mutant	OK	22.5307	13.1288	-0.779156	-1.30153	0.02435	0.145606	no
XLOC_007502	XLOC_007502	Klp68D	3L:11795613-11798875	Wild Type	ZnF2 Mutant	OK	0.345804	1.86798	2.43346	1.55346	0.02435	0.145606	no
XLOC_002706	XLOC_002706	tam	2L:13823979-13827772	Wild Type	ZnF2 Mutant	OK	19.4711	11.8078	-0.721601	-1.31855	0.0244	0.145659	no
XLOC_010985	XLOC_010985	CG7685	3R:18404939-18406002	Wild Type	ZnF2 Mutant	OK	5.69643	14.2477	1.3226	1.40353	0.0244	0.145659	no
XLOC_002295	XLOC_002295	CG12375	2L:8124328-8126890	Wild Type	ZnF2 Mutant	OK	2.22701	7.13428	1.67966	1.38383	0.0245	0.14594	no
XLOC_008934	XLOC_008934	Idh	3L:8356403-8360906	Wild Type	ZnF2 Mutant	OK	34.9747	19.1208	-0.871172	-1.41866	0.02455	0.14594	no
XLOC_005107	XLOC_005107	CG30156,vimar	2R:6975284-6985712	Wild Type	ZnF2 Mutant	OK	35.3484	22.6088	-0.644763	-1.27511	0.02455	0.14594	no
XLOC_011119	XLOC_011119	Synd	3R:20832798-20840118	Wild Type	ZnF2 Mutant	OK	53.5351	34.2997	-0.642291	-1.29654	0.02455	0.14594	no
XLOC_004072	XLOC_004072	chn	2R:15115235-15144783	Wild Type	ZnF2 Mutant	OK	35.6952	23.8853	-0.579608	-1.30219	0.02455	0.14594	no
XLOC_010188	XLOC_010188	CG10050	3R:7249794-7251957	Wild Type	ZnF2 Mutant	OK	0.64737	2.4228	1.90401	1.45491	0.0246	0.146114	no
XLOC_004665	XLOC_004665	CG10321	2R:21634678-21638399	Wild Type	ZnF2 Mutant	OK	16.4843	26.2893	0.673383	1.28171	0.02465	0.146166	no
XLOC_004360	XLOC_004360	CG10915	2R:18160719-18167140	Wild Type	ZnF2 Mutant	OK	5.41749	13.2784	1.29339	1.25389	0.02465	0.146166	no
XLOC_003960	XLOC_003960	link	2R:13555948-13557342	Wild Type	ZnF2 Mutant	OK	616.693	829.452	0.427607	1.26415	0.02485	0.147105	no
XLOC_001394	XLOC_001394	CG10495	2L:19063294-19064726	Wild Type	ZnF2 Mutant	OK	2.71236	7.11745	1.39181	1.36919	0.02485	0.147105	no
XLOC_004930	XLOC_004930	Brca2	2R:24526171-24531272	Wild Type	ZnF2 Mutant	OK	0.273225	1.36897	2.32493	1.48307	0.0249	0.147278	no
XLOC_008389	XLOC_008389	CkIIalpha-i3	3L:708600-710607	Wild Type	ZnF2 Mutant	OK	19.584	10.3799	-0.91588	-1.26893	0.025	0.147746	no
XLOC_001024	XLOC_001024	CG31728	2L:13251508-13257426	Wild Type	ZnF2 Mutant	OK	0.248613	1.2687	2.35138	1.5105	0.02515	0.148509	no
XLOC_002624	XLOC_002624	SC35	2L:12431074-12441279	Wild Type	ZnF2 Mutant	OK	143.334	239.176	0.738695	1.35039	0.0253	0.149146	no
XLOC_006535	XLOC_006535	Rrp4	2R:23555017-23556217	Wild Type	ZnF2 Mutant	OK	24.1076	42.3219	0.811917	1.30258	0.0253	0.149146	no
XLOC_008215	XLOC_008215	CG7458	3L:21955109-21958041	Wild Type	ZnF2 Mutant	OK	6.64636	2.93823	-1.17762	-1.29238	0.02535	0.149192	no
XLOC_006868	XLOC_006868	dos	3L:2589413-2595590	Wild Type	ZnF2 Mutant	OK	15.4029	24.9505	0.695862	1.32139	0.02535	0.149192	no
XLOC_013212	XLOC_013212	wge	3R:22710882-22721150	Wild Type	ZnF2 Mutant	OK	14.3366	8.75156	-0.712087	-1.33382	0.02545	0.149656	no
XLOC_005169	XLOC_005169	CG34216	2R:7703505-7705095	Wild Type	ZnF2 Mutant	OK	7.67879	3.38511	-1.18168	-1.30028	0.0255	0.149701	no
XLOC_012421	XLOC_012421	Tpc1	3R:10879571-10882188	Wild Type	ZnF2 Mutant	OK	0.916493	3.26464	1.83273	1.48018	0.0255	0.149701	no
XLOC_003328	XLOC_003328	CG17508	2R:5608634-5611586	Wild Type	ZnF2 Mutant	OK	148.529	99.6435	-0.5759	-1.27849	0.02555	0.149871	no
XLOC_009792	XLOC_009792	CG4074	3L:20768206-20769482	Wild Type	ZnF2 Mutant	OK	5.08962	12.7201	1.32147	1.38816	0.0257	0.150626	no
XLOC_002430	XLOC_002430	CG5850,CR44872	2L:9954324-9963949	Wild Type	ZnF2 Mutant	OK	41.4789	10.453	-1.98846	-1.72266	0.0258	0.150713	no
XLOC_008435	XLOC_008435	CG12084	3L:1490950-1496643	Wild Type	ZnF2 Mutant	OK	24.0774	14.5708	-0.724599	-1.29482	0.0258	0.150713	no
XLOC_003741	XLOC_003741	CG7737	2R:11222870-11232516	Wild Type	ZnF2 Mutant	OK	74.9723	50.5941	-0.567389	-1.27527	0.0258	0.150713	no
XLOC_003495	XLOC_003495	sut1	2R:8080558-8087151	Wild Type	ZnF2 Mutant	OK	2.66358	10.1307	1.9273	1.60929	0.0258	0.150713	no
XLOC_005028	XLOC_005028	scaf	2R:5676749-5691723	Wild Type	ZnF2 Mutant	OK	2.19744	0.69131	-1.66842	-1.35866	0.02585	0.15088	no
XLOC_006075	XLOC_006075	EndoB	2R:19307446-19310665	Wild Type	ZnF2 Mutant	OK	29.9333	18.2254	-0.715796	-1.28613	0.026	0.151631	no
XLOC_010043	XLOC_010043	CG1172	3R:5393921-5399510	Wild Type	ZnF2 Mutant	OK	69.8921	45.4728	-0.620125	-1.30091	0.0261	0.152089	no
XLOC_011595	XLOC_011595	IntS12	3R:26863375-26864559	Wild Type	ZnF2 Mutant	OK	26.4847	14.7013	-0.849218	-1.24802	0.02615	0.15213	no
XLOC_006774	XLOC_006774	Rabex-5	3L:1295912-1298497	Wild Type	ZnF2 Mutant	OK	3.19253	6.55452	1.03779	1.24113	0.02615	0.15213	no
XLOC_007218	XLOC_007218	ldbr	3L:8121826-8124531	Wild Type	ZnF2 Mutant	OK	50.6635	77.3885	0.611174	1.28902	0.0263	0.152751	no
XLOC_007329	XLOC_007329	Shc	3L:9427009-9428671	Wild Type	ZnF2 Mutant	OK	15.2011	27.0414	0.83099	1.28054	0.0263	0.152751	no
XLOC_002234	XLOC_002234	Ndae1	2L:7223327-7249343	Wild Type	ZnF2 Mutant	OK	18.0937	29.1038	0.685721	1.35237	0.02655	0.154077	no
XLOC_004460	XLOC_004460	Tab2	2R:19292528-19304508	Wild Type	ZnF2 Mutant	OK	12.1409	6.88444	-0.818464	-1.27026	0.02665	0.154531	no
XLOC_002428	XLOC_002428	CG13126	2L:9952071-9954181	Wild Type	ZnF2 Mutant	OK	18.3122	10.0589	-0.864334	-1.30201	0.0267	0.154694	no
XLOC_009582	XLOC_009582	CG5567	3L:17841539-17843544	Wild Type	ZnF2 Mutant	OK	15.0325	7.01187	-1.10022	-1.3089	0.02685	0.155309	no
XLOC_005186	XLOC_005186	CG8728	2R:7936865-7939114	Wild Type	ZnF2 Mutant	OK	5.14854	9.93732	0.948694	1.21932	0.02685	0.155309	no
XLOC_003146	XLOC_003146	CG31678	2L:20656425-20675941	Wild Type	ZnF2 Mutant	OK	14.9254	8.96423	-0.735515	-1.28893	0.02695	0.155633	no
XLOC_000352	XLOC_000352	CG17840	2L:4465173-4477022	Wild Type	ZnF2 Mutant	OK	3.90072	7.9536	1.02787	1.30188	0.02695	0.155633	no
XLOC_000832	XLOC_000832	CG6144	2L:10488693-10491454	Wild Type	ZnF2 Mutant	OK	30.7384	17.9761	-0.773959	-1.26168	0.02705	0.155829	no
XLOC_010853	XLOC_010853	Fas1	3R:16625237-16639771	Wild Type	ZnF2 Mutant	OK	153.92	110.735	-0.475065	-1.27865	0.02705	0.155829	no
XLOC_007198	XLOC_007198	CG12262	3L:7650547-7759123	Wild Type	ZnF2 Mutant	OK	283.243	396.032	0.48358	1.28434	0.02705	0.155829	no
XLOC_001855	XLOC_001855	Rab5	2L:2359141-2365273	Wild Type	ZnF2 Mutant	OK	115.839	78.0605	-0.569452	-1.32188	0.02735	0.157429	no
XLOC_002219	XLOC_002219	ade3	2L:7013395-7023898	Wild Type	ZnF2 Mutant	OK	18.7791	31.8566	0.762461	1.2493	0.0274	0.157461	no
XLOC_004948	XLOC_004948	CG3663	2R:24661502-24662409	Wild Type	ZnF2 Mutant	OK	3.79417	9.63067	1.34385	1.23218	0.0274	0.157461	no
XLOC_004836	XLOC_004836	Sesn	2R:23713899-23734846	Wild Type	ZnF2 Mutant	OK	5.99318	2.62328	-1.19195	-1.34883	0.02745	0.15762	no
XLOC_010473	XLOC_010473	CG5214	3R:11244301-11246862	Wild Type	ZnF2 Mutant	OK	111.407	76.6211	-0.54002	-1.25589	0.0275	0.15778	no
XLOC_005482	XLOC_005482	en	2R:11524005-11528210	Wild Type	ZnF2 Mutant	OK	1.29218	3.1747	1.29681	1.16657	0.02755	0.157938	no
XLOC_000827	XLOC_000827	Nse4	2L:10439439-10441047	Wild Type	ZnF2 Mutant	OK	87.0672	54.1104	-0.686223	-1.28584	0.02765	0.158383	no
XLOC_005031	XLOC_005031	ZnT41F	2R:5774775-5782858	Wild Type	ZnF2 Mutant	OK	4.04613	1.45103	-1.47946	-1.25586	0.0277	0.158542	no
XLOC_010831	XLOC_010831	pad	3R:16342317-16349226	Wild Type	ZnF2 Mutant	OK	4.36685	8.45166	0.952643	1.29107	0.0278	0.158985	no
XLOC_012231	XLOC_012231	CG11693	3R:8308880-8310778	Wild Type	ZnF2 Mutant	OK	0.608873	0.163366	-1.89803	-1.13904	0.02785	0.159143	no
XLOC_013255	XLOC_013255	CG4449	3R:23249442-23251477	Wild Type	ZnF2 Mutant	OK	11.1333	21.7631	0.966999	1.35587	0.02795	0.159585	no
XLOC_001425	XLOC_001425	swm	2L:19490261-19497978	Wild Type	ZnF2 Mutant	OK	51.9279	33.3142	-0.640373	-1.34077	0.02805	0.160027	no
XLOC_002640	XLOC_002640	CG17036	2L:12698917-12700746	Wild Type	ZnF2 Mutant	OK	1.22515	0.290445	-2.07662	-1.20693	0.0281	0.160055	no
XLOC_002600	XLOC_002600	Tom70	2L:12034189-12038511	Wild Type	ZnF2 Mutant	OK	17.3623	9.63726	-0.849263	-1.31166	0.0281	0.160055	no
XLOC_006702	XLOC_006702	CG16940	3L:212708-216479	Wild Type	ZnF2 Mutant	OK	27.0457	17.0935	-0.661946	-1.27031	0.02825	0.160522	no
XLOC_008429	XLOC_008429	Ptp61F	3L:1342492-1475257	Wild Type	ZnF2 Mutant	OK	268.479	188.677	-0.50889	-1.28451	0.02825	0.160522	no
XLOC_006426	XLOC_006426	qkr58E-1	2R:22411788-22415518	Wild Type	ZnF2 Mutant	OK	90.9262	135.571	0.576282	1.29322	0.02825	0.160522	no
XLOC_005904	XLOC_005904	NiPp1	2R:17001993-17005149	Wild Type	ZnF2 Mutant	OK	5.3138	16.1416	1.60297	1.45067	0.0284	0.161245	no
XLOC_002267	XLOC_002267	Herp	2L:7796313-7800058	Wild Type	ZnF2 Mutant	OK	6.66389	12.8437	0.94662	1.30718	0.02845	0.16127	no
XLOC_000374	XLOC_000374	betaggt-I	2L:4945578-4949784	Wild Type	ZnF2 Mutant	OK	1.95312	5.78192	1.56577	1.36216	0.02845	0.16127	no
XLOC_003838	XLOC_003838	CG30046	2R:12314116-12317573	Wild Type	ZnF2 Mutant	OK	8.91378	4.6527	-0.937969	-1.29243	0.02855	0.161578	no
XLOC_004464	XLOC_004464	CG11961	2R:19357531-19363124	Wild Type	ZnF2 Mutant	OK	1.94122	4.77659	1.29901	1.39882	0.02855	0.161578	no
XLOC_006329	XLOC_006329	CG9752	2R:21293767-21295588	Wild Type	ZnF2 Mutant	OK	2.31486	27.1978	3.5545	0.843207	0.0287	0.162297	no
XLOC_001779	XLOC_001779	CG18132	2L:1516794-1517478	Wild Type	ZnF2 Mutant	OK	2.52138	0.619941	-2.02401	-1.11373	0.02875	0.162321	no
XLOC_005669	XLOC_005669	CG6543	2R:13846392-13854331	Wild Type	ZnF2 Mutant	OK	393.407	281.306	-0.48388	-1.27481	0.02875	0.162321	no
XLOC_003134	XLOC_003134	CG2493	2L:20459341-20463444	Wild Type	ZnF2 Mutant	OK	89.6284	132.441	0.563317	1.25861	0.0288	0.162344	no
XLOC_004925	XLOC_004925	CG13581	2R:24506869-24507706	Wild Type	ZnF2 Mutant	OK	0	0.517269	inf	-nan	0.0288	0.162344	no
XLOC_000507	XLOC_000507	CG31637	2L:6498646-6526996	Wild Type	ZnF2 Mutant	OK	13.3576	7.52456	-0.827979	-1.27381	0.0289	0.162649	no
XLOC_006694	XLOC_006694	CG6845	3L:146432-149056	Wild Type	ZnF2 Mutant	OK	0.7165	2.40651	1.74791	1.26794	0.0289	0.162649	no
XLOC_006568	XLOC_006568	CG4882	2R:23878196-23882927	Wild Type	ZnF2 Mutant	OK	11.8816	21.9114	0.882946	1.25963	0.029	0.163082	no
XLOC_011087	XLOC_011087	Sirt2	3R:20328464-20330915	Wild Type	ZnF2 Mutant	OK	1.44725	4.33886	1.58401	1.36294	0.0291	0.163514	no
XLOC_009411	XLOC_009411	comm2	3L:15697593-15699850	Wild Type	ZnF2 Mutant	OK	23.0304	38.8038	0.752656	1.26526	0.0292	0.163946	no
XLOC_000370	XLOC_000370	CG15625	2L:4889994-4891277	Wild Type	ZnF2 Mutant	OK	4.52923	1.55676	-1.54072	-1.30893	0.0293	0.163987	no
XLOC_003313	XLOC_003313	conu	2R:4744347-4758048	Wild Type	ZnF2 Mutant	OK	102.112	68.4063	-0.577947	-1.26583	0.0293	0.163987	no
XLOC_011145	XLOC_011145	CG5793	3R:21127572-21129717	Wild Type	ZnF2 Mutant	OK	2.53511	8.135	1.68209	1.37632	0.0293	0.163987	no
XLOC_011754	XLOC_011754	Dr	3R:29556385-29565244	Wild Type	ZnF2 Mutant	OK	0.359333	1.9669	2.45253	1.41493	0.0293	0.163987	no
XLOC_009782	XLOC_009782	CG4825	3L:20522439-20526174	Wild Type	ZnF2 Mutant	OK	156.748	111.204	-0.49524	-1.25914	0.02935	0.164137	no
XLOC_008756	XLOC_008756	CG13295	3L:6072138-6075245	Wild Type	ZnF2 Mutant	OK	2.26551	6.24036	1.4618	1.33138	0.0294	0.164287	no
XLOC_011138	XLOC_011138	AnxB9	3R:21065240-21073319	Wild Type	ZnF2 Mutant	OK	239.277	144.949	-0.723135	-1.28001	0.02965	0.165423	no
XLOC_001780	XLOC_001780	halo	2L:1517532-1518148	Wild Type	ZnF2 Mutant	OK	2144.31	2811.87	0.391017	1.2559	0.02965	0.165423	no
XLOC_007624	XLOC_007624	ImpL1	3L:13382764-13383999	Wild Type	ZnF2 Mutant	OK	3.69589	0.833185	-2.14921	-1.36237	0.0297	0.165572	no
XLOC_006550	XLOC_006550	egl	2R:23734903-23746829	Wild Type	ZnF2 Mutant	OK	1.848	0.60249	-1.61696	-1.33031	0.0298	0.165738	no
XLOC_008390	XLOC_008390	CG13896	3L:710819-711850	Wild Type	ZnF2 Mutant	OK	14.3606	6.26599	-1.1965	-1.34915	0.0298	0.165738	no
XLOC_007271	XLOC_007271	CG6511	3L:8721323-8726108	Wild Type	ZnF2 Mutant	OK	2.32162	4.78446	1.04323	1.2856	0.0298	0.165738	no
XLOC_006243	XLOC_006243	CG13868	2R:20308776-20316917	Wild Type	ZnF2 Mutant	OK	96.4608	68.2186	-0.499778	-1.25465	0.02985	0.165885	no
XLOC_003154	XLOC_003154	vari	2L:20787655-20797042	Wild Type	ZnF2 Mutant	OK	44.9327	19.0895	-1.23499	-1.28116	0.0299	0.166033	no
XLOC_009984	XLOC_009984	CG9795	3R:4319682-4326379	Wild Type	ZnF2 Mutant	OK	58.5814	37.5483	-0.641696	-1.29605	0.02995	0.16618	no
XLOC_008135	XLOC_008135	Sin	3L:21031824-21034203	Wild Type	ZnF2 Mutant	OK	9.91103	18.5504	0.904346	1.26262	0.03005	0.166474	no
XLOC_003952	XLOC_003952	cid	2R:13485616-13486631	Wild Type	ZnF2 Mutant	OK	5.77268	12.5529	1.12071	1.22195	0.03005	0.166474	no
XLOC_003544	XLOC_003544	ptc	2R:8649648-8665223	Wild Type	ZnF2 Mutant	OK	48.8132	69.0332	0.500017	1.24334	0.0302	0.167044	no
XLOC_010799	XLOC_010799	Hel89B	3R:15973297-15983451	Wild Type	ZnF2 Mutant	OK	10.1753	15.75	0.630272	1.25477	0.0302	0.167044	no
XLOC_008082	XLOC_008082	fbl	3L:20384428-20393553	Wild Type	ZnF2 Mutant	OK	79.9063	52.4552	-0.607222	-1.2624	0.0303	0.167205	no
XLOC_013736	XLOC_013736	Mgat2	3R:30015512-30022221	Wild Type	ZnF2 Mutant	OK	7.94521	14.0607	0.823515	1.25874	0.0303	0.167205	no
XLOC_012215	XLOC_012215	grn	3R:8147367-8181444	Wild Type	ZnF2 Mutant	OK	0.512485	1.56252	1.6083	1.28984	0.0303	0.167205	no
XLOC_003595	XLOC_003595	Hydr1	2R:9132479-9137933	Wild Type	ZnF2 Mutant	OK	33.6416	18.2876	-0.879375	-1.2545	0.03035	0.16722	no
XLOC_013667	XLOC_013667	CG11882	3R:29147015-29148172	Wild Type	ZnF2 Mutant	OK	4.63986	11.4632	1.30485	1.33775	0.03035	0.16722	no
XLOC_001065	XLOC_001065	CG16863	2L:13790958-13793264	Wild Type	ZnF2 Mutant	OK	3.49076	7.08867	1.02197	1.26242	0.03045	0.167395	no
XLOC_010440	XLOC_010440	CG42394	3R:10849824-10851788	Wild Type	ZnF2 Mutant	OK	20.639	42.1791	1.03115	1.2867	0.03045	0.167395	no
XLOC_010823	XLOC_010823	gish	3R:16272451-16304768	Wild Type	ZnF2 Mutant	OK	164.605	117.157	-0.490562	-1.25134	0.0305	0.167395	no
XLOC_003845	XLOC_003845	Den1	2R:12337796-12339544	Wild Type	ZnF2 Mutant	OK	19.114	33.2813	0.800085	1.24908	0.0305	0.167395	no
XLOC_002050	XLOC_002050	CG8892	2L:4979512-4981592	Wild Type	ZnF2 Mutant	OK	9.84673	17.6542	0.842294	1.26602	0.0305	0.167395	no
XLOC_007481	XLOC_007481	CG18815	3L:11628036-11630749	Wild Type	ZnF2 Mutant	OK	13.7857	24.6868	0.84057	1.27459	0.0306	0.167814	no
XLOC_005581	XLOC_005581	CG8768	2R:12691307-12692690	Wild Type	ZnF2 Mutant	OK	16.8175	30.017	0.835814	1.27106	0.0308	0.16878	no
XLOC_013662	XLOC_013662	alpha-Man-Ib	3R:29109052-29112822	Wild Type	ZnF2 Mutant	OK	8.99153	4.79799	-0.906137	-1.2642	0.03095	0.169471	no
XLOC_006807	XLOC_006807	CG13917	3L:1576698-1602674	Wild Type	ZnF2 Mutant	OK	4.17396	9.88104	1.24325	1.36995	0.0311	0.170161	no
XLOC_003713	XLOC_003713	CG7220	2R:10729577-10738370	Wild Type	ZnF2 Mutant	OK	71.903	45.9158	-0.647064	-1.22881	0.03115	0.170303	no
XLOC_012691	XLOC_012691	CG31313	3R:14565926-14567429	Wild Type	ZnF2 Mutant	OK	22.1217	4.86761	-2.18418	-1.50614	0.0312	0.170313	no
XLOC_010302	XLOC_010302	hng2	3R:8806321-8807581	Wild Type	ZnF2 Mutant	OK	38.2972	22.0893	-0.793892	-1.21629	0.0312	0.170313	no
XLOC_002442	XLOC_002442	CG5734	2L:10204756-10206961	Wild Type	ZnF2 Mutant	OK	5.78802	11.1481	0.945657	1.27074	0.03135	0.171	no
XLOC_006599	XLOC_006599	yki	2R:24065974-24068485	Wild Type	ZnF2 Mutant	OK	11.8048	22.4623	0.928135	1.3108	0.03175	0.173048	no
XLOC_003326	XLOC_003326	laccase2	2R:5413743-5456095	Wild Type	ZnF2 Mutant	OK	18.7872	11.302	-0.733172	-1.21868	0.03185	0.173327	no
XLOC_013409	XLOC_013409	OstStt3	3R:25065790-25069637	Wild Type	ZnF2 Mutant	OK	28.589	49.8273	0.801476	1.27609	0.03185	0.173327	no
XLOC_006806	XLOC_006806	CG12004	3L:1569180-1576330	Wild Type	ZnF2 Mutant	OK	44.0081	66.8939	0.604104	1.25412	0.03195	0.173737	no
XLOC_004824	XLOC_004824	apt	2R:23564890-23600787	Wild Type	ZnF2 Mutant	OK	57.9593	38.4973	-0.590282	-1.24863	0.03205	0.174014	no
XLOC_012934	XLOC_012934	l(3)05822	3R:18288865-18298879	Wild Type	ZnF2 Mutant	OK	101.78	72.1072	-0.497244	-1.22966	0.03205	0.174014	no
XLOC_002613	XLOC_002613	Rab6	2L:12107220-12109116	Wild Type	ZnF2 Mutant	OK	10.8431	19.3494	0.835512	1.25801	0.03215	0.174423	no
XLOC_003371	XLOC_003371	jing	2R:6502005-6621792	Wild Type	ZnF2 Mutant	OK	63.1423	45.0346	-0.487571	-1.23988	0.0322	0.17456	no
XLOC_010064	XLOC_010064	Sec23	3R:5649064-5652629	Wild Type	ZnF2 Mutant	OK	72.9093	50.0877	-0.541646	-1.25537	0.03225	0.174698	no
XLOC_001438	XLOC_001438	msb1l	2L:19577700-19580351	Wild Type	ZnF2 Mutant	OK	322.675	438.839	0.443609	1.22204	0.0323	0.174835	no
XLOC_006401	XLOC_006401	GM130	2R:22124566-22127502	Wild Type	ZnF2 Mutant	OK	50.8261	34.3868	-0.563716	-1.21528	0.0325	0.175649	no
XLOC_004066	XLOC_004066	ckn	2R:14963291-14980795	Wild Type	ZnF2 Mutant	OK	20.5681	31.5425	0.616887	1.24742	0.0325	0.175649	no
XLOC_005168	XLOC_005168	CG1399	2R:7676539-7698902	Wild Type	ZnF2 Mutant	OK	15.0845	9.51062	-0.665451	-1.2435	0.03275	0.176596	no
XLOC_002395	XLOC_002395	CG31709,gcm	2L:9578119-9581745	Wild Type	ZnF2 Mutant	OK	1.69644	4.07508	1.26431	1.16457	0.03275	0.176596	no
XLOC_011116	XLOC_011116	snoRNA:Psi28S-2562	3R:20822180-20824239	Wild Type	ZnF2 Mutant	OK	0	12.1701	inf	-nan	0.03275	0.176596	no
XLOC_006986	XLOC_006986	Ras64B	3L:4139075-4141398	Wild Type	ZnF2 Mutant	OK	28.6033	17.1397	-0.738844	-1.21304	0.03305	0.177942	no
XLOC_011100	XLOC_011100	Srp72	3R:20588710-20592671	Wild Type	ZnF2 Mutant	OK	2.20336	8.89137	2.0127	1.43648	0.03305	0.177942	no
XLOC_011502	XLOC_011502	jigr1	3R:25637842-25650397	Wild Type	ZnF2 Mutant	OK	346.08	254.73	-0.442137	-1.23221	0.03325	0.178883	no
XLOC_005309	XLOC_005309	Myd88	2R:9302822-9308722	Wild Type	ZnF2 Mutant	OK	15.7327	8.50232	-0.887834	-1.27099	0.03335	0.179149	no
XLOC_004134	XLOC_004134	Asph	2R:16110330-16116996	Wild Type	ZnF2 Mutant	OK	37.2593	55.4533	0.573671	1.26064	0.03335	0.179149	no
XLOC_003193	XLOC_003193	CG8679	2L:21212321-21220572	Wild Type	ZnF2 Mutant	OK	43.2821	27.5284	-0.652851	-1.23353	0.03355	0.180086	no
XLOC_013314	XLOC_013314	Gdh	3R:23933911-23943101	Wild Type	ZnF2 Mutant	OK	339.778	240.877	-0.496296	-1.22899	0.0336	0.180218	no
XLOC_008693	XLOC_008693	CG10674	3L:5133870-5136292	Wild Type	ZnF2 Mutant	OK	49.3922	18.0282	-1.45403	-1.27773	0.03365	0.18035	no
XLOC_006673	XLOC_006673	CG2765	2R:24959840-24965076	Wild Type	ZnF2 Mutant	OK	25.8247	15.3881	-0.746939	-1.24969	0.03375	0.180612	no
XLOC_008925	XLOC_008925	CG7197	3L:8297017-8299839	Wild Type	ZnF2 Mutant	OK	163.226	111.268	-0.55283	-1.24647	0.03375	0.180612	no
XLOC_010486	XLOC_010486	CG17230	3R:11437546-11467372	Wild Type	ZnF2 Mutant	OK	0.420315	2.80005	2.73591	1.10387	0.0339	0.181271	no
XLOC_000795	XLOC_000795	CG4953	2L:10266702-10268748	Wild Type	ZnF2 Mutant	OK	20.9506	12.3615	-0.761143	-1.17447	0.03395	0.181271	no
XLOC_003664	XLOC_003664	Etf-QO	2R:9910892-9913488	Wild Type	ZnF2 Mutant	OK	35.0048	22.2839	-0.651549	-1.2178	0.03395	0.181271	no
XLOC_000895	XLOC_000895	cana	2L:11269779-11277846	Wild Type	ZnF2 Mutant	OK	5.3199	2.93998	-0.855596	-1.22098	0.0341	0.181935	no
XLOC_010051	XLOC_010051	CG12746	3R:5564864-5567435	Wild Type	ZnF2 Mutant	OK	42.8648	26.3449	-0.702267	-1.23236	0.03415	0.182065	no
XLOC_002704	XLOC_002704	adat	2L:13803625-13811474	Wild Type	ZnF2 Mutant	OK	0.595228	2.53446	2.09016	1.00093	0.03425	0.18246	no
XLOC_011985	XLOC_011985	CR45588	3R:5053180-5053738	Wild Type	ZnF2 Mutant	OK	2.93057	0.744984	-1.9759	-1.14808	0.0343	0.182589	no
XLOC_007828	XLOC_007828	RAF2	3L:16386326-16390816	Wild Type	ZnF2 Mutant	OK	53.7637	37.4862	-0.520272	-1.2132	0.0344	0.182984	no
XLOC_004877	XLOC_004877	CG3163	2R:24029316-24031427	Wild Type	ZnF2 Mutant	OK	16.1105	28.3717	0.816447	1.22359	0.03445	0.183113	no
XLOC_004163	XLOC_004163	CG4282	2R:16322185-16324801	Wild Type	ZnF2 Mutant	OK	46.6142	30.325	-0.620259	-1.25095	0.03455	0.183497	no
XLOC_002190	XLOC_002190	homer	2L:6719393-6723359	Wild Type	ZnF2 Mutant	OK	120.682	84.269	-0.518137	-1.23642	0.0346	0.183497	no
XLOC_000091	XLOC_000091	CG4552	2L:1129315-1134098	Wild Type	ZnF2 Mutant	OK	6.12282	10.788	0.817159	1.19008	0.0346	0.183497	no
XLOC_002240	XLOC_002240	CG5149	2L:7384485-7388253	Wild Type	ZnF2 Mutant	OK	36.9372	23.3004	-0.664719	-1.19601	0.03475	0.184154	no
XLOC_006957	XLOC_006957	CG12006	3L:3811262-3813958	Wild Type	ZnF2 Mutant	OK	151.084	109.161	-0.4689	-1.19928	0.0348	0.184281	no
XLOC_009296	XLOC_009296	Vps36	3L:13511645-13513112	Wild Type	ZnF2 Mutant	OK	6.72937	13.4463	0.998668	1.19663	0.03485	0.184408	no
XLOC_000879	XLOC_000879	Nup154	2L:11004819-11011086	Wild Type	ZnF2 Mutant	OK	35.1342	22.1573	-0.665091	-1.26936	0.0349	0.184535	no
XLOC_005003	XLOC_005003	uex	2R:3900284-3949757	Wild Type	ZnF2 Mutant	OK	22.35	13.4328	-0.734513	-1.21711	0.03495	0.184661	no
XLOC_013167	XLOC_013167	Cchl	3R:22025974-22027480	Wild Type	ZnF2 Mutant	OK	127.263	86.1316	-0.563194	-1.22211	0.035	0.184787	no
XLOC_006014	XLOC_006014	Ote	2R:18275606-18277177	Wild Type	ZnF2 Mutant	OK	48.4474	72.9892	0.591264	1.19666	0.03505	0.184914	no
XLOC_011787	XLOC_011787	CG31038	3R:29877058-29903231	Wild Type	ZnF2 Mutant	OK	0.279177	1.25893	2.17294	1.22899	0.0351	0.185004	no
XLOC_004184	XLOC_004184	Cdk4	2R:16579469-16585448	Wild Type	ZnF2 Mutant	OK	83.1429	54.0043	-0.622519	-1.2555	0.03515	0.185004	no
XLOC_012020	XLOC_012020	CG2519	3R:5539509-5547775	Wild Type	ZnF2 Mutant	OK	30.2927	20.7201	-0.547939	-1.22121	0.03515	0.185004	no
XLOC_005425	XLOC_005425	CG30015	2R:10839101-10874771	Wild Type	ZnF2 Mutant	OK	57.7813	40.7885	-0.502441	-1.19573	0.0352	0.185004	no
XLOC_011953	XLOC_011953	CG31523	3R:4465420-4479207	Wild Type	ZnF2 Mutant	OK	103.913	72.8603	-0.51217	-1.23033	0.03525	0.185004	no
XLOC_013648	XLOC_013648	Apc	3R:28832300-28844748	Wild Type	ZnF2 Mutant	OK	2.29946	4.07168	0.824327	1.21768	0.03525	0.185004	no
XLOC_002197	XLOC_002197	nrv2	2L:6789769-6798862	Wild Type	ZnF2 Mutant	OK	0.766901	3.23571	2.07697	1.28362	0.03525	0.185004	no
XLOC_003143	XLOC_003143	CG17470	2L:20642305-20643244	Wild Type	ZnF2 Mutant	OK	0.951953	4.39552	2.20707	1.38973	0.0354	0.185653	no
XLOC_001810	XLOC_001810	CG15356	2L:1975462-1980755	Wild Type	ZnF2 Mutant	OK	4.85096	2.57542	-0.91346	-1.18551	0.03545	0.185752	no
XLOC_009697	XLOC_009697	ash1	3L:19590772-19598755	Wild Type	ZnF2 Mutant	OK	12.7518	18.8778	0.565987	1.20929	0.0355	0.185752	no
XLOC_004951	XLOC_004951	CG30421	2R:24743748-24756976	Wild Type	ZnF2 Mutant	OK	10.8425	17.0316	0.651519	1.1973	0.03555	0.185752	no
XLOC_008614	XLOC_008614	CG11593	3L:4035798-4040482	Wild Type	ZnF2 Mutant	OK	11.4547	18.9207	0.724026	1.1925	0.03555	0.185752	no
XLOC_011904	XLOC_011904	Ef1alpha100E	3R:31738467-31743306	Wild Type	ZnF2 Mutant	OK	2.77125	5.93227	1.09805	1.24589	0.03555	0.185752	no
XLOC_009834	XLOC_009834	AcCoAS	3L:21270721-21280243	Wild Type	ZnF2 Mutant	OK	4.29576	1.77595	-1.27433	-1.32665	0.0357	0.186261	no
XLOC_003310	XLOC_003310	CG17883	2R:4671852-4673639	Wild Type	ZnF2 Mutant	OK	57.7999	37.0972	-0.639755	-1.21041	0.0357	0.186261	no
XLOC_007221	XLOC_007221	CG7979	3L:8180922-8186671	Wild Type	ZnF2 Mutant	OK	28.654	12.1128	-1.2422	-1.4131	0.03585	0.186768	no
XLOC_007781	XLOC_007781	Taf4	3L:16113211-16121651	Wild Type	ZnF2 Mutant	OK	140.033	185.711	0.407288	1.20802	0.03585	0.186768	no
XLOC_003679	XLOC_003679	egr	2R:10078365-10084210	Wild Type	ZnF2 Mutant	OK	70.4076	46.9509	-0.584576	-1.20139	0.036	0.187259	no
XLOC_005880	XLOC_005880	Picot	2R:16655322-16667675	Wild Type	ZnF2 Mutant	OK	3.93493	0.452466	-3.12046	-2.00239	0.03605	0.187259	no
XLOC_007588	XLOC_007588	ste14	3L:13018265-13019687	Wild Type	ZnF2 Mutant	OK	4.63067	0.958661	-2.27213	-1.38577	0.03605	0.187259	no
XLOC_010171	XLOC_010171	alphaTub84B	3R:7086598-7088839	Wild Type	ZnF2 Mutant	OK	4556.08	5645.61	0.309336	1.19407	0.03605	0.187259	no
XLOC_009138	XLOC_009138	rt	3L:11584121-11587770	Wild Type	ZnF2 Mutant	OK	2.02324	4.36696	1.10996	1.22785	0.0363	0.188419	no
XLOC_013553	XLOC_013553	spz	3R:27064989-27070070	Wild Type	ZnF2 Mutant	OK	4.51114	1.85206	-1.28436	-1.2803	0.0364	0.1888	no
XLOC_004601	XLOC_004601	Act57B,snoRNA:660	2R:20944020-20946431	Wild Type	ZnF2 Mutant	OK	21.7265	0.335667	-6.01628	-2.67677	0.03645	0.188921	no
XLOC_012701	XLOC_012701	kibra	3R:14697688-14724261	Wild Type	ZnF2 Mutant	OK	7.8883	12.6153	0.677383	1.21638	0.03665	0.18968	no
XLOC_009844	XLOC_009844	ebd2	3L:21344032-21355049	Wild Type	ZnF2 Mutant	OK	4.20516	9.48425	1.17337	1.2495	0.03665	0.18968	no
XLOC_012826	XLOC_012826	CG14903	3R:16573178-16573752	Wild Type	ZnF2 Mutant	OK	68.0413	35.9129	-0.92191	-1.23601	0.03675	0.18992	no
XLOC_009856	XLOC_009856	Mkrn1	3L:21529958-21533713	Wild Type	ZnF2 Mutant	OK	152.337	110.302	-0.465804	-1.18746	0.03675	0.18992	no
XLOC_012750	XLOC_012750	CG34404,CG6171	3R:15361691-15367665	Wild Type	ZnF2 Mutant	OK	91.3931	48.6742	-0.908928	-1.25647	0.03685	0.190159	no
XLOC_005560	XLOC_005560	DUBAI	2R:12431446-12436990	Wild Type	ZnF2 Mutant	OK	17.3698	10.837	-0.680621	-1.18927	0.03685	0.190159	no
XLOC_012228	XLOC_012228	Sgt1	3R:8304189-8305274	Wild Type	ZnF2 Mutant	OK	172.694	119.671	-0.529145	-1.18523	0.0369	0.190278	no
XLOC_000519	XLOC_000519	Liprin-alpha	2L:6723902-6732766	Wild Type	ZnF2 Mutant	OK	17.7737	11.2677	-0.657551	-1.21295	0.037	0.190655	no
XLOC_009900	XLOC_009900	Rich	3L:22257748-22262921	Wild Type	ZnF2 Mutant	OK	13.2185	20.17	0.609653	1.20329	0.03705	0.190774	no
XLOC_006946	XLOC_006946	Eip63E	3L:3515750-3610521	Wild Type	ZnF2 Mutant	OK	70.8472	49.9056	-0.505508	-1.19969	0.03715	0.191129	no
XLOC_012748	XLOC_012748	Atg4b	3R:15351224-15356924	Wild Type	ZnF2 Mutant	OK	6.99517	2.11862	-1.72323	-1.34487	0.0372	0.191129	no
XLOC_003468	XLOC_003468	CanB2	2R:7786009-7789053	Wild Type	ZnF2 Mutant	OK	21.5044	11.406	-0.914838	-1.21063	0.0372	0.191129	no
XLOC_008982	XLOC_008982	Use1	3L:9134559-9137181	Wild Type	ZnF2 Mutant	OK	23.2572	10.8655	-1.09792	-1.2497	0.0374	0.191996	no
XLOC_009710	XLOC_009710	CG42637,Gyc76C	3L:19719526-19793569	Wild Type	ZnF2 Mutant	OK	1.35264	0.457371	-1.56434	-1.32741	0.03745	0.191996	no
XLOC_000822	XLOC_000822	KdelR	2L:10426886-10428632	Wild Type	ZnF2 Mutant	OK	165.728	115.009	-0.527066	-1.21318	0.03745	0.191996	no
XLOC_012461	XLOC_012461	PGRP-LB	3R:11437546-11467372	Wild Type	ZnF2 Mutant	OK	0.445207	0.0403178	-3.46499	-0.370205	0.03755	0.192208	no
XLOC_005295	XLOC_005295	alc	2R:9132479-9137933	Wild Type	ZnF2 Mutant	OK	38.7242	16.3422	-1.24463	-1.27121	0.03755	0.192208	no
XLOC_013636	XLOC_013636	fkh	3R:28580975-28585264	Wild Type	ZnF2 Mutant	OK	17.1385	25.8639	0.5937	1.18456	0.0376	0.192208	no
XLOC_013595	XLOC_013595	tau	3R:27639885-27656996	Wild Type	ZnF2 Mutant	OK	0.0111374	0.399532	5.16483	0.427389	0.0376	0.192208	no
XLOC_009413	XLOC_009413	fwe	3L:15810080-15816410	Wild Type	ZnF2 Mutant	OK	117.674	80.3833	-0.549832	-1.19679	0.03765	0.192325	no
XLOC_005818	XLOC_005818	Pex11	2R:15991366-15992375	Wild Type	ZnF2 Mutant	OK	1.06569	5.02487	2.23729	1.38171	0.0377	0.192441	no
XLOC_010605	XLOC_010605	Paip2	3R:12980791-12985488	Wild Type	ZnF2 Mutant	OK	114.543	75.3354	-0.604495	-1.15984	0.03775	0.192558	no
XLOC_010821	XLOC_010821	asun	3R:16264270-16266891	Wild Type	ZnF2 Mutant	OK	32.914	21.3099	-0.627176	-1.19005	0.0378	0.192674	no
XLOC_008302	XLOC_008302	AGO3	3L:23554592-23689640	Wild Type	ZnF2 Mutant	OK	86.5574	61.2373	-0.499246	-1.18968	0.038	0.193554	no
XLOC_004280	XLOC_004280	CG34194,CG43370	2R:17539321-17545045	Wild Type	ZnF2 Mutant	OK	2.57682	9.70292	1.91283	1.09037	0.03815	0.194178	no
XLOC_012258	XLOC_012258	CG9773	3R:8675282-8676613	Wild Type	ZnF2 Mutant	OK	44.1609	26.3649	-0.744148	-1.18703	0.03835	0.19503	no
XLOC_008235	XLOC_008235	Aats-ile	3L:22288664-22292810	Wild Type	ZnF2 Mutant	OK	138.317	103.132	-0.423487	-1.17939	0.0384	0.19503	no
XLOC_009446	XLOC_009446	l(3)72Dn	3L:16226125-16228737	Wild Type	ZnF2 Mutant	OK	5.24911	9.7023	0.886255	1.17725	0.0384	0.19503	no
XLOC_005190	XLOC_005190	Sep5	2R:7960132-7961921	Wild Type	ZnF2 Mutant	OK	600.194	783.915	0.385269	1.1832	0.03855	0.195652	no
XLOC_002933	XLOC_002933	CG6453	2L:17481230-17484307	Wild Type	ZnF2 Mutant	OK	89.5426	60.6313	-0.56251	-1.20322	0.0386	0.195765	no
XLOC_000100	XLOC_000100	CG4887	2L:1173008-1177589	Wild Type	ZnF2 Mutant	OK	41.1369	28.2158	-0.543927	-1.18753	0.0387	0.195851	no
XLOC_009020	XLOC_009020	fry	3L:9631833-9679103	Wild Type	ZnF2 Mutant	OK	26.0255	18.717	-0.475582	-1.19414	0.0387	0.195851	no
XLOC_006230	XLOC_006230	CG11208	2R:20239935-20245388	Wild Type	ZnF2 Mutant	OK	33.5762	51.978	0.630462	1.2017	0.0387	0.195851	no
XLOC_012350	XLOC_012350	FBXO11	3R:9803485-9809368	Wild Type	ZnF2 Mutant	OK	5.04905	8.59166	0.766925	1.20812	0.039	0.197229	no
XLOC_006544	XLOC_006544	CG30183	2R:23688076-23697824	Wild Type	ZnF2 Mutant	OK	2.2457	4.99932	1.15457	1.2006	0.0391	0.197593	no
XLOC_013785	XLOC_013785	CG2224	3R:30456440-30459300	Wild Type	ZnF2 Mutant	OK	42.6181	27.1591	-0.65003	-1.18038	0.0393	0.19829	no
XLOC_005383	XLOC_005383	JhI-1	2R:10307029-10309794	Wild Type	ZnF2 Mutant	OK	4.46674	8.79325	0.977173	1.22117	0.0393	0.19829	no
XLOC_010072	XLOC_010072	CG1236	3R:5736747-5738013	Wild Type	ZnF2 Mutant	OK	98.1175	66.0598	-0.570738	-1.17145	0.03935	0.19829	no
XLOC_009485	XLOC_009485	nxf2	3L:16574435-16580306	Wild Type	ZnF2 Mutant	OK	76.7923	52.2227	-0.556283	-1.20762	0.03935	0.19829	no
XLOC_012621	XLOC_012621	Rbp4	3R:13654555-13656394	Wild Type	ZnF2 Mutant	OK	0.670596	3.03897	2.18007	1.405	0.0395	0.198905	no
XLOC_007023	XLOC_007023	CG11357	3L:4542050-4553457	Wild Type	ZnF2 Mutant	OK	85.1015	59.8856	-0.506976	-1.1719	0.03955	0.199015	no
XLOC_002286	XLOC_002286	CG12560	2L:8008301-8009477	Wild Type	ZnF2 Mutant	OK	19.7893	0.93334	-4.40617	-2.90763	0.0397	0.199486	no
XLOC_007088	XLOC_007088	Vap-33B	3L:5923861-5930120	Wild Type	ZnF2 Mutant	OK	34.7626	21.4079	-0.699394	-1.20145	0.0397	0.199486	no
XLOC_010813	XLOC_010813	sra	3R:16181019-16197584	Wild Type	ZnF2 Mutant	OK	79.9403	33.4477	-1.25702	-1.31728	0.03975	0.199596	no
XLOC_007639	XLOC_007639	CG43184	3L:13837755-13838080	Wild Type	ZnF2 Mutant	OK	752.009	1061.36	0.497088	1.17217	0.0399	0.200033	no
XLOC_001809	XLOC_001809	erm	2L:1950238-1970362	Wild Type	ZnF2 Mutant	OK	0.357118	1.42116	1.9926	1.26442	0.0399	0.200033	no
XLOC_011526	XLOC_011526	CG5913	3R:25893494-25895026	Wild Type	ZnF2 Mutant	OK	16.4469	9.2458	-0.830949	-1.15826	0.03995	0.200033	no
XLOC_004782	XLOC_004782	CG9849	2R:22937278-22941169	Wild Type	ZnF2 Mutant	OK	80.8951	50.3418	-0.684298	-1.18095	0.03995	0.200033	no
XLOC_001867	XLOC_001867	Slh	2L:2488196-2492671	Wild Type	ZnF2 Mutant	OK	5.01297	9.52737	0.926412	1.19407	0.0401	0.200642	no
XLOC_002309	XLOC_002309	Pvr	2L:8220979-8239878	Wild Type	ZnF2 Mutant	OK	0.779254	1.78475	1.19556	1.17331	0.0402	0.201	no
XLOC_010161	XLOC_010161	CR45899	3R:7000491-7001423	Wild Type	ZnF2 Mutant	OK	0.906278	3.6319	2.0027	1.33924	0.0403	0.201358	no
XLOC_008393	XLOC_008393	hng3	3L:737679-755489	Wild Type	ZnF2 Mutant	OK	3.98707	35.5792	3.15763	1.71751	0.04045	0.201965	no
XLOC_010235	XLOC_010235	unc-45	3R:8033300-8036652	Wild Type	ZnF2 Mutant	OK	0.403925	1.75537	2.11961	1.38184	0.04055	0.202321	no
XLOC_003689	XLOC_003689	Hdc	2R:10237743-10247560	Wild Type	ZnF2 Mutant	OK	0.478314	2.02307	2.08052	1.31288	0.04065	0.202677	no
XLOC_005516	XLOC_005516	Mppe	2R:12025613-12027707	Wild Type	ZnF2 Mutant	OK	60.8202	40.6121	-0.58264	-1.18705	0.04075	0.203033	no
XLOC_011883	XLOC_011883	Gcn2	3R:31395659-31457873	Wild Type	ZnF2 Mutant	OK	35.8225	22.5745	-0.666172	-1.20283	0.04085	0.203388	no
XLOC_010329	XLOC_010329	VhaM8.9	3R:9260637-9262590	Wild Type	ZnF2 Mutant	OK	79.6354	53.6895	-0.568769	-1.17669	0.0409	0.203494	no
XLOC_010764	XLOC_010764	CG5205	3R:15486049-15493310	Wild Type	ZnF2 Mutant	OK	5.84901	3.46938	-0.753516	-1.19804	0.04095	0.2036	no
XLOC_000144	XLOC_000144	CG7289	2L:1982216-1987758	Wild Type	ZnF2 Mutant	OK	1.49867	4.04314	1.43179	1.21831	0.041	0.203705	no
XLOC_006460	XLOC_006460	CG13531	2R:22845976-22853827	Wild Type	ZnF2 Mutant	OK	2.2367	4.03209	0.850159	1.18583	0.04115	0.204307	no
XLOC_002563	XLOC_002563	CG6488	2L:11496803-11498948	Wild Type	ZnF2 Mutant	OK	2.54953	5.95734	1.22443	1.23154	0.04125	0.20466	no
XLOC_013245	XLOC_013245	Rassf	3R:23114013-23117931	Wild Type	ZnF2 Mutant	OK	92.1693	66.7972	-0.4645	-1.17724	0.0414	0.205261	no
XLOC_005733	XLOC_005733	CG12857,Spred	2R:14757906-14769423	Wild Type	ZnF2 Mutant	OK	12.4213	6.94376	-0.839028	-1.20617	0.04145	0.205365	no
XLOC_009742	XLOC_009742	CG7328	3L:20139209-20140607	Wild Type	ZnF2 Mutant	OK	13.1798	6.68953	-0.978356	-1.17531	0.04155	0.205716	no
XLOC_009768	XLOC_009768	trbl	3L:20396287-20401609	Wild Type	ZnF2 Mutant	OK	242.068	321.032	0.407304	1.18293	0.04175	0.206418	no
XLOC_004231	XLOC_004231	Dark	2R:17020026-17026993	Wild Type	ZnF2 Mutant	OK	11.5013	17.791	0.629347	1.17898	0.04175	0.206418	no
XLOC_010500	XLOC_010500	Elp1	3R:11650970-11655691	Wild Type	ZnF2 Mutant	OK	15.5472	9.94401	-0.644758	-1.1999	0.0419	0.207015	no
XLOC_010286	XLOC_010286	CG8032	3R:8664114-8667772	Wild Type	ZnF2 Mutant	OK	2.78878	5.70533	1.03268	1.21576	0.042	0.207364	no
XLOC_005300	XLOC_005300	Rme-8	2R:9167762-9177261	Wild Type	ZnF2 Mutant	OK	35.8824	25.927	-0.468818	-1.17377	0.04205	0.207466	no
XLOC_005414	XLOC_005414	CG33144	2R:10740053-10798709	Wild Type	ZnF2 Mutant	OK	1.70002	0.525395	-1.69408	-1.31565	0.04215	0.207815	no
XLOC_003667	XLOC_003667	Adam	2R:9968928-9970897	Wild Type	ZnF2 Mutant	OK	15.3863	27.4643	0.835916	1.18665	0.0422	0.207916	no
XLOC_009712	XLOC_009712	CG14102	3L:19793934-19803427	Wild Type	ZnF2 Mutant	OK	12.417	5.7265	-1.11659	-1.26194	0.04235	0.208322	no
XLOC_013691	XLOC_013691	CG31041	3R:29590069-29590906	Wild Type	ZnF2 Mutant	OK	0.914222	3.52786	1.94818	1.20733	0.0424	0.208322	no
XLOC_002155	XLOC_002155	CG42368	2L:6377770-6411326	Wild Type	ZnF2 Mutant	OK	0.240534	1.00944	2.06925	1.20098	0.0424	0.208322	no
XLOC_004962	XLOC_004962	Dll	2R:24814821-24835667	Wild Type	ZnF2 Mutant	OK	0.484747	2.05473	2.08364	1.20624	0.0424	0.208322	no
XLOC_006517	XLOC_006517	CG3530	2R:23386520-23396680	Wild Type	ZnF2 Mutant	OK	20.2968	11.0109	-0.882317	-1.21652	0.0431	0.211614	no
XLOC_005187	XLOC_005187	CG30380	2R:7939200-7939659	Wild Type	ZnF2 Mutant	OK	0.390538	2.41997	2.63145	1.25478	0.04315	0.211713	no
XLOC_008621	XLOC_008621	Chd64	3L:4114288-4122388	Wild Type	ZnF2 Mutant	OK	176.99	127.302	-0.475411	-1.15999	0.0432	0.211812	no
XLOC_006920	XLOC_006920	CG43389	3L:3248014-3249044	Wild Type	ZnF2 Mutant	OK	0.509725	0	-inf	-nan	0.04325	0.21191	no
XLOC_009901	XLOC_009901	CG11523	3L:22263368-22266679	Wild Type	ZnF2 Mutant	OK	203.427	136.241	-0.57835	-1.17607	0.04345	0.212547	no
XLOC_013382	XLOC_013382	CG5807	3R:24805444-24814012	Wild Type	ZnF2 Mutant	OK	25.1068	15.8884	-0.6601	-1.15115	0.0435	0.212547	no
XLOC_004269	XLOC_004269	CG14478	2R:17457662-17465795	Wild Type	ZnF2 Mutant	OK	172.561	128.731	-0.422751	-1.17899	0.0435	0.212547	no
XLOC_005442	XLOC_005442	CG34224	2R:11237171-11237644	Wild Type	ZnF2 Mutant	OK	68.9265	115.042	0.739028	1.14469	0.0435	0.212547	no
XLOC_003977	XLOC_003977	CG6357	2R:13840052-13841743	Wild Type	ZnF2 Mutant	OK	19.0025	10.7965	-0.815623	-1.16224	0.0437	0.213229	no
XLOC_002312	XLOC_002312	CG8086	2L:8244159-8257502	Wild Type	ZnF2 Mutant	OK	0.0670883	0.600498	3.16202	1.14919	0.0437	0.213229	no
XLOC_009701	XLOC_009701	wnd	3L:19624405-19635783	Wild Type	ZnF2 Mutant	OK	13.1637	7.98116	-0.721893	-1.18294	0.0438	0.21357	no
XLOC_001163	XLOC_001163	esg	2L:15333865-15336138	Wild Type	ZnF2 Mutant	OK	13.3394	7.51552	-0.827751	-1.18943	0.0439	0.213911	no
XLOC_004833	XLOC_004833	l(2)dtl	2R:23702476-23705403	Wild Type	ZnF2 Mutant	OK	19.1071	29.2927	0.616431	1.15774	0.04395	0.214007	no
XLOC_003792	XLOC_003792	Sln	2R:11845323-11852324	Wild Type	ZnF2 Mutant	OK	0.141778	0.539691	1.9285	1.16559	0.044	0.214103	no
XLOC_011309	XLOC_011309	GILT2	3R:23678894-23679855	Wild Type	ZnF2 Mutant	OK	187.59	127.003	-0.562721	-1.16403	0.04415	0.214685	no
XLOC_003596	XLOC_003596	CG44286,CG8788	2R:9138485-9141981	Wild Type	ZnF2 Mutant	OK	77.6796	51.8787	-0.582392	-1.15456	0.0442	0.214781	no
XLOC_009537	XLOC_009537	Mip	3L:17344946-17349666	Wild Type	ZnF2 Mutant	OK	1.14867	0.321391	-1.83756	-1.06266	0.04425	0.214877	no
XLOC_003632	XLOC_003632	GstT1	2R:9605987-9607184	Wild Type	ZnF2 Mutant	OK	162.079	112.366	-0.528496	-1.15527	0.0443	0.214972	no
XLOC_004896	XLOC_004896	spag	2R:24159383-24161503	Wild Type	ZnF2 Mutant	OK	22.6218	13.6216	-0.73182	-1.14673	0.0446	0.216279	no
XLOC_013784	XLOC_013784	aralar1	3R:30445634-30455867	Wild Type	ZnF2 Mutant	OK	1.86858	0.686698	-1.44419	-1.14379	0.04475	0.216858	no
XLOC_013852	XLOC_013852	pygo	3R:31575834-31580699	Wild Type	ZnF2 Mutant	OK	131.577	98.8931	-0.411965	-1.1524	0.04485	0.21703	no
XLOC_009376	XLOC_009376	Pdi	3L:15137737-15142840	Wild Type	ZnF2 Mutant	OK	859.057	673.944	-0.350126	-1.15765	0.04485	0.21703	no
XLOC_009819	XLOC_009819	skd	3L:20991672-21027434	Wild Type	ZnF2 Mutant	OK	12.9588	18.3876	0.50481	1.16979	0.04495	0.21703	no
XLOC_005601	XLOC_005601	Psc	2R:12965996-12980994	Wild Type	ZnF2 Mutant	OK	20.8246	29.7955	0.516805	1.15625	0.04495	0.21703	no
XLOC_007012	XLOC_007012	DOR	3L:4406942-4420648	Wild Type	ZnF2 Mutant	OK	11.4696	5.7786	-0.989029	-1.15572	0.045	0.21703	no
XLOC_009700	XLOC_009700	l(3)76BDm	3L:19612454-19618521	Wild Type	ZnF2 Mutant	OK	10.6187	16.5771	0.642593	1.1715	0.045	0.21703	no
XLOC_000556	XLOC_000556	wg	2L:7307158-7316265	Wild Type	ZnF2 Mutant	OK	4.08075	7.6858	0.913361	1.16254	0.045	0.21703	no
XLOC_003964	XLOC_003964	fand	2R:13593643-13596557	Wild Type	ZnF2 Mutant	OK	32.0681	46.5503	0.537652	1.12895	0.04525	0.217939	no
XLOC_005819	XLOC_005819	ATPCL	2R:15992407-16007667	Wild Type	ZnF2 Mutant	OK	9.10008	23.4292	1.36436	1.26211	0.04525	0.217939	no
XLOC_002308	XLOC_002308	Snx6	2L:8218070-8220741	Wild Type	ZnF2 Mutant	OK	153.844	111.211	-0.468163	-1.16091	0.0454	0.218513	no
XLOC_003740	XLOC_003740	Syx6	2R:11217415-11222480	Wild Type	ZnF2 Mutant	OK	35.9048	21.8667	-0.715442	-1.1701	0.0458	0.220288	no
XLOC_006990	XLOC_006990	Ero1L	3L:4170403-4173789	Wild Type	ZnF2 Mutant	OK	2.87539	6.07371	1.07882	1.17791	0.04585	0.22032	no
XLOC_001466	XLOC_001466	Arpc2	2L:20417056-20423027	Wild Type	ZnF2 Mutant	OK	280.364	211.19	-0.408763	-1.14243	0.0459	0.22032	no
XLOC_004238	XLOC_004238	CG6984	2R:17091983-17093070	Wild Type	ZnF2 Mutant	OK	3.34805	7.52354	1.16809	1.14606	0.0459	0.22032	no
XLOC_010442	XLOC_010442	CG4511	3R:10854500-10856412	Wild Type	ZnF2 Mutant	OK	44.7813	28.6229	-0.645727	-1.165	0.046	0.220591	no
XLOC_000367	XLOC_000367	Mon1	2L:4850640-4852640	Wild Type	ZnF2 Mutant	OK	85.4116	60.0989	-0.507094	-1.12999	0.04605	0.220591	no
XLOC_005049	XLOC_005049	EcR	2R:6087872-6169087	Wild Type	ZnF2 Mutant	OK	49.0274	34.6489	-0.500778	-1.14367	0.04605	0.220591	no
XLOC_013879	XLOC_013879	krz	3R:32045313-32051993	Wild Type	ZnF2 Mutant	OK	146.134	105.934	-0.464132	-1.13428	0.04615	0.220921	no
XLOC_010055	XLOC_010055	Vha26	3R:5591762-5595356	Wild Type	ZnF2 Mutant	OK	316.966	242.609	-0.385698	-1.12331	0.0463	0.221489	no
XLOC_012902	XLOC_012902	alt	3R:17671270-17682515	Wild Type	ZnF2 Mutant	OK	150.211	112.035	-0.423048	-1.15636	0.0465	0.222146	no
XLOC_013855	XLOC_013855	CycG	3R:31596641-31616160	Wild Type	ZnF2 Mutant	OK	530.454	404.369	-0.391555	-1.1345	0.0465	0.222146	no
XLOC_003147	XLOC_003147	Cen	2L:20676044-20681846	Wild Type	ZnF2 Mutant	OK	253.531	189.91	-0.416844	-1.1551	0.0467	0.22265	no
XLOC_001457	XLOC_001457	neb	2L:20075756-20091348	Wild Type	ZnF2 Mutant	OK	19.0166	31.0387	0.706811	1.19148	0.0467	0.22265	no
XLOC_003461	XLOC_003461	CG12107	2R:7674449-7676362	Wild Type	ZnF2 Mutant	OK	8.29437	20.761	1.32368	1.10489	0.0467	0.222651	no
XLOC_004142	XLOC_004142	lbk	2R:16150122-16169519	Wild Type	ZnF2 Mutant	OK	4.26769	7.00465	0.714859	1.11831	0.04675	0.222739	no
XLOC_006079	XLOC_006079	cer	2R:19396214-19396849	Wild Type	ZnF2 Mutant	OK	66.2871	107.16	0.692969	1.12963	0.0469	0.223303	no
XLOC_008176	XLOC_008176	CG7611	3L:21523185-21528163	Wild Type	ZnF2 Mutant	OK	208.698	274.295	0.394313	1.15657	0.04705	0.223717	no
XLOC_000444	XLOC_000444	CG7239	2L:5802219-5804030	Wild Type	ZnF2 Mutant	OK	20.5288	32.8567	0.678538	1.15523	0.04705	0.223717	no
XLOC_007822	XLOC_007822	CG4933	3L:16351990-16354297	Wild Type	ZnF2 Mutant	OK	2.57603	6.47385	1.32948	1.17936	0.0471	0.223804	no
XLOC_001838	XLOC_001838	Sec24CD	2L:2231105-2237022	Wild Type	ZnF2 Mutant	OK	12.1494	7.60421	-0.676012	-1.17851	0.04715	0.223891	no
XLOC_002858	XLOC_002858	CG13258	2L:16292009-16293025	Wild Type	ZnF2 Mutant	OK	0.675306	2.46755	1.86947	1.12365	0.0472	0.223979	no
XLOC_000161	XLOC_000161	CG7261	2L:2147517-2151664	Wild Type	ZnF2 Mutant	OK	9.70188	15.2169	0.649339	1.13685	0.0473	0.224303	no
XLOC_011444	XLOC_011444	CG11790	3R:25047705-25049455	Wild Type	ZnF2 Mutant	OK	77.1926	50.6095	-0.609055	-1.1364	0.0474	0.224627	no
XLOC_004282	XLOC_004282	MESR4	2R:17547768-17556289	Wild Type	ZnF2 Mutant	OK	32.8317	44.6201	0.442604	1.14244	0.04755	0.225187	no
XLOC_005401	XLOC_005401	Caf1-105	2R:10466000-10468540	Wild Type	ZnF2 Mutant	OK	82.8723	115.12	0.47418	1.1577	0.04765	0.225445	no
XLOC_010576	XLOC_010576	CG18549	3R:12449295-12456355	Wild Type	ZnF2 Mutant	OK	6.55322	11.7348	0.840514	1.14534	0.0477	0.225445	no
XLOC_002208	XLOC_002208	snoRNA:nop5-x16-a	2L:6914300-6920210	Wild Type	ZnF2 Mutant	OK	0	14.3152	inf	-nan	0.0477	0.225445	no
XLOC_012513	XLOC_012513	CG4860	3R:12219880-12221630	Wild Type	ZnF2 Mutant	OK	16.666	9.49782	-0.811237	-1.11996	0.04785	0.225852	no
XLOC_013604	XLOC_013604	CG5003	3R:27912446-27916516	Wild Type	ZnF2 Mutant	OK	104.029	75.4986	-0.462457	-1.12397	0.04785	0.225852	no
XLOC_005398	XLOC_005398	CG12896	2R:10426879-10427915	Wild Type	ZnF2 Mutant	OK	3.20191	8.88344	1.47219	1.22346	0.0479	0.225937	no
XLOC_007893	XLOC_007893	CG18265	3L:17439400-17457461	Wild Type	ZnF2 Mutant	OK	1.10282	0.0298737	-5.20618	-2.77549	0.04825	0.22737	no
XLOC_011736	XLOC_011736	Pglym78	3R:29148247-29151794	Wild Type	ZnF2 Mutant	OK	86.2525	41.3294	-1.0614	-1.25627	0.0483	0.22737	no
XLOC_012220	XLOC_012220	Ada2b	3R:8233227-8240515	Wild Type	ZnF2 Mutant	OK	81.8422	52.5311	-0.639672	-1.17106	0.0483	0.22737	no
XLOC_001518	XLOC_001518	CG9328	2L:20797714-20814331	Wild Type	ZnF2 Mutant	OK	139.659	100.109	-0.480339	-1.13327	0.0484	0.227689	no
XLOC_010351	XLOC_010351	Vps45	3R:9563923-9566092	Wild Type	ZnF2 Mutant	OK	1.26683	3.52274	1.47547	1.22383	0.0486	0.228478	no
XLOC_003543	XLOC_003543	CG14749	2R:8627899-8630186	Wild Type	ZnF2 Mutant	OK	116.608	84.8796	-0.458183	-1.11148	0.0488	0.229114	no
XLOC_011729	XLOC_011729	CG11873	3R:29063039-29108948	Wild Type	ZnF2 Mutant	OK	11.3872	16.2215	0.510495	1.13578	0.0488	0.229114	no
XLOC_011604	XLOC_011604	CG14253	3R:26978540-26988517	Wild Type	ZnF2 Mutant	OK	0.0575824	1.72215	4.90244	1.57284	0.04925	0.231074	no
XLOC_009294	XLOC_009294	CG10089	3L:13465551-13474787	Wild Type	ZnF2 Mutant	OK	2.12053	0.12583	-4.07488	-1.81392	0.0493	0.231155	no
XLOC_008586	XLOC_008586	ImpE2	3L:3510973-3512681	Wild Type	ZnF2 Mutant	OK	9.39056	16.7893	0.838261	1.13023	0.0494	0.231471	no
XLOC_004618	XLOC_004618	ktub	2R:21101927-21123704	Wild Type	ZnF2 Mutant	OK	3.1987	7.13262	1.15695	1.27447	0.04945	0.231552	no
XLOC_008741	XLOC_008741	vn	3L:5813337-5845664	Wild Type	ZnF2 Mutant	OK	1.42848	2.8966	1.01988	1.20882	0.04965	0.232334	no
XLOC_012604	XLOC_012604	yellow-e3	3R:13403422-13404870	Wild Type	ZnF2 Mutant	OK	19.6944	10.7404	-0.874734	-1.15606	0.0497	0.232415	no
XLOC_008605	XLOC_008605	Eip63F-1,mge	3L:3907851-3935992	Wild Type	ZnF2 Mutant	OK	13.1014	6.33095	-1.04923	-1.14618	0.04975	0.232495	no
XLOC_008155	XLOC_008155	CG43702	3L:21298674-21299063	Wild Type	ZnF2 Mutant	OK	0	0.843076	inf	-nan	0.0498	0.232575	no
XLOC_002313	XLOC_002313	Btk29A,mir-2b-1	2L:8258372-8301079	Wild Type	ZnF2 Mutant	OK	208.29	159.613	-0.384015	-1.10967	0.0499	0.232735	no
XLOC_012778	XLOC_012778	Hmt-1	3R:15853867-15857470	Wild Type	ZnF2 Mutant	OK	3.04444	5.95082	0.966912	1.14993	0.0499	0.232735	no
XLOC_012126	XLOC_012126	CG1105	3R:7062174-7067136	Wild Type	ZnF2 Mutant	OK	21.6444	13.2003	-0.713421	-1.11105	0.05	0.233048	no
XLOC_009832	XLOC_009832	CG9391	3L:21266679-21268335	Wild Type	ZnF2 Mutant	OK	12.3541	6.30807	-0.969713	-1.09641	0.0501	0.233207	no
XLOC_011659	XLOC_011659	CG12877	3R:27707099-27710857	Wild Type	ZnF2 Mutant	OK	86.5041	63.2968	-0.450636	-1.12543	0.0501	0.233207	no
XLOC_007315	XLOC_007315	CG32039	3L:9358998-9359996	Wild Type	ZnF2 Mutant	OK	34.098	18.0125	-0.920688	-1.17288	0.05015	0.233286	no
XLOC_007419	XLOC_007419	CG7949	3L:10882889-10883573	Wild Type	ZnF2 Mutant	OK	42.8763	24.8826	-0.785043	-1.07856	0.05025	0.233598	no
XLOC_009491	XLOC_009491	CR18217	3L:16595180-16602723	Wild Type	ZnF2 Mutant	OK	0.713721	4.33127	2.60136	1.3727	0.0505	0.234606	no
XLOC_000295	XLOC_000295	Shaw	2L:3718184-3729145	Wild Type	ZnF2 Mutant	OK	0.0474828	2.30303	5.59998	2.36074	0.0507	0.235381	no
XLOC_006097	XLOC_006097	CR44504	2R:19659644-19661847	Wild Type	ZnF2 Mutant	OK	8.53029	14.3822	0.753614	1.11669	0.0508	0.235691	no
XLOC_013629	XLOC_013629	larp	3R:28318161-28336440	Wild Type	ZnF2 Mutant	OK	18.0912	25.6248	0.502255	1.13013	0.05095	0.236077	no
XLOC_010882	XLOC_010882	CG31265,CG31269	3R:17126983-17129120	Wild Type	ZnF2 Mutant	OK	0.855335	0	-inf	-nan	0.05095	0.236077	no
XLOC_009472	XLOC_009472	Cpr72Ec	3L:16365893-16367340	Wild Type	ZnF2 Mutant	OK	0.469035	1.73595	1.88796	1.19699	0.051	0.236154	no
XLOC_013413	XLOC_013413	CG31108,CG31510	3R:25112866-25122920	Wild Type	ZnF2 Mutant	OK	139.23	104.399	-0.415373	-1.12307	0.0511	0.236463	no
XLOC_008515	XLOC_008515	CG1317	3L:2367842-2371939	Wild Type	ZnF2 Mutant	OK	24.1866	16.1064	-0.586571	-1.11646	0.0512	0.236771	no
XLOC_002053	XLOC_002053	vkg	2L:5012143-5028191	Wild Type	ZnF2 Mutant	OK	0.707507	0.0539634	-3.71269	-2.19162	0.0513	0.237078	no
XLOC_002542	XLOC_002542	Reps	2L:11100962-11106645	Wild Type	ZnF2 Mutant	OK	16.5248	10.93	-0.596347	-1.13523	0.0514	0.237386	no
XLOC_000163	XLOC_000163	CG15382	2L:2155752-2178754	Wild Type	ZnF2 Mutant	OK	479.228	332.632	-0.526785	-1.14468	0.05145	0.237462	no
XLOC_013580	XLOC_013580	side	3R:27375087-27437482	Wild Type	ZnF2 Mutant	OK	0.113727	0.660913	2.53888	1.29112	0.05155	0.237768	no
XLOC_010182	XLOC_010182	Sas-4	3R:7151366-7154219	Wild Type	ZnF2 Mutant	OK	3.39459	6.53075	0.944011	1.15185	0.0516	0.237844	no
XLOC_005612	XLOC_005612	CG17724,Kdm4B,seq	2R:13176093-13198337	Wild Type	ZnF2 Mutant	OK	70.414	49.3455	-0.512945	-1.13627	0.0517	0.23815	no
XLOC_003810	XLOC_003810	128up	2R:12037297-12038851	Wild Type	ZnF2 Mutant	OK	49.6549	31.9368	-0.636715	-1.13659	0.0519	0.238835	no
XLOC_012385	XLOC_012385	Rfx	3R:10361759-10378068	Wild Type	ZnF2 Mutant	OK	1.72294	0.667205	-1.36867	-1.21209	0.05195	0.238835	no
XLOC_006052	XLOC_006052	CG15100	2R:18846857-18850599	Wild Type	ZnF2 Mutant	OK	0.747909	1.68221	1.16942	1.07007	0.05195	0.238835	no
XLOC_009781	XLOC_009781	mTerf3	3L:20519589-20520772	Wild Type	ZnF2 Mutant	OK	7.1617	3.2358	-1.14618	-1.12292	0.052	0.23891	no
XLOC_002105	XLOC_002105	CG14005	2L:5800516-5801975	Wild Type	ZnF2 Mutant	OK	107.525	75.8457	-0.503534	-1.09606	0.0522	0.239673	no
XLOC_008099	XLOC_008099	CG32425	3L:20497322-20514107	Wild Type	ZnF2 Mutant	OK	116.871	84.6449	-0.465429	-1.1029	0.05235	0.240051	no
XLOC_002885	XLOC_002885	CR43670	2L:16700939-16703197	Wild Type	ZnF2 Mutant	OK	4.0489	7.64489	0.916967	1.11627	0.05235	0.240051	no
XLOC_000008	XLOC_000008	CG11377	2L:102379-106732	Wild Type	ZnF2 Mutant	OK	6.81383	14.6598	1.10533	1.20292	0.05255	0.240812	no
XLOC_009099	XLOC_009099	Ufd1-like	3L:11120846-11123216	Wild Type	ZnF2 Mutant	OK	6.27578	16.3604	1.38234	1.1779	0.0527	0.241343	no
XLOC_010804	XLOC_010804	CG5013	3R:16049669-16050693	Wild Type	ZnF2 Mutant	OK	27.926	45.7292	0.711506	1.134	0.05275	0.241416	no
XLOC_003983	XLOC_003983	CG42806,Cp1	2R:13960674-13967981	Wild Type	ZnF2 Mutant	OK	306.938	228.148	-0.427979	-1.10359	0.0528	0.241488	no
XLOC_003386	XLOC_003386	phtf	2R:6741898-6746141	Wild Type	ZnF2 Mutant	OK	56.6136	40.8105	-0.472206	-1.09156	0.05285	0.241561	no
XLOC_005831	XLOC_005831	CG10731	2R:16148811-16149795	Wild Type	ZnF2 Mutant	OK	17.9575	8.98178	-0.999512	-1.14517	0.0531	0.242547	no
XLOC_001740	XLOC_001740	CG3876	2L:815992-819508	Wild Type	ZnF2 Mutant	OK	26.8848	15.8747	-0.760062	-1.12031	0.0533	0.243147	no
XLOC_005130	XLOC_005130	Eaf,mir-4977	2R:7396849-7407819	Wild Type	ZnF2 Mutant	OK	76.9532	50.0352	-0.621037	-0.483214	0.0533	0.243147	no
XLOC_011329	XLOC_011329	CG31141	3R:23923299-23924319	Wild Type	ZnF2 Mutant	OK	1.10031	4.55938	2.05093	1.26073	0.05335	0.243218	no
XLOC_011028	XLOC_011028	CG3773	3R:19229462-19246130	Wild Type	ZnF2 Mutant	OK	1.88305	7.06055	1.90671	1.18169	0.0536	0.244201	no
XLOC_008359	XLOC_008359	fwd	3L:305392-319884	Wild Type	ZnF2 Mutant	OK	63.6516	46.9236	-0.439884	-1.10447	0.05375	0.244483	no
XLOC_001500	XLOC_001500	CG2608	2L:20645821-20647381	Wild Type	ZnF2 Mutant	OK	31.7074	20.1742	-0.652306	-1.06057	0.0538	0.244483	no
XLOC_002495	XLOC_002495	CG7299	2L:10683426-10684409	Wild Type	ZnF2 Mutant	OK	0.830739	0	-inf	-nan	0.0538	0.244483	no
XLOC_003411	XLOC_003411	Tsp42Eg	2R:7028910-7033233	Wild Type	ZnF2 Mutant	OK	0.671064	0	-inf	-nan	0.0538	0.244483	no
XLOC_009361	XLOC_009361	CG12310,CG18581,CG43679	3L:15014694-15064977	Wild Type	ZnF2 Mutant	OK	4.05623	0	-inf	-nan	0.0539	0.244693	no
XLOC_011617	XLOC_011617	CG5880	3R:27116744-27118532	Wild Type	ZnF2 Mutant	OK	48.3469	32.1488	-0.588657	-1.0977	0.05395	0.244693	no
XLOC_000043	XLOC_000043	CG4164	2L:453107-454654	Wild Type	ZnF2 Mutant	OK	144.275	103.873	-0.473999	-1.11361	0.05395	0.244693	no
XLOC_001544	XLOC_001544	Acon,CG31627	2L:21163640-21174179	Wild Type	ZnF2 Mutant	OK	357.845	261.794	-0.450903	-1.11009	0.054	0.244763	no
XLOC_005583	XLOC_005583	Taz	2R:12753025-12756414	Wild Type	ZnF2 Mutant	OK	19.1283	10.9756	-0.801412	-1.12436	0.05405	0.244833	no
XLOC_005218	XLOC_005218	dpn	2R:8228970-8232330	Wild Type	ZnF2 Mutant	OK	61.1629	38.2528	-0.677093	-1.1275	0.0542	0.244869	no
XLOC_010073	XLOC_010073	Madm	3R:5742509-5746862	Wild Type	ZnF2 Mutant	OK	15.7992	23.3917	0.566146	1.0897	0.0542	0.244869	no
XLOC_008913	XLOC_008913	RecQ4	3L:8170639-8175978	Wild Type	ZnF2 Mutant	OK	3.47535	5.81192	0.741858	1.10407	0.0542	0.244869	no
XLOC_001943	XLOC_001943	mir-4971,msl-2	2L:3462217-3466112	Wild Type	ZnF2 Mutant	OK	43.314	111.849	1.36864	0.606947	0.05425	0.244869	no
XLOC_005982	XLOC_005982	Ubc10	2R:17786134-17789410	Wild Type	ZnF2 Mutant	OK	169.611	119.282	-0.50785	-1.10714	0.0543	0.244869	no
XLOC_010943	XLOC_010943	CG14321	3R:17733597-17734381	Wild Type	ZnF2 Mutant	OK	4.04669	10.4032	1.36221	1.15998	0.0543	0.244869	no
XLOC_001716	XLOC_001716	CG4213	2L:396594-402198	Wild Type	ZnF2 Mutant	OK	0.217905	0.76201	1.80611	1.19687	0.0543	0.244869	no
XLOC_001777	XLOC_001777	CG18131	2L:1497242-1500608	Wild Type	ZnF2 Mutant	OK	1.79166	0.122137	-3.87473	-1.83705	0.05455	0.245683	no
XLOC_003899	XLOC_003899	Dgkepsilon	2R:12757545-12760999	Wild Type	ZnF2 Mutant	OK	9.92016	21.5718	1.12071	1.0986	0.05455	0.245683	no
XLOC_007351	XLOC_007351	CG16717	3L:9679200-9681060	Wild Type	ZnF2 Mutant	OK	2.43445	6.32611	1.37772	1.15768	0.05465	0.245733	no
XLOC_004633	XLOC_004633	Rgk3	2R:21255164-21280995	Wild Type	ZnF2 Mutant	OK	0.495589	0.039438	-3.65149	-1.41359	0.0547	0.245733	no
XLOC_009699	XLOC_009699	Lon	3L:19606207-19612199	Wild Type	ZnF2 Mutant	OK	61.2266	44.4899	-0.460683	-1.09413	0.0547	0.245733	no
XLOC_007967	XLOC_007967	HipHop	3L:18821170-18822353	Wild Type	ZnF2 Mutant	OK	5.91515	11.8427	1.00151	1.13928	0.0547	0.245734	no
XLOC_004995	XLOC_004995	MFS17	2R:2494741-2565385	Wild Type	ZnF2 Mutant	OK	6.17402	2.22896	-1.46984	-1.20937	0.0548	0.246027	no
XLOC_007242	XLOC_007242	GAPcenA	3L:8346560-8352279	Wild Type	ZnF2 Mutant	OK	8.67706	13.7466	0.663802	1.11402	0.05515	0.247441	no
XLOC_004831	XLOC_004831	angel	2R:23688076-23697824	Wild Type	ZnF2 Mutant	OK	7.09683	16.996	1.25995	1.18518	0.0552	0.247509	no
XLOC_011104	XLOC_011104	Lrrk	3R:20635479-20652450	Wild Type	ZnF2 Mutant	OK	3.86661	6.22817	0.687738	1.13703	0.05525	0.247576	no
XLOC_008978	XLOC_008978	Doc2	3L:9012685-9019246	Wild Type	ZnF2 Mutant	OK	3.65602	7.21528	0.98078	1.08124	0.0553	0.247643	no
XLOC_004223	XLOC_004223	PIG-V	2R:16955457-16957308	Wild Type	ZnF2 Mutant	OK	25.7771	16.0098	-0.687135	-1.1195	0.05535	0.24771	no
XLOC_004235	XLOC_004235	CG9646	2R:17048874-17053855	Wild Type	ZnF2 Mutant	OK	70.506	50.7578	-0.474116	-1.086	0.05545	0.248001	no
XLOC_010367	XLOC_010367	Pnn	3R:9740898-9742844	Wild Type	ZnF2 Mutant	OK	57.8835	37.3851	-0.630687	-1.10509	0.0555	0.248068	no
XLOC_002474	XLOC_002474	Mdh1	2L:10393773-10396332	Wild Type	ZnF2 Mutant	OK	313.872	234.357	-0.421468	-1.08655	0.0556	0.248358	no
XLOC_010745	XLOC_010745	Tm2	3R:15310192-15315197	Wild Type	ZnF2 Mutant	OK	3.59336	0.0197943	-7.5041	-1.28506	0.0557	0.248491	no
XLOC_006741	XLOC_006741	CG13887	3L:837860-839931	Wild Type	ZnF2 Mutant	OK	174.522	123.845	-0.494873	-1.1302	0.0557	0.248491	no
XLOC_011992	XLOC_011992	CG2604	3R:5221631-5223365	Wild Type	ZnF2 Mutant	OK	60.8457	41.5542	-0.550161	-1.08994	0.05575	0.248558	no
XLOC_001329	XLOC_001329	CG17681	2L:18153122-18154516	Wild Type	ZnF2 Mutant	OK	0.61128	2.25559	1.8836	1.17852	0.0558	0.248624	no
XLOC_010856	XLOC_010856	Cctgamma	3R:16647604-16649978	Wild Type	ZnF2 Mutant	OK	100.453	72.5297	-0.469875	-1.10043	0.05585	0.248691	no
XLOC_001686	XLOC_001686	Cda5	2L:25401-65404	Wild Type	ZnF2 Mutant	OK	3.27618	0.380587	-3.10572	-2.61516	0.05605	0.249424	no
XLOC_001036	XLOC_001036	CG6565	2L:13374018-13376404	Wild Type	ZnF2 Mutant	OK	9.83864	5.30952	-0.889876	-1.1168	0.05625	0.25	no
XLOC_011224	XLOC_011224	Sar1	3R:22356684-22360711	Wild Type	ZnF2 Mutant	OK	38.8602	25.0435	-0.633856	-1.10492	0.05625	0.25	no
XLOC_010009	XLOC_010009	rpk	3R:4645980-4648884	Wild Type	ZnF2 Mutant	OK	131.65	97.3747	-0.435086	-1.09527	0.05635	0.250287	no
XLOC_011879	XLOC_011879	CG34347	3R:31311156-31371748	Wild Type	ZnF2 Mutant	OK	0.261987	0.677121	1.36992	1.14663	0.0564	0.250352	no
XLOC_002292	XLOC_002292	MED20	2L:8071811-8072848	Wild Type	ZnF2 Mutant	OK	7.35001	13.5928	0.887023	1.05532	0.0567	0.251526	no
XLOC_012803	XLOC_012803	bor	3R:16261354-16264115	Wild Type	ZnF2 Mutant	OK	34.4393	22.9106	-0.588044	-1.0937	0.05675	0.25159	no
XLOC_008342	XLOC_008342	Vdup1	3L:176305-178963	Wild Type	ZnF2 Mutant	OK	0.932276	2.69192	1.52981	1.29909	0.0568	0.251655	no
XLOC_008717	XLOC_008717	Msr-110,snmRNA:357	3L:5566918-5577348	Wild Type	ZnF2 Mutant	OK	1.54573	0.0302515	-5.67513	-0.241271	0.05685	0.251719	no
XLOC_002046	XLOC_002046	Scox	2L:4967831-4968935	Wild Type	ZnF2 Mutant	OK	5.89255	11.9307	1.01771	1.13299	0.05705	0.252446	no
XLOC_006464	XLOC_006464	CG3499	2R:22882746-22886247	Wild Type	ZnF2 Mutant	OK	55.6924	39.3504	-0.501104	-1.09434	0.05725	0.253015	no
XLOC_007690	XLOC_007690	Tom	3L:14969343-14970306	Wild Type	ZnF2 Mutant	OK	256.066	349.712	0.449652	1.09037	0.05725	0.253015	no
XLOC_003874	XLOC_003874	CG8550	2R:12471914-12474021	Wild Type	ZnF2 Mutant	OK	0.212186	0.708502	1.73944	0.997627	0.0574	0.25352	no
XLOC_013849	XLOC_013849	CG11334,lox	3R:31458379-31463037	Wild Type	ZnF2 Mutant	OK	136.208	98.0494	-0.47423	-1.09549	0.05765	0.254465	no
XLOC_011402	XLOC_011402	atl	3R:24625670-24635165	Wild Type	ZnF2 Mutant	OK	76.0151	55.0317	-0.466024	-1.09903	0.05795	0.25563	no
XLOC_009070	XLOC_009070	E(z)	3L:10631078-10638130	Wild Type	ZnF2 Mutant	OK	14.2864	34.2571	1.26176	1.27338	0.058	0.255691	no
XLOC_013165	XLOC_013165	CG6455	3R:22019504-22023335	Wild Type	ZnF2 Mutant	OK	61.4056	43.7547	-0.488931	-1.09392	0.05805	0.255752	no
XLOC_010963	XLOC_010963	CG7985	3R:18199856-18215001	Wild Type	ZnF2 Mutant	OK	7.47172	4.16529	-0.843022	-1.10478	0.05815	0.255874	no
XLOC_002210	XLOC_002210	Fgop2	2L:6943177-6945289	Wild Type	ZnF2 Mutant	OK	80.6906	55.6584	-0.535799	-1.08982	0.05815	0.255874	no
XLOC_004144	XLOC_004144	Lis-1	2R:16178825-16185103	Wild Type	ZnF2 Mutant	OK	146.426	106.143	-0.464155	-1.09845	0.0582	0.255935	no
XLOC_005503	XLOC_005503	CG13185	2R:11867875-11885585	Wild Type	ZnF2 Mutant	OK	1.58041	2.48246	0.651474	1.06743	0.0583	0.256057	no
XLOC_000974	XLOC_000974	CG6405	2L:12424903-12426440	Wild Type	ZnF2 Mutant	OK	0.214422	1.65924	2.952	1.65294	0.0583	0.256057	no
XLOC_008403	XLOC_008403	snoRNA:Psi28S-3308	3L:826719-833385	Wild Type	ZnF2 Mutant	OK	0	2.8588	inf	-nan	0.05835	0.256118	no
XLOC_006452	XLOC_006452	Ppa	2R:22684954-22688987	Wild Type	ZnF2 Mutant	OK	208.952	161.423	-0.372327	-1.08565	0.05845	0.256398	no
XLOC_012411	XLOC_012411	Art1	3R:10786480-10788226	Wild Type	ZnF2 Mutant	OK	361.824	276.599	-0.38749	-1.08897	0.0586	0.256897	no
XLOC_000382	XLOC_000382	CG34126	2L:4981613-4992702	Wild Type	ZnF2 Mutant	OK	2.15208	1.14784	-0.906809	-1.08579	0.0587	0.257176	no
XLOC_003683	XLOC_003683	Pfk	2R:10109739-10117457	Wild Type	ZnF2 Mutant	OK	17.0673	10.958	-0.639255	-1.12265	0.05885	0.257673	no
XLOC_000310	XLOC_000310	CG3964	2L:3862667-3867507	Wild Type	ZnF2 Mutant	OK	4.79339	8.01331	0.741351	1.11236	0.05895	0.257952	no
XLOC_005616	XLOC_005616	CG4630	2R:13214705-13219247	Wild Type	ZnF2 Mutant	OK	2.47021	6.40496	1.37456	1.28404	0.059	0.258011	no
XLOC_013834	XLOC_013834	stops	3R:31134391-31178278	Wild Type	ZnF2 Mutant	OK	0.689134	3.18024	2.20628	1.28247	0.0591	0.258289	no
XLOC_001857	XLOC_001857	CG3609	2L:2372454-2374627	Wild Type	ZnF2 Mutant	OK	172.55	123.842	-0.478516	-1.095	0.0592	0.258566	no
XLOC_006275	XLOC_006275	Fem-1	2R:20661584-20667306	Wild Type	ZnF2 Mutant	OK	2.73938	5.40136	0.979471	1.10311	0.05935	0.258902	no
XLOC_008411	XLOC_008411	bab2	3L:1140428-1177276	Wild Type	ZnF2 Mutant	OK	0.237698	1.86714	2.97363	2.01804	0.05935	0.258902	no
XLOC_013219	XLOC_013219	CG31139,rumi	3R:22747689-22750597	Wild Type	ZnF2 Mutant	OK	46.1454	30.1983	-0.61172	-1.10115	0.05945	0.259179	no
XLOC_007842	XLOC_007842	CG32164	3L:16603052-16609347	Wild Type	ZnF2 Mutant	OK	23.6797	15.8378	-0.580281	-1.09523	0.0595	0.259237	no
XLOC_005357	XLOC_005357	Pka-R2	2R:9993889-10026042	Wild Type	ZnF2 Mutant	OK	3.8669	1.51311	-1.35366	-1.25519	0.05965	0.259687	no
XLOC_013010	XLOC_013010	Vha13	3R:19643017-19644386	Wild Type	ZnF2 Mutant	OK	176.729	122.884	-0.524233	-1.08231	0.0597	0.259687	no
XLOC_004439	XLOC_004439	Topors	2R:18972611-18977262	Wild Type	ZnF2 Mutant	OK	35.6891	25.1526	-0.504776	-1.0763	0.05975	0.259687	no
XLOC_008025	XLOC_008025	ms(3)76Cc	3L:19620501-19624309	Wild Type	ZnF2 Mutant	OK	0.443615	1.16615	1.39437	1.10061	0.05975	0.259687	no
XLOC_000804	XLOC_000804	SamDC	2L:10339456-10341503	Wild Type	ZnF2 Mutant	OK	45.4701	29.2391	-0.637017	-1.06464	0.0598	0.259745	no
XLOC_011014	XLOC_011014	CG6013	3R:19031502-19032409	Wild Type	ZnF2 Mutant	OK	155.859	109.293	-0.512035	-1.07145	0.06005	0.260568	no
XLOC_002203	XLOC_002203	CG13773	2L:6906665-6907844	Wild Type	ZnF2 Mutant	OK	28.5347	16.8076	-0.763606	-1.08306	0.0601	0.260568	no
XLOC_011786	XLOC_011786	CG34133	3R:29869364-29875159	Wild Type	ZnF2 Mutant	OK	10.7603	16.5047	0.617162	1.08522	0.0601	0.260568	no
XLOC_011978	XLOC_011978	Ubc6	3R:4948754-4952682	Wild Type	ZnF2 Mutant	OK	163.704	118.134	-0.470658	-1.05971	0.06025	0.260797	no
XLOC_005599	XLOC_005599	Mdr49	2R:12936890-12946347	Wild Type	ZnF2 Mutant	OK	102.715	136.6	0.411312	1.09844	0.06025	0.260797	no
XLOC_002930	XLOC_002930	BicD	2L:17459604-17474773	Wild Type	ZnF2 Mutant	OK	30.4186	11.1675	-1.44564	-1.2432	0.0603	0.260797	no
XLOC_008298	XLOC_008298	CG34031	3L:23174445-23185750	Wild Type	ZnF2 Mutant	OK	1.68918	6.27028	1.89221	1.13229	0.0603	0.260797	no
XLOC_012040	XLOC_012040	CG2911,Spec2	3R:5616643-5624125	Wild Type	ZnF2 Mutant	OK	165.622	121.028	-0.452558	-1.06047	0.0605	0.261183	no
XLOC_009304	XLOC_009304	Rgl	3L:13906896-13925335	Wild Type	ZnF2 Mutant	OK	18.5637	26.8266	0.531177	1.10033	0.0605	0.261183	no
XLOC_005089	XLOC_005089	Epac	2R:6759714-6798941	Wild Type	ZnF2 Mutant	OK	0.0530608	0.400946	2.91769	1.06217	0.0605	0.261183	no
XLOC_000386	XLOC_000386	CG33995,CG44001	2L:5037708-5051062	Wild Type	ZnF2 Mutant	OK	67.3562	34.7415	-0.95515	-1.12103	0.06075	0.262102	no
XLOC_011702	XLOC_011702	CG9990	3R:28675040-28695939	Wild Type	ZnF2 Mutant	OK	0.399831	0	-inf	-nan	0.0608	0.262158	no
XLOC_009109	XLOC_009109	Ir68a	3L:11232971-11236218	Wild Type	ZnF2 Mutant	OK	11.7219	7.12621	-0.717998	-1.0551	0.061	0.262861	no
XLOC_001670	XLOC_001670	Tif-IA	2L:22249875-22258260	Wild Type	ZnF2 Mutant	OK	19.55	12.2719	-0.671815	-1.08082	0.06105	0.262916	no
XLOC_008209	XLOC_008209	CG7407	3L:21823460-21824571	Wild Type	ZnF2 Mutant	OK	40.8815	25.4935	-0.681319	-1.06566	0.0611	0.262971	no
XLOC_010672	XLOC_010672	CG31517	3R:13948419-13951138	Wild Type	ZnF2 Mutant	OK	26.7994	15.1356	-0.824256	-1.07705	0.06115	0.263027	no
XLOC_000476	XLOC_000476	Kr-h2	2L:6070989-6073961	Wild Type	ZnF2 Mutant	OK	4.99503	10.31	1.04547	1.13681	0.0612	0.263082	no
XLOC_010287	XLOC_010287	CG8036	3R:8667867-8673702	Wild Type	ZnF2 Mutant	OK	25.5603	16.9628	-0.591534	-1.04141	0.06135	0.263567	no
XLOC_000314	XLOC_000314	CG34176	2L:4004079-4004480	Wild Type	ZnF2 Mutant	OK	2.34565	0	-inf	-nan	0.06165	0.264695	no
XLOC_011425	XLOC_011425	nct	3R:24851600-24856243	Wild Type	ZnF2 Mutant	OK	146.189	109.614	-0.415404	-1.0721	0.06185	0.265393	no
XLOC_005059	XLOC_005059	Ptr	2R:6181747-6196320	Wild Type	ZnF2 Mutant	OK	128.215	167.194	0.382954	1.06611	0.06195	0.265661	no
XLOC_011911	XLOC_011911	Acf1	3R:31793980-31805278	Wild Type	ZnF2 Mutant	OK	18.7219	26.478	0.500065	1.07186	0.062	0.265714	no
XLOC_008776	XLOC_008776	CG10274	3L:6174247-6181829	Wild Type	ZnF2 Mutant	OK	2.85045	7.3924	1.37485	1.11236	0.06205	0.265768	no
XLOC_010220	XLOC_010220	CG2641	3R:7794068-7796599	Wild Type	ZnF2 Mutant	OK	7.63478	3.83985	-0.991536	-1.10691	0.06225	0.266463	no
XLOC_006469	XLOC_006469	CG3800	2R:22934568-22937077	Wild Type	ZnF2 Mutant	OK	434.382	340.134	-0.352861	-1.06743	0.0624	0.266944	no
XLOC_011939	XLOC_011939	Vps24	3R:4307907-4310947	Wild Type	ZnF2 Mutant	OK	32.9866	19.9839	-0.723037	-1.05553	0.0626	0.267633	no
XLOC_000965	XLOC_000965	CG17217,CG31760,ZnT33D	2L:12142779-12172586	Wild Type	ZnF2 Mutant	OK	0.156362	2.23537	3.83755	0.409341	0.06265	0.267633	no
XLOC_013284	XLOC_013284	CG31145	3R:23605750-23669659	Wild Type	ZnF2 Mutant	OK	0.526052	0.154381	-1.76871	-1.01977	0.06275	0.267633	no
XLOC_007006	XLOC_007006	CG32250	3L:4318754-4322259	Wild Type	ZnF2 Mutant	OK	11.3856	20.731	0.864581	1.05301	0.06275	0.267633	no
XLOC_009840	XLOC_009840	Pc	3L:21304696-21318020	Wild Type	ZnF2 Mutant	OK	10.7106	21.5396	1.00795	1.20375	0.06275	0.267633	no
XLOC_007905	XLOC_007905	CG7510	3L:17621823-17630971	Wild Type	ZnF2 Mutant	OK	10.7354	6.703	-0.679498	-1.10235	0.06295	0.268324	no
XLOC_010358	XLOC_010358	SpdS	3R:9631640-9637611	Wild Type	ZnF2 Mutant	OK	50.6388	26.5387	-0.932146	-1.0693	0.06325	0.26944	no
XLOC_000796	XLOC_000796	CG4957	2L:10268871-10269904	Wild Type	ZnF2 Mutant	OK	0.88941	3.05704	1.78122	1.06076	0.0633	0.269491	no
XLOC_008553	XLOC_008553	NDUFS3	3L:3158484-3159578	Wild Type	ZnF2 Mutant	OK	189.566	137.034	-0.468165	-1.05772	0.0634	0.269755	no
XLOC_011898	XLOC_011898	CG1792	3R:31616302-31617837	Wild Type	ZnF2 Mutant	OK	2.81276	6.08858	1.11412	1.07589	0.0637	0.270868	no
XLOC_000371	XLOC_000371	CG3036	2L:4892111-4906762	Wild Type	ZnF2 Mutant	OK	95.3547	69.1379	-0.463827	-1.07017	0.06375	0.270918	no
XLOC_006082	XLOC_006082	Fak	2R:19430658-19437259	Wild Type	ZnF2 Mutant	OK	9.49115	14.4371	0.60513	1.07112	0.0638	0.270968	no
XLOC_005680	XLOC_005680	RN-tre	2R:13983394-13990707	Wild Type	ZnF2 Mutant	OK	100.801	73.9802	-0.446293	-1.0634	0.06405	0.271867	no
XLOC_002564	XLOC_002564	CG6509	2L:11501714-11517081	Wild Type	ZnF2 Mutant	OK	16.5832	11.5234	-0.525154	-1.0809	0.0643	0.272747	no
XLOC_012032	XLOC_012032	snoRNA:Psi28S-3091b	3R:5595363-5601136	Wild Type	ZnF2 Mutant	OK	0	1.88837	inf	-nan	0.06435	0.272747	no
XLOC_005698	XLOC_005698	CG8547	2R:14261205-14267919	Wild Type	ZnF2 Mutant	OK	1.02907	0.21509	-2.25832	-1.34256	0.06445	0.272747	no
XLOC_011263	XLOC_011263	Cyp6d4	3R:22698318-22700307	Wild Type	ZnF2 Mutant	OK	1.84782	0.491758	-1.90981	-1.16858	0.06445	0.272747	no
XLOC_000530	XLOC_000530	l(2)k09022	2L:6854141-6860849	Wild Type	ZnF2 Mutant	OK	50.5725	38.1624	-0.406204	-1.04218	0.06445	0.272747	no
XLOC_009359	XLOC_009359	ind	3L:15014694-15064977	Wild Type	ZnF2 Mutant	OK	2.43263	10.4685	2.10547	0.629406	0.0645	0.272796	no
XLOC_009602	XLOC_009602	CG5147	3L:18107847-18109574	Wild Type	ZnF2 Mutant	OK	3.44492	6.63577	0.945793	1.02048	0.0647	0.273478	no
XLOC_001219	XLOC_001219	CG17329	2L:16291283-16291948	Wild Type	ZnF2 Mutant	OK	0.808891	2.98111	1.88183	1.10624	0.0648	0.273737	no
XLOC_009471	XLOC_009471	CG45057	3L:16354745-16359428	Wild Type	ZnF2 Mutant	OK	2.03186	0.139192	-3.86766	-1.63334	0.065	0.274419	no
XLOC_012945	XLOC_012945	Vha100-2	3R:18390322-18400339	Wild Type	ZnF2 Mutant	OK	8.381	2.60136	-1.68786	-1.24147	0.06505	0.274466	no
XLOC_003253	XLOC_003253	step	2L:21740040-21757466	Wild Type	ZnF2 Mutant	OK	18.915	29.5436	0.643319	1.06222	0.06515	0.274724	no
XLOC_003429	XLOC_003429	Gadd45	2R:7249160-7250655	Wild Type	ZnF2 Mutant	OK	1.10041	0.313022	-1.81371	-1.13221	0.06525	0.274819	no
XLOC_011010	XLOC_011010	CG14286	3R:19024091-19024853	Wild Type	ZnF2 Mutant	OK	96.1261	64.2413	-0.581427	-1.06094	0.06525	0.274819	no
XLOC_007643	XLOC_007643	Gl	3L:13929386-13934656	Wild Type	ZnF2 Mutant	OK	8.29916	12.5014	0.591056	1.04944	0.06535	0.27496	no
XLOC_001415	XLOC_001415	CG13085,CG16771	2L:19400752-19430270	Wild Type	ZnF2 Mutant	OK	1.11449	0.146011	-2.93224	-0.327885	0.0654	0.27496	no
XLOC_007713	XLOC_007713	Tollo	3L:15235618-15242832	Wild Type	ZnF2 Mutant	OK	9.04268	5.9963	-0.592676	-1.01946	0.0654	0.27496	no
XLOC_002666	XLOC_002666	CG15480	2L:13224619-13225275	Wild Type	ZnF2 Mutant	OK	100.632	147.277	0.549449	1.06123	0.0656	0.275566	no
XLOC_002353	XLOC_002353	PrBP	2L:8684822-8685955	Wild Type	ZnF2 Mutant	OK	93.6853	130.732	0.480717	1.04299	0.06565	0.275566	no
XLOC_009473	XLOC_009473	roq	3L:16369825-16378566	Wild Type	ZnF2 Mutant	OK	48.3118	35.3513	-0.450614	-1.05274	0.0657	0.275566	no
XLOC_001931	XLOC_001931	CG3326	2L:3304099-3319872	Wild Type	ZnF2 Mutant	OK	13.947	22.2562	0.674257	1.0686	0.0657	0.275566	no
XLOC_006567	XLOC_006567	Thiolase	2R:23865413-23868603	Wild Type	ZnF2 Mutant	OK	42.4292	27.3395	-0.634074	-1.07753	0.0658	0.275822	no
XLOC_012849	XLOC_012849	AdSL	3R:17014575-17027987	Wild Type	ZnF2 Mutant	OK	60.1262	42.7933	-0.490608	-1.06385	0.06595	0.276124	no
XLOC_008415	XLOC_008415	CG9119	3L:1200785-1232700	Wild Type	ZnF2 Mutant	OK	1.21697	3.46063	1.50774	1.07004	0.06595	0.276124	no
XLOC_001358	XLOC_001358	CG10338	2L:18695663-18698571	Wild Type	ZnF2 Mutant	OK	14.2367	8.9003	-0.67769	-1.04656	0.06615	0.276634	no
XLOC_007877	XLOC_007877	TpnC73F	3L:17046062-17048390	Wild Type	ZnF2 Mutant	OK	0.681077	0	-inf	-nan	0.06615	0.276634	no
XLOC_001440	XLOC_001440	Lar	2L:19586622-19732069	Wild Type	ZnF2 Mutant	OK	19.8598	11.1596	-0.831572	-1.07072	0.0663	0.277098	no
XLOC_011649	XLOC_011649	Mtl	3R:27636411-27639871	Wild Type	ZnF2 Mutant	OK	158.732	116.001	-0.452453	-1.04148	0.0664	0.277352	no
XLOC_013505	XLOC_013505	CG6073	3R:26170846-26188807	Wild Type	ZnF2 Mutant	OK	6.86647	3.14259	-1.12761	-1.07725	0.06655	0.277815	no
XLOC_012262	XLOC_012262	hb	3R:8690979-8697822	Wild Type	ZnF2 Mutant	OK	206.594	160.575	-0.363547	-1.05877	0.06695	0.27932	no
XLOC_010078	XLOC_010078	CG10979	3R:5794704-5799994	Wild Type	ZnF2 Mutant	OK	6.0044	9.86027	0.715606	1.07175	0.0672	0.280198	no
XLOC_009968	XLOC_009968	Gfat1	3R:4126441-4137882	Wild Type	ZnF2 Mutant	OK	1.33197	0.178082	-2.90296	-1.67284	0.06725	0.280241	no
XLOC_003604	XLOC_003604	VhaAC45	2R:9207560-9209774	Wild Type	ZnF2 Mutant	OK	60.1109	42.3796	-0.504257	-1.06219	0.0675	0.281118	no
XLOC_010296	XLOC_010296	CG8202	3R:8732090-8735837	Wild Type	ZnF2 Mutant	OK	3.93477	6.78294	0.785632	1.03786	0.06755	0.28116	no
XLOC_009386	XLOC_009386	CG13454	3L:15516532-15517056	Wild Type	ZnF2 Mutant	OK	125.655	184.099	0.551019	1.02309	0.0677	0.281619	no
XLOC_009240	XLOC_009240	CG10948	3L:12844253-12850117	Wild Type	ZnF2 Mutant	OK	10.7371	16.7044	0.637627	1.06431	0.0678	0.28187	no
XLOC_006998	XLOC_006998	VhaM9.7-a	3L:4262704-4263464	Wild Type	ZnF2 Mutant	OK	5.20825	12.9393	1.31289	1.10102	0.06795	0.282327	no
XLOC_007958	XLOC_007958	GNBP1	3L:18675799-18677876	Wild Type	ZnF2 Mutant	OK	1.88658	3.91693	1.05395	1.0192	0.068	0.28237	no
XLOC_001121	XLOC_001121	CG34165	2L:14713749-14714526	Wild Type	ZnF2 Mutant	OK	0	0.503632	inf	-nan	0.06805	0.282411	no
XLOC_011324	XLOC_011324	CG10375	3R:23767711-23772859	Wild Type	ZnF2 Mutant	OK	111.769	157.472	0.494579	1.05557	0.06815	0.282661	no
XLOC_010991	XLOC_010991	Gos28	3R:18663737-18665307	Wild Type	ZnF2 Mutant	OK	85.7366	57.4313	-0.578074	-1.04884	0.06825	0.28291	no
XLOC_013863	XLOC_013863	CstF-50	3R:31735502-31736963	Wild Type	ZnF2 Mutant	OK	63.7388	89.6364	0.491912	1.03984	0.0684	0.283366	no
XLOC_002518	XLOC_002518	aurB	2L:10856796-10858094	Wild Type	ZnF2 Mutant	OK	158.538	212.157	0.420304	1.01901	0.06855	0.283821	no
XLOC_012446	XLOC_012446	Arfip	3R:11231911-11235013	Wild Type	ZnF2 Mutant	OK	9.74882	16.2944	0.741074	1.05413	0.0688	0.284523	no
XLOC_008482	XLOC_008482	CG13937	3L:1876550-1883041	Wild Type	ZnF2 Mutant	OK	0.108036	0.866424	3.00356	1.34676	0.0688	0.284523	no
XLOC_002458	XLOC_002458	CYLD	2L:10295858-10299847	Wild Type	ZnF2 Mutant	OK	10.2811	16.5711	0.688671	1.056	0.0689	0.284771	no
XLOC_003037	XLOC_003037	CG10702	2L:19064831-19069851	Wild Type	ZnF2 Mutant	OK	40.7669	29.2293	-0.479987	-1.04883	0.06915	0.285637	no
XLOC_001444	XLOC_001444	sick	2L:19796364-19958424	Wild Type	ZnF2 Mutant	OK	4.12157	2.328	-0.824107	-1.04334	0.06925	0.285883	no
XLOC_003566	XLOC_003566	CG30349	2R:8907517-8910885	Wild Type	ZnF2 Mutant	OK	62.51	44.0828	-0.503872	-1.05756	0.0693	0.285923	no
XLOC_007369	XLOC_007369	CG43897	3L:9813846-9834345	Wild Type	ZnF2 Mutant	OK	1.24344	0.116697	-3.41349	-1.48877	0.0695	0.286248	no
XLOC_002067	XLOC_002067	tkv	2L:5216700-5271384	Wild Type	ZnF2 Mutant	OK	41.9423	23.7082	-0.82302	-1.07593	0.0695	0.286248	no
XLOC_012635	XLOC_012635	Nsf2	3R:13833496-13837991	Wild Type	ZnF2 Mutant	OK	17.8635	26.5167	0.569888	1.03828	0.0695	0.286248	no
XLOC_001484	XLOC_001484	CG31688	2L:20426198-20449964	Wild Type	ZnF2 Mutant	OK	4.79347	2.57869	-0.894431	-1.06032	0.06955	0.286287	no
XLOC_008183	XLOC_008183	SMC5	3L:21569175-21573523	Wild Type	ZnF2 Mutant	OK	7.19601	11.3475	0.657103	1.05643	0.0697	0.286738	no
XLOC_006343	XLOC_006343	CG30288,CG30289	2R:21519242-21521848	Wild Type	ZnF2 Mutant	OK	0.607937	1.79035	1.55825	1.01589	0.06995	0.287599	no
XLOC_010749	XLOC_010749	ea	3R:15328728-15330408	Wild Type	ZnF2 Mutant	OK	119.797	87.4104	-0.454719	-1.02823	0.07	0.287638	no
XLOC_011619	XLOC_011619	Men-b	3R:27151661-27157603	Wild Type	ZnF2 Mutant	OK	1.93666	0.83592	-1.21213	-1.05281	0.0701	0.287882	no
XLOC_003086	XLOC_003086	CG10631	2L:19742816-19756904	Wild Type	ZnF2 Mutant	OK	1.03539	0.530939	-0.963558	-1.06426	0.07025	0.28833	no
XLOC_004408	XLOC_004408	CG10927	2R:18613089-18615018	Wild Type	ZnF2 Mutant	OK	15.373	5.55166	-1.46941	-1.06814	0.07035	0.288574	no
XLOC_004296	XLOC_004296	CG30108	2R:17669394-17670000	Wild Type	ZnF2 Mutant	OK	12.8295	5.12316	-1.32436	-1.09131	0.07045	0.288816	no
XLOC_011892	XLOC_011892	gammaCOP	3R:31572142-31575707	Wild Type	ZnF2 Mutant	OK	11.556	17.7877	0.622236	1.04575	0.07055	0.289059	no
XLOC_008647	XLOC_008647	Cip4	3L:4322490-4364102	Wild Type	ZnF2 Mutant	OK	97.6149	72.547	-0.428185	-1.03183	0.0706	0.28908	no
XLOC_003367	XLOC_003367	CG30431	2R:6202724-6205224	Wild Type	ZnF2 Mutant	OK	6.03318	3.14738	-0.938767	-1.0249	0.0707	0.28908	no
XLOC_007731	XLOC_007731	CG7427	3L:15563426-15565559	Wild Type	ZnF2 Mutant	OK	153.983	111.609	-0.464321	-1.04386	0.0707	0.28908	no
XLOC_006566	XLOC_006566	CG4585	2R:23862961-23865398	Wild Type	ZnF2 Mutant	OK	21.532	13.0079	-0.727097	-1.07378	0.0708	0.28908	no
XLOC_012997	XLOC_012997	Dl	3R:19302730-19326217	Wild Type	ZnF2 Mutant	OK	62.5628	45.5348	-0.458336	-1.04782	0.0708	0.28908	no
XLOC_011392	XLOC_011392	CG6607	3R:24528046-24530558	Wild Type	ZnF2 Mutant	OK	6.06973	11.7439	0.95221	1.0284	0.0708	0.28908	no
XLOC_002301	XLOC_002301	CG34134,CG8475	2L:8190296-8197049	Wild Type	ZnF2 Mutant	OK	14.6124	9.18084	-0.670495	-0.899477	0.07085	0.289117	no
XLOC_009228	XLOC_009228	CG4069	3L:12534589-12537315	Wild Type	ZnF2 Mutant	OK	79.0264	56.312	-0.488892	-1.03268	0.0709	0.289154	no
XLOC_007656	XLOC_007656	Pex1,btl	3L:14071891-14083229	Wild Type	ZnF2 Mutant	OK	12.095	7.62368	-0.665855	-1.06022	0.071	0.289396	no
XLOC_008175	XLOC_008175	Cdk12	3L:21516305-21522684	Wild Type	ZnF2 Mutant	OK	120.634	93.1724	-0.372667	-1.01607	0.07105	0.289433	no
XLOC_003620	XLOC_003620	Camta	2R:9446045-9480076	Wild Type	ZnF2 Mutant	OK	12.069	8.1719	-0.562563	-1.05811	0.0713	0.290284	no
XLOC_007133	XLOC_007133	CG8368	3L:6603683-6608739	Wild Type	ZnF2 Mutant	OK	68.5635	48.2627	-0.506531	-1.03576	0.0714	0.290524	no
XLOC_006513	XLOC_006513	vir	2R:23357659-23366355	Wild Type	ZnF2 Mutant	OK	51.7733	68.2482	0.398584	1.03706	0.0715	0.290764	no
XLOC_007208	XLOC_007208	RNaseX25	3L:7970587-7974991	Wild Type	ZnF2 Mutant	OK	75.6873	51.1681	-0.564806	-1.03295	0.07155	0.2908	no
XLOC_006296	XLOC_006296	CG3216	2R:20986832-20991171	Wild Type	ZnF2 Mutant	OK	2.47258	4.52923	0.873246	1.04063	0.0716	0.290836	no
XLOC_010525	XLOC_010525	GCC185	3R:12010771-12017031	Wild Type	ZnF2 Mutant	OK	19.8287	10.2628	-0.950164	-1.18557	0.0721	0.2927	no
XLOC_011926	XLOC_011926	CG40198	3R:4160609-4162235	Wild Type	ZnF2 Mutant	OK	1.56688	0	-inf	-nan	0.07225	0.293007	no
XLOC_007918	XLOC_007918	CG7430	3L:17846915-17849601	Wild Type	ZnF2 Mutant	OK	119.77	89.0427	-0.427699	-1.0276	0.0723	0.293007	no
XLOC_008057	XLOC_008057	gig	3L:20129180-20139010	Wild Type	ZnF2 Mutant	OK	53.5936	40.6807	-0.397717	-1.02834	0.0723	0.293007	no
XLOC_003327	XLOC_003327	CG30438	2R:5496673-5549543	Wild Type	ZnF2 Mutant	OK	2.57537	1.02091	-1.33492	-1.17958	0.07235	0.293042	no
XLOC_006995	XLOC_006995	pav	3L:4242733-4246233	Wild Type	ZnF2 Mutant	OK	35.8884	49.4804	0.463338	1.03585	0.0724	0.293077	no
XLOC_013309	XLOC_013309	sba	3R:23894173-23922973	Wild Type	ZnF2 Mutant	OK	1.56722	2.86816	0.871917	1.07085	0.07265	0.293921	no
XLOC_000384	XLOC_000384	Cg25C	2L:5029608-5037279	Wild Type	ZnF2 Mutant	OK	1.31585	0.030909	-5.41183	-2.77336	0.0727	0.293955	no
XLOC_004499	XLOC_004499	CG11018	2R:19662435-19663738	Wild Type	ZnF2 Mutant	OK	7.58937	4.03444	-0.911612	-0.974636	0.07285	0.294394	no
XLOC_013678	XLOC_013678	SP1029	3R:29244960-29250451	Wild Type	ZnF2 Mutant	OK	104.59	79.0348	-0.404189	-1.03666	0.07305	0.295034	no
XLOC_002000	XLOC_002000	CG3338	2L:4382924-4386062	Wild Type	ZnF2 Mutant	OK	16.7201	24.6695	0.561144	1.04574	0.07315	0.295269	no
XLOC_006046	XLOC_006046	MFS15	2R:18794617-18796678	Wild Type	ZnF2 Mutant	OK	6.24218	10.8132	0.792674	1.04148	0.0732	0.295303	no
XLOC_004950	XLOC_004950	Pof	2R:24669396-24688184	Wild Type	ZnF2 Mutant	OK	22.0368	33.5016	0.604318	1.03131	0.07345	0.296142	no
XLOC_013150	XLOC_013150	CASK,CRG	3R:21783399-21822674	Wild Type	ZnF2 Mutant	OK	5.28792	3.12164	-0.760398	-1.02567	0.0737	0.296812	no
XLOC_000944	XLOC_000944	CG12264	2L:11999653-12002266	Wild Type	ZnF2 Mutant	OK	4.21496	10.4002	1.30302	1.19568	0.0737	0.296812	no
XLOC_008123	XLOC_008123	CG11456	3L:20841986-20885188	Wild Type	ZnF2 Mutant	OK	10.3267	5.08948	-1.0208	-1.14629	0.07375	0.296845	no
XLOC_010074	XLOC_010074	jagn	3R:5754931-5781308	Wild Type	ZnF2 Mutant	OK	157.586	109.729	-0.522201	-1.01955	0.074	0.297682	no
XLOC_007980	XLOC_007980	CG6841	3L:18905371-18914150	Wild Type	ZnF2 Mutant	OK	17.7365	25.513	0.52451	1.02393	0.07405	0.297714	no
XLOC_004906	XLOC_004906	CG3376	2R:24258012-24265213	Wild Type	ZnF2 Mutant	OK	46.536	33.1923	-0.487496	-1.02514	0.0741	0.297746	no
XLOC_006616	XLOC_006616	slik	2R:24392128-24404527	Wild Type	ZnF2 Mutant	OK	85.9531	64.7903	-0.407772	-1.04394	0.0744	0.298782	no
XLOC_011874	XLOC_011874	spn-F	3R:31255126-31256659	Wild Type	ZnF2 Mutant	OK	54.4238	36.8752	-0.561589	-1.01953	0.0746	0.299415	no
XLOC_012925	XLOC_012925	mTerf5	3R:18221521-18223682	Wild Type	ZnF2 Mutant	OK	5.402	9.21556	0.770577	1.00223	0.07465	0.299446	no
XLOC_003443	XLOC_003443	CG11123,sPLA2	2R:7440705-7445792	Wild Type	ZnF2 Mutant	OK	54.8414	76.3956	0.478225	1.019	0.07475	0.299677	no
XLOC_012908	XLOC_012908	CG43102	3R:17768271-17794490	Wild Type	ZnF2 Mutant	OK	0.281956	0.774363	1.45754	1.19797	0.0748	0.299708	no
XLOC_012161	XLOC_012161	CG1142	3R:7472457-7473781	Wild Type	ZnF2 Mutant	OK	96.2353	135.39	0.492484	1.01619	0.07485	0.299739	no
XLOC_009571	XLOC_009571	NUCB1	3L:17797737-17802279	Wild Type	ZnF2 Mutant	OK	155.685	117.714	-0.403349	-1.04176	0.07515	0.30077	no
XLOC_009064	XLOC_009064	Gem3	3L:10459080-10463101	Wild Type	ZnF2 Mutant	OK	14.0683	9.23289	-0.607596	-1.03302	0.0753	0.3012	no
XLOC_007567	XLOC_007567	mirr	3L:12693638-12710249	Wild Type	ZnF2 Mutant	OK	0.920573	2.00336	1.12182	1.05223	0.0754	0.30143	no
XLOC_006984	XLOC_006984	Fit1	3L:4103563-4107116	Wild Type	ZnF2 Mutant	OK	81.7858	61.2658	-0.41677	-1.0336	0.0755	0.301659	no
XLOC_012478	XLOC_012478	Lk6	3R:11750930-11764457	Wild Type	ZnF2 Mutant	OK	178.147	223.276	0.325758	1.00973	0.07565	0.302088	no
XLOC_001078	XLOC_001078	Ance-2	2L:13909332-13911719	Wild Type	ZnF2 Mutant	OK	5.54159	9.38332	0.7598	1.00542	0.07575	0.302317	no
XLOC_001433	XLOC_001433	ref(2)P	2L:19542467-19546959	Wild Type	ZnF2 Mutant	OK	363.552	286.84	-0.341916	-1.02812	0.07585	0.302545	no
XLOC_011670	XLOC_011670	CG5527	3R:27954916-27957326	Wild Type	ZnF2 Mutant	OK	1.61685	3.44061	1.08948	1.05786	0.07595	0.302774	no
XLOC_005204	XLOC_005204	CG8712	2R:8091695-8098484	Wild Type	ZnF2 Mutant	OK	4.16808	8.25013	0.985035	1.04566	0.076	0.302802	no
XLOC_008039	XLOC_008039	CG8334	3L:19871138-19881783	Wild Type	ZnF2 Mutant	OK	2.04157	3.47734	0.768306	1.03673	0.07615	0.303229	no
XLOC_005578	XLOC_005578	CG8771	2R:12679966-12686179	Wild Type	ZnF2 Mutant	OK	8.06153	11.8743	0.558724	1.02433	0.07625	0.303287	no
XLOC_008525	XLOC_008525	CG12182	3L:2595780-2600242	Wild Type	ZnF2 Mutant	OK	11.6388	18.909	0.70013	1.06178	0.07625	0.303287	no
XLOC_005072	XLOC_005072	Fmo-2	2R:6642417-6645098	Wild Type	ZnF2 Mutant	OK	10.2046	6.00481	-0.765021	-0.987028	0.0765	0.303939	no
XLOC_006404	XLOC_006404	CG3045	2R:22136967-22174691	Wild Type	ZnF2 Mutant	OK	39.245	25.7891	-0.605746	-1.0241	0.0765	0.303939	no
XLOC_007646	XLOC_007646	Hsc70-1	3L:13974060-13977761	Wild Type	ZnF2 Mutant	OK	0.0329421	0.458997	3.80048	1.45766	0.07675	0.304762	no
XLOC_013071	XLOC_013071	CG4000	3R:20676223-20677858	Wild Type	ZnF2 Mutant	OK	0.379128	0.00889793	-5.41307	-0.840052	0.0769	0.305186	no
XLOC_012591	XLOC_012591	wntD	3R:13292051-13293198	Wild Type	ZnF2 Mutant	OK	9.14131	15.756	0.785426	0.984807	0.077	0.305412	no
XLOC_013868	XLOC_013868	CG2187	3R:31755355-31758637	Wild Type	ZnF2 Mutant	OK	1.40766	3.18326	1.17721	1.04331	0.0771	0.305637	no
XLOC_008932	XLOC_008932	CG17352	3L:8352354-8356296	Wild Type	ZnF2 Mutant	OK	0.712908	0.229684	-1.63407	-1.02682	0.0773	0.306114	no
XLOC_011064	XLOC_011064	Arc42	3R:19877736-19879309	Wild Type	ZnF2 Mutant	OK	12.844	20.4513	0.671095	0.988895	0.07735	0.306114	no
XLOC_003387	XLOC_003387	CG3267	2R:6746380-6748954	Wild Type	ZnF2 Mutant	OK	0.80902	1.99207	1.30002	1.00297	0.07735	0.306114	no
XLOC_007104	XLOC_007104	loj	3L:6094986-6096517	Wild Type	ZnF2 Mutant	OK	77.3441	52.7355	-0.552517	-1.03056	0.0775	0.306536	no
XLOC_009627	XLOC_009627	Chmp1	3L:18682894-18684061	Wild Type	ZnF2 Mutant	OK	14.2324	7.5982	-0.905449	-1.02016	0.07755	0.306563	no
XLOC_005061	XLOC_005061	CG30432	2R:6197386-6198266	Wild Type	ZnF2 Mutant	OK	2.27455	0.745729	-1.60886	-0.993126	0.07765	0.306787	no
XLOC_007861	XLOC_007861	sina	3L:16852526-16862517	Wild Type	ZnF2 Mutant	OK	104.634	78.5041	-0.414513	-1.01846	0.0777	0.306813	no
XLOC_005185	XLOC_005185	CG30381,rnh1	2R:7926652-7932380	Wild Type	ZnF2 Mutant	OK	59.298	39.896	-0.571737	-1.01688	0.07785	0.307063	no
XLOC_005413	XLOC_005413	Mat1	2R:10738616-10739829	Wild Type	ZnF2 Mutant	OK	3.90051	8.31182	1.0915	1.05366	0.07785	0.307063	no
XLOC_007700	XLOC_007700	Aats-gly	3L:15095141-15097686	Wild Type	ZnF2 Mutant	OK	22.272	14.8819	-0.581668	-1.01621	0.078	0.307312	no
XLOC_010693	XLOC_010693	pr-set7	3R:14316037-14326689	Wild Type	ZnF2 Mutant	OK	29.1081	40.8576	0.489185	1.0125	0.078	0.307312	no
XLOC_000610	XLOC_000610	Bsg	2L:8083419-8116531	Wild Type	ZnF2 Mutant	OK	141.527	107.777	-0.393026	-1.02145	0.0781	0.307364	no
XLOC_002305	XLOC_002305	Su(var)205	2L:8206170-8211122	Wild Type	ZnF2 Mutant	OK	749.903	945.242	0.33398	1.01305	0.0781	0.307364	no
XLOC_011572	XLOC_011572	CG5455	3R:26461526-26470008	Wild Type	ZnF2 Mutant	OK	0.295931	1.70318	2.52489	1.55963	0.07825	0.307596	no
XLOC_009637	XLOC_009637	CR45912	3L:18852572-18866107	Wild Type	ZnF2 Mutant	OK	0.0689967	0.393272	2.51093	1.23221	0.0783	0.307596	no
XLOC_013139	XLOC_013139	CG6353	3R:21661185-21662972	Wild Type	ZnF2 Mutant	OK	25.9624	16.0822	-0.690954	-1.03264	0.0784	0.307596	no
XLOC_007356	XLOC_007356	Ubc4	3L:9698335-9700481	Wild Type	ZnF2 Mutant	OK	334.989	253.417	-0.4026	-1.00519	0.0784	0.307596	no
XLOC_003345	XLOC_003345	Src42A	2R:5981843-6012795	Wild Type	ZnF2 Mutant	OK	93.3881	70.5925	-0.403724	-1.01612	0.0785	0.307596	no
XLOC_007290	XLOC_007290	mRpL12	3L:8956790-8957584	Wild Type	ZnF2 Mutant	OK	88.6271	60.1968	-0.558062	-0.989399	0.07855	0.307596	no
XLOC_005499	XLOC_005499	S2P	2R:11841607-11844240	Wild Type	ZnF2 Mutant	OK	67.1028	47.4997	-0.498454	-1.02894	0.07855	0.307596	no
XLOC_002950	XLOC_002950	CadN	2L:17647052-17778340	Wild Type	ZnF2 Mutant	OK	0.162372	0.384266	1.2428	1.02074	0.07855	0.307596	no
XLOC_012835	XLOC_012835	Ubx	3R:16656622-16734426	Wild Type	ZnF2 Mutant	OK	0.497749	1.23206	1.30758	1.04415	0.07855	0.307596	no
XLOC_005964	XLOC_005964	rhi	2R:17604950-17639138	Wild Type	ZnF2 Mutant	OK	43.8601	28.4514	-0.624411	-1.02609	0.0787	0.308013	no
XLOC_007360	XLOC_007360	defl	3L:9723422-9726706	Wild Type	ZnF2 Mutant	OK	9.42854	14.2292	0.593744	0.992906	0.07875	0.308039	no
XLOC_003731	XLOC_003731	CG12942	2R:10894458-10897885	Wild Type	ZnF2 Mutant	OK	7.49905	16.8026	1.16391	1.04131	0.07905	0.308896	no
XLOC_005343	XLOC_005343	Lsm11	2R:9836984-9839500	Wild Type	ZnF2 Mutant	OK	14.1658	5.86988	-1.27101	-1.18218	0.0791	0.308896	no
XLOC_004788	XLOC_004788	CG3085	2R:23074822-23079038	Wild Type	ZnF2 Mutant	OK	19.3013	10.6362	-0.859714	-0.977676	0.0791	0.308896	no
XLOC_012967	XLOC_012967	CG14299	3R:18750435-18758873	Wild Type	ZnF2 Mutant	OK	0.408663	0.880154	1.10685	1.03611	0.07925	0.309141	no
XLOC_005099	XLOC_005099	Spn42Db	2R:6872995-6880770	Wild Type	ZnF2 Mutant	OK	0.0381537	0.736586	4.27096	0.439913	0.07925	0.30914	no
XLOC_013571	XLOC_013571	woc	3R:27256594-27264055	Wild Type	ZnF2 Mutant	OK	45.9633	63.0075	0.455041	1.02312	0.07965	0.31053	no
XLOC_006363	XLOC_006363	Tim10	2R:21688772-21691139	Wild Type	ZnF2 Mutant	OK	145.593	99.649	-0.547011	-1.02391	0.0798	0.310772	no
XLOC_001250	XLOC_001250	CG17912	2L:16743404-16753704	Wild Type	ZnF2 Mutant	OK	170.237	223.371	0.391898	1.01627	0.0798	0.310772	no
XLOC_009310	XLOC_009310	CG8783	3L:13999379-14001880	Wild Type	ZnF2 Mutant	OK	4.66111	8.00933	0.781007	1.00281	0.08005	0.311427	no
XLOC_012786	XLOC_012786	CG4287	3R:15962166-15963867	Wild Type	ZnF2 Mutant	OK	58.9385	41.1306	-0.518999	-1.00571	0.0801	0.311427	no
XLOC_004707	XLOC_004707	MED16	2R:22183137-22185892	Wild Type	ZnF2 Mutant	OK	14.8726	21.9492	0.561516	1.00098	0.0801	0.311427	no
XLOC_002226	XLOC_002226	Pvf3	2L:7098187-7157695	Wild Type	ZnF2 Mutant	OK	0.0460685	0.475021	3.36614	1.40977	0.0803	0.312033	no
XLOC_005474	XLOC_005474	Sod3	2R:11380346-11384114	Wild Type	ZnF2 Mutant	OK	140.958	101.371	-0.475616	-1.00071	0.0805	0.312639	no
XLOC_012321	XLOC_012321	CG9399	3R:9571910-9574211	Wild Type	ZnF2 Mutant	OK	125.592	89.6019	-0.487138	-1.01319	0.0806	0.312855	no
XLOC_000179	XLOC_000179	Axud1	2L:2365344-2370137	Wild Type	ZnF2 Mutant	OK	108.451	83.6528	-0.374564	-1.00713	0.0807	0.313072	no
XLOC_004984	XLOC_004984	Kr	2R:25183627-25255318	Wild Type	ZnF2 Mutant	OK	112.679	147.339	0.386918	1.00326	0.08095	0.31387	no
XLOC_003370	XLOC_003370	Pld	2R:6242003-6255266	Wild Type	ZnF2 Mutant	OK	0.670326	0.219594	-1.61002	-1.0153	0.08105	0.314085	no
XLOC_013394	XLOC_013394	CG3744	3R:24871201-24876654	Wild Type	ZnF2 Mutant	OK	44.3309	32.5052	-0.447642	-1.0002	0.0811	0.314107	no
XLOC_009252	XLOC_009252	mRpL20	3L:13017148-13017867	Wild Type	ZnF2 Mutant	OK	31.1906	17.348	-0.846343	-1.0148	0.0812	0.314151	no
XLOC_007650	XLOC_007650	CG17361	3L:13997190-13999251	Wild Type	ZnF2 Mutant	OK	61.4598	34.1981	-0.845728	-1.06391	0.0812	0.314151	no
XLOC_013865	XLOC_013865	nero	3R:31746444-31747558	Wild Type	ZnF2 Mutant	OK	97.9127	69.9394	-0.485392	-0.98548	0.08125	0.314173	no
XLOC_002587	XLOC_002587	esc	2L:11814155-11928572	Wild Type	ZnF2 Mutant	OK	17.0952	31.079	0.862352	1.03672	0.08135	0.314388	no
XLOC_008799	XLOC_008799	zpg	3L:6603683-6608739	Wild Type	ZnF2 Mutant	OK	41.3428	4.44075	-3.21876	-1.77438	0.0815	0.314624	no
XLOC_010221	XLOC_010221	CG31473,sgll	3R:7810531-7813009	Wild Type	ZnF2 Mutant	OK	33.931	21.9549	-0.628058	-1.03575	0.0815	0.314624	no
XLOC_003540	XLOC_003540	rgr	2R:8600414-8614155	Wild Type	ZnF2 Mutant	OK	3.24599	5.57538	0.780409	1.00499	0.0818	0.31561	no
XLOC_006222	XLOC_006222	CG42690,CG42691,CG43195	2R:19944257-19946814	Wild Type	ZnF2 Mutant	OK	0.287715	1.34022	2.21975	1.02728	0.08185	0.315631	no
XLOC_008104	XLOC_008104	CG4858	3L:20526575-20527910	Wild Type	ZnF2 Mutant	OK	18.269	29.6603	0.699138	0.989973	0.0819	0.315652	no
XLOC_013447	XLOC_013447	Dhap-at	3R:25483097-25490936	Wild Type	ZnF2 Mutant	OK	1.82838	4.63319	1.34144	1.11785	0.08205	0.316058	no
XLOC_005505	XLOC_005505	MCPH1	2R:11895996-11903918	Wild Type	ZnF2 Mutant	OK	2.99256	7.64485	1.35311	1.09033	0.0821	0.316078	no
XLOC_007625	XLOC_007625	CG14110	3L:13384788-13385925	Wild Type	ZnF2 Mutant	OK	2.25416	0.700653	-1.68582	-1.0584	0.08215	0.316099	no
XLOC_005902	XLOC_005902	CG30461,ste24b,ste24c	2R:16973926-17000126	Wild Type	ZnF2 Mutant	OK	2.14952	4.64895	1.11289	0.964423	0.08235	0.316696	no
XLOC_004578	XLOC_004578	CG11110	2R:20641741-20643785	Wild Type	ZnF2 Mutant	OK	22.3077	6.92756	-1.68712	-1.09589	0.08245	0.316909	no
XLOC_008379	XLOC_008379	CG3402	3L:651541-652881	Wild Type	ZnF2 Mutant	OK	14.3251	23.2302	0.697454	0.965338	0.0825	0.316929	no
XLOC_009035	XLOC_009035	CG10809	3L:9857382-9859889	Wild Type	ZnF2 Mutant	OK	11.4997	17.8401	0.633527	0.997494	0.0828	0.317909	no
XLOC_013513	XLOC_013513	CG34291	3R:26425289-26428400	Wild Type	ZnF2 Mutant	OK	2.24375	0	-inf	-nan	0.08295	0.318312	no
XLOC_000589	XLOC_000589	CG7164,Uro	2L:7780084-7782760	Wild Type	ZnF2 Mutant	OK	0.182062	2.55231	3.8093	1.99867	0.08305	0.318523	no
XLOC_005315	XLOC_005315	wun	2R:9400530-9413463	Wild Type	ZnF2 Mutant	OK	21.9727	13.7275	-0.678646	-1.00658	0.0832	0.318753	no
XLOC_011321	XLOC_011321	Rpt5	3R:23752875-23760600	Wild Type	ZnF2 Mutant	OK	28.0743	55.161	0.974401	1.00613	0.0832	0.318753	no
XLOC_013601	XLOC_013601	CG12428	3R:27700360-27706751	Wild Type	ZnF2 Mutant	OK	100.548	133.876	0.41301	0.998661	0.0834	0.319347	no
XLOC_013515	XLOC_013515	plum	3R:26470077-26535217	Wild Type	ZnF2 Mutant	OK	0.473008	0.157742	-1.5843	-0.985495	0.0836	0.319767	no
XLOC_012818	XLOC_012818	CG42232	3R:16458279-16469663	Wild Type	ZnF2 Mutant	OK	10.3151	13.9653	0.437082	0.970821	0.0836	0.319767	no
XLOC_005722	XLOC_005722	CG12862	2R:14640213-14640626	Wild Type	ZnF2 Mutant	OK	0	0.551646	inf	-nan	0.08385	0.320222	no
XLOC_012863	XLOC_012863	CG31262	3R:17217115-17223074	Wild Type	ZnF2 Mutant	OK	4.61978	2.21492	-1.06057	-1.05328	0.0839	0.320222	no
XLOC_002502	XLOC_002502	CG6750	2L:10731399-10732423	Wild Type	ZnF2 Mutant	OK	108.454	77.0985	-0.492304	-0.987553	0.0839	0.320222	no
XLOC_007655	XLOC_007655	CG32138	3L:14051205-14071583	Wild Type	ZnF2 Mutant	OK	7.09973	14.1745	0.997464	1.13627	0.0839	0.320222	no
XLOC_012642	XLOC_012642	CG9925	3R:13960711-13964174	Wild Type	ZnF2 Mutant	OK	24.3938	17.0106	-0.520076	-0.995296	0.084	0.320431	no
XLOC_012027	XLOC_012027	CG2926	3R:5579300-5588380	Wild Type	ZnF2 Mutant	OK	103.302	81.9748	-0.333616	-1.0013	0.08415	0.32083	no
XLOC_012448	XLOC_012448	CG17734	3R:11242207-11243999	Wild Type	ZnF2 Mutant	OK	13.3792	6.59667	-1.02018	-1.02744	0.08425	0.320866	no
XLOC_000745	XLOC_000745	zf30C	2L:9758341-9762375	Wild Type	ZnF2 Mutant	OK	125.003	96.1327	-0.378864	-0.999561	0.08425	0.320866	no
XLOC_007694	XLOC_007694	CG5114	3L:14982834-14984486	Wild Type	ZnF2 Mutant	OK	14.0631	22.3663	0.66941	1.00213	0.08435	0.321074	no
XLOC_013205	XLOC_013205	CG31156	3R:22587754-22613656	Wild Type	ZnF2 Mutant	OK	41.339	27.1815	-0.604876	-0.977864	0.08445	0.321282	no
XLOC_010951	XLOC_010951	CG7785,CG7794	3R:18021599-18025378	Wild Type	ZnF2 Mutant	OK	52.3243	36.9996	-0.499973	-0.981821	0.0846	0.321507	no
XLOC_009763	XLOC_009763	Ide	3L:20370312-20375896	Wild Type	ZnF2 Mutant	OK	5.11063	8.36201	0.710349	0.9914	0.0846	0.321507	no
XLOC_001145	XLOC_001145	vas	2L:15061655-15074383	Wild Type	ZnF2 Mutant	OK	5.7393	12.3609	1.10684	0.989596	0.0848	0.322094	no
XLOC_006224	XLOC_006224	CG16898	2R:20003619-20005003	Wild Type	ZnF2 Mutant	OK	0.547729	0	-inf	-nan	0.08485	0.322112	no
XLOC_011420	XLOC_011420	Saf-B	3R:24817463-24822350	Wild Type	ZnF2 Mutant	OK	119.16	152.827	0.359007	0.985332	0.08495	0.322318	no
XLOC_009469	XLOC_009469	CG4925	3L:16348073-16351951	Wild Type	ZnF2 Mutant	OK	5.4522	9.69003	0.829663	1.00982	0.08535	0.323663	no
XLOC_010484	XLOC_010484	CG5276	3R:11431737-11435703	Wild Type	ZnF2 Mutant	OK	28.7042	17.8374	-0.686353	-0.996403	0.0854	0.323679	no
XLOC_012489	XLOC_012489	Cad87A	3R:11893511-11949129	Wild Type	ZnF2 Mutant	OK	52.2628	40.2208	-0.377843	-0.983979	0.0855	0.323884	no
XLOC_011693	XLOC_011693	snoRNA:Psi28S-3405b	3R:28599833-28605777	Wild Type	ZnF2 Mutant	OK	0	1.87719	inf	-nan	0.0856	0.32409	no
XLOC_013600	XLOC_013600	ALiX	3R:27695234-27700110	Wild Type	ZnF2 Mutant	OK	46.4024	33.6613	-0.463109	-0.98534	0.08565	0.324106	no
XLOC_008088	XLOC_008088	CR43943	3L:20439953-20440563	Wild Type	ZnF2 Mutant	OK	1.37271	4.42907	1.68997	1.04446	0.0857	0.324122	no
XLOC_003478	XLOC_003478	CG30377	2R:7890024-7916478	Wild Type	ZnF2 Mutant	OK	2.94224	0.8006	-1.87776	-1.36236	0.0858	0.324327	no
XLOC_008505	XLOC_008505	CG5707	3L:2189159-2192221	Wild Type	ZnF2 Mutant	OK	6.13314	2.89103	-1.08504	-1.05203	0.0859	0.324531	no
XLOC_005291	XLOC_005291	CG8078	2R:9095272-9098525	Wild Type	ZnF2 Mutant	OK	7.52087	13.5212	0.846248	1.02444	0.08595	0.324547	no
XLOC_003617	XLOC_003617	wun2	2R:9414341-9417846	Wild Type	ZnF2 Mutant	OK	17.7515	11.3092	-0.650446	-0.999085	0.08615	0.325129	no
XLOC_011414	XLOC_011414	CG13631	3R:24769350-24770933	Wild Type	ZnF2 Mutant	OK	0.499476	0.117704	-2.08526	-1.01738	0.0862	0.325144	no
XLOC_004224	XLOC_004224	CG6665	2R:16957464-16958927	Wild Type	ZnF2 Mutant	OK	38.7035	25.9196	-0.578419	-0.997685	0.08635	0.325363	no
XLOC_001884	XLOC_001884	CG9961	2L:2739985-2744934	Wild Type	ZnF2 Mutant	OK	0.341545	3.04077	3.15429	0.509918	0.08635	0.325363	no
XLOC_005167	XLOC_005167	U2A	2R:7674449-7676362	Wild Type	ZnF2 Mutant	OK	6.06767	15.501	1.35315	1.15761	0.08645	0.325394	no
XLOC_007505	XLOC_007505	snoRNA:Psi18S-920	3L:11822850-11825732	Wild Type	ZnF2 Mutant	OK	0	2.76891	inf	-nan	0.08645	0.325394	no
XLOC_004453	XLOC_004453	cora	2R:19229062-19243751	Wild Type	ZnF2 Mutant	OK	1.19023	0.5458	-1.12479	-0.90413	0.0865	0.325409	no
XLOC_009433	XLOC_009433	Taspase1	3L:16083992-16087525	Wild Type	ZnF2 Mutant	OK	35.0099	23.3468	-0.584539	-0.994912	0.08655	0.325424	no
XLOC_009584	XLOC_009584	CG5535	3L:17852623-17856794	Wild Type	ZnF2 Mutant	OK	38.7774	27.2886	-0.506919	-0.974079	0.08665	0.325627	no
XLOC_002027	XLOC_002027	CG3225	2L:4813008-4818245	Wild Type	ZnF2 Mutant	OK	8.68348	14.1284	0.702254	0.990781	0.0867	0.325642	no
XLOC_005759	XLOC_005759	CG8089	2R:15145824-15147824	Wild Type	ZnF2 Mutant	OK	1.11261	0.375418	-1.56738	-0.967487	0.08675	0.325657	no
XLOC_008583	XLOC_008583	CG14971	3L:3466427-3471309	Wild Type	ZnF2 Mutant	OK	4.85255	2.49003	-0.962582	-1.0279	0.087	0.326423	no
XLOC_001720	XLOC_001720	crq	2L:431226-453024	Wild Type	ZnF2 Mutant	OK	13.2304	4.51793	-1.55013	-1.06151	0.08715	0.326813	no
XLOC_005270	XLOC_005270	CG8258	2R:8904843-8906990	Wild Type	ZnF2 Mutant	OK	24.223	35.3846	0.546745	0.984651	0.08755	0.328139	no
XLOC_007733	XLOC_007733	CG16979	3L:15576569-15578674	Wild Type	ZnF2 Mutant	OK	5.51373	9.30392	0.75481	0.987887	0.0876	0.328152	no
XLOC_008818	XLOC_008818	CG10075	3L:6955990-6958108	Wild Type	ZnF2 Mutant	OK	32.9713	16.1068	-1.03354	-1.00544	0.08765	0.328166	no
XLOC_009775	XLOC_009775	CG11796	3L:20436249-20439921	Wild Type	ZnF2 Mutant	OK	1.29916	4.88219	1.90995	1.00267	0.0877	0.32818	no
XLOC_012408	XLOC_012408	CG45076,CG45078,fau	3R:10768000-10777374	Wild Type	ZnF2 Mutant	OK	2.89272	0.117445	-4.62237	-1.92122	0.0879	0.328754	no
XLOC_002215	XLOC_002215	sip2	2L:6960376-6964074	Wild Type	ZnF2 Mutant	OK	148.837	192.035	0.367639	0.976575	0.0881	0.329328	no
XLOC_003511	XLOC_003511	CR44275	2R:8228970-8232330	Wild Type	ZnF2 Mutant	OK	43.6906	21.7177	-1.00845	-1.02952	0.08815	0.329341	no
XLOC_001368	XLOC_001368	CG17322	2L:18826769-18831153	Wild Type	ZnF2 Mutant	OK	17.2093	7.95881	-1.11257	-1.09259	0.0882	0.329354	no
XLOC_009105	XLOC_009105	Plod	3L:11198165-11206016	Wild Type	ZnF2 Mutant	OK	46.8721	33.6519	-0.478042	-0.995661	0.0883	0.329554	no
XLOC_001763	XLOC_001763	Plap	2L:1166505-1172805	Wild Type	ZnF2 Mutant	OK	23.6776	35.8622	0.598941	0.994261	0.08835	0.329567	no
XLOC_004115	XLOC_004115	tun	2R:15762564-15855645	Wild Type	ZnF2 Mutant	OK	117.526	87.6005	-0.423975	-0.974855	0.089	0.331817	no
XLOC_005152	XLOC_005152	CR44209	2R:7533189-7533497	Wild Type	ZnF2 Mutant	OK	0.649244	0	-inf	-nan	0.0891	0.332015	no
XLOC_003534	XLOC_003534	Mal-A6	2R:8465157-8467595	Wild Type	ZnF2 Mutant	OK	0.472266	0	-inf	-nan	0.08925	0.332399	no
XLOC_000005	XLOC_000005	galectin	2L:66317-76211	Wild Type	ZnF2 Mutant	OK	10.1778	2.45474	-2.05178	-1.03132	0.0893	0.33241	no
XLOC_006086	XLOC_006086	Oseg6	2R:19487045-19491846	Wild Type	ZnF2 Mutant	OK	2.48498	4.13934	0.736166	0.958598	0.08935	0.332421	no
XLOC_006198	XLOC_006198	5SrRNA:CR33367	2R:19760966-19761101	Wild Type	ZnF2 Mutant	OK	0	1.86788	inf	-nan	0.0896	0.333176	no
XLOC_013011	XLOC_013011	CG6195	3R:19646929-19648410	Wild Type	ZnF2 Mutant	OK	8.11422	13.8212	0.768354	0.967553	0.08985	0.333931	no
XLOC_000351	XLOC_000351	CG15436	2L:4463610-4465075	Wild Type	ZnF2 Mutant	OK	13.9192	8.26089	-0.75271	-0.984819	0.0899	0.333941	no
XLOC_009851	XLOC_009851	Neu2	3L:21484890-21490586	Wild Type	ZnF2 Mutant	OK	160.844	118.956	-0.435234	-0.979683	0.08995	0.333952	no
XLOC_008361	XLOC_008361	Atac3	3L:324984-327992	Wild Type	ZnF2 Mutant	OK	3.03335	5.43571	0.841557	0.957397	0.09	0.333962	no
XLOC_013755	XLOC_013755	CG1983	3R:30175785-30177700	Wild Type	ZnF2 Mutant	OK	25.9962	15.7968	-0.718665	-1.01483	0.09015	0.334344	no
XLOC_011147	XLOC_011147	Ubpy	3R:21134261-21138214	Wild Type	ZnF2 Mutant	OK	8.11173	12.258	0.595644	0.936416	0.09045	0.335281	no
XLOC_004869	XLOC_004869	mr	2R:23972430-23975408	Wild Type	ZnF2 Mutant	OK	42.9119	31.1276	-0.463181	-0.956686	0.09065	0.335846	no
XLOC_010503	XLOC_010503	Ho	3R:11679742-11684342	Wild Type	ZnF2 Mutant	OK	48.4207	32.2446	-0.586567	-0.975107	0.09075	0.336041	no
XLOC_004062	XLOC_004062	Cyp317a1	2R:14898311-14928425	Wild Type	ZnF2 Mutant	OK	0.687765	0.0854693	-3.00844	-0.728405	0.0909	0.33642	no
XLOC_002275	XLOC_002275	CR45364	2L:7871977-7872367	Wild Type	ZnF2 Mutant	OK	0.701345	0	-inf	-nan	0.09105	0.336799	no
XLOC_002763	XLOC_002763	osp,tRNA:P:35Bb	2L:14599195-14689340	Wild Type	ZnF2 Mutant	OK	3.38405	1.56066	-1.11659	-1.00725	0.09135	0.337733	no
XLOC_013649	XLOC_013649	Inx3	3R:28845269-28870439	Wild Type	ZnF2 Mutant	OK	284.737	363.231	0.351256	0.976076	0.09165	0.338665	no
XLOC_005106	XLOC_005106	CG30157,Cyp6u1	2R:6971995-6975133	Wild Type	ZnF2 Mutant	OK	5.3542	9.7982	0.871846	0.971917	0.0918	0.339042	no
XLOC_003778	XLOC_003778	CG34228	2R:11651856-11652339	Wild Type	ZnF2 Mutant	OK	4.09281	9.1785	1.16517	0.880431	0.0919	0.339066	no
XLOC_013634	XLOC_013634	Ppn	3R:28520664-28540324	Wild Type	ZnF2 Mutant	OK	0.53959	0.00691236	-6.28654	-1.88589	0.09195	0.339066	no
XLOC_007374	XLOC_007374	nudE	3L:9898702-9903031	Wild Type	ZnF2 Mutant	OK	63.4929	45.2878	-0.487472	-0.979885	0.09195	0.339066	no
XLOC_010594	XLOC_010594	Arp1	3R:12691732-12694842	Wild Type	ZnF2 Mutant	OK	14.6794	22.6094	0.623132	0.952289	0.09205	0.339258	no
XLOC_006894	XLOC_006894	CG1271	3L:3052513-3054906	Wild Type	ZnF2 Mutant	OK	1.80825	3.7472	1.05122	1.03041	0.0922	0.339457	no
XLOC_010126	XLOC_010126	Hr83	3R:6349242-6350512	Wild Type	ZnF2 Mutant	OK	0.458214	1.36093	1.5705	0.797531	0.0922	0.339457	no
XLOC_013731	XLOC_013731	CG7903	3R:29993474-29995231	Wild Type	ZnF2 Mutant	OK	69.5107	49.7113	-0.483663	-0.967469	0.0923	0.339649	no
XLOC_003847	XLOC_003847	CG30047	2R:12351792-12355413	Wild Type	ZnF2 Mutant	OK	0.487672	0.0913123	-2.41703	-1.30744	0.09245	0.340024	no
XLOC_000266	XLOC_000266	Snx1	2L:3449682-3452106	Wild Type	ZnF2 Mutant	OK	1.33595	0.60032	-1.15406	-0.942285	0.0926	0.340399	no
XLOC_011492	XLOC_011492	MED28	3R:25477002-25477745	Wild Type	ZnF2 Mutant	OK	22.3156	36.0643	0.692515	0.977281	0.09265	0.340406	no
XLOC_007358	XLOC_007358	snmRNA:838,vsg	3L:9714323-9717716	Wild Type	ZnF2 Mutant	OK	53.6235	38.7633	-0.468174	-0.979731	0.09275	0.340596	no
XLOC_005985	XLOC_005985	Mapmodulin	2R:17866177-17872015	Wild Type	ZnF2 Mutant	OK	488.411	394.5	-0.30807	-0.951793	0.093	0.341337	no
XLOC_009778	XLOC_009778	CG32428	3L:20469673-20473723	Wild Type	ZnF2 Mutant	OK	36.1351	23.7108	-0.607857	-0.952218	0.0934	0.342451	no
XLOC_000041	XLOC_000041	ex	2L:431226-453024	Wild Type	ZnF2 Mutant	OK	2.72435	5.69225	1.06309	0.944071	0.0934	0.342451	no
XLOC_013372	XLOC_013372	puf	3R:24635269-24650043	Wild Type	ZnF2 Mutant	OK	14.1278	10.5633	-0.419467	-0.965101	0.0937	0.343195	no
XLOC_011598	XLOC_011598	CG5500	3R:26876629-26881171	Wild Type	ZnF2 Mutant	OK	8.20332	14.9844	0.869183	0.966449	0.0937	0.343195	no
XLOC_005941	XLOC_005941	Bap55	2R:17429352-17430963	Wild Type	ZnF2 Mutant	OK	149.944	195.355	0.381682	0.958759	0.09395	0.343933	no
XLOC_007327	XLOC_007327	CG3689	3L:9411037-9426758	Wild Type	ZnF2 Mutant	OK	14.5371	35.3231	1.28087	1.09796	0.0942	0.34467	no
XLOC_005250	XLOC_005250	CG8735	2R:8596971-8599962	Wild Type	ZnF2 Mutant	OK	34.8456	23.0013	-0.599262	-0.981078	0.0944	0.344867	no
XLOC_010081	XLOC_010081	dgrn	3R:5824614-5826576	Wild Type	ZnF2 Mutant	OK	6.86371	11.9602	0.801183	0.982174	0.0944	0.344867	no
XLOC_010376	XLOC_010376	snoRNA:Psi18S-1275	3R:9778041-9783054	Wild Type	ZnF2 Mutant	OK	0	5.44065	inf	-nan	0.0944	0.344867	no
XLOC_009543	XLOC_009543	Sec3	3L:17421786-17425217	Wild Type	ZnF2 Mutant	OK	9.87976	6.36391	-0.634563	-0.938488	0.0945	0.345054	no
XLOC_012698	XLOC_012698	l(3)L1231	3R:14642671-14655716	Wild Type	ZnF2 Mutant	OK	64.0945	49.0885	-0.384815	-0.961816	0.0946	0.345241	no
XLOC_004364	XLOC_004364	nopo	2R:18180495-18184090	Wild Type	ZnF2 Mutant	OK	1.02049	5.02701	2.30044	1.41167	0.0947	0.345428	no
XLOC_012686	XLOC_012686	CG8461	3R:14511837-14513637	Wild Type	ZnF2 Mutant	OK	51.5031	81.4575	0.661386	0.960471	0.0949	0.345801	no
XLOC_003895	XLOC_003895	CG13148	2R:12686248-12689876	Wild Type	ZnF2 Mutant	OK	0.180464	1.21904	2.75596	1.35635	0.0949	0.345801	no
XLOC_010496	XLOC_010496	CG14711	3R:11620089-11626638	Wild Type	ZnF2 Mutant	OK	9.05373	25.5427	1.49633	1.00333	0.0952	0.346542	no
XLOC_000802	XLOC_000802	CG5037	2L:10331470-10333129	Wild Type	ZnF2 Mutant	OK	111.258	82.8527	-0.425288	-0.947551	0.09525	0.346542	no
XLOC_012804	XLOC_012804	Mat89Ba	3R:16267011-16272415	Wild Type	ZnF2 Mutant	OK	82.456	63.6365	-0.373771	-0.957427	0.09525	0.346542	no
XLOC_006053	XLOC_006053	CG18190	2R:18850843-18853043	Wild Type	ZnF2 Mutant	OK	7.4229	18.0098	1.27873	1.01657	0.0954	0.346909	no
XLOC_003372	XLOC_003372	Bap170	2R:6636511-6642358	Wild Type	ZnF2 Mutant	OK	130.3	103.765	-0.328523	-0.965604	0.09595	0.348554	no
XLOC_000630	XLOC_000630	CG7840	2L:8305585-8308192	Wild Type	ZnF2 Mutant	OK	432.944	336.396	-0.364019	-0.964511	0.096	0.348554	no
XLOC_005339	XLOC_005339	CG1648	2R:9810973-9820053	Wild Type	ZnF2 Mutant	OK	1.62561	0	-inf	-nan	0.096	0.348554	no
XLOC_010840	XLOC_010840	CG10405	3R:16454491-16455797	Wild Type	ZnF2 Mutant	OK	1.55016	3.43275	1.14695	0.871211	0.0962	0.349101	no
XLOC_007923	XLOC_007923	CG7408	3L:17879095-17884376	Wild Type	ZnF2 Mutant	OK	0.742961	0.190255	-1.96535	-1.18306	0.09635	0.349466	no
XLOC_008481	XLOC_008481	dre4	3L:1871573-1876312	Wild Type	ZnF2 Mutant	OK	11.8467	17.0903	0.528694	0.958146	0.0965	0.349831	no
XLOC_006964	XLOC_006964	Sc2	3L:3903491-3905035	Wild Type	ZnF2 Mutant	OK	85.9746	61.6274	-0.48034	-0.951601	0.09695	0.351282	no
XLOC_011656	XLOC_011656	Acp98AB	3R:27694882-27695057	Wild Type	ZnF2 Mutant	OK	0	0.882114	inf	-nan	0.09705	0.351465	no
XLOC_012439	XLOC_012439	ZnT86D	3R:11212307-11214539	Wild Type	ZnF2 Mutant	OK	15.998	10.2377	-0.643996	-0.956528	0.0972	0.351648	no
XLOC_010011	XLOC_010011	spartin	3R:4654799-4657985	Wild Type	ZnF2 Mutant	OK	0.997684	2.38563	1.25771	1.03798	0.0972	0.351648	no
XLOC_006881	XLOC_006881	Atg2	3L:2774337-2780677	Wild Type	ZnF2 Mutant	OK	13.7145	18.7918	0.454398	0.955288	0.09735	0.352011	no
XLOC_000304	XLOC_000304	Reph	2L:3803544-3810671	Wild Type	ZnF2 Mutant	OK	5.81047	3.41406	-0.767164	-0.975938	0.0977	0.353096	no
XLOC_005642	XLOC_005642	cnn	2R:13439313-13450475	Wild Type	ZnF2 Mutant	OK	93.7791	118.939	0.342884	0.949711	0.09805	0.354181	no
XLOC_005334	XLOC_005334	Uba1	2R:9688288-9693328	Wild Type	ZnF2 Mutant	OK	43.5039	56.8746	0.386639	0.949108	0.0983	0.354903	no
XLOC_009657	XLOC_009657	Mkp3	3L:19066154-19086426	Wild Type	ZnF2 Mutant	OK	21.3711	30.6402	0.519762	0.969511	0.0984	0.355083	no
XLOC_009713	XLOC_009713	CG14103	3L:19803737-19805080	Wild Type	ZnF2 Mutant	OK	116.54	84.3205	-0.466874	-0.960022	0.0986	0.355623	no
XLOC_000807	XLOC_000807	CG5022	2L:10344441-10347706	Wild Type	ZnF2 Mutant	OK	1.85366	3.61299	0.962815	0.944503	0.09875	0.355983	no
XLOC_005164	XLOC_005164	CG12042	2R:7665827-7669029	Wild Type	ZnF2 Mutant	OK	2.46422	5.13158	1.05827	0.856406	0.0992	0.357423	no
XLOC_009909	XLOC_009909	CR45382	3L:22473951-22474431	Wild Type	ZnF2 Mutant	OK	0	0.6233	inf	-nan	0.0993	0.357601	no
XLOC_009213	XLOC_009213	ArfGAP1	3L:12415025-12417580	Wild Type	ZnF2 Mutant	OK	130.06	100.016	-0.378944	-0.938907	0.0995	0.358139	no
XLOC_003288	XLOC_003288	CG40042	2L:23312464-23313578	Wild Type	ZnF2 Mutant	OK	12.6587	20.6714	0.70751	0.919075	0.09965	0.358495	no
XLOC_001836	XLOC_001836	CG15387	2L:2225544-2226294	Wild Type	ZnF2 Mutant	OK	2.11494	6.80119	1.68517	1.03145	0.0997	0.358495	no
XLOC_011830	XLOC_011830	PH4alphaEFB	3R:30466049-30485799	Wild Type	ZnF2 Mutant	OK	1.89359	4.19031	1.14593	1.0647	0.1	0.359391	no
XLOC_007004	XLOC_007004	CG1319	3L:4292481-4293432	Wild Type	ZnF2 Mutant	OK	14.7364	24.0611	0.707321	0.926289	0.10015	0.359747	no
XLOC_002508	XLOC_002508	CG6724	2L:10768233-10769952	Wild Type	ZnF2 Mutant	OK	26.6518	38.6752	0.537177	0.948436	0.10055	0.361001	no
XLOC_011672	XLOC_011672	CG4849	3R:27963414-27966958	Wild Type	ZnF2 Mutant	OK	63.5636	83.0554	0.385873	0.950259	0.1007	0.361356	no
XLOC_011017	XLOC_011017	ATPsyn-d	3R:19094999-19096271	Wild Type	ZnF2 Mutant	OK	559.079	436.236	-0.357945	-0.939094	0.101	0.362245	no
XLOC_007013	XLOC_007013	CG15020	3L:4421661-4426621	Wild Type	ZnF2 Mutant	OK	0.683387	0.22131	-1.62664	-0.980199	0.10105	0.362245	no
XLOC_012930	XLOC_012930	Vps39	3R:18271188-18274446	Wild Type	ZnF2 Mutant	OK	55.5655	41.4758	-0.421919	-0.947216	0.1012	0.362599	no
XLOC_005008	XLOC_005008	CR45923	2R:4621117-4622481	Wild Type	ZnF2 Mutant	OK	0.0443537	3.59035	6.33892	2.49039	0.1013	0.362774	no
XLOC_005657	XLOC_005657	CG45088,CG6191	2R:13580312-13593339	Wild Type	ZnF2 Mutant	OK	5.40952	8.38688	0.632634	0.947344	0.1014	0.362948	no
XLOC_003892	XLOC_003892	Iswi	2R:12636670-12640628	Wild Type	ZnF2 Mutant	OK	242.103	298.278	0.301038	0.946143	0.10165	0.363659	no
XLOC_004189	XLOC_004189	CG34457	2R:16670325-16671836	Wild Type	ZnF2 Mutant	OK	1.16179	0.0682678	-4.089	-1.70345	0.10175	0.363833	no
XLOC_006031	XLOC_006031	CG5482	2R:18629593-18632045	Wild Type	ZnF2 Mutant	OK	111.013	83.479	-0.411241	-0.940081	0.10215	0.365068	no
XLOC_011708	XLOC_011708	CG1646	3R:28812101-28819668	Wild Type	ZnF2 Mutant	OK	104.67	138.674	0.40585	0.945462	0.1022	0.365068	no
XLOC_001525	XLOC_001525	CG9336	2L:20858694-20861014	Wild Type	ZnF2 Mutant	OK	2.04497	0	-inf	-nan	0.10225	0.365068	no
XLOC_004187	XLOC_004187	CG5065	2R:16607653-16624894	Wild Type	ZnF2 Mutant	OK	0.540801	1.37478	1.34603	0.965079	0.10245	0.365598	no
XLOC_011353	XLOC_011353	Npc2f	3R:24137894-24140936	Wild Type	ZnF2 Mutant	OK	1.04505	3.075	1.55701	0.978651	0.1026	0.365937	no
XLOC_004970	XLOC_004970	CG3760	2R:24938180-24940483	Wild Type	ZnF2 Mutant	OK	14.2946	29.755	1.05766	1.0297	0.1027	0.365937	no
XLOC_007804	XLOC_007804	CG4982	3L:16301452-16302027	Wild Type	ZnF2 Mutant	OK	0.62694	0	-inf	-nan	0.1027	0.365937	no
XLOC_009078	XLOC_009078	CG6404	3L:10884260-10886471	Wild Type	ZnF2 Mutant	OK	5.9256	9.79502	0.725088	0.913707	0.103	0.366821	no
XLOC_000817	XLOC_000817	Ir31a	2L:10405564-10408197	Wild Type	ZnF2 Mutant	OK	0.154252	0.545786	1.82304	0.943075	0.10325	0.367526	no
XLOC_010281	XLOC_010281	CG31460	3R:8562672-8563798	Wild Type	ZnF2 Mutant	OK	54.4477	33.8844	-0.684251	-0.956951	0.10345	0.368053	no
XLOC_003871	XLOC_003871	Dyb	2R:12437344-12452916	Wild Type	ZnF2 Mutant	OK	6.66515	10.4711	0.651711	0.951891	0.10355	0.368224	no
XLOC_000087	XLOC_000087	ast	2L:1077947-1080803	Wild Type	ZnF2 Mutant	OK	5.11236	8.11281	0.666211	0.93383	0.1039	0.369283	no
XLOC_004411	XLOC_004411	Sec6	2R:18625248-18627718	Wild Type	ZnF2 Mutant	OK	4.44273	7.20362	0.697276	0.91082	0.10405	0.369631	no
XLOC_004840	XLOC_004840	CG5532	2R:23752753-23798395	Wild Type	ZnF2 Mutant	OK	147.525	203.398	0.463347	0.933395	0.1042	0.369978	no
XLOC_005024	XLOC_005024	TpnC4	2R:5496673-5549543	Wild Type	ZnF2 Mutant	OK	0.0119086	1.15054	6.59417	0.392059	0.10435	0.370325	no
XLOC_010000	XLOC_010000	CG14650	3R:4437386-4441328	Wild Type	ZnF2 Mutant	OK	116.686	91.9111	-0.344317	-0.93656	0.1045	0.370469	no
XLOC_002715	XLOC_002715	CG16886	2L:13914724-13956188	Wild Type	ZnF2 Mutant	OK	0.627244	1.99	1.66567	0.706689	0.10455	0.370469	no
XLOC_009749	XLOC_009749	CG6933	3L:20218499-20220420	Wild Type	ZnF2 Mutant	OK	5.45923	0	-inf	-nan	0.10455	0.370469	no
XLOC_011063	XLOC_011063	CG4686	3R:19864495-19875678	Wild Type	ZnF2 Mutant	OK	70.5017	48.1612	-0.549786	-0.952657	0.1046	0.370469	no
[truncated: 14,597 more rows]

## Sheet: Down- and Up-regulated genes
Down-regulated (>2-fold, p-value<0.05)					Up-regulated (>2-fold, p-value<0.05)
mat	mat-zyg	zyg	unassigned		mat	mat-zyg	zyg	unassigned
FBgn0000032	FBgn0028952	FBgn0000658	FBgn0010357		FBgn0000046	FBgn0001965	FBgn0000395	FBgn0035641
FBgn0000064	FBgn0033101	FBgn0002629	FBgn0034292		FBgn0002542	FBgn0003862	FBgn0000723	FBgn0033518
FBgn0000116	FBgn0035244	FBgn0002773	FBgn0039091		FBgn0003891	FBgn0004463	FBgn0001075	FBgn0033520
FBgn0000158	FBgn0038034	FBgn0003719	FBgn0035546		FBgn0010097	FBgn0005672	FBgn0001123	FBgn0052475
FBgn0000166	FBgn0039288	FBgn0004054	FBgn0033592		FBgn0011236	FBgn0005674	FBgn0001148	FBgn0053530
FBgn0000251	FBgn0261560	FBgn0005590	FBgn0036717		FBgn0014006	FBgn0005696	FBgn0001235	FBgn0034788
FBgn0001078		FBgn0010651	FBgn0050457		FBgn0015279	FBgn0010278	FBgn0001323	FBgn0042131
FBgn0001085		FBgn0011653	FBgn0051198		FBgn0016054	FBgn0010638	FBgn0001987	FBgn0053285
FBgn0001120		FBgn0013725	FBgn0085263		FBgn0021796	FBgn0011225	FBgn0002543	FBgn0259738
FBgn0001223		FBgn0021776	FBgn0069969		FBgn0024352	FBgn0011638	FBgn0002945	FBgn0263087
FBgn0001226		FBgn0024150	FBgn0038285		FBgn0026239	FBgn0011704	FBgn0003002
FBgn0001941		FBgn0031719	FBgn0037635		FBgn0027499	FBgn0011771	FBgn0003145
FBgn0002413		FBgn0034275	FBgn0033980		FBgn0027594	FBgn0015376	FBgn0003313
FBgn0002524		FBgn0035157	FBgn0036264		FBgn0027598	FBgn0015513	FBgn0003326
FBgn0002567		FBgn0035315	FBgn0050029		FBgn0027948	FBgn0015618	FBgn0003866
FBgn0003087		FBgn0035569	FBgn0262531		FBgn0032157	FBgn0019938	FBgn0004110
FBgn0003114		FBgn0036778	FBgn0263707		FBgn0032796	FBgn0020312	FBgn0004364
FBgn0003165		FBgn0036948	FBgn0263971		FBgn0033683	FBgn0020389	FBgn0004394
FBgn0003169		FBgn0037845	FBgn0264298		FBgn0034068	FBgn0020616	FBgn0004892
FBgn0003270		FBgn0037970	FBgn0264299		FBgn0034249	FBgn0021795	FBgn0010105
FBgn0003435		FBgn0038032	FBgn0250815		FBgn0034641	FBgn0021944	FBgn0010389
FBgn0003525		FBgn0038033	FBgn0020637		FBgn0034728	FBgn0022153	FBgn0010452
FBgn0004507		FBgn0038052	FBgn0038294		FBgn0034859	FBgn0023172	FBgn0011286
FBgn0004872		FBgn0043791	FBgn0264695		FBgn0035060	FBgn0023388	FBgn0011706
FBgn0004876		FBgn0052227	FBgn0002939		FBgn0035145	FBgn0024371	FBgn0012037
FBgn0004889		FBgn0062335	FBgn0005636		FBgn0035211	FBgn0025790	FBgn0013272
FBgn0005632		FBgn0085295	FBgn0001228		FBgn0035424	FBgn0025802	FBgn0013469
FBgn0005671		FBgn0086519	FBgn0002716		FBgn0035642	FBgn0025830	FBgn0014342
FBgn0010053		FBgn0086611	FBgn0065080		FBgn0035830	FBgn0027094	FBgn0014388
FBgn0010288		FBgn0260003	FBgn0262102		FBgn0035957	FBgn0027607	FBgn0015277
FBgn0010549		FBgn0261952	FBgn0262106		FBgn0036373	FBgn0028647	FBgn0015380
FBgn0010905			FBgn0262605		FBgn0036483	FBgn0028694	FBgn0015541
FBgn0011509			FBgn0263555		FBgn0036486	FBgn0028894	FBgn0016797
FBgn0011705			FBgn0266486		FBgn0037098	FBgn0028965	FBgn0020294
FBgn0011740			FBgn0266488		FBgn0037364	FBgn0031356	FBgn0020299
FBgn0013732			FBgn0267601		FBgn0037371	FBgn0031549	FBgn0023214
FBgn0013799					FBgn0037788	FBgn0031752	FBgn0024234
FBgn0013995					FBgn0037810	FBgn0031872	FBgn0024244
FBgn0014931					FBgn0037975	FBgn0032244	FBgn0026077
FBgn0015360					FBgn0038098	FBgn0032348	FBgn0027611
FBgn0015568					FBgn0038811	FBgn0032451	FBgn0029082
FBgn0015776					FBgn0038989	FBgn0032499	FBgn0029095
FBgn0016070					FBgn0039301	FBgn0032633	FBgn0029123
FBgn0019925					FBgn0039348	FBgn0033087	FBgn0031257
FBgn0020445					FBgn0039537	FBgn0033194	FBgn0031869
FBgn0022097					FBgn0039635	FBgn0033354	FBgn0031879
FBgn0024957					FBgn0040268	FBgn0033454	FBgn0031945
FBgn0026570					FBgn0050184	FBgn0033486	FBgn0032681
FBgn0026602					FBgn0052251	FBgn0033519	FBgn0032682
FBgn0026616					FBgn0053503	FBgn0033924	FBgn0032691
FBgn0026630					FBgn0086898	FBgn0034142	FBgn0032848
FBgn0027558					FBgn0259244	FBgn0034259	FBgn0033108
FBgn0027583					FBgn0260861	FBgn0034310	FBgn0033159
FBgn0027843					FBgn0260985	FBgn0034447	FBgn0033188
FBgn0027872					FBgn0261797	FBgn0034650	FBgn0033649
FBgn0028380					FBgn0261850	FBgn0034734	FBgn0033652
FBgn0028916					FBgn0262114	FBgn0034982	FBgn0033817
FBgn0028984					FBgn0262517	FBgn0035149	FBgn0034606
FBgn0029092					FBgn0264326	FBgn0035150	FBgn0034797
FBgn0029506					FBgn0264560	FBgn0035372	FBgn0035137
FBgn0031313					FBgn0264785	FBgn0035703	FBgn0035264
FBgn0031374					FBgn0265262	FBgn0036684	FBgn0035295
FBgn0031384					FBgn0265623	FBgn0037531	FBgn0035348
FBgn0031401					FBgn0266717	FBgn0037552	FBgn0035856
FBgn0031474					FBgn0267002	FBgn0037561	FBgn0036186
FBgn0031491						FBgn0037897	FBgn0036494
FBgn0031703						FBgn0038016	FBgn0036732
FBgn0031738						FBgn0038038	FBgn0036882
FBgn0031741						FBgn0038039	FBgn0037744
FBgn0031779						FBgn0038146	FBgn0037902
FBgn0031895						FBgn0038369	FBgn0037992
FBgn0032026						FBgn0038552	FBgn0039139
FBgn0032029						FBgn0038578	FBgn0039283
FBgn0032217						FBgn0038609	FBgn0039286
FBgn0032262						FBgn0038760	FBgn0039727
FBgn0032350						FBgn0038890	FBgn0039734
FBgn0032453						FBgn0038981	FBgn0040001
FBgn0032456						FBgn0039189	FBgn0040106
FBgn0032587						FBgn0039306	FBgn0040297
FBgn0032704						FBgn0039339	FBgn0050296
FBgn0032748						FBgn0039590	FBgn0051414
FBgn0032943						FBgn0040079	FBgn0052982
FBgn0033095						FBgn0040283	FBgn0053207
FBgn0033391						FBgn0040777	FBgn0085400
FBgn0033635						FBgn0041186	FBgn0085471
FBgn0033757						FBgn0041627	FBgn0087012
FBgn0033761						FBgn0042111	FBgn0259173
FBgn0033777						FBgn0051040	FBgn0259211
FBgn0033836						FBgn0051638	FBgn0259823
FBgn0033844						FBgn0052100	FBgn0260642
FBgn0034025						FBgn0052104	FBgn0260745
FBgn0034098						FBgn0053229	FBgn0260746
FBgn0034371						FBgn0067864	FBgn0261563
FBgn0034389						FBgn0086444	FBgn0261649
FBgn0034491						FBgn0086695	FBgn0261800
FBgn0034494						FBgn0259676	FBgn0261963
FBgn0034570						FBgn0259991	FBgn0263392
FBgn0034689						FBgn0260990	FBgn0264894
FBgn0034733						FBgn0261823	FBgn0265082
FBgn0034753						FBgn0264325	FBgn0267348
FBgn0034962						FBgn0264855	FBgn0268063
FBgn0035083						FBgn0265140	FBgn0283709
FBgn0035166						FBgn0266268
FBgn0035336						FBgn0266282
FBgn0035440						FBgn0266465
FBgn0035770						FBgn0266918
FBgn0035771						FBgn0267825
FBgn0035936						FBgn0275436
FBgn0036039						FBgn0284256
FBgn0036043						FBgn0285892
FBgn0036152
FBgn0036199
FBgn0036237
FBgn0036333
FBgn0036689
FBgn0036816
FBgn0036887
FBgn0037239
FBgn0037592
FBgn0037617
FBgn0037636
FBgn0037643
FBgn0037655
FBgn0037664
FBgn0037756
FBgn0037838
FBgn0037844
FBgn0037848
FBgn0038035
FBgn0038243
FBgn0038252
FBgn0038256
FBgn0038286
FBgn0038438
FBgn0038588
FBgn0038721
FBgn0038815
FBgn0038965
FBgn0039098
FBgn0039207
FBgn0039637
FBgn0039668
FBgn0039972
FBgn0040239
FBgn0040823
FBgn0040985
FBgn0041111
FBgn0041150
FBgn0041582
FBgn0041604
FBgn0042135
FBgn0042174
FBgn0042185
FBgn0045063
FBgn0050467
FBgn0051092
FBgn0051163
FBgn0051755
FBgn0051875
FBgn0052350
FBgn0052365
FBgn0052446
FBgn0052451
FBgn0052485
FBgn0053230
FBgn0058006
FBgn0066101
FBgn0087003
FBgn0086254
FBgn0086371
FBgn0086676
FBgn0086687
FBgn0086711
FBgn0250848
FBgn0250850
FBgn0260743
FBgn0260866
FBgn0260934
FBgn0260941
FBgn0260960
FBgn0261550
FBgn0261556
FBgn0261698
FBgn0261938
FBgn0261987
FBgn0262103
FBgn0262169
FBgn0262473
FBgn0262737
FBgn0263006
FBgn0263397
FBgn0264307
FBgn0264747
FBgn0264979
FBgn0266084
FBgn0283500
FBgn0285913

## Sheet: mRNA decay Overlap
Thomsen et al class II			Thomsen et al class III convert			Thomsen et al class IV converted			Down-regulated maternal genes	Class II	Class III	Class IV
CG3740	FBgn0023530		CG13956	FBgn0040207		CG7719	FBgn0260399		FBgn0000032	FBgn0033391	FBgn0026602	FBgn0000032
CG5869	FBgn0028894		CG8191	FBgn0030675		CG11880	FBgn0039637		FBgn0000064	FBgn0037844		FBgn0000064
CG6358	FBgn0004832		CG7950	FBgn0085346		CG11474	FBgn0034688		FBgn0000116			FBgn0000166
CG8026	FBgn0033391		CG7950	FBgn0260468		CG6703	FBgn0013759		FBgn0000158			FBgn0001078
CG11655	FBgn0030638		CG11301	FBgn0034726		CG10077	FBgn0035720		FBgn0000166			FBgn0001085
CG10426	FBgn0036273		CG9799	FBgn0038146		CG10961	FBgn0265464		FBgn0000251			FBgn0001941
CG4933	FBgn0283681		CG10050	FBgn0037492		CG3143	FBgn0038197		FBgn0001078			FBgn0002524
CG17367	FBgn0028717		CG33493	FBgn0053493		CG12991	FBgn0030847		FBgn0001085			FBgn0002567
CG13344	FBgn0033884		CG4185	FBgn0028926		CG7407	FBgn0037134		FBgn0001120			FBgn0003087
CG8683	FBgn0031985		CG6410	FBgn0034265		CG5216	FBgn0024291		FBgn0001223			FBgn0003114
CG4225	FBgn0038376		CG13969	FBgn0045064		CG12340	FBgn0027499		FBgn0001226			FBgn0003165
CG1550	FBgn0033225		CG34104	FBgn0083940		CG32108	FBgn0260965		FBgn0001941			FBgn0003169
CG33493	FBgn0053493		CG9704	FBgn0004108		CG9779	FBgn0037231		FBgn0002413			FBgn0003435
CG4947	FBgn0031321		CG15317	FBgn0030137		CG3361	FBgn0039507		FBgn0002524			FBgn0004889
CG7143	FBgn0037141		CG4685	FBgn0039349		CG13461	FBgn0036468		FBgn0002567			FBgn0005632
CG12252	FBgn0035026		CG34414	FBgn0085443		CG6657	FBgn0265174		FBgn0003087			FBgn0005671
CG6574	FBgn0037846		CG6379	FBgn0029693		CG6657	FBgn0265195		FBgn0003114			FBgn0010905
CG32152	FBgn0052152		CG14084	FBgn0260857		CG5124	FBgn0000057		FBgn0003165			FBgn0011509
CG1989	FBgn0026749		CG12093	FBgn0035372		CG15111	FBgn0034419		FBgn0003169			FBgn0011705
CG9325	FBgn0263391		CG8414	FBgn0034073		CG4798	FBgn0022029		FBgn0003270			FBgn0013732
CG11237	FBgn0034452		CG18766	FBgn0042111		CG2113	FBgn0035384		FBgn0003435			FBgn0013799
CG11752	FBgn0030292		CG3371	FBgn0035153		CG2258	FBgn0029997		FBgn0003525			FBgn0014931
CG4159	FBgn0038811		CG1539	FBgn0082582		CG17604	FBgn0000246		FBgn0004507			FBgn0016070
CG32278	FBgn0052278		CG15014	FBgn0035532		CG4832	FBgn0013765		FBgn0004872			FBgn0019925
CG6061	FBgn0033846		CG6877	FBgn0036813		CG5821	FBgn0022985		FBgn0004876			FBgn0026616
CG17530	FBgn0063494		CG11396	FBgn0037022		CG33785	FBgn0061362		FBgn0004889			FBgn0026630
CG8493	FBgn0033716		CG8183	FBgn0019968		CG8474	FBgn0025874		FBgn0005632			FBgn0027558
CG6369	FBgn0039260		CG11699	FBgn0030311		CG2947	FBgn0029676		FBgn0005671			FBgn0027583
CG32537	FBgn0052537		CG4813	FBgn0039013		CG1975	FBgn0028408		FBgn0010053			FBgn0027843
CG30443	FBgn0050443		CG10914	FBgn0034307		CG10732	FBgn0036365		FBgn0010288			FBgn0027872
CG4061	FBgn0025630		CG5313	FBgn0032244		CG1602	FBgn0033186		FBgn0010549			FBgn0028380
CG31938	FBgn0260648		CG3738	FBgn0010314		CG6203	FBgn0028734		FBgn0010905			FBgn0028916
CG8506	FBgn0261064		CG6568	FBgn0034210		CG11836	FBgn0039272		FBgn0011509			FBgn0029092
CG14485	FBgn0034262		CG4109	FBgn0036643		CG31793	FBgn0051793		FBgn0011705			FBgn0029506
CG6153	FBgn0032445		CG8605	FBgn0035762		CG3744	FBgn0039240		FBgn0011740			FBgn0031374
CG4313	FBgn0025632		CG11886	FBgn0041186		CG6022	FBgn0038925		FBgn0013732			FBgn0031401
CG17280	FBgn0034877		CG14788	FBgn0266284		CG9062	FBgn0033607		FBgn0013799			FBgn0031474
CG12107	FBgn0033209		CG30493	FBgn0050493		CG2984	FBgn0022768		FBgn0013995			FBgn0031491
CG31764	FBgn0043841		CG11208	FBgn0034488		CG14646	FBgn0037241		FBgn0014931			FBgn0031703
CG10344	FBgn0034729		CG3773	FBgn0038692		CG4644	FBgn0261938		FBgn0015360			FBgn0031779
CG3902	FBgn0036824		CG1099	FBgn0023388		CG6070	FBgn0039487		FBgn0015568			FBgn0032262
CG34415	FBgn0085444		CG5147	FBgn0036775		CG3629	FBgn0000157		FBgn0015776			FBgn0032456
CG10648	FBgn0030067		CG7879	FBgn0035235		CG5366	FBgn0027568		FBgn0016070			FBgn0032587
CG12320	FBgn0038590		CG9900	FBgn0004643		CG12084	FBgn0043458		FBgn0019925			FBgn0032704
CG17597	FBgn0032715		CG8417	FBgn0037744		CG17494	FBgn0040011		FBgn0020445			FBgn0032748
CG9784	FBgn0030761		CG5793	FBgn0038858		CG12702	FBgn0031070		FBgn0022097			FBgn0033095
CG11048	FBgn0034487		CG1763	FBgn0002948		CG1236	FBgn0037370		FBgn0024957			FBgn0033757
CG4249	FBgn0028525		CG5333	FBgn0038055		CG7776	FBgn0000581		FBgn0026570			FBgn0033777
CG15908	FBgn0033085		CG5333	FBcl0481533		CG3397	FBgn0037975		FBgn0026602			FBgn0033844
CG5961	FBgn0038056		CG4153	FBgn0004926		CG32554	FBgn0052554		FBgn0026616			FBgn0034025
CG1763	FBgn0002948		CG14536	FBgn0031950		CG31687	FBgn0051687		FBgn0026630			FBgn0034371
CG10855	FBgn0035461		CG5442	FBgn0265298		CG11870	FBgn0262617		FBgn0027558			FBgn0034491
CG5577	FBgn0036759		CG12892	FBgn0033526		CG17342	FBgn0017581		FBgn0027583			FBgn0034494
CG9688	FBgn0039765		CG13339	FBgn0033871		CG14622	FBgn0025641		FBgn0027843			FBgn0034570
CG9643	FBgn0031485		CG12765	FBgn0033813		CG31005	FBgn0051005		FBgn0027872			FBgn0034689
CG6361	FBgn0030925		CG8866	FBgn0037679		CG8284	FBgn0015321		FBgn0028380			FBgn0034733
CG10433	FBgn0034638		CG8975	FBgn0011704		CG9453	FBgn0265137		FBgn0028916			FBgn0034962
CG17977	FBgn0040778		CG11761	FBgn0033528		CG15914	FBgn0030700		FBgn0028984			FBgn0035336
CG12770	FBgn0021814		CG7961	FBgn0025725		CG7108	FBgn0011762		FBgn0029092			FBgn0035770
CG6567	FBgn0037842		CG9630	FBgn0037561		CG5460	FBgn0001169		FBgn0029506			FBgn0035771
CG4882	FBgn0025336		CG33331	FBgn0067628		CG9209	FBgn0003969		FBgn0031313			FBgn0035936
CG9383	FBgn0029094		CG15437	FBgn0027609		CG6353	FBgn0038893		FBgn0031374			FBgn0036039
CG17712	FBgn0027597		CG7239	FBgn0031740		CG11399	FBgn0037021		FBgn0031384			FBgn0036043
CG13384	FBgn0032036		CG7748	FBgn0011336		CG5092	FBgn0021796		FBgn0031401			FBgn0036152
CG4535	FBgn0029174		CG10722	FBgn0032848		CG31692	FBgn0032820		FBgn0031474			FBgn0036237
CG15224	FBgn0000259		CG4710	FBgn0016926		CG32394	FBgn0261934		FBgn0031491			FBgn0036333
CG6666	FBgn0037873		CG18743	FBgn0013276		CG10874	FBgn0031395		FBgn0031703			FBgn0036689
CG3566	FBgn0029854		CG3353	FBgn0038869		CG1651	FBgn0011747		FBgn0031738			FBgn0036816
CG8080	FBgn0033373		CG5923	FBgn0005696		CG10222	FBgn0036356		FBgn0031741			FBgn0037239
CG15524	FBgn0039731		CG11200	FBgn0034500		CG32756	FBgn0052756		FBgn0031779			FBgn0037592
CG6308	FBgn0030645		CG10309	FBgn0038418		CG8567	FBgn0013799		FBgn0031895			FBgn0037643
CG8142	FBgn0030871		CG11680	FBgn0002774		CG9005	FBgn0033638		FBgn0032026			FBgn0037655
CG1333	FBgn0261274		CG11109	FBgn0037200		CG33956	FBgn0001297		FBgn0032029			FBgn0037756
CG2101	FBgn0035374		CG11495	FBgn0024194		CG1401	FBgn0039632		FBgn0032217			FBgn0037848
CG12708	FBgn0030666		CG17046	FBgn0001316		CG32067	FBgn0010762		FBgn0032262			FBgn0038035
CG11063	FBgn0030530		CG12010	FBgn0035443		CG1839	FBgn0030555		FBgn0032350			FBgn0038252
CG17737	FBgn0035423		CG8993	FBgn0035334		CG15312	FBgn0030174		FBgn0032453			FBgn0038256
CG13418	FBgn0038903		CG4886	FBgn0028382		CG17322	FBgn0027070		FBgn0032456			FBgn0038286
CG41556	FBgn0085687		CG10340	FBgn0022344		CG5605	FBgn0036974		FBgn0032587			FBgn0038438
CG17180	FBgn0035140		CG5837	FBgn0011771		CG9245	FBgn0030670		FBgn0032704			FBgn0038588
CG12065	FBgn0030052		CG3621	FBgn0025839		CG4389	FBgn0028479		FBgn0032748			FBgn0038721
CG11695	FBgn0030316		CG13598	FBgn0016754		CG12179	FBgn0025388		FBgn0032943			FBgn0038815
CG13088	FBgn0032047		CG6480	FBgn0036964		CG5077	FBgn0261550		FBgn0033095			FBgn0038965
CG10243	FBgn0033979		CG14232	FBgn0031061		CG11963	FBgn0037643		FBgn0033391			FBgn0039098
CG5613	FBgn0030839		CG8013	FBgn0020887		CG9320	FBgn0032882		FBgn0033635			FBgn0039637
CG9861	FBgn0034844		CG10379	FBgn0015513		CG14025	FBgn0000228		FBgn0033757			FBgn0039668
CG4334	FBgn0038312		CG9770	FBgn0086679		CG13120	FBgn0265001		FBgn0033761			FBgn0039972
CG9603	FBgn0040529		CG17183	FBgn0035149		CG10336	FBgn0032698		FBgn0033777			FBgn0040239
CG5874	FBgn0038872		CG14353	FBgn0036771		CG2264	FBgn0262169		FBgn0033836			FBgn0040823
CG15094	FBgn0034392		CG14199	FBgn0040890		CG12753	FBgn0038427		FBgn0033844			FBgn0040985
CG6612	FBgn0042094		CG31950	FBgn0051950		CG10395	FBgn0033019		FBgn0034025			FBgn0041111
CG7466	FBgn0031981		CG14413	FBgn0030572		CG9614	FBgn0003089		FBgn0034098			FBgn0041150
CG31873	FBgn0260750		CG15440	FBgn0031607		CG8290	FBgn0026573		FBgn0034371			FBgn0041582
CG3639	FBgn0031282		CG8954	FBgn0019890		CG9078	FBgn0001941		FBgn0034389			FBgn0042135
CG5285	FBgn0038490		CG9836	FBgn0037637		CG3004	FBgn0264691		FBgn0034491			FBgn0045063
CG12378	FBgn0038748		CG3764	FBgn0036684		CG8631	FBgn0002775		FBgn0034494			FBgn0051092
CG3460	FBgn0023542		CG2867	FBgn0004901		CG11804	FBgn0029092		FBgn0034570			FBgn0051875
CG9882	FBgn0034817		CG33232	FBgn0266696		CG6892	FBgn0039225		FBgn0034689			FBgn0052350
CG18317	FBgn0031359		CG1316	FBgn0035526		CG5482	FBgn0034368		FBgn0034733			FBgn0052365
CG3214	FBgn0031436		CG18528	FBgn0039189		CG2765	FBgn0035087		FBgn0034753			FBgn0052446
CG14931	FBgn0032374		CG3988	FBgn0028552		CG31633	FBgn0051633		FBgn0034962			FBgn0058006
CG1941	FBgn0033214		CG18174	FBgn0028694		CG3461	FBgn0003116		FBgn0035083			FBgn0066101
CG3271	FBgn0033088		CG4925	FBgn0036614		CG2698	FBgn0037536		FBgn0035166			FBgn0086676
CG8127	FBgn0000568		CG8331	FBgn0033906		CG1983	FBgn0039751		FBgn0035336			FBgn0260743
CG1345	FBgn0039580		CG1994	FBgn0027330		CG3705	FBgn0023129		FBgn0035440			FBgn0260960
CG4239	FBgn0030745		CG31648	FBgn0051648		CG7280	FBgn0030966		FBgn0035770			FBgn0261550
CG2972	FBgn0030177		CG3173	FBgn0034964		CG1718	FBgn0031170		FBgn0035771			FBgn0261698
CG4858	FBgn0037011		CG33122	FBgn0015376		CG14100	FBgn0036889		FBgn0035936			FBgn0261938
CG17684	FBgn0263780		CG7649	FBgn0265140		CG14879	FBgn0038419		FBgn0036039			FBgn0262103
CG5274	FBgn0036987		CG4143	FBgn0262732		CG7400	FBgn0267828		FBgn0036043			FBgn0262169
CG33056	FBgn0053056		CG32434	FBgn0026179		CG9491	FBgn0265778		FBgn0036152			FBgn0264307
CG15653	FBgn0034578		CG2182	FBgn0037360		CG31999	FBgn0051999		FBgn0036199			FBgn0264747
CG9193	FBgn0005655		CG10042	FBgn0038016		CG10215	FBgn0028434		FBgn0036237			FBgn0266084
CG11883	FBgn0033538		CG12284	FBgn0260635		CG10072	FBgn0261445		FBgn0036333			FBgn0285913
CG1774	FBgn0039856		CG8097	FBgn0030660		CG9659	FBgn0001404		FBgn0036689
CG1501	FBgn0003950		CG12004	FBgn0035236		CG31324	FBgn0051324		FBgn0036816
CG7671	FBgn0038609		CG3710	FBgn0010422		CG3407	FBgn0031573		FBgn0036887
CG14815	FBgn0023516		CG10539	FBgn0283472		CG2830	FBgn0011244		FBgn0037239
CG17840	FBgn0031611		CG11154	FBgn0010217		CG2747	FBgn0037541		FBgn0037592
CG3766	FBgn0011232		CG7988	FBgn0038582		CG11755	FBgn0037611		FBgn0037617
CG13941	FBgn0033928		CG12975	FBgn0037061		CG10107	FBgn0035713		FBgn0037636
CG6163	FBgn0036155		CG8445	FBgn0262166		CG17723	FBgn0035432		FBgn0037643
CG5344	FBgn0037917		CG15602	FBgn0030694		CG14945	FBgn0032402		FBgn0037655
CG13176	FBgn0033692		CG14040	FBgn0031676		CG15536	FBgn0039766		FBgn0037664
CG3539	FBgn0264978		CG10249	FBgn0027596		CG16807	FBgn0036621		FBgn0037756
CG9752	FBgn0034614		CG8315	FBgn0034058		CG32350	FBgn0052350		FBgn0037838
CG5140	FBgn0034314		CG2448	FBgn0030327		CG32264	FBgn0052264		FBgn0037844
CG32250	FBgn0052250		CG11859	FBgn0039306		CG14781	FBgn0260986		FBgn0037848
CG11238	FBgn0010830		CG7841	FBgn0036502		CG11207	FBgn0030241		FBgn0038035
CG2543	FBgn0030407		CG12156	FBgn0029959		CG4025	FBgn0025624		FBgn0038243
CG17715	FBgn0041004		CG32743	FBgn0263968		CG7985	FBgn0028499		FBgn0038252
CG4654	FBgn0011763		CG12241	FBgn0038304		CG8156	FBgn0013750		FBgn0038256
CG11964	FBgn0037644		CG34413	FBgn0085442		CG4852	FBgn0029121		FBgn0038286
CG9606	FBgn0030789		CG6459	FBgn0034259		CG5473	FBgn0034371		FBgn0038438
CG7404	FBgn0035849		CG12273	FBgn0016762		CG17332	FBgn0027779		FBgn0038588
CG5575	FBgn0011236		CG33052	FBgn0053052		CG34120	FBgn0083956		FBgn0038721
CG1644	FBgn0031182		CG4593	FBgn0029929		CG4057	FBgn0041582		FBgn0038815
CG32711	FBgn0262976		CG10061	FBgn0011020		CG8790	FBgn0027610		FBgn0038965
CG17611	FBgn0034915		CG4276	FBgn0029095		CG12413	FBgn0039588		FBgn0039098
CG1827	FBgn0037263		CG3194	FBgn0033087		CG7925	FBgn0003714		FBgn0039207
CG1827	FBgn0033431		CG9344	FBgn0034564		CG11790	FBgn0039265		FBgn0039637
CG6719	FBgn0264694		CG10913	FBgn0028983		CG7029	FBgn0039026		FBgn0039668
CG11907	FBgn0031250		CG2009	FBgn0026262		CG33523	FBgn0053523		FBgn0039972
CG11000	FBgn0263353		CG11866	FBgn0033486		CG12864	FBgn0026427		FBgn0040239
CG7339	FBgn0036188		CG4279	FBgn0261067		CG9218	FBgn0003435		FBgn0040823
CG2909	FBgn0030189		CG5429	FBgn0264325		CG5206	FBgn0023097		FBgn0040985
CG1844	FBgn0030350		CG17360	FBgn0037949		CG17697	FBgn0001085		FBgn0041111
CG6792	FBgn0032401		CG5690	FBgn0035295		CG7846	FBgn0030877		FBgn0041150
CG2917	FBgn0023181		CG5695	FBgn0011225		CG1738	FBgn0030291		FBgn0041582
CG12845	FBgn0033127		CG4560	FBgn0038369		CG11897	FBgn0039644		FBgn0041604
CG17567	FBgn0267726		CG5841	FBgn0263601		CG16787	FBgn0034940		FBgn0042135
CG17567	FBgn0040994		CG8134	FBgn0030671		CG18734	FBgn0004598		FBgn0042174
CG11154	FBgn0010217		CG7656	FBgn0036516		CG6899	FBgn0004368		FBgn0042185
CG11330	FBgn0000351		CG11597	FBgn0036212		CG11371	FBgn0067779		FBgn0045063
CG6692	FBgn0013770		CG5434	FBgn0038810		CG17462	FBgn0039251		FBgn0050467
CG6860	FBgn0032633		CG7266	FBgn0000565		CG7460	FBgn0036749		FBgn0051092
CG11876	FBgn0039635		CG17035	FBgn0036545		CG2711	FBgn0000520		FBgn0051163
CG6428	FBgn0029689		CG2275	FBgn0001291		CG9042	FBgn0001128		FBgn0051755
CG4050	FBgn0020312		CG6889	FBgn0040071		CG8889	FBgn0259985		FBgn0051875
CG10580	FBgn0011591		CG32443	FBgn0003042		CG4965	FBgn0002673		FBgn0052350
CG13213	FBgn0033609		CG13645	FBgn0039254		CG7138	FBgn0031951		FBgn0052365
CG31284	FBgn0260005		CG5733	FBgn0034310		CG10954	FBgn0032859		FBgn0052446
CG6103	FBgn0265784		CG3652	FBgn0031600		CG1814	FBgn0033426		FBgn0052451
CG17905	FBgn0032598		CG8114	FBgn0003041		CG5360	FBgn0261786		FBgn0052485
CG12099	FBgn0035232		CG1851	FBgn0026602		CG12050	FBgn0284251		FBgn0053230
CG7966	FBgn0038115		CG3424	FBgn0036007		CG8811	FBgn0033757		FBgn0058006
CG2129	FBgn0030008		CG8353	FBgn0032002		CG15345	FBgn0040928		FBgn0066101
CG34371	FBgn0085400		CG12189	FBgn0035150		CG8357	FBgn0024732		FBgn0087003
CG31045	FBgn0026059		CG1492	FBgn0030361		CG15072	FBgn0262103		FBgn0086254
CG2976	FBgn0031633		CG7698	FBgn0261065		CG4953	FBgn0032204		FBgn0086371
CG1467	FBgn0031106		CG18731	FBgn0042213		CG12253	FBgn0026148		FBgn0086676
CG8323	FBgn0033903		CG8454	FBgn0285911		CG5083	FBgn0038390		FBgn0086687
CG13775	FBgn0031874		CG2540	FBgn0030411		CG9018	FBgn0035318		FBgn0086711
CG5611	FBgn0039531		CG3400	FBgn0027621		CG7765	FBgn0001308		FBgn0250848
CG11482	FBgn0011659		CG7744	FBgn0034447		CG7753	FBgn0002716		FBgn0250850
CG4521	FBgn0030766		CG17187	FBgn0037882		CG9951	FBgn0036671		FBgn0260743
CG2961	FBgn0030187		CG18065	FBgn0034519		CG6169	FBgn0036534		FBgn0260866
CG5576	FBgn0013983		CG12001	FBgn0037265		CG32809	FBgn0023531		FBgn0260934
CG7914	FBgn0030995		CG13190	FBgn0260932		CG18011	FBgn0033491		FBgn0260941
CG14865	FBgn0011476		CG17077	FBgn0003118		CG12567	FBgn0039958		FBgn0260960
CG12788	FBgn0031041		CG8651	FBgn0003862		CG8472	FBgn0000253		FBgn0261550
CG31075	FBgn0051075		CG9267	FBgn0032524		CG5946	FBgn0036211		FBgn0261556
CG15117	FBgn0034417		CG6038	FBgn0036198		CG4062	FBgn0027079		FBgn0261698
CG31065	FBgn0051065		CG6284	FBgn0037802		CG5248	FBgn0020278		FBgn0261938
CG14131	FBgn0036205		CG11312	FBgn0011674		CG5190	FBgn0034351		FBgn0261987
CG10495	FBgn0032750		CG34150	FBgn0083986		CG3338	FBgn0031598		FBgn0262103
CG8980	FBgn0026402		CG10572	FBgn0015618		CG5144	FBgn0035957		FBgn0262169
CG4476	FBgn0035969		CG8325	FBgn0021847		CG12737	FBgn0025864		FBgn0262473
CG1131	FBgn0015569		CG13827	FBgn0039068		CG9795	FBgn0037234		FBgn0262737
CG8159	FBgn0037619		CG2863	FBgn0021874		CG4080	FBgn0035983		FBgn0263006
CG6338	FBgn0004510		CG8363	FBgn0020389		CG14211	FBgn0031044		FBgn0263397
CG4560	FBgn0038369		CG13779	FBgn0266666		CG14834	FBgn0035768		FBgn0264307
CG10463	FBgn0032819		CG3862	FBgn0031286		CG32195	FBgn0052195		FBgn0264747
CG17209	FBgn0030687		CG11170	FBgn0034705		CG6542	FBgn0027506		FBgn0264979
CG8003	FBgn0036096		CG3033	FBgn0029818		CG1981	FBgn0026869		FBgn0266084
CG15611	FBgn0034194		CG2977	FBgn0027106		CG6171	FBgn0026737		FBgn0283500
CG7507	FBgn0261797		CG9588	FBgn0038166		CG10221	FBgn0028475		FBgn0285913
CG17801	FBgn0038550		CG8707	FBgn0033272		CG3954	FBgn0000382
CG3803	FBgn0034938		CG4646	FBgn0033810		CG3838	FBgn0032130
CG10861	FBgn0036255		CG1101	FBgn0010774		CG1081	FBgn0041191
CG13645	FBgn0039254		CG9786	FBgn0001180		CG12157	FBgn0016041
CG13277	FBgn0261068		CG13472	FBgn0036450		CG8402	FBgn0005777
CG9262	FBgn0005564		CG17202	FBgn0038043		CG10997	FBgn0030529
CG12236	FBgn0029822		CG3689	FBgn0035987		CG4338	FBgn0038313
CG33488	FBgn0067782		CG8272	FBgn0033337		CG2174	FBgn0263705
CG5001	FBgn0031322		CG32486	FBgn0266918		CG17223	FBgn0031491
CG15812	FBgn0035405		CG4603	FBgn0035593		CG2845	FBgn0003079
CG1818	FBgn0033428		CG9775	FBgn0037261		CG31716	FBgn0051716
CG7770	FBgn0036918		CG14711	FBgn0037922		CG17328	FBgn0028895
CG5591	FBgn0263667		CG30421	FBgn0050421		CG7185	FBgn0035872
CG18596	FBgn0038953		CG3500	FBgn0034849		CG32016	FBgn0052016
CG30466	FBgn0050466		CG18466	FBgn0010222		CG9117	FBgn0031766
CG13348	FBgn0275436		CG18445	FBgn0033476		CG6144	FBgn0032259
CG5932	FBgn0036996		CG3036	FBgn0031645		CG31534	FBgn0263346
CG31868	FBgn0032330		CG3041	FBgn0015270		CG3238	FBgn0031540
CG17233	FBgn0036958		CG5846	FBgn0032171		CG6058	FBgn0000064
CG5495	FBgn0035631		CG33526	FBgn0053526		CG10198	FBgn0039120
CG4457	FBgn0015298		CG7637	FBgn0033548		CG4365	FBgn0037024
CG33169	FBgn0053169		CG9996	FBgn0039273		CG6479	FBgn0036710
CG3368	FBgn0039508		CG15618	FBgn0031077		CG40378	FBgn0267428
CG34116	FBgn0083952		CG18156	FBgn0035725		CG10638	FBgn0036290
CG13766	FBgn0031834		CG3457	FBgn0024984		CG1826	FBgn0030228
CG5292	FBgn0038491		CG1071	FBgn0024371		CG6072	FBgn0086370
CG6854	FBgn0266452		CG5989	FBgn0017429		CG10543	FBgn0034570
CG6854	FBgn0266441		CG12375	FBgn0031987		CG8485	FBgn0033915
CG9528	FBgn0031814		CG7112	FBgn0035879		CG34341	FBgn0085370
CG9985	FBgn0016984		CG5524	FBgn0266282		CG7220	FBgn0033544
CG4291	FBgn0031287		CG8964	FBgn0267728		CG13442	FBgn0034546
CG4957	FBgn0032205		CG3260	FBgn0021875		CG31908	FBgn0051908
CG4195	FBgn0002283		CG9938	FBgn0030500		CG12325	FBgn0033557
CG32068	FBgn0052068		CG12972	FBgn0037076		CG3488	FBgn0014906
CG7169	FBgn0037105		CG11882	FBgn0039642		CG2078	FBgn0033402
CG5114	FBgn0036460		CG7364	FBgn0028541		CG31145	FBgn0051145
CG1973	FBgn0260990		CG16717	FBgn0036028		CG4488	FBgn0011737
CG3905	FBgn0265623		CG3711	FBgn0040344		CG1841	FBgn0030330
CG5976	FBgn0036999		CG9203	FBgn0267977		CG1817	FBgn0004370
CG14777	FBgn0026872		CG3931	FBgn0034879		CG3532	FBgn0037979
CG2162	FBgn0035388		CG4065	FBgn0034982		CG17484	FBgn0260799
CG9613	FBgn0037574		CG4449	FBgn0039065		CG18405	FBgn0011259
CG4917	FBgn0039003		CG12936	FBgn0033549		CG31072	FBgn0051072
CG16935	FBgn0033883		CG10334	FBgn0005672		CG1505	FBgn0000808
CG14080	FBgn0036844		CG2937	FBgn0031639		CG5508	FBgn0027579
CG1890	FBgn0039869		CG12131	FBgn0027619		CG7736	FBgn0037084
CG31249	FBgn0051249		CG34039	FBgn0054039		CG3634	FBgn0037026
CG1360	FBgn0033195		CG16969	FBgn0032390		CG8599	FBgn0003598
CG32228	FBgn0052228		CG16758	FBgn0035348		CG11141	FBgn0033177
CG32534	FBgn0261573		CG8862	FBgn0033690		CG4553	FBgn0039336
CG5044	FBgn0038326		CG4679	FBgn0033816		CG5771	FBgn0015790
CG33520	FBgn0263738		CG8616	FBgn0261111		CG33214	FBgn0264561
CG33520	FBgn0263757		CG5669	FBgn0039169		CG5151	FBgn0036576
CG12159	FBgn0033232		CG10318	FBgn0034650		CG8548	FBgn0024889
CG10184	FBgn0039094		CG10516	FBgn0036549		CG3166	FBgn0000097
CG13786	FBgn0031900		CG9933	FBgn0028965		CG4376	FBgn0000667
CG10089	FBgn0036369		CG5933	FBgn0039139		CG4583	FBgn0261984
CG5056	FBgn0032231		CG33228	FBgn0261373		CG1009	FBgn0261243
CG9298	FBgn0260861		CG9841	FBgn0034627		CG17436	FBgn0260987
CG3054	FBgn0022153		CG6502	FBgn0000629		CG10535	FBgn0037926
CG10286	FBgn0037439		CG10130	FBgn0010638		CG8318	FBgn0015269
CG8536	FBgn0027538		CG10414	FBgn0032691		CG8771	FBgn0033766
CG3709	FBgn0031227		CG32177	FBgn0052177		CG9007	FBgn0036398
CG2196	FBgn0039872		CG13367	FBgn0025634		CG7996	FBgn0003450
CG14887	FBgn0004087		CG10166	FBgn0032799		CG10646	FBgn0036292
CG11839	FBgn0039271		CG13329	FBgn0040477		CG2604	FBgn0037298
CG8320	FBgn0034059		CG3781	FBgn0029853		CG6115	FBgn0040985
CG10363	FBgn0041180		CG5373	FBgn0015277		CG7192	FBgn0030894
CG13604	FBgn0039137		CG10908	FBgn0267972		CG32562	FBgn0028974
CG3967	FBgn0035989		CG14482	FBgn0034245		CG14716	FBgn0037933
CG6757	FBgn0040475		CG12151	FBgn0029958		CG40351	FBgn0040022
CG13550	FBgn0034853		CG12795	FBgn0031535		CG3225	FBgn0031631
CG13390	FBgn0032031		CG6019	FBgn0002905		CG7147	FBgn0259984
CG8395	FBgn0034065		CG5479	FBgn0034893		CG33499	FBgn0053499
CG13776	FBgn0263027		CG8648	FBgn0025832		CG31092	FBgn0051092
CG13776	FBgn0263026		CG6451	FBgn0283709		CG5969	FBgn0036998
CG9547	FBgn0031824		CG6451	FBgn0283503		CG12012	FBgn0035444
CG17061	FBgn0035132		CG5196	FBgn0038039		CG1322	FBgn0004606
CG7429	FBgn0031979		CG12072	FBgn0011739		CG4012	FBgn0023081
CG10245	FBgn0033980		CG17320	FBgn0015808		CG14312	FBgn0038596
CG3165	FBgn0031484		CG8281	FBgn0035824		CG17257	FBgn0031495
CG18853	FBgn0042173		CG17343	FBgn0032751		CG9638	FBgn0037555
CG4180	FBgn0001977		CG12149	FBgn0040234		CG7628	FBgn0260795
CG32488	FBgn0052488		CG9256	FBgn0040297		CG6151	FBgn0261722
CG3940	FBgn0037788		CG2945	FBgn0000316		CG17256	FBgn0029970
CG7175	FBgn0038584		CG9215	FBgn0030659		CG32262	FBgn0052262
CG7441	FBgn0036763		CG6155	FBgn0014877		CG4091	FBgn0034894
CG3419	FBgn0266438		CG8135	FBgn0037689		CG7207	FBgn0027569
CG3419	FBgn0266439		CG9035	FBgn0021795		CG6391	FBgn0036111
CG31922	FBgn0051922		CG4742	FBgn0030786		CG7458	FBgn0037144
CG4842	FBgn0036620		CG13018	FBgn0040751		CG8594	FBgn0033755
CG10642	FBgn0004380		CG5186	FBgn0261477		CG32697	FBgn0028341
CG5546	FBgn0036761		CG7670	FBgn0038608		CG6016	FBgn0033844
CG6983	FBgn0035896		CG18627	FBgn0028970		CG10847	FBgn0004875
CG7287	FBgn0020645		CG8714	FBgn0028563		CG1664	FBgn0003321
CG1663	FBgn0033449		CG16785	FBgn0027343		CG4699	FBgn0262527
CG6827	FBgn0013997		CG1239	FBgn0037368		CG6192	FBgn0032341
CG7578	FBgn0028538		CG15871	FBgn0030552		CG2187	FBgn0017448
CG8132	FBgn0037687		CG3949	FBgn0015393		CG9183	FBgn0003114
CG6205	FBgn0004957		CG17515	FBgn0039966		CG17270	FBgn0038828
CG31373	FBgn0051373		CG1598	FBgn0033191		CG5521	FBgn0039466
CG5018	FBgn0263605		CG12235	FBgn0031050		CG32000	FBgn0052000
CG8206	FBgn0030679		CG13014	FBgn0030759		CG9381	FBgn0037705
CG9257	FBgn0032916		CG3423	FBgn0020616		CG7830	FBgn0032015
CG9958	FBgn0031455		CG8388	FBgn0034062		CG5940	FBgn0000404
CG9125	FBgn0030793		CG9609	FBgn0030787		CG5686	FBgn0024248
CG12202	FBgn0031020		CG12016	FBgn0035436		CG3953	FBgn0086359
CG17753	FBgn0010531		CG10234	FBgn0024230		CG6734	FBgn0032395
CG6116	FBgn0032499		CG12170	FBgn0037356		CG5067	FBgn0262582
CG12007	FBgn0037293		CG3346	FBgn0025739		CG10955	FBgn0034722
CG12164	FBgn0033158		CG8198	FBgn0026666		CG2304	FBgn0039668
CG4252	FBgn0004367		CG4448	FBgn0039067		CG31195	FBgn0051195
CG4645	FBgn0030435		CG34231	FBgn0085260		CG9947	FBgn0030752
CG12410	FBgn0000394		CG3857	FBgn0023520		CG8195	FBgn0034032
CG6928	FBgn0036240		CG13391	FBgn0027094		CG1957	FBgn0027873
CG5224	FBgn0034354		CG13567	FBgn0034963		CG13803	FBgn0264002
CG3433	FBgn0021944		CG15523	FBgn0039727		CG8507	FBgn0037756
CG2708	FBgn0010812		CG15415	FBgn0031549		CG8169	FBgn0011660
CG32721	FBgn0027553		CG31392	FBgn0261679		CG10119	FBgn0010397
CG31126	FBgn0051126		CG31392	FBgn0261680		CG33330	FBgn0263929
CG7386	FBgn0035691		CG7636	FBgn0036135		CG31661	FBgn0051661
CG5269	FBgn0267975		CG5085	FBgn0038788		CG6982	FBgn0266409
CG3756	FBgn0031657		CG15916	FBgn0030704		CG11173	FBgn0034913
CG13204	FBgn0033627		CG1655	FBgn0030242		CG7616	FBgn0036142
CG4570	FBgn0037844		CG4676	FBgn0033815		CG5484	FBgn0039450
CG3209	FBgn0034971		CG3298	FBgn0028426		CG18767	FBgn0042112
CG16986	FBgn0035356		CG13623	FBgn0039205		CG33635	FBgn0053635
CG11539	FBgn0039859		CG7852	FBgn0035229		CG4994	FBgn0026409
CG8709	FBgn0263593		CG10109	FBgn0267824		CG17492	FBgn0086442
CG9243	FBgn0263050		CG10109	FBgn0267825		CG3991	FBgn0020370
CG9243	FBgn0263051		CG32174	FBgn0052174		CG8948	FBgn0030685
CG16890	FBgn0028932		CG4103	FBgn0283659		CG14960	FBgn0035428
CG6608	FBgn0037852		CG11887	FBgn0033540		CG32133	FBgn0052133
CG10092	FBgn0037526		CG6094	FBgn0032261		CG4711	FBgn0267347
CG13888	FBgn0035167		CG11130	FBgn0020909		CG5730	FBgn0000083
CG8676	FBgn0261239		CG4170	FBgn0024183		CG41099	FBgn0039955
CG4496	FBgn0031894		CG32856	FBgn0052856		CG1742	FBgn0025814
CG4533	FBgn0011296		CG3792	FBgn0031662		CG11518	FBgn0043900
CG2471	FBgn0030357		CG10695	FBgn0029878		CG5634	FBgn0039528
CG5721	FBgn0034315		CG6618	FBgn0029137		CG14162	FBgn0040823
CG6939	FBgn0025802		CG3187	FBgn0029783		CG15706	FBgn0034093
CG12769	FBgn0033252		CG13912	FBgn0035186		CG12113	FBgn0026679
CG15816	FBgn0261570		CG13295	FBgn0035674		CG13887	FBgn0035165
CG33506	FBgn0053506		CG5949	FBgn0263600		CG11856	FBgn0039302
CG6195	FBgn0038723		CG9159	FBgn0266449		CG18642	FBgn0025109
CG17065	FBgn0031099		CG14543	FBgn0039404		CG2060	FBgn0014469
CG9065	FBgn0030610		CG10582	FBgn0028402		CG12052	FBgn0283521
CG31618	FBgn0051618		CG6057	FBgn0040283		CG6725	FBgn0040271
CG5167	FBgn0038038		CG18190	FBgn0034403		CG15386	FBgn0040715
CG11783	FBgn0015240		CG12292	FBgn0032451		CG11508	FBgn0260398
CG2684	FBgn0002542		CG4589	FBgn0284252		CG12520	FBgn0036324
CG7435	FBgn0004908		CG6965	FBgn0037960		CG2899	FBgn0015402
CG8995	FBgn0030695		CG7130	FBgn0037151		CG8766	FBgn0026619
CG11377	FBgn0031217		CG4896	FBgn0031319		CG5284	FBgn0036566
CG4336	FBgn0003302		CG1406	FBgn0033210		CG11248	FBgn0037117
CG8366	FBgn0034054		CG17660	FBgn0031356		CG31683	FBgn0051683
CG11448	FBgn0024985		CG10948	FBgn0036317		CG9764	FBgn0004049
CG14001	FBgn0043362		CG31040	FBgn0051040		CG1554	FBgn0003277
CG32100	FBgn0052100		CG9378	FBgn0014023		CG3268	FBgn0028579
CG2412	FBgn0033389		CG7793	FBgn0001965		CG10431	FBgn0032730
CG15922	FBgn0040575		CG2098	FBgn0266268		CG3653	FBgn0028369
CG9922	FBgn0038196		CG7957	FBgn0038578		CG3077	FBgn0031457
CG3715	FBgn0015296		CG13922	FBgn0035272		CG9327	FBgn0261394
CG10246	FBgn0013771		CG9746	FBgn0260935		CG6000	FBgn0039145
CG5118	FBgn0031317		CG4074	FBgn0037017		CG8042	FBgn0027554
CG6920	FBgn0002906		CG13322	FBgn0033784		CG3342	FBgn0029874
CG9510	FBgn0032076		CG12091	FBgn0035228		CG10971	FBgn0036309
CG8491	FBgn0001324		CG9424	FBgn0037719		CG17998	FBgn0261988
CG12690	FBgn0029504		CG8174	FBgn0026370		CG18145	FBgn0032189
CG9531	FBgn0031817		CG10949	FBgn0032858		CG10632	FBgn0036302
CG11246	FBgn0037121		CG5382	FBgn0038950		CG8152	FBgn0034008
CG14767	FBgn0040777		CG7544	FBgn0033994		CG11324	FBgn0025777
CG30401	FBgn0050401		CG18801	FBgn0041627		CG12124	FBgn0260789
CG11122	FBgn0030266		CG8251	FBgn0003074		CG8601	FBgn0002909
CG5116	FBgn0039339		CG2046	FBgn0037378		CG7328	FBgn0036942
CG12019	FBgn0011573		CG1671	FBgn0033454		CG13852	FBgn0038965
CG6233	FBgn0036136		CG15889	FBgn0038128		CG4768	FBgn0030790
CG32212	FBgn0052212		CG10153	FBgn0266723		CG13401	FBgn0027780
CG33170	FBgn0053170		CG8396	FBgn0015299		CG7904	FBgn0003169
CG3529	FBgn0035995		CG5618	FBgn0036975		CG17665	FBgn0262117
CG13676	FBgn0035844		CG7062	FBgn0015793		CG1371	FBgn0033482
CG2889	FBgn0030206		CG34001	FBgn0054001		CG32435	FBgn0021760
CG10241	FBgn0015714		CG10575	FBgn0035632		CG12233	FBgn0027291
CG11593	FBgn0035488		CG8434	FBgn0034083		CG3443	FBgn0003048
CG10445	FBgn0037531		CG7057	FBgn0263351		CG11120	FBgn0039250
CG13761	FBgn0011566		CG1233	FBgn0035137		CG12162	FBgn0037329
CG4963	FBgn0039561		CG5848	FBgn0000250		CG14213	FBgn0031047
CG7749	FBgn0261574		CG10289	FBgn0035688		CG3073	FBgn0027296
CG17803	FBgn0038547		CG10922	FBgn0011638		CG14906	FBgn0015351
CG7134	FBgn0031952		CG3184	FBgn0029892		CG6796	FBgn0034177
CG11205	FBgn0003082		CG3184	FBgn0265362		CG3848	FBgn0023518
CG3977	FBgn0062413		CG13867	FBgn0034503		CG8824	FBgn0045063
CG32597	FBgn0040153		CG6340	FBgn0030648		CG12714	FBgn0263005
CG11759	FBgn0028421		CG13037	FBgn0260460		CG3125	FBgn0261383
CG3760	FBgn0022343		CG13037	FBgn0053257		CG11984	FBgn0037655
CG12123	FBgn0030039		CG12333	FBgn0038617		CG9696	FBgn0020306
CG1628	FBgn0030218		CG18217	FBgn0036646		CG2864	FBgn0023216
CG6937	FBgn0038989		CG5378	FBgn0028688		CG40006	FBgn0058006
CG10728	FBgn0003978					CG5020	FBgn0020503
CG3691	FBgn0035047					CG13822	FBgn0039098
CG6754	FBgn0261530					CG5087	FBgn0035953
CG5414	FBgn0036569					CG7610	FBgn0020235
CG12176	FBgn0030506					CG6522	FBgn0034223
CG7655	FBgn0038536					CG13879	FBgn0035120
CG8288	FBgn0030686					CG6420	FBgn0039451
CG14701	FBgn0037883					CG15356	FBgn0031377
CG4908	FBgn0032195					CG8538	FBgn0038223
CG6264	FBgn0040238					CG3299	FBgn0004397
CG5501	FBgn0039157					CG5112	FBgn0039341
CG5215	FBgn0263603					CG15087	FBgn0034380
CG8360	FBgn0032001					CG9131	FBgn0029161
CG13688	FBgn0031267					CG9712	FBgn0036666
CG7685	FBgn0038619					CG6406	FBgn0034269
CG30169	FBgn0050169					CG1848	FBgn0283712
CG30185	FBgn0050185					CG6695	FBgn0039215
CG8920	FBgn0027529					CG5664	FBgn0037082
CG5060	FBgn0262582					CG8176	FBgn0037702
CG9155	FBgn0010246					CG12532	FBgn0010380
CG8818	FBgn0033751					CG6985	FBgn0039017
CG6630	FBgn0260486					CG12141	FBgn0027084
CG18012	FBgn0038552					CG3707	FBgn0004655
CG10159	FBgn0015602					CG15436	FBgn0031610
CG17754	FBgn0030114					CG6477	FBgn0034249
CG6414	FBgn0029690					CG10777	FBgn0029979
CG12077	FBgn0035435					CG7352	FBgn0037581
CG7122	FBgn0030893					CG17272	FBgn0038830
CG9012	FBgn0000319					CG8171	FBgn0000996
CG18505	FBgn0038363					CG17818	FBgn0027872
CG7420	FBgn0031344					CG12207	FBgn0285913
CG4168	FBgn0028888					CG9527	FBgn0031813
CG12821	FBgn0040780					CG2608	FBgn0032870
CG6661	FBgn0036403					CG4854	FBgn0038766
CG16880	FBgn0001967					CG3680	FBgn0037027
CG11466	FBgn0038037					CG41284	FBgn0085599
CG12254	FBgn0038760					CG32425	FBgn0052425
CG6758	FBgn0034704					CG15817	FBgn0028476
CG6098	FBgn0010398					CG9205	FBgn0035181
CG31278	FBgn0051278					CG3800	FBgn0034802
CG4539	FBgn0010520					CG4059	FBgn0001078
CG8060	FBgn0034113					CG5741	FBgn0264307
CG5798	FBgn0038862					CG5741	FBgn0264305
CG12106	FBgn0030100					CG7379	FBgn0038546
CG1762	FBgn0010395					CG31151	FBgn0051151
CG5497	FBgn0034361					CG2929	FBgn0037339
CG13919	FBgn0035248					CG11504	FBgn0039733
CG8816	FBgn0033754					CG6120	FBgn0027865
CG15254	FBgn0028949					CG6850	FBgn0014075
CG13784	FBgn0031897					CG7650	FBgn0036519
CG31548	FBgn0051548					CG12367	FBgn0033686
CG2160	FBgn0033266					CG5191	FBgn0038803
CG10585	FBgn0037044					CG6878	FBgn0036488
CG11877	FBgn0039636					CG16940	FBgn0035111
CG17642	FBgn0031357					CG33181	FBgn0053181
CG7565	FBgn0035833					CG11417	FBgn0024364
CG3663	FBgn0035044					CG32484	FBgn0052484
CG31630	FBgn0262872					CG5535	FBgn0036764
CG7034	FBgn0266674					CG14408	FBgn0030581
CG6401	FBgn0034270					CG4016	FBgn0086532
CG3114	FBgn0005427					CG32454	FBgn0260481
CG5730	FBgn0000083					CG3895	FBgn0004860
CG9323	FBgn0032883					CG4606	FBgn0026616
CG1349	FBgn0039802					CG10602	FBgn0032721
CG31122	FBgn0051122					CG10602	FBgn0032720
CG12338	FBgn0033543					CG4557	FBgn0029912
CG6318	FBgn0030931					CG1785	FBgn0030061
CG7556	FBgn0030990					CG8092	FBgn0033998
CG18048	FBgn0037435					CG1074	FBgn0037250
CG11076	FBgn0039929					CG7595	FBgn0000317
CG6204	FBgn0039165					CG33967	FBgn0262127
CG1320	FBgn0035335					CG9379	FBgn0000244
CG30183	FBgn0050183					CG18279	FBgn0283462
CG9211	FBgn0031872					CG6357	FBgn0033875
CG10718	FBgn0004374					CG11814	FBgn0265988
CG8500	FBgn0037754					CG30388	FBgn0034590
CG6126	FBgn0038407					CG14998	FBgn0264693
CG13671	FBgn0035867					CG34421	FBgn0085450
CG8487	FBgn0264560					CG6701	FBgn0033889
CG10489	FBgn0035644					CG4574	FBgn0004611
CG33057	FBgn0053057					CG2076	FBgn0030263
CG30338	FBgn0050338					CG34407	FBgn0085436
CG13771	FBgn0031844					CG7020	FBgn0024806
CG1271	FBgn0035392					CG2272	FBgn0030018
CG3523	FBgn0283427					CG9336	FBgn0032897
CG34123	FBgn0265194					CG11278	FBgn0036341
CG12373	FBgn0026741					CG2678	FBgn0014931
CG2321	FBgn0039663					CG11488	FBgn0031231
CG14666	FBgn0037307					CG9552	FBgn0011705
CG8322	FBgn0020236					CG6439	FBgn0038922
CG9674	FBgn0036663					CG1484	FBgn0000709
CG8526	FBgn0037759					CG7861	FBgn0033055
CG2200	FBgn0030447					CG7039	FBgn0030088
CG8431	FBgn0027091					CG15912	FBgn0029712
CG2952	FBgn0261363					CG3876	FBgn0031284
CG5008	FBgn0040321					CG12317	FBgn0028425
CG10206	FBgn0026196					CG3842	FBgn0029866
CG4789	FBgn0030792					CG5675	FBgn0026313
CG10303	FBgn0037412					CG11723	FBgn0031391
CG13001	FBgn0030806					CG40191	FBgn0058191
CG4665	FBgn0035964					CG9485	FBgn0034618
CG4181	FBgn0010038					CG14030	FBgn0031696
CG2987	FBgn0029105					CG5323	FBgn0034362
CG6292	FBgn0025455					CG3632	FBgn0030735
CG3568	FBgn0029710					CG8079	FBgn0034002
CG17266	FBgn0033089					CG6876	FBgn0036487
CG6776	FBgn0035904					CG3719	FBgn0024986
CG33525	FBgn0261573					CG9727	FBgn0037445
CG2906	FBgn0033240					CG16837	FBgn0035009
CG3630	FBgn0023540					CG1341	FBgn0028687
CG9852	FBgn0010340					CG9953	FBgn0035726
CG31743	FBgn0032618					CG12938	FBgn0033554
CG15019	FBgn0035541					CG15162	FBgn0032694
CG8235	FBgn0033351					CG18402	FBgn0283499
CG17167	FBgn0039941					CG12582	FBgn0037215
CG5194	FBgn0035955					CG17446	FBgn0030121
CG6340	FBgn0030648					CG32039	FBgn0052039
CG1319	FBgn0035529					CG40068	FBgn0058068
CG9200	FBgn0031876					CG1453	FBgn0030268
CG7745	FBgn0033616					CG1453	FBgn0031950
CG1414	FBgn0024251					CG2530	FBgn0010313
						CG5547	FBgn0032482
						CG2702	FBgn0037540
						CG12359	FBgn0027603
						CG7154	FBgn0031947
						CG12021	FBgn0067864
						CG3525	FBgn0000536
						CG1692	FBgn0002641
						CG15697	FBgn0038834
						CG3920	FBgn0021800
						CG8679	FBgn0032934
						CG2371	FBgn0030323
						CG11456	FBgn0037031
						CG11035	FBgn0037544
						CG32446	FBgn0052446
						CG14450	FBgn0037184
						CG8128	FBgn0030668
						CG9009	FBgn0027601
						CG17490	FBgn0040009
						CG7013	FBgn0027095
						CG14619	FBgn0031187
						CG1951	FBgn0039623
						CG1746	FBgn0039830
						CG10075	FBgn0035722
						CG9793	FBgn0037620
						CG9670	FBgn0028380
						CG12190	FBgn0034763
						CG17255	FBgn0261710
						CG3533	FBgn0004055
						CG12304	FBgn0036515
						CG5835	FBgn0038682
						CG10986	FBgn0001087
						CG1965	FBgn0037466
						CG13101	FBgn0032084
						CG3002	FBgn0030141
						CG5034	FBgn0032223
						CG11133	FBgn0037205
						CG15766	FBgn0029813
						CG3149	FBgn0027564
						CG11030	FBgn0031736
						CG11263	FBgn0036330
						CG9380	FBgn0035094
						CG1512	FBgn0032956
						CG9414	FBgn0028406
						CG15439	FBgn0031606
						CG11940	FBgn0261811
						CG8987	FBgn0004406
						CG3066	FBgn0037515
						CG1021	FBgn0037443
						CG2999	FBgn0025726
						CG11115	FBgn0037202
						CG11737	FBgn0037592
						CG18476	FBgn0037931
						CG7855	FBgn0038118
						CG5974	FBgn0010441
						CG11009	FBgn0036318
						CG1084	FBgn0037240
						CG11900	FBgn0039650
						CG3509	FBgn0038252
						CG6801	FBgn0011335
						CG5014	FBgn0029687
						CG10084	FBgn0002044
						CG6181	FBgn0283682
						CG6852	FBgn0036820
						CG17834	FBgn0028394
						CG13345	FBgn0086356
						CG7789	FBgn0039698
						CG3835	FBgn0023507
						CG6842	FBgn0283469
						CG17159	FBgn0039945
						CG14883	FBgn0038432
						CG7625	FBgn0028663
						CG17252	FBgn0026149
						CG7110	FBgn0032521
						CG5729	FBgn0027836
						CG10255	FBgn0033984
						CG12117	FBgn0014032
						CG12818	FBgn0037809
						CG8055	FBgn0086656
						CG6556	FBgn0021818
						CG3476	FBgn0031881
						CG13876	FBgn0035109
						CG5235	FBgn0036565
						CG10425	FBgn0039304
						CG6148	FBgn0016693
						CG9100	FBgn0031882
						CG5938	FBgn0046247
						CG1907	FBgn0039674
						CG4360	FBgn0038787
						CG4320	FBgn0029840
						CG4674	FBgn0037856
						CG32556	FBgn0263258
						CG16757	FBgn0010905
						CG16757	FBgn0260480
						CG10936	FBgn0034253
						CG3273	FBgn0013732
						CG30077	FBgn0050077
						CG10776	FBgn0024179
						CG7332	FBgn0030973
						CG31289	FBgn0024558
						CG10975	FBgn0014007
						CG31098	FBgn0051098
						CG4878	FBgn0034237
						CG4586	FBgn0029924
						CG15684	FBgn0261550
						CG2790	FBgn0027599
						CG10149	FBgn0028689
						CG5912	FBgn0000119
						CG1882	FBgn0033226
						CG8067	FBgn0033891
						CG4936	FBgn0038768
						CG14073	FBgn0036814
						CG8427	FBgn0023167
						CG8793	FBgn0260655
						CG7943	FBgn0039741
						CG11811	FBgn0036099
						CG5417	FBgn0038808
						CG3585	FBgn0023458
						CG8578	FBgn0030699
						CG15107	FBgn0041702
						CG11526	FBgn0035437
						CG17569	FBgn0035416
						CG31360	FBgn0051360
						CG33087	FBgn0053087
						CG1093	FBgn0261261
						CG2034	FBgn0015359
						CG11686	FBgn0040551
						CG12360	FBgn0283439
						CG12360	FBgn0283438
						CG11055	FBgn0034491
						CG17574	FBgn0033777
						CG6064	FBgn0036746
						CG6325	FBgn0037814
						CG8293	FBgn0015247
						CG32030	FBgn0266084
						CG5205	FBgn0038344
						CG3495	FBgn0267823
						CG33094	FBgn0053094
						CG8828	FBgn0033740
						CG8029	FBgn0262515
						CG5850	FBgn0032172
						CG11261	FBgn0036332
						CG8107	FBgn0025866
						CG3319	FBgn0263237
						CG5684	FBgn0036239
						CG18619	FBgn0032202
						CG13778	FBgn0031885
						CG30403	FBgn0050403
						CG2025	FBgn0030344
						CG11494	FBgn0263108
						CG4752	FBgn0034733
						CG3458	FBgn0026015
						CG5543	FBgn0034908
						CG17361	FBgn0036395
						CG3637	FBgn0025865
						CG7381	FBgn0038098
						CG8963	FBgn0034181
						CG3857	FBgn0023520
						CG4049	FBgn0034976
						CG5877	FBgn0030625
						CG11148	FBgn0039936
						CG5098	FBgn0034300
						CG10383	FBgn0032699
						CG3409	FBgn0033095
						CG5966	FBgn0029831
						CG9181	FBgn0267487
						CG2714	FBgn0000376
						CG2714	FBgn0000520
						CG9773	FBgn0037609
						CG11971	FBgn0260243
						CG5857	FBgn0039125
						CG1416	FBgn0032961
						CG3204	FBgn0283666
						CG2019	FBgn0029088
						CG6272	FBgn0036126
						CG5746	FBgn0039186
						CG10106	FBgn0029506
						CG32707	FBgn0052707
						CG14066	FBgn0261618
						CG10272	FBgn0264495
						CG32306	FBgn0266696
						CG31643	FBgn0051643
						CG3281	FBgn0260741
						CG5965	FBgn0010328
						CG4078	FBgn0029798
						CG14230	FBgn0031062
						CG5568	FBgn0035641
						CG31274	FBgn0051274
						CG17841	FBgn0028480
						CG5469	FBgn0034372
						CG7809	FBgn0036919
						CG6708	FBgn0020626
						CG10443	FBgn0000464
						CG7246	FBgn0030081
						CG4949	FBgn0030813
						CG7398	FBgn0024921
						CG11760	FBgn0037615
						CG9559	FBgn0000719
						CG7103	FBgn0030964
						CG16953	FBgn0038809
						CG34157	FBgn0260003
						CG11999	FBgn0037312
						CG6949	FBgn0263863
						CG1167	FBgn0003206
						CG31613	FBgn0051613
						CG7156	FBgn0038588
						CG6791	FBgn0037918
						CG1856	FBgn0003870
						CG3161	FBgn0262736
						CG10494	FBgn0034634
						CG32528	FBgn0052528
						CG3086	FBgn0013987
						CG34123	FBgn0265194
						CG4999	FBgn0035936
						CG5081	FBgn0267849
						CG10988	FBgn0001612
						CG18446	FBgn0033458
						CG7536	FBgn0030890
						CG9096	FBgn0010315
						CG17509	FBgn0260012
						CG14899	FBgn0038438
						CG5063	FBgn0038327
						CG12263	FBgn0034346
						CG13626	FBgn0039212
						CG6815	FBgn0040237
						CG8593	FBgn0019662
						CG1902	FBgn0033434
						CG12127	FBgn0000077
						CG8777	FBgn0033376
						CG4707	FBgn0035036
						CG3307	FBgn0011474
						CG3415	FBgn0030731
						CG7518	FBgn0038108
						CG7935	FBgn0026252
						CG3870	FBgn0015372
						CG17610	FBgn0001137
						CG6966	FBgn0038286
						CG11590	FBgn0030545
						CG13681	FBgn0262579
						CG6092	FBgn0028833
						CG11329	FBgn0031848
						CG9791	FBgn0037232
						CG1900	FBgn0030391
						CG4916	FBgn0004419
						CG7015	FBgn0263352
						CG1429	FBgn0011656
						CG8390	FBgn0259978
						CG14447	FBgn0029830
						CG10840	FBgn0026259
						CG16718	FBgn0038721
						CG8465	FBgn0028343
						CG42382	FBgn0259728
						CG11163	FBgn0025693
						CG5491	FBgn0039459
						CG10496	FBgn0034631
						CG8887	FBgn0005386
						CG4656	FBgn0039055
						CG3860	FBgn0034951
						CG1960	FBgn0002872
						CG17359	FBgn0036396
						CG7831	FBgn0002924
						CG7007	FBgn0028662
						CG6539	FBgn0011802
						CG5229	FBgn0028387
						CG3979	FBgn0036816
						CG4841	FBgn0261671
						CG12112	FBgn0030048
						CG8155	FBgn0034009
						CG11660	FBgn0036187
						CG5052	FBgn0003087
						CG9293	FBgn0032516
						CG7504	FBgn0035842
						CG34252	FBgn0264747
						CG34252	FBgn0264748
						CG34252	FBgn0264746
						CG5745	FBgn0038855
						CG12954	FBgn0034001
						CG30096	FBgn0050096
						CG3093	FBgn0000482
						CG3421	FBgn0038853
						CG32473	FBgn0052473
						CG18374	FBgn0025592
						CG4456	FBgn0001228
						CG8444	FBgn0037671
						CG12891	FBgn0261862
						CG17498	FBgn0035640
						CG4033	FBgn0003278
						CG7417	FBgn0086358
						CG30100	FBgn0050100
						CG7438	FBgn0086347
						CG5796	FBgn0020018
						CG32179	FBgn0052179
						CG14578	FBgn0260469
						CG10967	FBgn0260945
						CG7700	FBgn0044871
						CG1058	FBgn0022981
						CG5358	FBgn0037770
						CG16974	FBgn0032479
						CG4780	FBgn0260856
						CG5068	FBgn0035951
						CG31109	FBgn0051109
						CG6637	FBgn0260940
						CG14352	FBgn0031351
						CG8188	FBgn0030863
						CG9995	FBgn0027655
						CG6230	FBgn0027582
						CG5254	FBgn0040383
						CG18177	FBgn0036039
						CG6145	FBgn0033853
						CG14306	FBgn0263974
						CG8430	FBgn0001124
						CG34406	FBgn0264744
						CG34406	FBgn0264745
						CG12297	FBgn0038928
						CG7341	FBgn0036777
						CG6214	FBgn0032456
						CG2519	FBgn0037336
						CG6493	FBgn0034246
						CG2252	FBgn0004656
						CG5991	FBgn0026576
						CG17493	FBgn0040010
						CG3530	FBgn0028497
						CG6605	FBgn0000183
						CG2938	FBgn0029685
						CG30059	FBgn0260475
						CG17227	FBgn0038035
						CG3071	FBgn0023527
						CG7962	FBgn0010350
						CG8841	FBgn0033713
						CG12288	FBgn0032620
						CG3308	FBgn0038877
						CG5708	FBgn0032196
						CG3779	FBgn0002973
						CG7717	FBgn0024329
						CG9936	FBgn0003415
						CG33935	FBgn0028581
						CG2941	FBgn0029686
						CG10897	FBgn0033636
						CG6202	FBgn0019925
						CG12217	FBgn0003139
						CG9771	FBgn0040466
						CG6683	FBgn0035902
						CG32243	FBgn0052243
						CG5245	FBgn0038047
						CG4076	FBgn0036812
						CG1354	FBgn0030151
						CG34392	FBgn0085421
						CG16707	FBgn0045823
						CG7967	FBgn0035251
						CG7899	FBgn0000032
						CG31127	FBgn0046685
						CG32176	FBgn0052176
						CG5560	FBgn0030607
						CG4162	FBgn0002524
						CG6632	FBgn0030945
						CG1935	FBgn0025820
						CG1822	FBgn0014133
						CG32767	FBgn0052767
						CG31729	FBgn0051729
						CG11753	FBgn0037603
						CG7430	FBgn0036762
						CG17294	FBgn0032032
						CG9004	FBgn0035336
						CG7384	FBgn0032262
						CG1241	FBgn0044452
						CG5709	FBgn0025186
						CG10882	FBgn0262126
						CG9901	FBgn0011742
						CG6554	FBgn0037834
						CG8726	FBgn0033244
						CG3501	FBgn0034791
						CG10277	FBgn0037442
						CG9175	FBgn0031779
						CG4445	FBgn0027558
						CG8566	FBgn0267002
						CG6958	FBgn0039004
						CG5047	FBgn0037008
						CG3683	FBgn0035046
						CG15797	FBgn0028292
						CG4013	FBgn0265523
						CG1898	FBgn0042712
						CG1768	FBgn0011202
						CG4903	FBgn0034240
						CG1034	FBgn0000166
						CG40293	FBgn0046692
						CG6352	FBgn0026058
						CG9244	FBgn0010100
						CG7331	FBgn0261108
						CG30483	FBgn0040752
						CG5694	FBgn0032197
						CG5674	FBgn0032656
						CG4198	FBgn0029753
						CG9597	FBgn0038371
						CG18135	FBgn0036837
						CG8053	FBgn0026250
						CG17068	FBgn0031098
						CG11490	FBgn0031233
						CG32663	FBgn0266019
						CG15592	FBgn0037416
						CG31293	FBgn0003227
						CG31357	FBgn0051357
						CG8839	FBgn0033717
						CG5466	FBgn0038815
						CG10373	FBgn0032704
						CG30001	FBgn0050001
						CG7082	FBgn0031401
						CG14816	FBgn0023517
						CG10962	FBgn0030073
						CG8182	FBgn0034025
						CG14026	FBgn0003716
						CG11175	FBgn0034530
						CG5934	FBgn0039505
						CG10229	FBgn0040208
						CG7218	FBgn0038569
						CG14463	FBgn0037535
						CG14290	FBgn0038662
						CG1172	FBgn0264712
						CG31811	FBgn0028509
						CG3891	FBgn0035993
						CG2051	FBgn0037376
						CG3060	FBgn0002791
						CG1427	FBgn0037347
						CG17565	FBgn0038424
						CG1430	FBgn0010292
						CG34363	FBgn0261698
						CG6644	FBgn0026315
						CG7129	FBgn0010877
						CG8638	FBgn0035736
						CG12114	FBgn0086362
						CG12734	FBgn0283724
						CG8817	FBgn0041111
						CG14220	FBgn0031036
						CG9884	FBgn0011818
						CG5658	FBgn0004387
						CG2358	FBgn0262801
						CG4268	FBgn0016696
						CG9865	FBgn0034649
						CG5954	FBgn0002441
						CG5792	FBgn0032455
						CG7359	FBgn0260855
						CG11416	FBgn0035025
						CG7001	FBgn0283473
						CG14442	FBgn0029893
						CG33199	FBgn0053199
						CG13192	FBgn0033653
						CG4287	FBgn0038388
						CG13777	FBgn0262872
						CG40127	FBgn0262116
						CG5385	FBgn0267365
						CG1332	FBgn0263110
						CG7421	FBgn0037137
						CG1725	FBgn0001624
						CG11560	FBgn0036249
						CG12047	FBgn0260482
						CG12047	FBgn0002873
						CG10863	FBgn0027552
						CG5252	FBgn0037894
						CG6235	FBgn0004889
						CG18812	FBgn0042135
						CG4618	FBgn0035589
						CG14434	FBgn0029915
						CG4867	FBgn0040239
						CG5671	FBgn0026379
						CG4973	FBgn0038772
						CG11857	FBgn0039303
						CG7337	FBgn0031374
						CG4662	FBgn0038735
						CG7601	FBgn0027583
						CG10377	FBgn0004838
						CG8432	FBgn0026378
						CG8735	FBgn0033309
						CG33162	FBgn0011509
						CG8804	FBgn0016078
						CG1389	FBgn0003733
						CG16972	FBgn0032481
						CG4771	FBgn0263143
						CG9650	FBgn0029939
						CG8266	FBgn0033339
						CG3456	FBgn0023549
						CG32529	FBgn0052529
						CG1669	FBgn0040513
						CG5794	FBgn0039214
						CG14053	FBgn0029603
						CG4617	FBgn0029936
						CG33106	FBgn0043884
						CG6509	FBgn0032363
						CG13921	FBgn0035267
						CG3291	FBgn0020261
						CG1737	FBgn0030293
						CG3651	FBgn0032974
						CG8027	FBgn0033392
						CG8359	FBgn0037634
						CG6525	FBgn0082831
						CG6147	FBgn0026317
						CG9940	FBgn0030512
						CG10520	FBgn0003882
						CG32296	FBgn0052296
						CG7562	FBgn0010287
						CG8877	FBgn0033688
						CG1250	FBgn0262125
						CG2286	FBgn0017566
						CG6906	FBgn0027843
						CG17064	FBgn0033845
						CG11546	FBgn0010504
						CG33111	FBgn0053111
						CG18347	FBgn0260743
						CG5788	FBgn0026316
						CG40049	FBgn0044510
						CG1765	FBgn0000546
						CG13282	FBgn0032612
						CG3971	FBgn0260960
						CG30046	FBgn0050046
						CG11785	FBgn0045866
						CG33936	FBgn0266410
						CG33936	FBgn0263750
						CG5026	FBgn0035945
						CG33213	FBgn0053213
						CG17759	FBgn0004435
						CG5131	FBgn0032644
						CG9992	FBgn0030744
						CG3026	FBgn0040347
						CG32365	FBgn0052365
						CG17510	FBgn0039969
						CG6981	FBgn0036945
						CG5393	FBgn0015903
						CG7638	FBgn0036133
						CG14435	FBgn0029911
						CG31531	FBgn0263346
						CG5861	FBgn0015338
						CG8890	FBgn0031661
						CG12219	FBgn0043796
						CG30152	FBgn0034543
						CG6543	FBgn0033879
						CG16700	FBgn0030816
						CG5807	FBgn0027539
						CG5241	FBgn0263602
						CG1744	FBgn0267435
						CG3736	FBgn0002989
						CG13363	FBgn0025639
						CG8068	FBgn0003612
						CG6831	FBgn0260442
						CG10504	FBgn0028427
						CG9028	FBgn0036389
						CG33130	FBgn0263197
						CG18468	FBgn0034217
						CG9008	FBgn0028540
						CG10645	FBgn0016031
						CG14217	FBgn0031030
						CG10639	FBgn0032729
						CG4944	FBgn0026084
						CG6159	FBgn0266673
						CG10923	FBgn0004379
						CG3167	FBgn0034962
						CG1603	FBgn0033185
						CG3228	FBgn0001330
						CG14130	FBgn0036210
						CG14818	FBgn0026088
						CG5166	FBgn0041188
						CG1308	FBgn0263110
						CG8557	FBgn0263706
						CG2934	FBgn0285910
						CG8516	FBgn0037757
						CG4385	FBgn0003310
						CG3429	FBgn0003655
						CG3429	FBgn0016974
						CG1529	FBgn0031144
						CG8765	FBgn0036900
						CG6512	FBgn0036702
						CG10724	FBgn0260049
						CG9066	FBgn0030703
						CG1662	FBgn0030481
						CG6633	FBgn0040256
						CG2017	FBgn0037391
						CG9233	FBgn0029173
						CG9695	FBgn0000414
						CG3679	FBgn0027521
						CG4579	FBgn0021761
						CG18542	FBgn0037731
						CG15601	FBgn0030673
						CG1120	FBgn0035462
						CG30007	FBgn0285892
						CG2944	FBgn0026238
						CG10757	FBgn0032849
						CG5688	FBgn0026432
						CG14396	FBgn0011829
						CG8695	FBgn0002571
						CG5452	FBgn0022338
						CG9000	FBgn0034176
						CG12005	FBgn0037301
						CG4214	FBgn0011708
						CG9304	FBgn0034674
						CG1891	FBgn0003317
						CG10444	FBgn0034494
						CG16838	FBgn0036574
						CG4996	FBgn0034271
						CG14616	FBgn0027279
						CG4351	FBgn0263005
						CG33298	FBgn0032120
						CG7376	FBgn0035689
						CG8367	FBgn0000289
						CG10240	FBgn0013773
						CG8209	FBgn0035830
						CG13109	FBgn0041092
						CG6198	FBgn0029503
						CG8069	FBgn0033380
						CG12800	FBgn0039006
						CG2993	FBgn0037521
						CG9318	FBgn0032880
						CG1161	FBgn0037313
						CG33554	FBgn0053554
						CG31886	FBgn0032079
						CG00000	FBgn0025836
						CG9241	FBgn0032929
						CG1483	FBgn0002645
						CG17514	FBgn0039959
						CG9272	FBgn0032907
						CG6755	FBgn0039066
						CG1474	FBgn0023506
						CG7530	FBgn0038256
						CG7099	FBgn0032517
						CG31898	FBgn0051898
						CG7602	FBgn0037554
						CG1578	FBgn0030336
						CG3938	FBgn0010382
						CG14228	FBgn0086384
						CG12290	FBgn0039419
						CG10210	FBgn0039117
						CG10338	FBgn0032700
						CG2701	FBgn0024973
						CG32226	FBgn0052226
						CG9436	FBgn0033101
						CG11436	FBgn0029713
						CG1945	FBgn0005632
						CG8383	FBgn0037737
						CG6322	FBgn0036733
						CG32164	FBgn0042177
						CG7954	FBgn0020249
						CG15737	FBgn0260780
						CG31457	FBgn0051457
						CG2049	FBgn0020621
						CG17724	FBgn0033802
						CG5483	FBgn0038816
						CG15224	FBgn0000259
						CG6707	FBgn0036058
						CG15514	FBgn0039712
						CG11881	FBgn0039638
						CG17018	FBgn0039972
						CG5180	FBgn0043457
						CG3612	FBgn0011211
						CG1966	FBgn0027620
						CG10825	FBgn0038860
						CG10076	FBgn0003475
						CG8915	FBgn0030833
						CG4115	FBgn0038017
						CG30440	FBgn0050440
						CG7347	FBgn0002901
						CG8583	FBgn0035771
						CG5815	FBgn0027574
						CG11734	FBgn0031107
						CG17260	FBgn0031498
						CG8428	FBgn0086676
						CG7360	FBgn0038722
						CG18408	FBgn0033504
						CG9914	FBgn0030737
						CG4208	FBgn0026751
						CG14102	FBgn0036906
						CG8678	FBgn0032935
						CG8588	FBgn0035770
						CG3973	FBgn0029881
						CG4686	FBgn0038739
						CG10733	FBgn0061492
						CG5953	FBgn0032587
						CG31431	FBgn0051431
						CG1530	FBgn0260970
						CG12728	FBgn0029825
						CG1258	FBgn0011692
						CG7903	FBgn0039730
						CG13631	FBgn0040600
						CG17678	FBgn0000384
						CG33054	FBgn0053054
						CG7128	FBgn0022724
						CG2212	FBgn0003656
						CG9353	FBgn0034579
						CG4751	FBgn0032348
						CG32701	FBgn0028327
						CG32109	FBgn0052109
						CG10753	FBgn0261933
						CG4413	FBgn0038767
						CG8825	FBgn0260817
						CG30343	FBgn0050343
						CG8229	FBgn0033356
						CG2087	FBgn0037327
						CG33275	FBgn0035802
						CG6721	FBgn0004390
						CG14303	FBgn0263974
						CG1495	FBgn0016126
						CG5004	FBgn0260748
						CG4816	FBgn0022987
						CG8177	FBgn0036043
						CG2818	FBgn0031566
						CG9539	FBgn0086357
						CG10916	FBgn0034312
						CG30295	FBgn0050295
						CG34374	FBgn0264895
						CG3274	FBgn0042085
						CG12512	FBgn0031703
						CG8815	FBgn0022764
						CG3376	FBgn0034997
						CG40129	FBgn0260798
						CG3279	FBgn0260862
						CG6121	FBgn0026080
						CG11259	FBgn0036333
						CG4943	FBgn0029006
						CG8024	FBgn0002567
						CG31637	FBgn0051637
						CG10721	FBgn0032846
						CG6422	FBgn0039261
						CG10225	FBgn0039110
						CG5645	FBgn0036254
						CG10219	FBgn0039112
						CG14517	FBgn0039625
						CG7480	FBgn0001970
						CG5273	FBgn0040382
						CG12399	FBgn0011648
						CG2928	FBgn0015801
						CG31224	FBgn0051224
						CG2685	FBgn0024998
						CG2218	FBgn0039767
						CG3615	FBgn0034110
						CG11342	FBgn0035537
						CG5455	FBgn0039430
						CG10973	FBgn0036306
						CG11006	FBgn0262714
						CG5663	FBgn0000455
						CG10583	FBgn0035627
						CG10492	FBgn0032748
						CG33090	FBgn0028916
						CG10293	FBgn0264491
						CG34017	FBgn0260965
						CG3620	FBgn0262738
						CG31441	FBgn0051441
						CG8075	FBgn0015838
						CG31094	FBgn0066101
						CG3797	FBgn0036842
						CG16868	FBgn0034498
						CG9655	FBgn0026630
						CG3631	FBgn0038268
						CG15395	FBgn0031440
						CG8503	FBgn0033917
						CG3479	FBgn0003016
						CG5127	FBgn0039335
						CG6896	FBgn0036801
						CG8257	FBgn0033900
						CG4353	FBgn0010303
						CG8830	FBgn0033738
						CG14938	FBgn0020309
						CG6647	FBgn0004363
						CG17689	FBgn0036374
						CG32654	FBgn0052654
						CG32512	FBgn0052512
						CG2991	FBgn0031474
						CG6773	FBgn0024509
						CG33174	FBgn0261244
						CG13531	FBgn0034786
						CG31033	FBgn0039705
						CG1454	FBgn0005642
						CG8607	FBgn0035760
						CG13541	FBgn0034841
						CG31991	FBgn0004797
						CG14903	FBgn0038446
						CG10681	FBgn0036291
						CG9144	FBgn0031773
						CG1609	FBgn0019990
						CG4998	FBgn0036612
						CG8312	FBgn0037720
						CG15104	FBgn0267351
						CG1417	FBgn0003423
						CG5106	FBgn0037879
						CG12787	FBgn0041150
						CG6137	FBgn0000146
						CG2079	FBgn0029944
						CG5735	FBgn0264307
						CG10719	FBgn0010300
						CG11412	FBgn0024362
						CG5726	FBgn0034313
						CG31875	FBgn0051875
						CG14511	FBgn0039641
						CG17593	FBgn0031544
						CG12015	FBgn0035155
						CG8490	FBgn0033715
						CG30147	FBgn0050147
						CG6535	FBgn0045035
						CG1520	FBgn0024273
						CG14657	FBgn0037282
						CG7450	FBgn0004396
						CG7510	FBgn0036741
						CG1210	FBgn0020386
						CG7371	FBgn0031710
						CG11983	FBgn0037654
						CG8961	FBgn0086350
						CG12025	FBgn0035285
						CG12749	FBgn0004237
						CG9755	FBgn0003165
						CG31897	FBgn0051897
						CG17883	FBgn0040005
						CG31678	FBgn0051678
						CG7979	FBgn0035848
						CG17376	FBgn0042189
						CG8058	FBgn0033382
						CG34100	FBgn0263490
						CG1594	FBgn0004864
						CG6312	FBgn0020379
						CG11873	FBgn0039633
						CG31849	FBgn0051849
						CG5683	FBgn0005694
						CG14229	FBgn0031059
						CG12175	FBgn0030502
						CG32541	FBgn0264090
						CG3943	FBgn0020545
						CG9311	FBgn0036448
						CG32498	FBgn0000479
						CG9448	FBgn0037734
						CG7182	FBgn0035878
						CG3771	FBgn0023130
						CG10435	FBgn0037539
						CG1836	FBgn0026777
						CG31304	FBgn0261859
						CG14216	FBgn0031054
						CG8019	FBgn0001179
						CG32632	FBgn0086674
						CG8865	FBgn0026376
						CG7865	FBgn0033050
						CG3510	FBgn0000405
						CG9977	FBgn0035371
						CG15727	FBgn0030410
						CG5604	FBgn0032208
						CG3051	FBgn0023169
						CG8327	FBgn0037723
						CG9934	FBgn0032467
						CG31712	FBgn0051712
						CG8863	FBgn0038145
						CG11896	FBgn0038488
						CG9187	FBgn0035194
						CG2140	FBgn0264294
						CG12090	FBgn0035227
						CG12090	FBgn0053971
						CG11739	FBgn0037239
						CG5643	FBgn0027492
						CG34373	FBgn0262579
						CG2199	FBgn0035213
						CG12086	FBgn0011204
						CG32775	FBgn0066114
						CG18492	FBgn0026323
						CG5581	FBgn0266420
						CG32939	FBgn0052939
						CG11008	FBgn0260965
						CG14224	FBgn0031057
						CG17369	FBgn0005671
						CG12391	FBgn0033581
						CG6175	FBgn0036152
						CG10738	FBgn0036368
						CG10653	FBgn0001202
						CG3099	FBgn0261931
						CG14712	FBgn0037924
						CG4591	FBgn0037848
						CG6051	FBgn0039492
						CG8632	FBgn0033762
						CG4201	FBgn0024222
						CG8671	FBgn0032938
						CG7730	FBgn0036689
						CG1618	FBgn0000346
						CG11206	FBgn0034720
						CG8994	FBgn0000615
						CG12234	FBgn0031051
						CG11188	FBgn0031851
						CG2921	FBgn0034689
						CG31919	FBgn0264743
						CG31919	FBgn0264742
						CG31142	FBgn0047114
						CG31935	FBgn0051935
						CG13424	FBgn0034520
						CG5886	FBgn0039379
						CG5263	FBgn0016070
						CG40005	FBgn0058005
						CG9086	FBgn0030809
						CG1829	FBgn0031126
						CG17337	FBgn0259979
						CG9537	FBgn0031820
						CG11525	FBgn0039858
						CG5994	FBgn0017430
						CG11906	FBgn0034425
						CG18593	FBgn0036237
						CG1845	FBgn0033155
						CG8098	FBgn0024315
						CG1705	FBgn0002723
						CG13896	FBgn0035159
						CG18213	FBgn0038470
						CG2316	FBgn0039890
						CG11696	FBgn0030314
						CG15171	FBgn0028569
						CG7825	FBgn0025808
						CG5214	FBgn0037891
						CG9113	FBgn0030089
						CG18764	FBgn0042205
						CG8104	FBgn0036059
						CG8931	FBgn0030717
						CG15743	FBgn0030465
						CG32491	FBgn0002781

## Sheet: ZLD ChIp Overlap
ZLD ChIP associated genes	Overlapping up-regulated mat-zyg + zygotic genes
FBgn0020238	FBgn0000395
FBgn0004907	FBgn0000723
FBgn0004364	FBgn0001075
FBgn0263116	FBgn0001123
FBgn0087012	FBgn0001148
FBgn0261929	FBgn0001235
FBgn0000008	FBgn0001323
FBgn0011294	FBgn0001987
FBgn0027885	FBgn0002543
FBgn0031791	FBgn0002945
FBgn0023129	FBgn0003002
FBgn0264442	FBgn0003145
FBgn0000014	FBgn0003313
FBgn0000015	FBgn0003326
FBgn0000017	FBgn0003862
FBgn0000018	FBgn0003866
FBgn0000022	FBgn0004110
FBgn0023416	FBgn0004364
FBgn0024150	FBgn0004394
FBgn0012034	FBgn0004892
FBgn0016122	FBgn0005672
FBgn0027620	FBgn0005674
FBgn0000028	FBgn0010105
FBgn0028484	FBgn0010389
FBgn0010100	FBgn0010638
FBgn0002856	FBgn0011225
FBgn0000032	FBgn0011638
FBgn0263120	FBgn0011704
FBgn0000043	FBgn0011706
FBgn0000044	FBgn0012037
FBgn0000042	FBgn0013272
FBgn0040509	FBgn0013469
FBgn0040508	FBgn0014388
FBgn0040507	FBgn0015380
FBgn0040506	FBgn0015513
FBgn0025115	FBgn0015541
FBgn0027619	FBgn0015618
FBgn0038341	FBgn0016797
FBgn0026573	FBgn0020294
FBgn0000053	FBgn0020299
FBgn0020513	FBgn0023172
FBgn0284249	FBgn0023214
FBgn0036752	FBgn0023388
FBgn0000055	FBgn0024244
FBgn0000057	FBgn0025790
FBgn0027493	FBgn0026077
FBgn0005694	FBgn0027611
FBgn0038223	FBgn0029082
FBgn0053138	FBgn0029095
FBgn0041171	FBgn0029123
FBgn0087035	FBgn0031869
FBgn0250816	FBgn0031879
FBgn0035371	FBgn0032451
FBgn0031392	FBgn0032633
FBgn0033351	FBgn0032681
FBgn0050185	FBgn0032682
FBgn0027932	FBgn0032691
FBgn0004552	FBgn0032848
FBgn0082598	FBgn0033159
FBgn0010379	FBgn0033188
FBgn0000061	FBgn0033486
FBgn0000064	FBgn0033649
FBgn0012036	FBgn0033652
FBgn0010548	FBgn0033817
FBgn0086378	FBgn0034142
FBgn0261238	FBgn0034310
FBgn0040505	FBgn0034606
FBgn0086361	FBgn0034797
FBgn0010215	FBgn0035348
FBgn0015568	FBgn0036494
FBgn0261393	FBgn0036684
FBgn0259170	FBgn0036732
FBgn0039634	FBgn0037552
FBgn0026616	FBgn0037561
FBgn0025725	FBgn0037992
FBgn0003884	FBgn0038038
FBgn0003885	FBgn0038039
FBgn0038535	FBgn0038760
FBgn0000071	FBgn0038890
FBgn0086782	FBgn0038981
FBgn0003270	FBgn0039139
FBgn0030328	FBgn0039189
FBgn0011746	FBgn0039283
FBgn0262167	FBgn0039286
FBgn0012037	FBgn0039590
FBgn0011747	FBgn0039727
FBgn0261788	FBgn0040001
FBgn0028343	FBgn0040106
FBgn0025111	FBgn0040297
FBgn0260642	FBgn0051414
FBgn0000097	FBgn0052982
FBgn0004569	FBgn0053207
FBgn0038350	FBgn0053229
FBgn0267978	FBgn0085400
FBgn0030089	FBgn0087012
FBgn0026598	FBgn0259173
FBgn0261854	FBgn0259211
FBgn0015903	FBgn0260642
FBgn0015904	FBgn0260745
FBgn0013750	FBgn0260746
FBgn0037884	FBgn0260990
FBgn0030088	FBgn0261563
FBgn0000116	FBgn0261649
FBgn0037526	FBgn0261800
FBgn0025186	FBgn0261823
FBgn0000115	FBgn0261963
FBgn0039889	FBgn0263392
FBgn0000117	FBgn0268063
FBgn0011741
FBgn0284255
FBgn0000119
FBgn0000120
FBgn0033062
FBgn0031592
FBgn0034817
FBgn0038188
FBgn0029095
FBgn0050372
FBgn0039908
FBgn0000137
FBgn0029094
FBgn0005386
FBgn0014006
FBgn0261004
FBgn0000140
FBgn0034075
FBgn0034606
FBgn0015591
FBgn0032336
FBgn0036790
FBgn0036789
FBgn0261823
FBgn0032691
FBgn0039946
FBgn0025720
FBgn0020762
FBgn0033010
FBgn0260945
FBgn0261108
FBgn0039636
FBgn0039705
FBgn0037363
FBgn0035850
FBgn0044452
FBgn0029943
FBgn0052672
FBgn0034110
FBgn0039213
FBgn0010433
FBgn0037989
FBgn0002921
FBgn0019644
FBgn0010217
FBgn0067782
FBgn0029907
FBgn0031420
FBgn0037218
FBgn0013751
FBgn0026597
FBgn0262870
FBgn0261647
FBgn0033238
FBgn0011758
FBgn0004854
FBgn0023407
FBgn0004587
FBgn0024897
FBgn0004870
FBgn0025525
FBgn0011300
FBgn0034724
FBgn0031453
FBgn0045866
FBgn0260960
FBgn0027889
FBgn0042085
FBgn0000163
FBgn0087007
FBgn0031255
FBgn0024251
FBgn0040239
FBgn0000166
FBgn0043362
FBgn0013432
FBgn0034049
FBgn0052594
FBgn0038494
FBgn0032629
FBgn0263231
FBgn0000173
FBgn0040238
FBgn0035696
FBgn0036491
FBgn0037215
FBgn0250788
FBgn0039625
FBgn0039258
FBgn0015000
FBgn0284243
FBgn0027348
FBgn0000179
FBgn0035871
FBgn0000180
FBgn0000182
FBgn0014133
FBgn0038252
FBgn0039282
FBgn0024491
FBgn0263144
FBgn0026262
FBgn0035625
FBgn0050077
FBgn0027660
FBgn0011211
FBgn0036449
FBgn0001090
FBgn0004389
FBgn0014135
FBgn0040487
FBgn0037719
FBgn0040388
FBgn0029730
FBgn0011206
FBgn0023097
FBgn0040237
FBgn0259791
FBgn0000206
FBgn0261284
FBgn0004893
FBgn0010300
FBgn0000216
FBgn0086694
FBgn0024250
FBgn0000221
FBgn0013755
FBgn0262475
FBgn0264001
FBgn0036712
FBgn0004101
FBgn0261822
FBgn0000227
FBgn0000228
FBgn0000229
FBgn0005666
FBgn0000233
FBgn0003502
FBgn0285896
FBgn0032600
FBgn0259176
FBgn0000239
FBgn0011723
FBgn0004863
FBgn0032078
FBgn0000247
FBgn0259822
FBgn0263111
FBgn0000250
FBgn0031114
FBgn0000251
FBgn0036715
FBgn0261053
FBgn0037963
FBgn0038247
FBgn0039709
FBgn0015609
FBgn0262018
FBgn0053653
FBgn0033526
FBgn0030054
FBgn0037646
FBgn0012051
FBgn0005585
FBgn0039928
FBgn0016126
FBgn0259234
FBgn0011569
FBgn0040233
FBgn0033504
FBgn0039680
FBgn0051989
FBgn0042134
FBgn0000257
FBgn0004878
FBgn0013759
FBgn0000261
FBgn0029093
FBgn0015919
FBgn0026257
FBgn0033842
FBgn0026144
FBgn0086757
FBgn0043364
FBgn0011241
FBgn0038331
FBgn0004783
FBgn0003676
FBgn0037533
FBgn0052499
FBgn0051973
FBgn0012058
FBgn0010341
FBgn0028360
FBgn0032821
FBgn0004876
FBgn0004106
FBgn0016131
FBgn0015618
FBgn0261532
FBgn0000279
FBgn0032409
FBgn0029092
FBgn0039056
FBgn0028509
FBgn0036480
FBgn0037315
FBgn0000286
FBgn0000289
FBgn0039590
FBgn0038028
FBgn0038013
FBgn0037490
FBgn0034440
FBgn0035720
FBgn0034441
FBgn0034644
FBgn0037472
FBgn0035702
FBgn0033960
FBgn0038397
FBgn0032796
FBgn0032790
FBgn0033969
FBgn0039118
FBgn0036356
FBgn0035690
FBgn0037395
FBgn0032681
FBgn0034643
FBgn0038453
FBgn0034972
FBgn0032707
FBgn0030358
FBgn0039109
FBgn0034731
FBgn0033021
FBgn0039296
FBgn0032724
FBgn0034638
FBgn0037539
FBgn0034494
FBgn0033440
FBgn0032815
FBgn0035670
FBgn0035661
FBgn0035656
FBgn0032827
FBgn0034570
FBgn0030034
FBgn0035630
FBgn0037046
FBgn0032717
FBgn0032817
FBgn0046302
FBgn0032853
FBgn0036294
FBgn0032839
FBgn0036287
FBgn0035592
FBgn0032752
FBgn0036377
FBgn0036360
FBgn0032843
FBgn0034082
FBgn0036368
FBgn0037250
FBgn0032769
FBgn0036325
FBgn0033830
FBgn0034478
FBgn0028858
FBgn0038163
FBgn0037238
FBgn0034312
FBgn0037514
FBgn0034356
FBgn0029969
FBgn0010620
FBgn0036320
FBgn0036317
FBgn0037379
FBgn0031208
FBgn0037235
FBgn0031736
FBgn0034481
FBgn0031836
FBgn0039244
FBgn0030408
FBgn0046222
FBgn0030528
FBgn0033164
FBgn0033165
FBgn0033169
FBgn0033174
FBgn0030400
FBgn0030499
FBgn0034500
FBgn0034488
FBgn0033067
FBgn0037290
FBgn0037186
FBgn0037115
FBgn0036346
FBgn0036342
FBgn0030056
FBgn0037108
FBgn0037070
FBgn0035537
FBgn0030375
FBgn0035558
FBgn0039920
FBgn0029951
FBgn0040364
FBgn0037021
FBgn0026876
FBgn0037169
FBgn0037504
FBgn0037165
FBgn0037164
FBgn0029715
FBgn0037162
FBgn0031224
FBgn0035397
FBgn0039749
FBgn0035424
FBgn0037156
FBgn0039859
FBgn0039864
FBgn0039882
FBgn0035524
FBgn0036221
FBgn0031244
FBgn0038069
FBgn0032965
FBgn0032964
FBgn0032968
FBgn0036194
FBgn0030638
FBgn0040648
FBgn0038113
FBgn0037562
FBgn0029856
FBgn0038690
FBgn0264712
FBgn0037239
FBgn0033527
FBgn0039266
FBgn0036099
FBgn0039616
FBgn0039272
FBgn0039630
FBgn0028947
FBgn0039633
FBgn0033538
FBgn0039644
FBgn0039645
FBgn0037645
FBgn0037648
FBgn0035236
FBgn0035464
FBgn0037293
FBgn0035430
FBgn0035445
FBgn0035436
FBgn0035263
FBgn0039831
FBgn0040031
FBgn0030065
FBgn0030053
FBgn0043458
FBgn0033280
FBgn0033475
FBgn0033469
FBgn0033471
FBgn0037325
FBgn0260462
FBgn0033158
FBgn0037377
FBgn0031636
FBgn0285913
FBgn0038057
FBgn0036514
FBgn0038617
FBgn0038558
FBgn0037370
FBgn0030676
FBgn0037368
FBgn0038202
FBgn0039588
FBgn0037797
FBgn0031201
FBgn0028857
FBgn0040371
FBgn0036809
FBgn0040688
FBgn0086604
FBgn0035571
FBgn0040385
FBgn0038968
FBgn0030729
FBgn0039577
FBgn0040816
FBgn0031064
FBgn0038157
FBgn0030570
FBgn0029930
FBgn0037213
FBgn0040684
FBgn0030224
FBgn0031103
FBgn0029729
FBgn0029717
FBgn0029707
FBgn0029952
FBgn0029701
FBgn0031070
FBgn0030666
FBgn0029825
FBgn0029771
FBgn0037206
FBgn0033252
FBgn0030055
FBgn0038448
FBgn0031535
FBgn0037798
FBgn0033948
FBgn0033523
FBgn0033521
FBgn0033507
FBgn0033502
FBgn0033501
FBgn0033500
FBgn0033569
FBgn0034031
FBgn0037065
FBgn0030868
FBgn0035501
FBgn0030847
FBgn0030807
FBgn0030769
FBgn0036665
FBgn0036670
FBgn0036652
FBgn0032810
FBgn0032050
FBgn0032084
FBgn0032150
FBgn0032156
FBgn0033767
FBgn0033712
FBgn0033650
FBgn0033627
FBgn0033608
FBgn0031129
FBgn0032577
FBgn0036984
FBgn0037014
FBgn0086673
FBgn0035643
FBgn0035648
FBgn0035699
FBgn0040828
FBgn0035932
FBgn0035949
FBgn0033787
FBgn0033788
FBgn0033856
FBgn0033884
FBgn0026874
FBgn0029531
FBgn0025633
FBgn0040370
FBgn0029518
FBgn0032036
FBgn0032042
FBgn0030559
FBgn0034514
FBgn0027507
FBgn0034548
FBgn0036503
FBgn0036482
FBgn0036471
FBgn0040809
FBgn0036443
FBgn0036419
FBgn0034662
FBgn0034723
FBgn0034774
FBgn0034820
FBgn0034833
FBgn0030151
FBgn0034966
FBgn0035000
FBgn0033196
FBgn0039202
FBgn0039217
FBgn0285912
FBgn0039288
FBgn0039291
FBgn0035844
FBgn0031270
FBgn0036781
FBgn0036785
FBgn0033482
FBgn0035572
FBgn0035570
FBgn0042199
FBgn0035563
FBgn0036705
FBgn0036708
FBgn0036717
FBgn0036382
FBgn0036390
FBgn0033372
FBgn0033368
FBgn0033355
FBgn0031834
FBgn0031897
FBgn0036956
FBgn0039068
FBgn0034501
FBgn0030033
FBgn0035109
FBgn0035138
FBgn0035139
FBgn0035146
FBgn0035157
FBgn0035159
FBgn0035161
FBgn0035176
FBgn0035237
FBgn0035248
FBgn0035267
FBgn0035246
FBgn0035258
FBgn0033412
FBgn0032824
FBgn0031811
FBgn0031792
FBgn0031753
FBgn0031739
FBgn0031718
FBgn0029962
FBgn0031707
FBgn0031697
FBgn0040392
FBgn0032315
FBgn0036351
FBgn0036350
FBgn0036343
FBgn0036205
FBgn0036112
FBgn0032961
FBgn0033468
FBgn0036932
FBgn0036935
FBgn0031037
FBgn0032966
FBgn0031052
FBgn0032967
FBgn0038695
FBgn0038630
FBgn0038567
FBgn0038566
FBgn0038540
FBgn0038531
FBgn0038207
FBgn0030038
FBgn0030582
FBgn0030571
FBgn0029931
FBgn0029915
FBgn0029895
FBgn0029880
FBgn0037191
FBgn0037184
FBgn0037183
FBgn0037174
FBgn0033000
FBgn0028953
FBgn0034284
FBgn0034283
FBgn0034321
FBgn0034327
FBgn0039659
FBgn0039609
FBgn0031955
FBgn0031954
FBgn0039395
FBgn0037149
FBgn0037139
FBgn0033063
FBgn0033054
FBgn0037503
FBgn0037483
FBgn0030558
FBgn0031183
FBgn0030406
FBgn0037252
FBgn0037254
FBgn0037284
FBgn0037288
FBgn0037291
FBgn0037317
FBgn0037320
FBgn0037829
FBgn0037845
FBgn0037850
FBgn0037930
FBgn0037939
FBgn0033275
FBgn0033277
FBgn0033243
FBgn0026090
FBgn0035782
FBgn0038445
FBgn0032335
FBgn0032360
FBgn0032377
FBgn0032406
FBgn0035431
FBgn0040694
FBgn0035482
FBgn0035497
FBgn0031157
FBgn0030905
FBgn0034398
FBgn0034413
FBgn0034418
FBgn0034461
FBgn0034467
FBgn0032665
FBgn0032692
FBgn0032733
FBgn0030296
FBgn0030261
FBgn0030247
FBgn0034551
FBgn0034554
FBgn0033076
FBgn0032563
FBgn0028878
FBgn0028879
FBgn0028844
FBgn0030183
FBgn0030029
FBgn0030040
FBgn0030077
FBgn0031393
FBgn0031403
FBgn0031440
FBgn0031542
FBgn0031596
FBgn0031602
FBgn0031610
FBgn0039827
FBgn0031161
FBgn0031130
FBgn0040649
FBgn0061196
FBgn0032489
FBgn0032442
FBgn0038894
FBgn0038892
FBgn0030258
FBgn0039742
FBgn0039748
FBgn0039769
FBgn0037398
FBgn0037421
FBgn0030667
FBgn0030694
FBgn0031644
FBgn0031632
FBgn0031630
FBgn0031627
FBgn0028943
FBgn0030642
FBgn0030665
FBgn0034578
FBgn0034622
FBgn0038833
FBgn0034131
FBgn0030440
FBgn0030390
FBgn0031910
FBgn0030246
FBgn0035312
FBgn0035308
FBgn0033467
FBgn0035569
FBgn0033090
FBgn0038814
FBgn0033191
FBgn0033183
FBgn0030218
FBgn0030245
FBgn0030478
FBgn0039600
FBgn0039602
FBgn0036032
FBgn0034459
FBgn0029820
FBgn0030482
FBgn0039897
FBgn0035393
FBgn0035348
FBgn0029941
FBgn0037698
FBgn0034974
FBgn0038881
FBgn0032490
FBgn0032491
FBgn0032495
FBgn0028931
FBgn0028544
FBgn0028938
FBgn0034483
FBgn0034480
FBgn0040394
FBgn0037741
FBgn0036481
FBgn0032387
FBgn0032481
FBgn0032479
FBgn0040972
FBgn0036512
FBgn0035356
FBgn0031082
FBgn0033167
FBgn0032424
FBgn0036550
FBgn0032449
FBgn0033827
FBgn0036962
FBgn0035151
FBgn0036246
FBgn0039945
FBgn0039944
FBgn0040571
FBgn0039366
FBgn0038775
FBgn0032419
FBgn0046225
FBgn0031488
FBgn0038829
FBgn0038830
FBgn0032029
FBgn0032755
FBgn0033934
FBgn0039977
FBgn0032997
FBgn0040009
FBgn0040010
FBgn0039970
FBgn0039959
FBgn0261387
FBgn0032775
FBgn0250842
FBgn0031544
FBgn0031195
FBgn0083978
FBgn0262115
FBgn0263780
FBgn0036348
FBgn0041004
FBgn0035423
FBgn0035730
FBgn0033529
FBgn0039167
FBgn0037525
FBgn0028394
FBgn0036454
FBgn0038919
FBgn0034624
FBgn0033491
FBgn0030360
FBgn0033423
FBgn0031119
FBgn0031345
FBgn0033426
FBgn0034403
FBgn0030403
FBgn0037553
FBgn0030956
FBgn0036725
FBgn0031724
FBgn0031719
FBgn0031869
FBgn0031127
FBgn0039761
FBgn0033458
FBgn0030345
FBgn0028527
FBgn0028746
FBgn0039189
FBgn0034326
FBgn0038053
FBgn0031469
FBgn0037870
FBgn0038589
FBgn0027561
FBgn0040967
FBgn0042110
FBgn0042185
FBgn0042135
FBgn0042146
FBgn0033421
FBgn0033434
FBgn0039674
FBgn0039911
FBgn0022349
FBgn0037468
FBgn0039623
FBgn0029940
FBgn0030485
FBgn0039886
FBgn0250839
FBgn0030344
FBgn0039887
FBgn0039877
FBgn0033289
FBgn0030251
FBgn0035388
FBgn0037360
FBgn0030243
FBgn0035213
FBgn0032955
FBgn0027544
FBgn0039767
FBgn0039773
FBgn0030320
FBgn0039792
FBgn0033484
FBgn0035204
FBgn0039665
FBgn0032969
FBgn0030384
FBgn0032871
FBgn0037512
FBgn0032877
FBgn0025838
FBgn0024995
FBgn0024991
FBgn0037536
FBgn0024975
FBgn0035090
FBgn0035087
FBgn0031533
FBgn0034931
FBgn0031646
FBgn0031273
FBgn0014930
FBgn0029728
FBgn0023526
FBgn0029725
FBgn0030206
FBgn0033241
FBgn0023528
FBgn0031585
FBgn0031474
FBgn0260474
FBgn0050015
FBgn0050036
FBgn0050047
FBgn0050056
FBgn0050062
FBgn0050069
FBgn0050080
FBgn0050089
FBgn0050091
FBgn0050108
FBgn0050114
FBgn0028496
FBgn0050122
FBgn0050156
FBgn0050161
FBgn0050178
FBgn0050197
FBgn0040337
FBgn0050286
FBgn0050334
FBgn0050350
FBgn0050357
FBgn0031645
FBgn0050389
FBgn0050403
FBgn0050411
FBgn0050430
FBgn0050438
FBgn0050440
FBgn0050463
FBgn0050497
FBgn0050499
FBgn0038195
FBgn0029804
FBgn0051016
FBgn0051038
FBgn0051051
FBgn0030148
FBgn0029807
FBgn0051086
FBgn0051088
FBgn0051103
FBgn0051122
FBgn0051128
FBgn0051145
FBgn0051183
FBgn0051195
FBgn0051206
FBgn0051211
FBgn0051213
FBgn0051235
FBgn0051249
FBgn0063261
FBgn0051337
FBgn0051345
FBgn0051418
FBgn0051437
FBgn0051441
FBgn0051457
FBgn0051516
FBgn0051522
FBgn0051523
FBgn0051528
FBgn0029789
FBgn0051601
FBgn0051606
FBgn0051612
FBgn0051635
FBgn0051637
FBgn0031673
FBgn0051659
FBgn0051668
FBgn0051678
FBgn0029896
FBgn0051693
FBgn0051694
FBgn0051703
FBgn0051710
FBgn0046888
FBgn0051773
FBgn0051792
FBgn0051793
FBgn0051797
FBgn0051800
FBgn0051802
FBgn0051804
FBgn0051809
FBgn0051832
FBgn0051855
FBgn0051867
FBgn0051871
FBgn0051875
FBgn0051908
FBgn0051913
FBgn0051928
FBgn0051997
FBgn0051999
FBgn0052000
FBgn0052026
FBgn0052037
FBgn0052053
FBgn0052054
FBgn0052066
FBgn0052095
FBgn0052119
FBgn0052137
FBgn0052141
FBgn0047338
FBgn0052150
FBgn0034568
FBgn0052161
FBgn0052196
FBgn0052199
FBgn0037538
FBgn0052232
FBgn0047330
FBgn0052237
FBgn0052238
FBgn0052243
FBgn0029882
FBgn0052264
FBgn0052266
FBgn0052280
FBgn0260480
FBgn0052298
FBgn0052305
FBgn0052319
FBgn0052354
FBgn0052379
FBgn0052392
FBgn0052396
FBgn0052432
FBgn0043783
FBgn0052447
FBgn0052448
FBgn0052450
FBgn0052457
FBgn0052459
FBgn0052461
FBgn0052512
FBgn0052532
FBgn0034978
FBgn0052639
FBgn0052643
FBgn0052647
FBgn0052655
FBgn0052720
FBgn0052755
FBgn0052758
FBgn0052772
FBgn0052801
FBgn0052806
FBgn0025642
FBgn0052816
FBgn0052847
FBgn0052850
FBgn0037030
FBgn0052944
FBgn0052945
FBgn0052971
FBgn0052982
FBgn0052983
FBgn0052986
FBgn0053051
FBgn0053052
FBgn0038877
FBgn0053095
FBgn0053110
FBgn0053111
FBgn0053144
FBgn0053158
FBgn0053169
FBgn0053170
FBgn0053181
FBgn0053203
FBgn0053217
FBgn0261373
FBgn0053229
FBgn0036495
FBgn0053262
FBgn0053285
FBgn0053293
FBgn0053296
FBgn0032120
FBgn0053307
FBgn0053325
FBgn0035154
FBgn0053453
FBgn0053460
FBgn0053463
FBgn0053474
FBgn0053483
FBgn0036459
FBgn0250819
FBgn0053523
FBgn0034989
FBgn0053640
FBgn0061359
FBgn0039508
FBgn0053690
FBgn0053704
FBgn0053723
FBgn0053752
FBgn0034997
FBgn0053764
FBgn0053766
FBgn0053774
FBgn0053777
FBgn0053795
FBgn0053798
FBgn0035152
FBgn0053919
FBgn0053969
FBgn0053977
FBgn0053978
FBgn0053993
FBgn0054007
FBgn0054008
FBgn0035148
FBgn0054027
FBgn0054031
FBgn0054038
FBgn0054039
FBgn0031573
FBgn0033095
FBgn0083949
FBgn0083953
FBgn0083956
FBgn0083972
FBgn0083985
FBgn0083986
FBgn0085193
FBgn0085199
FBgn0085200
FBgn0085201
FBgn0085202
FBgn0085213
FBgn0085218
FBgn0085227
FBgn0033100
FBgn0085237
FBgn0085240
FBgn0085243
FBgn0085246
FBgn0085248
FBgn0085253
FBgn0085263
FBgn0085292
FBgn0085295
FBgn0085326
FBgn0085329
FBgn0085332
FBgn0263829
FBgn0085376
FBgn0085382
FBgn0085383
FBgn0085384
FBgn0031229
FBgn0085396
FBgn0085400
FBgn0085405
FBgn0085412
FBgn0085422
FBgn0085430
FBgn0085446
FBgn0085458
FBgn0085460
FBgn0085462
FBgn0085464
FBgn0085478
FBgn0085479
FBgn0085480
FBgn0085481
FBgn0085486
FBgn0028913
FBgn0034849
FBgn0046253
FBgn0031430
FBgn0029716
FBgn0035999
FBgn0029708
FBgn0023521
FBgn0035069
FBgn0031245
FBgn0037026
FBgn0032981
FBgn0261444
FBgn0035070
FBgn0032974
FBgn0040397
FBgn0027521
FBgn0040350
FBgn0031227
FBgn0039240
FBgn0022343
FBgn0036684
FBgn0035085
FBgn0030425
FBgn0034800
FBgn0038275
FBgn0038837
FBgn0032130
FBgn0023520
FBgn0034871
FBgn0034958
FBgn0038003
FBgn0029873
FBgn0037780
FBgn0037788
FBgn0038008
FBgn0036821
FBgn0031574
FBgn0035989
FBgn0058006
FBgn0030418
FBgn0058045
FBgn0058178
FBgn0058191
FBgn0029821
FBgn0035986
FBgn0063670
FBgn0032149
FBgn0058470
FBgn0069973
FBgn0034976
FBgn0069969
FBgn0038482
FBgn0029798
FBgn0035983
FBgn0029791
FBgn0039955
FBgn0069923
FBgn0038017
FBgn0085638
FBgn0084001
FBgn0087011
FBgn0028892
FBgn0025627
FBgn0025628
FBgn0250844
FBgn0250754
FBgn0250867
FBgn0250869
FBgn0259143
FBgn0259163
FBgn0259164
FBgn0259167
FBgn0259183
FBgn0036639
FBgn0259196
FBgn0259213
FBgn0259227
FBgn0259238
FBgn0259241
FBgn0259244
FBgn0259677
FBgn0259699
FBgn0259701
FBgn0259716
FBgn0259721
FBgn0259735
FBgn0259738
FBgn0259740
FBgn0259994
FBgn0260027
FBgn0260388
FBgn0260390
FBgn0260392
FBgn0260429
FBgn0260487
FBgn0260646
FBgn0260658
FBgn0260777
FBgn0260870
FBgn0031389
FBgn0260997
FBgn0261360
FBgn0034598
FBgn0261538
FBgn0261553
FBgn0261556
FBgn0261566
FBgn0261570
FBgn0261583
FBgn0261674
FBgn0261627
FBgn0261628
FBgn0261630
FBgn0261641
FBgn0261682
FBgn0261705
FBgn0261802
FBgn0261806
FBgn0261816
FBgn0261830
FBgn0261831
FBgn0014092
FBgn0261848
FBgn0263354
FBgn0261989
FBgn0261990
FBgn0261999
FBgn0262001
FBgn0262006
FBgn0262020
FBgn0262035
FBgn0262098
FBgn0262099
FBgn0038388
FBgn0024983
FBgn0036272
FBgn0030747
FBgn0262366
FBgn0262479
FBgn0262482
FBgn0262487
FBgn0262528
FBgn0262531
FBgn0262535
FBgn0262562
FBgn0262566
FBgn0262576
FBgn0262581
FBgn0262588
FBgn0262605
FBgn0262617
FBgn0262679
FBgn0262719
FBgn0262787
FBgn0030455
FBgn0262813
FBgn0262817
FBgn0262818
FBgn0262821
FBgn0262839
FBgn0262842
FBgn0262875
FBgn0262876
FBgn0262890
FBgn0262893
FBgn0026878
FBgn0262962
FBgn0262980
FBgn0263004
FBgn0263005
FBgn0263026
FBgn0263036
FBgn0263037
FBgn0263038
FBgn0263040
FBgn0263041
FBgn0263042
FBgn0263077
FBgn0263050
FBgn0263051
FBgn0263083
FBgn0263086
FBgn0263109
FBgn0263131
FBgn0263206
FBgn0263246
FBgn0263256
FBgn0263320
FBgn0263321
FBgn0028481
FBgn0263346
FBgn0263401
FBgn0263402
FBgn0038787
FBgn0263647
FBgn0263706
FBgn0263707
FBgn0038783
FBgn0263750
FBgn0263761
FBgn0263776
FBgn0263777
FBgn0263841
FBgn0034665
FBgn0263971
FBgn0263993
FBgn0039078
FBgn0263999
FBgn0264086
FBgn0264090
FBgn0264362
FBgn0032132
FBgn0264443
FBgn0264489
FBgn0264502
FBgn0264516
FBgn0264541
FBgn0264542
FBgn0264711
FBgn0264725
FBgn0040984
FBgn0035981
FBgn0028506
FBgn0038753
FBgn0032553
FBgn0031895
FBgn0038740
FBgn0037841
FBgn0037844
FBgn0032585
FBgn0035591
FBgn0031299
FBgn0283651
FBgn0032590
FBgn0032549
FBgn0029839
FBgn0030429
FBgn0030778
FBgn0069913
FBgn0037992
FBgn0039029
FBgn0043456
FBgn0036622
FBgn0027546
FBgn0030790
FBgn0032354
FBgn0039568
FBgn0031220
FBgn0038766
FBgn0034232
FBgn0031319
FBgn0032194
FBgn0039010
FBgn0036436
FBgn0028897
FBgn0039371
FBgn0032217
FBgn0032372
FBgn0034275
FBgn0260748
FBgn0037007
FBgn0034145
FBgn0039346
FBgn0034288
FBgn0036784
FBgn0037009
FBgn0039342
FBgn0031323
FBgn0031904
FBgn0036576
FBgn0038038
FBgn0031907
FBgn0034350
FBgn0038803
FBgn0035955
FBgn0038039
FBgn0037891
FBgn0038047
FBgn0040383
FBgn0034154
FBgn0038491
FBgn0030575
FBgn0038981
FBgn0037773
FBgn0039430
FBgn0038386
FBgn0027565
FBgn0034158
FBgn0039564
FBgn0034902
FBgn0036764
FBgn0038052
FBgn0032208
FBgn0039527
FBgn0039525
FBgn0037082
FBgn0032656
FBgn0026593
FBgn0032196
FBgn0034315
FBgn0032192
FBgn0032191
FBgn0038930
FBgn0032670
FBgn0039207
FBgn0035926
FBgn0027617
FBgn0031682
FBgn0036556
FBgn0038682
FBgn0032172
FBgn0030625
FBgn0038873
FBgn0036993
FBgn0038876
FBgn0029834
FBgn0046247
FBgn0036211
FBgn0032587
FBgn0038083
FBgn0038672
FBgn0032615
FBgn0030912
FBgn0036202
FBgn0038676
FBgn0034725
FBgn0039492
FBgn0038337
FBgn0038407
FBgn0038332
FBgn0036162
FBgn0039415
FBgn0033853
FBgn0036155
FBgn0036154
FBgn0036152
FBgn0027581
FBgn0039165
FBgn0038321
FBgn0033865
FBgn0027582
FBgn0038720
FBgn0036531
FBgn0037794
FBgn0038316
FBgn0033866
FBgn0037807
FBgn0033872
FBgn0030648
FBgn0037816
FBgn0028740
FBgn0030870
FBgn0034270
FBgn0039261
FBgn0028494
FBgn0038922
FBgn0037818
FBgn0036710
FBgn0030936
FBgn0034247
FBgn0035923
FBgn0034214
FBgn0034210
FBgn0038909
FBgn0037846
FBgn0035673
FBgn0037855
FBgn0036072
FBgn0037860
FBgn0036402
FBgn0038301
FBgn0032973
FBgn0038918
FBgn0039215
FBgn0030947
FBgn0032305
FBgn0033889
FBgn0031926
FBgn0032394
FBgn0038070
FBgn0036030
FBgn0037921
FBgn0036405
FBgn0036810
FBgn0036490
FBgn0029737
FBgn0037955
FBgn0036959
FBgn0038286
FBgn0035896
FBgn0038861
FBgn0036489
FBgn0029722
FBgn0027587
FBgn0039026
FBgn0038957
FBgn0031961
FBgn0032521
FBgn0035888
FBgn0027532
FBgn0037147
FBgn0038595
FBgn0046301
FBgn0035878
FBgn0035872
FBgn0033551
FBgn0031740
FBgn0036493
FBgn0036791
FBgn0032284
FBgn0032283
FBgn0036527
FBgn0036782
FBgn0032271
FBgn0036188
FBgn0030974
FBgn0038258
FBgn0031976
FBgn0036522
FBgn0035689
FBgn0030976
FBgn0038546
FBgn0035852
FBgn0036173
FBgn0037134
FBgn0035812
FBgn0037144
FBgn0034432
FBgn0036168
FBgn0038533
FBgn0030890
FBgn0035839
FBgn0030990
FBgn0036159
FBgn0036157
FBgn0035833
FBgn0039670
FBgn0036153
FBgn0038523
FBgn0037094
FBgn0032026
FBgn0036926
FBgn0028935
FBgn0038536
FBgn0036516
FBgn0036714
FBgn0038638
FBgn0038649
FBgn0038652
FBgn0036415
FBgn0032025
FBgn0039698
FBgn0037552
FBgn0036496
FBgn0036502
FBgn0026738
FBgn0037549
FBgn0035235
FBgn0033048
FBgn0033047
FBgn0031001
FBgn0038248
FBgn0036417
FBgn0038887
FBgn0030995
FBgn0036505
FBgn0038890
FBgn0037584
FBgn0028532
FBgn0035252
FBgn0038582
FBgn0034117
FBgn0036920
FBgn0033387
FBgn0031008
FBgn0040832
FBgn0038110
FBgn0031011
FBgn0038243
FBgn0033891
FBgn0030660
FBgn0036410
FBgn0037612
FBgn0037614
FBgn0030663
FBgn0030664
FBgn0034009
FBgn0034010
FBgn0034011
FBgn0033365
FBgn0036043
FBgn0034021
FBgn0030674
FBgn0030675
FBgn0037709
FBgn0035693
FBgn0033356
FBgn0033350
FBgn0034045
FBgn0033337
FBgn0034142
FBgn0037720
FBgn0034057
FBgn0033069
FBgn0036020
FBgn0032003
FBgn0032002
FBgn0037727
FBgn0032000
FBgn0034062
FBgn0034063
FBgn0034071
FBgn0037664
FBgn0038126
FBgn0033735
FBgn0033741
FBgn0035714
FBgn0035781
FBgn0035767
FBgn0033925
FBgn0038130
FBgn0033317
FBgn0033312
FBgn0034479
FBgn0032945
FBgn0031988
FBgn0031986
FBgn0033271
FBgn0033258
FBgn0033257
FBgn0033244
FBgn0033309
FBgn0036381
FBgn0036900
FBgn0038135
FBgn0028955
FBgn0031478
FBgn0033708
FBgn0038466
FBgn0034504
FBgn0030720
FBgn0035315
FBgn0034181
FBgn0030693
FBgn0033639
FBgn0033638
FBgn0031751
FBgn0033607
FBgn0030614
FBgn0030617
FBgn0030793
FBgn0035203
FBgn0035216
FBgn0031738
FBgn0035181
FBgn0030659
FBgn0030662
FBgn0034560
FBgn0032925
FBgn0028513
FBgn0030672
FBgn0036886
FBgn0032886
FBgn0036891
FBgn0036893
FBgn0035094
FBgn0036446
FBgn0037715
FBgn0033086
FBgn0030569
FBgn0030574
FBgn0032485
FBgn0037721
FBgn0037749
FBgn0032072
FBgn0030592
FBgn0030590
FBgn0031817
FBgn0031818
FBgn0031085
FBgn0031089
FBgn0031093
FBgn0036433
FBgn0037561
FBgn0038377
FBgn0029939
FBgn0036856
FBgn0036663
FBgn0030768
FBgn0037445
FBgn0037229
FBgn0037261
FBgn0030763
FBgn0037623
FBgn0037635
FBgn0037633
FBgn0086605
FBgn0034846
FBgn0034808
FBgn0030742
FBgn0030743
FBgn0038190
FBgn0032467
FBgn0030514
FBgn0039594
FBgn0030744
FBgn0034553
FBgn0021760
FBgn0036783
FBgn0261290
FBgn0032888
FBgn0261293
FBgn0051438
FBgn0014141
FBgn0029504
FBgn0000308
FBgn0024248
FBgn0000307
FBgn0086758
FBgn0015371
FBgn0036165
FBgn0044324
FBgn0022702
FBgn0004859
FBgn0026084
FBgn0262582
FBgn0027598
FBgn0035533
FBgn0062442
FBgn0000317
FBgn0044323
FBgn0015024
FBgn0000259
FBgn0033987
FBgn0024814
FBgn0051116
FBgn0030529
FBgn0020503
FBgn0023076
FBgn0034087
FBgn0026255
FBgn0262975
FBgn0261612
FBgn0013765
FBgn0259212
FBgn0051716
FBgn0033371
FBgn0264077
FBgn0015622
FBgn0031536
FBgn0033265
FBgn0010105
FBgn0041160
FBgn0259236
FBgn0000346
FBgn0005775
FBgn0263240
FBgn0261573
FBgn0259173
FBgn0030028
FBgn0010313
FBgn0000352
FBgn0031066
FBgn0013770
FBgn0034577
FBgn0011570
FBgn0263995
FBgn0015623
FBgn0039805
FBgn0028871
FBgn0033601
FBgn0033725
FBgn0033729
FBgn0036880
FBgn0037069
FBgn0051526
FBgn0025864
FBgn0035636
FBgn0259685
FBgn0004396
FBgn0025456
FBgn0024811
FBgn0023023
FBgn0014143
FBgn0032421
FBgn0020309
FBgn0001994
FBgn0015924
FBgn0025680
FBgn0262081
FBgn0028838
FBgn0027057
FBgn0028837
FBgn0004179
FBgn0004198
FBgn0000384
FBgn0020496
FBgn0260794
FBgn0030521
FBgn0052702
FBgn0261268
FBgn0039632
FBgn0035880
FBgn0000394
FBgn0000395
FBgn0285955
FBgn0000404
FBgn0000405
FBgn0010382
FBgn0039858
FBgn0022936
FBgn0025455
FBgn0032378
FBgn0004432
FBgn0050489
FBgn0037817
FBgn0010383
FBgn0030949
FBgn0041337
FBgn0032693
FBgn0036778
FBgn0038076
FBgn0037601
FBgn0033982
FBgn0030369
FBgn0035344
FBgn0010019
FBgn0033395
FBgn0033397
FBgn0033304
FBgn0038194
FBgn0031182
FBgn0031126
FBgn0004629
FBgn0038511
FBgn0284248
FBgn0035600
FBgn0262029
FBgn0000412
FBgn0027490
FBgn0023507
FBgn0033015
FBgn0267821
FBgn0025641
FBgn0000414
FBgn0005677
FBgn0020493
FBgn0263930
FBgn0039286
FBgn0039283
FBgn0010316
FBgn0023388
FBgn0263239
[truncated: 1,837 more rows]

## Sheet: Fisher's Exact Test
	Background (neither list)	Down maternal only	Comparison only	Overlap	Fisher's exact test P-value (two-sided)	Odds ratioa
Thomsen et al. (2010) maternal degradation (class II, III)	4558	194	908	3	< 0.0001	0.0776
Thomsen et al. (2010) zygotic degradation (class IV)	4157	83	1309	114	< 0.0001	4.3618
a Odds ratio > 1 indicates overlap is greater than expected, odds ratio < 1 indicates overlap is less than expected.
	Background (neither list)	Down only	Comparison only	Overlap	Fisher's exact test P-value (two-sided)	Odds ratioa
Lott et al. (2011) maternal	6691	65	5403	194	< 0.0001	3.6961
Lott et al. (2011) zygotic and maternal zygotic	9018	220	3076	39	0.00019	0.5197
a Odds ratio > 1 indicates overlap is greater than expected, odds ratio < 1 indicates overlap is less than expected.
	Background (neither list)	Up only	Comparison only	Overlap	Fisher's exact test P-value (two-sided)	Odds ratioa
Lott et al. (2011) maternal	6537	219	5532	65	< 0.0001	0.3507
Lott et al. (2011) zygotic and maternal zygotic	9167	71	2902	213	< 0.0001	9.4766
a Odds ratio > 1 indicates overlap is greater than expected, odds ratio < 1 indicates overlap is less than expected.
	Background (neither list)	Up only	ZLD ChIP only	Overlap	Fisher's exact test P-value (two-sided)	Odds ratioa
Harrison et al. (2011) ZLD ChIP	8413	104	3727	109	<.0001	2.3658
a Odds ratio > 1 indicates overlap is greater than expected, odds ratio < 1 indicates overlap is less than expected.
